# Supplementary material for: Fake news detection in Urdu language using machine learning
Source: PeerJ Comput Sci. 2023 May 23;9:e1353. doi: 10.7717/peerj-cs.1353 (PMC10280395; doi:10.7717/peerj-cs.1353)
Supplement: Supplemental Information 1 [file peerj-cs-09-1353-s001.xlsx]

## Sheet: Sheet1
	news	label
0	; "تفصیلات کے مطابق بحریہ ٹاؤن کی جانب سے بتیس قیدیوں کی رہائی کے لیے ارش، دمن اوردیت کی مد میں چونسٹھ لاکھ روپے کی رقم ادا کی گئی۔ یہ قیدی سزاپوری کر چکے تھے لیکن جرمانہ ادا نہیں کرسکے تھے۔ اس سے پہلے بھی مخیرحضرات کی جانب سے ادائیگی پر قیدیوں کو رہا کیا جاتا رہا ہے۔"; ; "تفصیلات کے مطابق اسلام پورہ میں بچوں سے چلنے والی گولی سے دادا جاں بحق ہوگئے، حادثے کی اطلاع ملنے پر پولیس جائے وقوعہ پر پہن…	real
1	; "قصور میں مرد اور خاتون کی پھندا لگی لاشیں بائی پاس کے قریب کھیتوں سے برآمد ہوئیں، پولیس کے مطابق ملنے والی لاشوں کی شناخت کر لی گئی ہے، دونوں وحدت کالونی اور اچھرہ کے رہائشی تھے جبکہ حسنین رکشہ چلاتا تھا۔ جبکہ آمنہ بھی اچھرہ کے علاقہ میں شہریوں کے گھروں میں ملازمت کرتی تھی جبکہ حسنین شادی شدہ ہے اور اس کی ایک بیٹی ہے جنہیں پہلے قتل کیا گیا اور پھر پھندا ڈال کر لاشیں درخت کے ساتھ لٹکا دی گئی ت…	real
2	; ; "تفصیلات کے مطابق داروغہ والا میں دیرینہ دشمنی کی بناپردن دیہاڑے فائرنگ کرکےدوبھائیوں سمیت تین افراد کوقتل کردیاگیا، مقتولین میں غنی، زین اور معراج عرف لبھا شامل ہیں، واقعہ کی سی سی ٹی وی فوٹیج بھی منظر عام پر آ گئی،جس میں دیکھا جا سکتا ہے کہ ایک حملہ آور نے چادراوڑھ رکھی ہے جبکہ دوسرے نے ہیلمٹ پہناہواہے۔"; "پولیس کے مطابق مریدکے میں مقتولین کےخلاف بھی مقدمات درج تھے،پولیس نےموقع سےگولیوں کے…	real
3	; "سیشن جج لاہور نے مجرم محمد اشرف کے بلیک ورانٹ جاری کیے تھے، مجرم پر عائشہ، دیبا اور ارم کو قتل کرنے کا الزام تھا۔"; "ذرائع کے مطابق کوٹ لکھپت جیل میں سزائے موت کے قیدی اشرف نور کو صبح سویرے پھانسی دی گئی، مجرم اشرف کو موت واقع ہونے تک تختہ دار پر لٹکایا گیا، اس موقع پر جیل کے ڈاکٹر، سپرنٹنڈنٹ جیل اور مجسٹریٹ بھی کوٹ لکھپت جیل کے پھانسی گھاٹ پر موجود رہے، اشرف کی لاش اس کے لواحقین محمد لیاقت او…	real
4	; "آج ملزمہ انیقہ نے عدالت میں بیان بدل دیا، کہتی ہیں کہ اس کے بچوں کا قتل حسین نامی شخص نے کیا ہے، ملزمہ کے بیان پر جوڈیشل مجسٹریٹ نے حسین مصطفیٰ کو تفتیش کے بعد عدالت پیش کرنے کا حکم دیتے ہوئے انیقہ کے جسمانی ریمانڈ میں چار روز کی توسیع کردی۔"; "یہ خبر پڑھیں۔۔شہریوں کیلئے اچھی خبر، لاہور کا بڑا چوک ٹریفک کیلئے کھل گیا"; ; یہ خبر پڑھیں۔۔۔پاکستان کا دل لاہور بڑی تباہی سے بچ گیا; "عسکری الیون میں…	real
5	; "تفصیلات کے مطابق سی آئی اے ونگ کو انویسٹی گیشن ونگ کی نسبت زیادہ وسائل دیئے گئے ہیں، انویسٹی گیشن ونگ کی تھانوں میں صرف ایک ایک گاڑی موجود ہے جبکہ سی آئی اے ونگ کے پاس 40 گاڑیاں موجود ہیں لیکن اس کے باوجود سی آئی اے ونگ کی کارکردگی سوالیہ نشان بن کر رہ گئی ہے۔"; "ایس پی سی آئی اے عثمان باجوہ کی تعیناتی کے بعد سے تاحال سی آئی اے پولیس کوئی خاطر خواہ کامیابی حاصل نہیں کر پائی، ایس پی کی تعی…	real
6	; "پولیس کا مالکن کے بدلتے ہوئے جوابات پر شک مزید مضبوط ہوگیا جس پر مالکن ماہ رخ کے گھرکے اطراف لگے سی سی ٹی وی چیک کرنے کا فیصلہ کیا گیا، پولیس کو معلوم ہوا کہ خاتون ماہ رخ چند روز قبل کچھ خواتین کے ہمراہ گاڑی کی ڈگی میں کچھ ڈال کر کہیں گئی، مزید سوالات کرنے پر خاتون نے سچ بول دیا کہ اس نے بیٹی کا کھانا چکھنےپرعظمیٰ کو مارا۔"; ; "پولیس کونیلم بلاک کے گندے نالے سے لاش ملی تو شناخت ایک چیلنج بن گئ…	real
7	; "لاہور جیسے بڑے شہر میں ہر مہینے غیرت کے نام پر ایک قتل ہونا لمحہ فکریہ ہے، پنجاب اسمبلی میں جمع کروائی گئی رپورٹ کے مطابق شہرمیں گزشتہ 6 ماہ کے دوران غیرت کے نام پر قتل کے 6 مقدمات درج کرائے گئے، جن میں سے ابھی تک کسی ایک مقدمے کی کارروائی بھی مکمل نہیں ہوسکی، اب تک صرف 2 مقدمات کے چالان ہوئے۔"	real
8	; "تفصیلات کے مطابق قتل کی لرزہ خیز واردات شاد باغ کے چن شاہ قبرستان میں پیش آئی ہے جہاں سربراہ کی قبر کے قریب خاندانی تنازع پر ماں اور دو بیٹیوں کو گولیاں مار کر قتل جبکہ سوتیلی بیٹی کو شدید زخمی کردیا گیا ، مقامی افراد کی اطلاع پر پولیس جائے وقوعہ پر پہنچ گئی اور مقتولین کی لاشیں ضروری کارروائی کیلئے مردہ خانے جبکہ زخمی لڑکی کو ہسپتال منتقل کردیا ۔ جاں بحق ہونے والی دونوں بہنوں کی عمریں 12سے 1…	real
9	; ایس ایچ او سجاد گورائیہ کا کہنا ہے کہ ملزم کو گرفتار کر کے مزید کارروائی کے لیے خیبرپختونخواہ پولیس کے حوالے کر دیا گیا۔چوہنگ پولیس کے مطابق ملزم ندیم گزشتہ تین سال سے چوہنگ کے علاقے میں چھپ کر رہائش پذیر تھا۔ ملزم نے ذاتی دشمنی پر بٹگرام میں چار افراد کو فائرنگ کر کے قتل کیا اور لاہور آگیا تھا۔	real
10	; نشتر کالونی سے اغوا ہونے والے چھ سالہ جمیل کی لاش ڈیرہ چاہ گاؤں سے برآمد ہوئی۔ پولیس کے مطابق جمیل کو اسکے قریبی رشتہ دار نے اغوا کیا تھا اور مبینہ طور پر زیادتی کا نشانہ بنانے کےبعد گلا دبا کر قتل کر دیا۔ جمیل عرف مون کے اغوا کا مقدمہ نشتر کالونی میں درج ہے۔; یہ بھی پڑھیں: شالیمار میں آٹھ سالہ بچی کو محلے دار نے آگ لگا دی; دوسری جانب ملزم کی نشاندہی پر بچے کی لاش ڈیرہ چاہل سے برآمد کی گئی۔ ل…	real
11	; "سیشن کورٹ کے جج نے کہا کہ الیکشن ڈیوٹی پر مصروف ہوں،کیوں نہ کیس دوسری عدالت میں منقتل کردیاجائے، وکیل نے استدعا کہ نہیں کیس آپ ہی سنیں ہمیں آپ پر اعتماد ہے،وکیل کی استدعا پر جج کافیصلہ دوسری عدالت میں منتقل نہ کرنےکا فیصلہ کرلیا۔ عدالت نےپیش نہ ہونے پر گواہوں کے وارنٹ گرفتاری جاری کر دیئے۔"	real
12	; "ملزمان کا کہنا تھا کہ ہم نے قتل جعلی پیر کے کہنے پر کیا، پولیس نے تینوں ملزمان کے خلاف مقدمہ درج کر کے لاشوں کو پوسٹمارٹم کے لئے مردہ خانہ منتقل کر دیا۔تفصیلات کے مطابق تھانہ سبزہ زارکے علاقے حسن ٹاؤن میں غیرت کے نام پر بیٹے آصف نے اپنے ساتھی مظہر کے ساتھ مل کر ساٹھ سالہ ماں اور تیس سالہ بہن کو تیز دھار آلے سے قتل کر دیا ، اطلاع ملتے ہی پولیس نے ملزم آصف اس کے ساتھی سمیت جعلی پیر کوگرفتار کر ل…	real
13	; "متاثرہ خاتون کے مطابق وہ طلاق یافتہ ہے اور ایک بچے کی ماں ہے، گزشتہ روز نوکری سے واپس آرہی تھی کہ چونگی امرسدھو کے قریب اسکے کزن ساجد عرف ببلو نے 4 ساتھیوں سمیت اغواء کیا اور بعداذاں اجتماعی زیادتی کا نشانہ بنا ڈالا۔"; متاثرہ خاتون کا کہنا تھا کہ ملزمان زیادتی کرنے کے بعد زدو کوب کرتے رہے اور ویڈیو بنا کر قتل کی دھمکیاں بھی دیں۔ پولیس نے خاتون کا بیان ریکارڈ کر کے مقدمہ درج کرلیا مگر تاحال ملز…	real
14	; منصوبے کے تحت پنجاب کی بڑی جیلوں میں قید تمام مجرموں کے فنگر پرنٹس اور پام پرنٹس لیے جائیں گے۔ جس کے لیے جدید طرز کے 40 رول سکینرز کی تنصیب کی جائے گی۔ ڈیٹا بیس کا سینٹرل سیٹلائٹ سسٹم پنجاب فرانزک سائنس ایجنسی میں بنایا جائیگا۔ جدید فنگر پرنٹ سسٹم30 سیکنڈ میں1 کروڑ فنگر پرنٹس میچ کر سکے گا۔ 3 ماہ میں منصوبے کے لیے درکار مشینری خریدی جائے گی۔ منصوبے کو 6ماہ میں آپریشنل کر دیا جائیگا۔; تفصیلات ک…	real
15	; ; اسلامپورہ انویسٹی گیشن پولیس نے سپریم کورٹ آف پاکستان کا پی ا ے بن کر لوگوں کو فون کالز کرنے والے ملزم لیاقت حسین کو بھی گرفتار کر لیا۔ جبکہ بھاٹی گیٹ میں پچاس سالہ شخص کو دوران واردات قتل کرنے والے تین ملزمان بھی گرفتار کر لیے گئے۔; ; ملزم کا کہنا ہے مقتول اصغرانکی استاد کو نازیبا ایس ایم ایس اور کالز کرکے تنگ کرتا تھا۔ قتل کی واردات میں توحید کے دوست موسیٰ نے اس کی مد د کی تھی۔ پولیس نے دون…	real
16	; "ایس ایچ او تھانہ شادباغ کا کہنا تھا کہ خاتون کا کافی عرصے سے سسرال سے جھگڑا چل رہا تھا، جبکہ اسی سلسلہ میں تلخ کلامی کے دوران اس کے خاوند نے اس پر تشدد کیا جس کے باعث وہ جاں بحق ہوگئی، پولیس کا کہنا ہے ملزم کو جلد گرفتار کر لیا جائے گا۔"; "تفصیلات کے مطابق نیو شادباغ کے رہائشی کاشف کا اپنی بیوی ثمینہ کے ساتھ جھگڑا ہوا، جس کے بعد شوہر نے لڑائی کے دوران قریب پڑے ہوئے ڈنڈے سے اس کے سر پر وار کیا …	real
17	; "تفصیلات کے مطابق واپڈا ٹاؤن میں جوتوں کے معروف برانڈ کے تہہ خانےمیں سیکیورٹی گارڈ کی لاش دیکھ کر ملازمین نے پولیس کو اطلاع دی جس پر پولیس جائے وقوعہ پر پہنچ گئی اور نعش کو قبضہ میں لے کر مردہ خانے منتقل کردیا، پینتالیس سالہ سیکیورٹی گارڈ کی شناخت نصیر احمد کے نام سے ہوئی جس کے سر میں گولی لگی تھی۔"; پولیس کا کہنا ہے کہ جائے وقوعہ سے فنگر پرنٹس اور دیگر شواہد اکٹھے کر لیے ہیں۔ واقعہ قتل ہے یا خ…	real
18	; "پولیس کے مطابق ملزمہ آلہ قتل سمیت تھانے میں پیش ہو گئی جس کو پولیس نے گرفتارکرکے کاروائی شروع کردی ہے، مقتول مدثرکو مقامی قبرستان میں سپردخاک کر دیا گیا ہے۔"; "پولیس کے مطابق محلہ مشن کالونی کے رہائشی مدثر نے شادی شدہ خاتون فضہ کو شادی کا جھانسہ دیا، جس پرفضہ نے مدثر سے شادی کے لئے شوہر سے طلاق لے لی۔ بعدازاں مدثر نے فضہ کے بجائے کسی اور خاتون سے شادی رچالی جس پر فضہ نے طیش میں آکرمدثر کو گول…	real
19	; علاوہ ازیں جوائنٹ انویسٹی گیشن ٹیم نے ملزم عمر کے بیان کے بعد اس کے بھائی کو بھی حراست میں لے کر اس کے ڈی این اے کے لیے سیمپل لے لیے ہیں۔; ; تفصیلات کے مطابق لاہور پولیس نے16جنوری کو بھٹہ چوک میں کرائے کے مکان میں رہائش پذیر عمر نامی ملزم کو حراست میں لیا تھا۔ جس نے دوران تفتیش سی سی پی او لاہور امین وینس اور ڈی آئی جی آپریشنز ڈاکٹر حیدر کے سامنے بچی کے ساتھ زیادتی اور اس کو قتل کرنے کا اعتراف…	real
20	; تفصیلات کے مطابق انسداد دہشت گردی کی خصوصی عدالت میں پولیس نے قصور کی سات سالہ بچی زینب کے قتل کیس کے مرکزی ملزم عمران علی کو سخت حفاظت میں پیش کیا۔ پولیس کی بھاری نفری نے عمران علی کی گاڑی کو چاروں طرف سے گھیررکھا تھا۔ ملزم کو عدالت میں پیش کیا گیا تو اس کے چہرے پر نقاب تھی۔; "اس موقع پر ملزم کے ڈی این اے، پولی گرافک ٹیسٹ سے متعلق رپورٹ بھی عدالت میں پیش کی گئی۔ تفتشی افسر نے استدعا کی کہ عدال…	real
21	; "اے ٹی سی کی جانب سے بھجوائے جانے والے مرڈر ریفرنس میں جرم کی نوعیت، معاشرے میں اس گھناؤنے جرم کے اثرات اور سزائے موت دینےکے مختلف قانونی پہلوؤں پرروشنی ڈالی گئی ہے۔"; انسداددہشت گردی کورٹ کی جانب سے بھجوائے جانےوالے مرڈرریفرنس میں استدعا کی گئی ہے کہ مجرم عمران کو سزائے موت دینے کےفیصلے کی توثیق کی جائے تاکہ اس پرعمل درآمد ہوسکے۔ انسداددہشت گردی کورٹ کی جانب سے بھجوائے گئے ایم آر کی سماعت لا…	real
22	; "ان کاکہناتھا کہ ڈی این اے ٹیسٹ کےدوران بھی ملزم کی حرکات وسکنات مشکوک تھی اورملزم پرخصوصی نگاہ رکھی۔ حاجی امین انصاری کےقریبی عزیزمحمد سہیل کاکہناتھاکہ پہلےدن سے ہی انہیں عمران پر شک تھا،اور14جنوری کو تصاویر بھی پولیس کو دی تھیں ،اورآر پی او کوبھی اس حوالےسےمطلع کر دیا ہے۔"; تفصیلات کے مطابق معصوم زینب کےوالد حاجی محمدامین نےماڈل ٹاؤن میں سٹی فورٹی ٹوسےخصوصی گفتگو کرتے ہوئےکہاکہ انکےماموں کےب…	real
23	; "اس دوران بچوں نے ماں کو بچانا چاہا توملزم نے انہیں بھی تشدد کا نشانہ بنایا، پولیس نے شوہر کو حراست میں لیکر قتل اورخودکشی سمیت دگیر پہلووں پر تحقیقات شروع کردی ہیں."; "پولیس کے مطابق رائیونڈ کےعلاقے گلی دین جانی کی رہائشی سات بچوں کی ماں کوتشویشناک حالت میں ہسپتال منتقل کیا گیا جہاں وہ دم توڑ گئی، پولیس نے ضروری کارروائی کے بعد لاش پوسٹ مارٹم کے لئے مردہ خانے منتقل کر دی، پولیس کا کہنا تھاکہ گ…	real
24	; "تفصیلات کے مطابق ساندہ کے علاقے بند روڈ پر گھریلو تنازع پر شوہر شیر علی نے اپنی بیوی رضیہ کو تیز دار آلہ سے قتل کردیا اور موقع سے فرار ہوگیا، حادثے کی اطلاع ملنے پر پولیس جائے وقوعہ پر پہنچ گئی اور مقتولہ کی لاش قبضہ میں لے کر پوسٹمارٹم کیلئے مردہ خانے منتقل کردی۔"; "پولیس کا کہنا ہے کہ مقتولہ کے سر پر گہری چوٹ کا نشان ہے، مزید حقائق پوسٹمارٹم رپورٹ آنے کے بعد واضح ہونگے۔"	real
25	; تھانہ گرین ٹاؤن کے علاقہ فیروز پارک کا رہائشی پرویز اپنے دو بیٹوں 9 سالہ داؤد اور 6 سالہ یشواز کو چار ماہ قبل لے کر دوسری بیوی کے پاس چلا گیا جہاں وہ دونوں بچوں پر تشدد کرتا تھا۔ پہلی بیوی یاسمین کے مطابق پرویز پہلے بھی تشدد کرتا تھا اور اکثر بچوں کو ساتھ لے جاتا تھا۔پولیس نے لاش تحویل میں لے کر پوسٹ مارٹم کے لیے مردہ خانے منتقل کردی ہے جبکہ بچوں کا والد پرویز موقع سے فرار ہوگیا ہے جس کی گرفتار…	real
26	; ملزم کا کہنا تھا کہ اس کا ایک ساتھی ڈکیتی مزاحمت کے دوران مارا گیا اور اس کی بیوی آئے روز اس کے بارے میں پوچھتی تھی جس سے تنگ آکر اس نے اپنے ساتھی کی بیوی کو بھی قتل کر دیا۔; ملزم خادم حسین کے جرم کی کہانی 50 سال پہلے شروع ہوئی جب اس نے اپنے بھائی کا انگوٹھا کاٹ کر اس کی جائیداد دھوکہ دہی سے اپنے نام کروائی اور اپنی بھابھی کو تشدد کا نشانہ بنا کر اس کی پسلیاں توڑ دیں۔ پولیس کا کہنا ہے کہ ملزم…	real
27	; "سٹوڈیو ٹیکنیشن سٹی 42 عبدالصبور قتل کو زہر دے کر قتل کر دیا گیا ، پولیس کے مطابق عبدالصبور کو زہر دیا گیا ہے ، عبدالصبور شام 6 بجے کے قریب گھر سے نکلا تھا ، پولیس کا کہنا تھا کہ واقعہ کی تحقیقات شروع کر دی گئیں ہیں اور ملزم کو جلد حراست میں لے لیا جائے گا ،دوسری جانب مقتول کے والد اور ماموں کا کہنا تھا کہ ہمیں انصاف فراہم کیا جا ئے ،انہوں اعلیٰ حکام سے انصاف کی اپیل کی ہے ۔پولیس حکام کا کہنا ت…	real
28	; "ملزمان نے رات گئے میڈیسن مارکیٹ کے اندر گھس کر سکیورٹی گارڈ کو قتل کیا، عینی شاہدین کا کہنا تھا کہ مارکیٹ کا مین گیٹ کھلا ہوا تھا اور دروازے کے اندر راوی خان کی لاش پڑی تھی۔ میڈیسن مارکیٹ کے تاجروں اور مقتول کے لواحقین کا کہنا تھا کہ راوی خان کی کسی سے دشمنی نہیں تھی۔پولیس کے مطابق انھیں اطلاع ملی کے میڈیسن مارکیٹ کے سکیورٹی گارڈ کو قتل کر دیا گیا ہے، جس پر پولیس نے موقع پر پہنچ کر لاش کو اپنی…	real
29	; "تفصیلات کے مطابق سی آئی اے لاہور کا اشتہاریوں کیخلاف کریک داؤن کا سلسلہ جاری ہے جبکہ سی آئی اے پولیس نے کارروائی کرتے ہوئے تین اشتہاری ملزمان کو گرفتار کیا ہے،ملزمان پر قتل اقدام قتل اور ڈکیتی کے مقدمات درج تھے۔"; "گرفتار ملزمان میں رفیق،اعجاز اور ذیشان شامل ہیں جبکہ اعجاز اور ذیشان شیخوپورہ پولیس کو مطلوب تھے، ایس پی سی آئی اے ندیم عباس کے مطابق ملزموں کو جدید ٹیکنا لوجی اور موثر انفارمیشن س…	real
30	; "ڈی ایس پی انور سعید کنگرہ کے مطابق مغلپورہ میں ایک سال قبل آصف نامی نوجوان کی لاش کھیتوں سے برآمد ہوئی جس کی تفتیش تھانے میں ہوتی رہی لیکن اندھے قتل کو ٹریس نہ کیا جا سکا۔ سی آئی اے صدر پولیس نے اندھے قتل کی تفتیش کا آغاز کیا اور مقتول کے تین دوستوں راحیل، نور اختر اور آصف کو شامل تفتیش کیا جنہوں نے اعتراف جرم بھی کر لیا۔"; "پولیس کا کہنا تھا کہ ملزمان نے اعتراف کیا کہ وہ مقتول آصف کو نشے ک…	real
31	; "تفصیلات کے مطابق شاہدرہ ٹاؤن کے علاقہ پرانا راوی پل لوہا مارکیٹ میں میں غیرت کے نام پرایک شخص قتل، دوسرا زخمی ہو گیا۔ ملزم نے واردات کے بعد خود کو بھی گولی مار کرزندگی کا خاتمہ کرلیا۔ جاوید نامی شخص نے اندھا دھند فائرنگ کر کے اصغر کو قتل جبکہ اس کے ساتھی سلمان کو شدید زخمی کر دیا۔ بعد ازاں ملزم نے خود کو بھی گولی مار کر اپنی زندگی کا خاتمہ کر لیا۔"	real
32	; "پولیس کے مطابق خاتون آمنہ کو ہومی سائیڈ انویسٹی گیشن پولیس نے تفتیش کے سلسلے میں پولیس اسٹیشن بلایا جہاں مخالفین ارشاد،فریاد اور سلمان بھی موجود تھے۔ آمنہ پولیس تفتیش کے بعد گھر جانے کے لئے نکلی جس پرملزمان نے خاتون کو اندھا دھند فائرنگ کر کے قتل کردیا۔"; واضح رہے کہ آمنہ زخموں کی تاب نہ لاتے ہوئے موقع پر جاں بحق ہو گئی۔ پولیس کا کہنا تھا کہ ملزمان فائرنگ کر کے موقع سے فرار ہو گئے جبکہ موقع سے…	real
33	; "قائم مقام ایس پی سٹی منصور قمر نے واقعہ کا نوٹس لیتے ہوئے ڈی ایس پی شاھدرہ کو واقعہ کی تحقیقات کا حکم دے دیا جبکہ اقدام قتل ، تیزاب گردی، دہشت گردی کی دفعات شامل کر کے مقدمہ درج کر لیا گیا۔"; دوسری جانب سے خاتون کے اہل خانہ کا کہنا ہے کہ شوہر وحید آئے روز تشدد کا نشانہ بناتا تھا اور بہن بائیوں سے میل جول سے روکنے اور طلاق دینے کے مطالبے پر آج پھر تشدد کا نشانہ بنایا اور کچھ دیر بعد آکر چہرے او…	real
34	; "ملزم نے استانی کی بہن فرخندہ کو بھی ہتھوڑا مار کر شدید زخمی کردیا، اطلاع ملتے ہی ڈولفن پولیس نے ملزم کو گرفتار کرلیا اور مزید کارروائی کیلئے تھانہ سندر پولیس کے حوالے کردیا،زخمی فرخندہ کو جناح ہسپتال منتقل کردیا گیا ہے جبکہ مقتولہ شگفتہ کی لاش پوسٹ مارٹم کیلئے مردہ خانے منتقل کردی گئی ہے۔تفصیلات کے مطابق تھانہ سندر کے علاقہ مراکہ گاؤں میں 35سالہ شگفتہ پرائیویٹ سکول کی ٹیچرتھی،جبکہ ملزم 16سالہ …	real
35	; عابد باکسر نے بتایا کہ گیارہ اکتوبر کو انہیں پولیس مقابلے میں قتل کرنے کا منصوبہ بنا لیا گیا تھا لیکن ان کی خوش قسمتی کہ ملک میں ایمرجنسی لگ گئی۔ عابد باکسر کا مزید کہنا تھا کہ بعد میں ان کے ماموں کو ماورائے عدالت گرفتار کرکے تشدد کا نشانہ بنایا گیا۔ تشدد سے ان کی موت واقع ہوئی لیکن اسے طبعی موت قرار دے دیا گیا۔; ویڈیو پیغام میں عابد باکسر نے انکشاف کیا کہ معاملہ ان کے ماموں کی زمین سے شروع ہوا…	real
36	; "تفصیلات کے مطابق عسکری الیون میں گھر میں سوئے تین معصوم بچوں کو گلا دبا کر قتل کر دیا گیا، جن میں آٹھ سالہ زین العابدین، 6 سالہ کنیز فاطمہ،4 سالہ ابرہیم شامل ہیں۔ حادثے کی اطلاع ملنے پر پولیس جائے وقوعہ پر پہنچ گئی اور نعشیں قبضہ میں لے کر مردہ خانے منتقل کردیں۔"; "یہ خبر پڑھیں۔۔۔حضرت مادھول لعل حسینؒ کے عرس کی تقریبات شروع " لاہور میں آج مقامی تعطیل""; خاتون نے اپنے بیان میں کہا ہے کہ ان کے…	real
37	; "پولیس سٹشین ہئیر کے علاقہ عسکری الیون میں چوبیس مارچ کو تین بچوں کوقتل کر دیا گیا تھا، جن میں دس سالہ زین العابدین، چھ سالہ کنیز فاطمہ اور چارسالہ ابراہیم شامل تھے۔ پولیس نے انیقہ کے سابق شوہر قیصرامین باجوہ کی مدعیت میں مقدمہ درج کرنے کے بعدتفتیش کے لیے بچوں کی والدہ اوراسکے آشنا حسین مصطفے کو گرفتار کر لیا ۔ دوران تفتیش انیقہ نے اعتراف جرم کرتے ہوئے کہا ہے کہ اس نے اپنے تینوں بچوں کے منہ پرج…	real
38	; "یہ بھی ضرور پڑھیں: ظلم کی انتہا، شاہدرہ میں سسرالیوں نےبہو کو زندہ جلا دیا"; "دوسری جانب فریحہ شدید زخمی ہو گئی تھی۔ پولیس نے قتل کے مرکزی ملزم کو گرفتار کر لیا ہے، اور واقعہ کے حوالے سے مزید تفتیش کی جا رہی ہے۔"; سٹی 42 نیوز ذرائع کے مطابق نوانکوٹ کے علاقے میں دس روز قبل رؤف نامی شخص نے غیرت کے نام پر اپنی چھوٹی بہن فریحہ اور بہنوئی عادل پر فائرنگ کر دی تھی۔ جس کے نتیجے میں پچیس سالہ عادل موق…	real
39	; "پولیس نے قتل ہونیوالی 25 سالہ طیبہ کے والدین ، شوہر، بھائی کو گرفتار کرلیا۔ دوران تفتیش ملزمان نے اعتراف کیا کہ بدچلنی کی وجہ سے طیبہ کو قتل کیا۔ تھانہ سٹی رائیونڈ پولیس نے واقعہ کا مقدمہ درج کرتے ہوئے ملزمان کیخلاف مزید کارروائی شروع کردی ہے۔"; ; "تفصیلات کے مطابق والدین ، بھائی اور خاوند نے غیرت کے نام پر 25 سالہ وفا عرف طیبہ کو گلے میں پھندا ڈال کر قتل کردیا۔ طیبہ کی لاش کو رات کی تاریکی می…	real
40	; "موقع پرموجود افراد نے عائشہ کو پکڑکر اسے پولیس کے حوالے کردیا۔ پولیس کا کہنا تھا کہ مقتول عمراس کی بیٹی سے ناجائزتعلقات قائم کرنا چاہتا تھا، منع کرنے پروہ بازنہ آیا جس پرخاتون نے اُسے قتل کردیا، پولیس نے ملزمہ کے خلاف مقدمہ درج کر کے کارروائی شروع کر دی۔"; "پولیس کے مطابق ملزمہ عائشہ عمر نامی شخص کے دفترمیں موجود تھی جہاں دونوں کے درمیان گالم گلوچ ہوگئی، موقع پرموجود افراد نے عمراور عائشہ کے د…	real
41	; "سوشل میڈیا کی مدد سے دنیا گلوبل ویلیج تو بن گئی ہے، لیکن اسی سوشل میڈیا پر ملنے والے کچھ دوست بنے ڈاکو، گلیمر کے شوقین بالے خان، رگو بھائی اور راہب نے عید اکٹھی کرنے کے لیے وارداتیں شروع کیں، اور اسلحہ خرید لیا۔ موٹر سائیکل چھینتے اور پھر اسی موٹر سائیکل پر لوٹ مار کرتے۔"; "پولیس نے ملزمان کے قبضے سےایک لاکھ روپے، اسلحہ اور موبائل فون برآمد کرلئے۔ تینوں دوست اب تک 8 سے زائد وارداتوں کا اعتراف …	real
42	; "تفصیلات کے مطابق جوڈیشل مجسٹریٹ احمد ندیم نیازی کے روبرو تھانہ سول لائن پولیس نے ملزمان عاشق دین، قاسم، آصف اور یاسر حسین کے خلاف درج مقدمات کا چالان پیش کیا۔درخواست گزار کے وکیل نے عدالت میں موقف اختیار کیا کہ ملزمان نے معمولی تلخ کلامی کے بعد درخواست گزار کو قتل کرنے کی کوشش کی تھی،پولیس نے کارروائی کرتے ہوئے ملزمان کو گرفتار کر کے مقدمہ درج کیا ہے ،درخواست گزار وکیل نے استدعا کی کہ ملزمان ک…	real
43	; "تفصیلات کے مطابق ن لیگ کی ایم پی اے کنول نعمان کہتی ہیں کہ ملزم کوسخت سزا ملنی چاہیئے، قصورکی سات سالہ زینب اوردیگر بچیوں کو زیادتی کیبعد قتل کرنے والے درندہ صفت ملزم عمران کے خلاف شہریوں کا پارہ ہائی تو تھا ہی لیکن اب عوامی نمائندے بھی ملزم کو سرعام سنگسار کرنے کامطالبہ کرنے لگے ہیں۔"; "ٹوئنٹی فورنیوز کے اسٹوڈیومیں گفتگوکرتے ہوئے ایم پی اے کنول نعمان کا کہنا تھاکہ ملزم نے جوگھناونا جرم کیا ہے…	real
44	; "ایسے مناظرکو دیکھ کر یوں محسوس ہوتا ہے کہ جیسے سدھائے ہوئے جانور ہیں کہ سیدھے اپنے ٹھکانے پرجا کر رکیں گے، ایسی سنگین غفلت پرلاہورپولیس کے اعلی افسران کوایکشن لینا ہوگا اورپیشی پرلانے اورلےجانے کے لیے گاڑیوں کی فراہمی یقینی بنانی ہوگی۔"; "تفصیلات کے مطاقب کیمپ جیل کے گیٹ کے باہرکھڑے ہوں تو ایسا لگتا ہے کہ پولیس اہلکارقیدیوں کو پیشی سے نہیں پکنک سے واپس لے کرجیل آرہے ہیں، پولیس اہلکار ملزمان کو…	real
45	; تفصیلات کے مطابق گجر پورہ کے رہائشی عدنان کا اپنے بھتیجوں کے ساتھ جائیداد کا تنازع چل رہا تھا۔ بدھ کے روز دونوں کے درمیان جھگڑا ہوا جس دوران عدنان کے بھتیجوں نے چھریوں کے وار کر کےاسےقتل کر دیا۔	real
46	; تفصیلات کے مطابق گرین ٹاؤن جیوا پارک کے علاقہ میں ماں اور 2 بچوں کے قتل کا مقدمہ درج کر لیا گیا ہے۔ مقدمہ 24 سالہ عائشہ کی والد ہ پروین کی مدعیت میں شوہر محمدعثمان کیخلاف درج کیا گیا ہے۔ ایف آئی آر میں عائشہ کی والدہ نے موقف اختیار کیا ہے کہ عائشہ نے اسلام قبول کر کے تین سال قبل عثمان سے دوسری شادی کی تھی اور پہلی شادی میں عائشہ کے بچے بھی تھے جنکی وجہ سے دونوں میں لڑائی جھگڑا رہتا تھا۔	real
47	; "تفصیلات کے مطابق گلبرگ میں پروفیسر تنظیم قتل کیس میں اہم پیشرفت سامنے آگئی پولیس نے ایک طالبہ کو حراست میں لے لیا ہے، طالبہ جی سی یونیورسٹی میں ہی بی ایس سی کی طالبعلم ہے، طالبہ نے میسج کیا تھا جس پر پروفیسر جائے حادثہ پر پہنچا تھا، طالبہ سے ملاقات کے چند منٹ بعد ہی نامعلوم افراد نے پروفیسر کو گولیاں مار کر قتل کر دیا تھا۔"	real
48	; "تفصیلات کے مطابق گڑھی شاہو مین بازار میں 20سالہ نوجوان کو قتل کردیا گیا جس کی شناخت سجاول کے نام سے ہوئی ہے، نا معلوم ملزمان قتل کے بعد لاش سڑک پر پھینک کر فرار ہوگئے۔ پولیس نے لاش کو تحویل میں لے لیا، جبکہ گھر والوں کی شناخت کے بعد والد کی مدعیت میں نا معلوم ملزمان کے خلاف مقدمہ درج کر لیا گیا ہے۔مقتول سجاول کے والد کا کہنا تھا کہ سجاول گزشتہ روز کال آنے پر گھر سے نکلا جس کے بعد واپس نہ آیا…	real
49	; "ہنجروال کے علاقے میں گھر کے باہر سوئے ہوئے شخص کو نامعلوم افراد نے فائرنگ کر کے قتل کر دیا، پولیس کے مطابق پینتیس سالہ محمد آصف اپنے گھر کے باہر سویا ہوا تھا کہ نامعلوم افراد نے آکر فائرنگ کی۔ فائرنگ سے آصف موقع پر ہی جاں بحق ہوگیا جبکہ ملزمان فرار ہوگئے، پولیس نےجائے وقوعہ پر پہنچ کر ضروری شواہد اکھٹے کر نے کے بعد نعش کو پوسٹمارٹم کیلئے جناح ہسپتال کے مردہ خانے میں منتقل کر دیا۔"	real
50	; "ایس پی اقبال ٹاون انوسٹی گیشن شازیہ سرور نے پریس کانفرنس کرتے ہوئے کہا کہ عظمی ماہ رخ نامی عورت کے گھر میں راوی روڈ پر آٹھ ماہ ملازمت کرتی رہی، تین ماہ سے والدین کو عظمی سے ملنے نہیں دیا جا رہا تھا۔ گھر کی مالکن ماہ رخ نے عظمی کے لواحقین کو اطلاع دی گئی کہ انکی بیٹی زیورات چوری کر کے فرار ہو گئی ہے۔ ایس پی شازیہ کا کہنا تھا کہ پوسٹمارٹم رپورٹ میں واضع ہو چکا ہے کہ تشدد کے باعث عظمی کی ہلاکت ہو…	real
51	; ; "واضح رہے کہ گزشتہ روزلاہور ائیر پورٹ کے انٹرنیشنل لاؤنج کے باہر 2 افراد نے فائرنگ کی تھی جس کے نتیجے میں 2 افراد جاں بحق اورتین زخمی ہوگئےتھے،پولیس نے فائرنگ کرنے والے دونوں افراد اکرام اور ارشد کو اسلحہ سمیت گرفتار کرلیا تھا۔"; "پولیس نے مقدمہ مقتول زین علی عرف نفیس جٹ کے چچا و سسر محمد خفیظ کی مدعیت میں درج کیا جبکہ مقدمہ ملزمان ارشد ، شان، عمار بٹ اور علی ولد اعجاز کی موقع پر موجودگی ظاہر…	real
52	; "متاثرین انصاف کے لیے دربدر کی ٹھوکریں کھانے پر مجبور ہیں، لاہور میں ایک سال کے دوران دس بچے اغوا ہونے کے بعد قتل کیے گئے جبکہ 16 ہزار زیادتی اور قتل کے 18 سو کیسز بھی حل ہی نہیں کیے جاسکے۔"; "تفصیلات کے مطابق توجہ دلاو نوٹس تحریک انصاف کے ڈاکٹر مراد راس نے جمع کرایا، نوٹس میں کہا گیا ہے کہ لاہور سمیت صوبے بھر میں اغوا، زیادتی اور قتل کے 18 سو کیسز پولیس کی فائلوں میں گم ہیں۔"; ;	real
53	; "سٹی 42 کے مطابق نشتر کالونی میں چھت پر سویا ہوا 45 سالہ قاضی شعبان اندھی لگنے سے ہلاک ہو گیا۔ پولیس کا کہنا ہے کہ قاضی شعبان احمد ہوائی فائرنگ کی وجہ سے ہلاک ہوا، ضروری کارروائی کے بعد لاش مردہ خانے منتقل کر دی گئی۔"; دوسری جانب کاہنہ کے علاقے میں محمد آصف کو نامعلوم افراد نے فون کر کے گھر سے باہر بلوا کر موبائل اور نقدی چھین کر ڈنڈے مار کر ہلاک کردیا۔ پولیس نے آصف کی لاش بھی مردہ خانے منتقل ک…	real
54	; "جمیل کا کہنا ہے کہ اسکی بیٹی کو زیادتی کے بعد قتل کیا گیا ہے، اس کو پولیس انصاف فراہم کرے۔"; ایس پی سٹی معاذ ظفر کا کہنا ہے کہ جائے وقوعہ سے لگتا ہے کہ بچی کو زیادتی کے بعد قتل کیا گیا ہے لیکن اصل حقائق پوسٹمارٹم رپورٹ کے بعد سامنے آئیں گے۔ پولیس نے جمیل کی مدعیت میں مقدمہ درج کر کے تفتیش شروع کردی ہے۔; لاہور کے علاقہ لوہاری گیٹ میں درندگی اور سفاکیت کا افسوسناک واقعہ پیش آیا جہاں محلہ تیلیاں…	real
55	; میڈیکل رپورٹ کے مطابق عائشہ کے جسم کے مختلف حصوں پر تشدد اور خراشوں کے دس سے زائد نشانات ہیں جبکہ عائشہ کو زیادتی کا نشانہ بنانے کے بعد گلا دبا کر بے دردی سے قتل کیا گیا۔ پولیس حکام کا کہنا ہے کہ عائشہ کے والد طارق کے بیان پر نامعلوم ملزمان کے خلاف مقدمہ درج کرلیا گیا جبکہ عائشہ کے سگے ماموں سمیت 3 افراد پولیس کی تحویل میں ہیں۔; "واضح رہے کہ 20 دسمبر کو لاہور کے علاقہ لوہاری گیٹ میں درندگی اور …	real
56	; یہ خبر پڑھیں۔۔۔ملک خانہ جنگی کی طرف بڑھ رہا ہے: شیخ رشید; تفصیلات کے مطابق مانگامنڈی کے کھیتوں سے برآمدہونے والی پانچ سالہ بچے کی لاش کی تاحال شناخت نہیں ہوسکی۔ پولیس نے جائے وقوعہ سے شواہد اکٹھے کرکے لاش کو قبضہ میں لے کر پوسٹمارٹم کیلئے مردہ خانے منتقل کر دیا ۔ پولیس کے مطابق لاش ایک روز پرانی ہے۔ بچے کے گلے سے کپڑے کا پھندا بھی ملا ہے۔ شبہ ہے کہ بچے کو گلہ دبا کر قتل کیا گیا۔; "خبر پڑھیں۔۔۔ج…	real
57	; "تفصیلات کے مطابق ماہ صیام سے قبل پولیس کی جانب سے شہریوں کی جان ومال کی حفاظت کے لیے اقدامات کرنے کےدعوے کیے جاتے ہیں لیکن پولیس کا ریکارڈ کچھ اور ہی بتاتا ہے۔ پولیس ریکارڈ کے مطابق شہر کےمختلف علاقوں میں ڈکیتی و اسٹریٹ کرائم کی سو سے زائد وارداتیں رپورٹ ہوئیں جبکہ دو افراد کو ڈکیتی مزاحمت پرقتل کیا گیا، متعدد واقعات سی سی ٹی کیمروں نے ریکارڈ ہی نہیں ہو سکے۔"	real
58	; "پولیس نے لاش پوسٹمارٹم کے لیے مردہ خانے منتقل کر دی ہے، مزید حقائق پوسٹمارٹم رپورٹ کے بعد معلوم ہو سکیں گے۔"; "پولیس کا کہنا ہے کہ جائے وقوعہ سے آلہ قتل سمیت فرانزک ٹیم نے شواہد اکھٹے کر لیے ہیں، ندیم کےساتھ کام کرنے والے دیگر ملازمین کے بیانات بھی قلمبند کر لیے گئے ہیں۔"; "تفصیلات کے مطابق مغلپورہ میں قتل کی لرزہ خیز واردات سے علاقے میں خوف و ہراس پھیل گیا۔۔کارخانے سے ندیم اقبال نامی مزدور کی…	real
59	; دکان کے مالک شہزاد کے لواحقین کی جانب سے فیکٹری ایریا تھانے میں ملزم کے خلاف مقدمہ درج کروا دیا گیا ہے مگر ملزم تاحال فرار ہے۔ پولیس کا کہنا ہے کہ ملزم کو جلد گرفتار کرلیا جائے گا۔; "پولیس کے مطابق شہزاد نامی شہری کی والٹن روڈ پر پینٹ کی دکان تھی، شہزاد کی اپنے ملازم کے ساتھ معمولی بات پر تلخ کلامی ہوئی جس پر ملازم نے طیش میں آکر فائرنگ کردی۔ شہزاد کو 3 گولیاں لگیں اور وہ موقع پر ہی دم توڑ گیا …	real
60	; "واقعہ باغبانپورہ کے علاقے لکھو ڈیر میں پیش آیا جہاں چند روز سے ناراض رابعہ میکے میں تھی کہ اچانک شوہر شہباز وہاں پہنچ گیا اور پے در پے وار کر کے بیوی کو قتل اور بچے کو زخمی کر دیا، بعدازاں چیخ و پکار پر مقتولہ کے بھائی نے ملزم کو دبوچ لیا اور درگت کا نشانہ بنا کر پولیس کے حوالے کر دیا، زخمی بچے ذیشان کو ہسپتال منتقل کر دیا گیا۔"	real
61	; "سبحان نامی بچے کو 14 جولائی کو باٹا پور میں بدفعلی کے بعد بے دردی سے قتل کردیا گیا تھا، مختلف پہلوؤں پر ہونیوالی تفتیش نے 4 مشتبہ افراد میں سے قاتل کی شناخت کرا دی، ملزم اعظم اقبال مقامی رہائشی اور ایک بیٹی کا باپ ہے، جسے پولیس نے11 روز بعد ٹریس کرلیا، ملزم نے واردات کا اعتراف کرتے ہوئے گھناؤنے فعل پر شرمندگی کا اظہار کیا۔"; "پولیس کا کہنا ہے کہ اعتراف جرم کے بعد ڈی این اے سمیت دیگر فرانزک رپو…	real
62	; پولیس نے والد کی مدعیت میں قتل کی دفعات کے تحت مقدمہ درج کر کےعمران کو حراست میں لے لیا۔ پولیس نے علی رضا کی لاش کو پوسٹمارٹم کیلئے مردہ خانے منتقل کر کے مزید تفتیش شروع کر دی ہے۔; باغبانپورہ کےعلاقےشادی پورہ میں بائیس سالہ علی رضا اوراسکے چھوٹےبھائی کےدرمیان بل کی ادائیگی پر تلخ کلامی شروع ہو گئی۔ عمران نےبڑے بھائی علی رضا کے سر پر وائپر دے مارا۔ دو روز سے ہسپتال میں داخل علی رضا بالآخر دم توڑ…	real
63	; تفصیلات کے مطابق بھاٹی گیٹ کے علاقہ پیر مکی میں دوہرے قتل کی واردات کا مقدمہ دہشت گردی سمیت دیگر سنگین دفعات کے تحت درج کر لیا گیا۔ رہنما پی ٹی آئی اعجاز چودھری بھی مظاہرین کا ساتھ دینے پہنچ گئے۔	real
64	; "فوٹیج میں دیکھا جا سکتا ہے کس طرح ڈاکوموٹرسائیکل پرگاڑی کا تعاقب کرتے رہے، سنسان علاقے میں پہنچنے پر ڈاکوؤں نے اسے روک لیا، ایک ڈاکو نے گاڑی پرکلاشنکوف سے فائر کھول دیئے۔"; ڈاکو کا دوسرا ساتھی ساتھ کھڑا آس پاس پر نظر دوڑاتا رہا اور واردات کے بعد موٹرسائیکل پرفرار ہو گیا۔ ڈاکوؤں کی فائرنگ سے زخمیوں نے جان بچانے کے لئے گاڑی دوڑانے کی کوشش کی لیکن زخموں سے چُور ڈرائیور کی گاڑی دیوار سے ٹکرا گئی۔ …	real
65	; ; "تفصیلات کے مطابق شہر میں ڈکیتیوں کی شرح میں اضافہ ہوتا جارہا ہے اور پولیس جرائم روکنے میں ناکام دکھائی دیتی ہے۔ گزشتہ چند دنوں میں لوٹ مار کی کئی وارداتیں ہوئیں، 30 نومبر کو ڈاکوؤں نے نصیر آباد میں سگنل پر چوالیس لاکھ چھین کر موبائل کمپنی کے ملازم کو گولی مار دی تھی۔ نصیر آباد میں ہی 20 دسمبر کو فلپائنی خاتون کو ڈکیتی مزاحمت پر زخمی کر دیا گیا۔ گزشتہ روز البیراک کمپنی کے ملازمین سے گارڈن ٹاؤ…	real
66	; دوسری جانب ملزم نے الزام عائد کیا ہے کہ پولیو ورکرز نے خواتین کے بارے میں نازیبا الفاظ ادا کیے تھے جس کی وجہ سے تلخ کلامی ہوئی۔; "صوبائی دارالحکومت میں سخت سکیورٹی کے احکامات کے باوجود پولیو ٹیمیں غیر محفوظ، واقعہ شاد باغ کے علاقہ میں پیش آیا، جہاں پولیو ورکر لقمان ادریس نے اپنی والدہ فاطمہ کے ہمراہ دروازے پر دستک دی تو گھر کے باہر کھڑے نوجوان نے بچوں کو قطرے پلانے سے انکار کر دیا جس پر تلخ کلا…	real
67	; ; "تفصیلات کے مطابق تھانہ برکی پھلروان گاؤں میں جائیداد کے تنازع نے ہنستا بستا گھر اجاڑ دیا، لاٹھی گروپ نے شاترگروپ پر فائرنگ کردی جس کے نتیجے میں گولیاں لگنے سے ایک ہی خاندان کے 5 افراد جاں بحق ہوگئے، مقتولین میں قربان، ارشد اور بشیر نامی 3سگے بھائی بھی شامل ہیں۔مقتولین کے ورثا نے پنجاب اسمبلی کے باہر نعشیں رکھ کر دھرنا دیدیا کہتے ہیں کہ جب تک قاتلوں کو گرفتار نہیں کیا جاتا دھرنا جاری رہے گا۔"…	real
68	; "شام 5 بجے پیر مکی داتا دربارکے علاقے میں ہونے والی فائرنگ سے خوف وہراس پھیل گیا۔ نامعلوم افراد نے فائرنگ کرکے دو شہریوں کو موت کے گھاٹ اتار دیا جبکہ تین زخمیوں کو طبی امداد کیلئے ہسپتال منتقل کر دیا گیا۔دوسری جانب ورثاء بھی آپے سے باہر ہوگئے، لواحقین نے ٹائر جلا کر سڑک کو آمدورفت کیلئے بند کر دیا۔ مشتعل افراد نے سرکاری اور نجی املاک کو بھی نقصان پہنچایا۔ میٹرو بس سروس بند کرنے کے ساتھ ساتھ س…	real
69	; "پولیس اور فرانزک ٹیموں نے موقع سےشواہد اکٹھے کیے، جبکہ خاتون کی لاش پوسٹ مارٹم کے لیے مردہ خانے منتقل کردی۔"; "تفصیلات کے مطابق فیکٹری ایریا پنجاب سوسائٹی میں ملزم الہی بخش کا اپنی بیوی یاسمین سے جھگڑا ہوا، اس دوران طیش میں آکرالہی بخش نے فائرنگ کر دی، فائرنگ کے باعث یاسمین موقع پر ہی دم توڑ گئی، پولیس کا کہنا ہے کہ واقعہ جائیداد کے تنازعے پرپیش آیا، مقتولہ ملزم کی دوسری بیوی تھی۔"	real
70	; "قتل کی اس گھنائونی واردات کی سی سی ٹی وی فوٹیج بھی منظر عام پر آگئی جس میں دیکھا جا سکتا ہے کہ 2 ملزمان ہاتھ میں پستول لیے طاق لگائے بیٹھے رہے اسی دوران رضیہ بی بی جب قریب آئی تو اسے گولی مار دی گئی۔ ملزمان کو سی سی ٹی وی فوٹیج میں بھاگتے بھی دیکھا جاسکتا ہے، تاہم پولیس تاحال ملزمان کو گرفتار نہ کر سکی۔ پولیس کا کہنا تھا کہ ملزمان کی گرفتاری کے لیے ٹیم تشکیل دی جا چکی ہے اور جلد ملزمان کو گر…	real
71	; سٹی 42 نیوز ذرائع کے مطابق یونیورسٹی آف ویٹرنری اینڈ اینیمل سائنسز کے مطابق سپیشل برانچ کے کتے موسمی شدت کے باعث پارووہ بیماری میں مبتلا ہو رہے ہیں۔ یونیورسٹی کے مطابق ابتک چار کتے بیماری کے باعث دم توڑ چکے ہیں جبکہ باقی کتوں کو بچانے کے لیے حفاظتی اقدامات کرنے کی ضرورت ہے۔; "دوسری جانب سپیشل برانچ کے مطابق چند روز میں ہی پاروہ بیماری کے باعث چار لیبراڈور کتے دم توڑ گئے ہیں اور یہ وہ کتے تھے ج…	real
72	; پولیس کا کہنا ہے کہ طاہرہ کی اتوار کے روز بارات آنی تھی جب کہ گلبرگ کے رہائشی محمد بابر سے اس کی شادی طے پائی تھی تاہم ابھی واقعہ کی وجوہات سامنے نہیں آسکیں۔; "تفصیلات کے مطابق رائیونڈ کے علاقہ جیابگا کی رہائشی پچیس سالہ طاہرہ اپنی بہن شازیہ کے ہمراہ مہندی کی تقریب کے لئے تیار ہونے کے لئے بیوٹی پارلر جارہی تھی کہ اسی دوران نامعلوم موٹرسائیکل سواروں نے اس پر اندھا دھند فائرنگ کر دی، جس کے بعد …	real
73	; تفصیلات کے مطابق ساندہ کے علاقہ عمر سٹریٹ میں رشتے کے تنازعہ پر سگے ماموں نے 22سالہ عندلیب کو فائر نگ کر کے موت کے گھاٹ اتار دیا۔مقتولہ کی اپنی خالہ کے بیٹے سے منگنی طے ہو گئی تھی۔ شادی میں دس روز رہ گئے تھے لیکن ماموں نے رات گئے فائرنگ کر دی۔ چارگولیاں لگنے سے عندلیب موقع پر ہی جاں بحق ہو گئی۔	real
74	; یہ بھی ضرور پڑھیں:عسکری الیون میں تہرے قتل کی لرزہ خیز واردات; واضح رہے کہ پولیس نے شیراز کی موت کا معمہ حل کر نے کیلئے تحقیقات شروع کر دی ہیں۔ یاسمین کیخلاف مقدمہ درج لیا گیا ہے۔پولیس کے مطابق یاسمین کو جلد گرفتار کر لیا جائے گا۔ شیرا ز کی موت کے حقائق تفیش کے دوران ہی واضح ہوں گے۔; "یہ بھی پڑھیں:ن لیگ کی سابق ایم پی اے یاسمین خان کی پر اسرار ہلاکت، گھر سے نعش برآمد"; دوسری جانب شیراز کے اہل …	real
75	; "تفصیلات کے مطابق مناواں کے علاقہ دوگیچ گاؤں میں دو ماہ کے بچے کی ہلاکت پرپولیس نے بچے کی والدہ اور والد سمیت گھر کے پانچ افراد پر مقدمہ درج کر دیا جن میں بچے کا دادا اور دو چچا شامل ہیں۔ پولیس کے مطابق گھر والوں کی آپس کی لڑائی میں بچے کو نشانہ بنایا گیا جس کی وجہ سے اس کی موت ہوئی۔ دوسری جانب لواحقین کا کہنا تھا کہ والدین اپنے ہی لال کو بھلا کیسے قتل کر سکتے ہیں۔لواحقین کا کہنا تھا کہ مناواں…	real
76	; تفصیلات کے مطابق ڈیفنس اے پولیس سٹیشن میں پریس کانفرنس کرتے ہوئے ایس پی انویسٹی گیشن کینٹ ڈاکٹر انوش مسعود چودھری کا کہنا تھا کہ فیکٹری ایریا کے علاقے میں گھریلو جھگڑے پر بھابھی اور دوسری شادی کرنے پر سوتیلے باپ کو قتل کرنے والے ملزمان کو گرفتار کر لیا گیا۔; ایس پی انویسٹی گیشن کینٹ کا کہنا تھا کہ ڈولفن اہلکار عادل نے اپنے بھائی اور والدہ کے ساتھ ملکر بھابھی نبیلہ کو فائرنگ کر کے قتل کیا تھا۔ م…	real
77	; "لواحقین کے مطابق عمیر ذہنی طور پر معذور تھا اور اسے مرگی کے دورے پڑتے تھے، ڈولفن فورس کے اہلکاروں نے جان بوجھ کر فائرنگ کی "وزیر اعلیٰ پنجاب عثمان بزدار نے ڈولفن فورس کے اہلکار کی فائرنگ سے شہری کی ہلاکت کا نوٹس لے لیا۔""; ""گزشتہ روز نواں کوٹ کے علاقے میں ذہنی مریض عمیر نے چھریوں کے وار کر کے شہریوں کو زخمی کیا، اطلاع ملنے پر ڈولفن فورس موقع پر پہنچی جہاں ذہنی مریض نے چھری کے وار سے ڈولفن اہل…	real
78	; پولیس کے مطابق ملزم عمران بھٹی اور سلمان بھٹی نے رات کی تاریکی میں معمولی جھگڑے پر فائرنگ کر کے وسیم کو قتل کیا۔ پولیس کا کہنا ہے کہ ملزمان کی شناخت ہو چکی ہے جن کی گرفتاری کیلئے چھاپے مارے جا رہے ہیں۔; تفصیلات کے مطابق رائیونڈ کے علاقے میں گزشتہ روز وسیم اختر نامی نوجوان کی لاش برآمد ہوئی تھی جس کے ورثا کی جانب سے ملتان روڈ پر لاش رکھ کر احتجاجی مظاہرہ بھی کیا گیا۔ سٹی فورٹی ٹو کو موصول ہونیو…	real
79	; ; ستوکتلہ کے علاقے میں پراسرار طور پر لگنے والی آگ کے باعث چار افراد کی ہلاکت پر مقتولین کے ورثا نے چاروں افراد کی لاشیں گرین ٹاون کے علاقے مادرملت روڑ پر رکھ کر ٹائر نذر آتش کئے اور احتجاج شروع کر دیا۔; مظاہرین نے الزام عائد کیا کہ چاروں افراد کو قتل کر کے کمرے میں آگ لگائی گئی۔ پولیس کا کہنا ہے کہ مقتولین کے ورثا کی جانب سے تاحال کاروائی کروانے کے لئے درخواست موصول نہیں ہوئی درخواست موصول …	real
80	; "تفصیلات کے مطابق دوسری شادی کیوں کی ؟اس رنج میں ناحلف بیٹے نے اپنی جنت اپنے ہی ہاتھوں اجاڑ دی،باپ کیساتھ مل کر ماں اور اسکے دوسرے شوہر کو تشدد کے بعدموت کے گھاٹ اتار دیا۔راوی روڈ کی رہائشی سائرہ بی بی نے کچھ عرصہ قبل شہباز سے دوسری شادی کی،سائرہ کے بیٹے علی نے اسی رنجش پر والد ارشد کیساتھ مل کر اپنی ماں اور اسکے شوہر شہباز کو خنجر مار کر تشدد کرنے کے بعد فائرنگ کر کے قتل کردیا۔"	real
81	; تفصیلات کے مطابق ایڈیشنل سیشن جج عمران شفیع کی عدالت میں پولیس نے قدیر قتل کیس میں ملزم ملک امجد کو جیل سے لاکرعدالت میں پیش کیا گیا۔ ملزم جیسے ہی پیشی بھگت کر عدالت سے باہر نکلے تو سامنے بیٹھے مخالف فریق کے دو افراد نے ملزم پر فائرنگ کردی۔ فائرنگ کے نتیجے میں ملزم کو لانے والا ہیڈ کانسٹیبل آصف اقبال اور ملزم امجد گجر موقع پر ہی ہلاک ہوگئے۔ ملزم سےملاقات کے لیے آنے والد اوردوست احسن شدید زخمی…	real
82	; دوسری جانب سیشن عدالت میں نوجوان کے قتل کی سی سی ٹی وی فوٹیج بھی منظر عام پر آگئی ہے جس میں 2 مسلح افراد کو موٹرسائیکل پر آتےاور فائرنگ کرتے دیکھا جاسکتا۔; ; "تفصیلات کے مطابق سیشن کورٹ کے بابا گراؤنڈ گیٹ پر نامعلوم موٹر سائیکل سواروں نے پسند کی شادی کے کیس میں پیشی پر آئے نوجوان پر فائرنگ کردی اور فرار ہوگئے۔ گولیاں لگنے سے نوجوان موقع پر ہی دم توڑ گیا، پولیس نے مقتول کی نعش کو قبضہ میں لے …	real
83	; "تھانہ نشترکالونی کے علاقہ وینس سوسائٹی میں امان نامی نوجوان اپنے دوستوں سے ملنے گیا تو سیکیورٹی گارڈ نے بغیر کسی وجہ کے فائرنگ کردی، فوٹیج میں دیکھا جاسکتا ہے کہ امان اپنے دوستوں کے ساتھ کھڑا ہے کہ اچانک گارڈ نے فائرنگ کردی اور گولی سیدھی امان کے پیٹ مین لگی جس سے وہ شدیدذخمی ہوگیا اوراسکو ہسپتال منتقل کر دیا گیا، جہاں اسکی حالت تشویشناک ہے۔ پولیس کا کہنا ہےملزم کے خلاف اقدام قتل کا مقدمہ درج …	real
84	; "پولیس کے مطابق تقریباً ایک ماہ قبل ملک طاہر نامی شخص گھر سے اچانک غائب ہوگیا تھا اور 2 روز بعد اس کی نعش بلوکی ہیڈ کے قریب سے برآمد ہوئی تھی، پولیس نے تحقیقات کا آغاز کیا تو مقتول کے 2 دوستوں کو بھی شامل تفتیش کر لیا گیا۔"; "بعدازاں ملزمان ورثاء کے ساتھ مل کر مقتول کو ڈھونڈنے کا ڈرامہ بھی رچاتے رہے، پولیس نے بتایا کہ ساندہ کے رہائشی مقتول ملک طاہر کی نعش پانی میں بہہ گئی تھی جو بعد ازاں ہیڈ بل…	real
85	; "عدالت نے ریکارڈ کی پڑتال کے بعد دونوں کا11روز کا جسمانی ریمانڈ پولیس کو دے دیا، جبکہ پولیس نے پہلے سے گرفتار محمد اسلم عرف اچھا کا ریمانڈختم ہونے پر مزید4 روزکا ریمانڈ حاصل کرلیا۔ عدالت کو بتایا گیا کہ ملزم کا پولی ٹیسٹ کرانا ہے، اس کا ریمانڈ دیا جائے۔ تھانہ جوہرٹاون پولیس نےعمران شفیع کے قتل کیس میں مقدمہ درج کررکھا ہے۔"; "تفصیلات کے مطابق انسداد دہشت گردی کی خصوصی عدالت میں تھانہ جوہرٹاون پو…	real
86	; ; تفصیلات کے مطابق جیل روڈپر55 سالہ بزرگ شہری کویوٹرن میں غلط سائیڈ سے آنے پر ٹریفک وارڈن نے چالان کرنے کی بجائے تلخ کلامی پرتھپڑوں کی بارش کر دی لیکن بات یہاں ختم نہ ہوئی بلکہ ٹریفک وارڈنز کو مارتے دیکھ کرڈولفن فورس کے اہلکاروں نے بھی بغیروجہ پوچھے شہری کو مارنا شروع کردیا۔; بزرگ شہری سانس کے مرض میں مبتلا ہےاور سروسز اسپتال سے اپنا طبی معائنہ کروا کر واپس آ رہا تھا۔ جبکہ آئی جی پنجاب نے سی سی…	real
87	; "لڑکی کے اہلخانہ نے جنرل ہسپتال کے سامنے احتجاج کرتے ہوئے کہا کہ لڑکی خودکشی نہیں کر سکتی، اس کو قتل کیا گیا ہے، اعلیٰ حکام انصاف دلائیں۔"; "لاش کو پوسٹ مارٹم کے لیے مردہ خانے منتقل کر دیا گیا۔ پولیس کا کہنا ہے کہ پوسٹ مارٹم رپورٹ کے بعد اصل حقائق سامنے آئیں گے، ڈی آئی جی آپریشنز نے واقعے کا نوٹس لیتے ہوئے ایس پی ماڈل ٹاؤن اور ڈی ایس پی اچھرہ کو معاملے کی مکمل تحقیقات کا حکم دے دیا ہے۔"; "اہلخا…	real
88	; لٹن روڈ کے علاقے سے ملنے والی ماں بیٹی کی لاشوں کی شناخت 35 سالہ عائشہ اور 5 سالہ آمنہ کے نام سے ہوئی ہے۔ علاقہ مکینوں کے مطابق گلی میں بدبو پھیلنے پر پولیس کو اطلاع دی گئی تو گھر سے دونوں کی لاشیں برآمد ہوئیں جبکہ پولیس اور فرانزک ٹیموں نے پہنچ کر موقع سے شواہد اکھٹے کر لیے ہیں۔ لواحقین نے قتل کئے جانے کے خدشے کا اظہار کرتے ہوئے بتایا کہ بہن سے پانچ دن سے رابطہ نہیں ہوپا رہا تھا۔ مرنے والی خات…	real
89	; "تفصیلات کے مطابق گڑھی شاہو کراؤن پلازہ کے قریب کویت پلٹ شہری محمد عمر جوس کی دکان پر کھڑا تھا کہ اس دوران سول کپڑوں میں ملبوس سجاول نامی مبینہ پولیس اہلکار نے اسے مشکوک سمجھ کر تلاشی لینے کا مطالبہ کیا۔شہری کی جانب سے مزاحمت کرنے پر پولیس اہلکار نے پستول نکال کر مارنے کی دھمکیاں دی اور تشدد شروع کر دیا، پولیس اہلکار کے تشدد اور سر پر شدید چوٹیں آنے سے محمد عمر زندگی کی بازی ہار گیا۔"; پولیس اہ…	real
90	; "تفصیلات کے مطابق قلعہ گجر سنگھ کے علاقے میں نامعلوم افراد نے فائرنگ کر کے 32 سالہ ذیشان کو قتل کر دیا۔ حادثے کی اطلاع ملتے ہی پولیس جائے حادثہ پر پہنچ گئی اور مقتول کی لاش قبضے میں لے کر پوسٹ مارٹم کے لیے مردہ خانے منتقل کر دی، ذیشان کے ورثا نے تھانہ قلعہ گجر سنگھ میں ملزمان کے خلاف درخواست دائر کردی۔"; "پولیس کے مطابق معاملہ دیرینہ دشمنی کا ہے، مقتول کے جسم پر چھ گولیاں لگیں۔ فائرنگ کرنے کے ب…	real
91	; "پولیس نے ماں اور بچوں کی زہر کھا کر خودکشی یا قتل کے حوالے سے تفتیش شروع کر دی ۔ تفتیش کے مطابقعثمان نامی شہری کی دوسری بیوی تھی جس کو عثمان نے جیواپارک میں کرائے پر گھر لے کر رکھا ہوا تھا۔ پولیس کی ابتدائی تفتیش کے مطابق عثمان نے بتایا کہ دو روز قبل وہ اپنی بیوی اوربچوں کے ساتھ کھاناکھانے کے بعد انکو گھرمیں چھوڑ گیا تھا،جس کے بعد فون کیا توعائشہ نے فون اٹینڈ نہیں کیا، گھر کا دروازہ توڑ کر دیک…	real
92	; ایف آئی آر میں عائشہ کی والدہ نےموقف اختیارکیا ہے کہ عائشہ نےاسلام قبول کرکے3 سال قبل عثمان سے دوسری شادی کی تھی اورپہلی شادی میں عائشہ کے بچے بھی تھے جنکی وجہ سے دونوں میں لڑائی جھگڑارہتاتھا۔تفصیلات کے مطابق گرین ٹاؤن جیواپارک کے علاقہ میں ماں اور2بچوں کےقتل کامقدمہ درج کرلیا گیا ہے۔ مقدمہ 24سالہ عائشہ کی والدہ پروین کی مدعیت میں شوہرمحمدعثمان کیخلاف درج کیاگیا ہے۔	real
93	; پولیس کا کہنا ہے کہ ملزمان کی گرفتاری کے لئے چھاپے مارے جا رہے ہیں۔; تفصیلات کے مطابق پولیس کے مطابق گڑھی شاہو کے علاقے مین بازار کے رہائشی ندیم کا اپنے بھائی ولی کے ساتھ جائیداد کا تنازع چل رہا تھا۔ دونوں بھائیوں میں تلخ کلامی پر جھگڑا ہوا ندیم کی بیوی نے اشتعال انگیزی سے کام لیتے ہوئے ملزم کو چھری پکڑا دی جس پر ندیم نے اپنے بھائی ولی کو موت کے گھاٹ اتار دیا۔ واردات کے بعد ملزم بیوی بچوں کے ہم…	real
94	; "پولیس کے مطابق شاہدرہ کے علاقہ معراج پارک میں مقبول کا اپنی بیوی سے جھگڑا ہوا جس دوران مقبول کی بیوی نے مبینہ طور پر شوہر کے سر میں آہنی راڈ کے وار کر کے اسے موت کے گھاٹ اُتار دیا۔پولیس کا کہنا ہے کہ مقبول کی بیوی کو حراست میں لے کر کارروائی کی جا رہی ہے۔پولیس کے مطابق مقتول کے سر میں چوٹیں آنے کے باعث وہ موقع پر ہی جاں بحق ہو گیا، پولیس نے موقع سے شواہد اکٹھے کر کے مقتول کی لاش پوسٹ مارٹم کے …	real
95	; "مقتولہ عظمیٰ کاوالد عدالت کےباہر اپنی بیٹی کویادکرتےروتارہا،عظمیٰ کے والد محمد ریاض نے الزام عائد کیا کہ ان پر صلح کے لیے دباؤ ڈالا جا رہا ہے،ملزمان ہم پر صلح کے لیے پولیس کے ذریعے دباؤ ڈال رہے ہیں اور ہمیں پیسوں کے عوض کیس کو دبانے کا کہا جا رہا ہے۔"; "واضح رہے کہ مالکن کی بیٹی کی پلیٹ میں سے ایک لقمہ اُٹھانے پر سولہ سالہ عظمیٰ کو موت کی نیند سولادیا گیا، اور لاش کو بوری میں بند کرکے گندے نال…	real
96	; "دوسری جانب پولیس نےمقدمہ درج کرکےماہ رخ سمیت2افرادکوحراست میں لےلیا، جبکہ مزیدتحقیقات جاری ہیں۔"; "تفصیلات کے مطابق پوسٹمارٹم رپورٹ سےعیاں ہوگیا کہ گھریلو ملازمہ عظمیٰ کو سر پر بھاری چیز مار کر قتل کیا گیا،مقتولہ کے سینے پر بھی تشدد کے نشانات پائے گئے،اقبال ٹاؤن کےراوی بلاک سےلاپتہ ہونے والی گھریلو ملازمہ عظمیٰ کی لاش دو روز بعدنالے سے ملی،ورثاء نےشناخت کےبعدلاش بابوصابوانٹرچینج پررکھ کراحتجاج…	real
97	; "وزیراعلیٰ پنجاب سردار عثمان بزدار نے لاہور ائیر پورٹ پر فائرنگ کے واقعے کا نوٹس لیتے ہوئے سی سی پی او لاہور سے رپورٹ طلب کرلی،وزیراعلیٰ پنجاب کا کہنا ہے کہ فائرنگ کرنے والوں کیخلاف قانون کے تحت کارروائی کی جائے۔"; ; "ایس پی انویسٹی گیشن کینٹ کا کہنا ہے کہ مرنے والوں کی شناخت زین اور نفیس کے نام سے ہوئی،نفیس عمرہ کی سعادت حاصل کرکے لاہور واپس پہنچاتھا،نفیس پیپلز پارٹی کےرہنمابابربٹ قتل کیس میں …	real
98	; "نیشنلہوٹل انتظامیہ کا کہنا ہے کہ رات گئے شہری راشد کو بے ہوشی کی حالت میں ہسپتال منتقل کیا جہاں ڈاکٹروں نے اس کی موت کی تصدیق کر دی، پولیس نے ہوٹل میں پہنچ کر تمام شواہد اکٹھے کرنے کے بعد کمرے کو بند کردیا۔"; خبر پڑھیں۔۔ڈپٹی میئرز کو اختیارات دینے کی سمری سرد خانے کی نذر; یہ خبر پڑھیں۔۔مغلپورہ میں ڈکیتی مزاحمت پر 40 سالہ شخص قتل; ذرائع کا کہنا ہے کہ راشد خان نے مبینہ طور پر شراب پی رکھی تھی۔ ر…	real
99	; "ایمان فاطمہ قتل کیس میں جعلی پولیس مقابلے میں ملوث پولیس افسران کے حتمی بیانات انکوائری کیمیٹی نے قلمبند کرلیے ہیں۔ ذرائع کے مطابق مدثر کو پیچھے سے دوفائر مارے گئے جو کہ کمر سے لگ کر سینے کے پار ہو گئے۔ ایس ایچ او طارق بشیرچیمہ نے مدثر کو 2 گولیاں ماریں جبکہ ایس ایچ او یونس ڈوگر، ریاض عباس اورڈی ایس پی عارف رشید بھی موجود تھے۔ اس کیس میں ڈی این اے کروایا گیا اورنہ ہی مکمل تفتیش کی گئی۔ انکوائر…	real
100	; خبر ضرور پڑھیں۔۔۔میو ہسپتال میں لیڈی ڈاکٹر کی غفلت نے مریضہ کی جان لے لی; "یہ خبر پڑھیں۔۔۔بے حسی کی انتہا، سٹی ڈسٹرکٹ سکول شاہدرہ کی انتظامیہ نے طلبا کو مزدور بنا دیا"; "جمیل کے اہل خانہ کا کہنا تھا کہ عاصم اور بابر سے جمیل کی کوئی ذاتی دشمنی نہیں تھی، قاتلوں نے پہلے آ کر اس کی پھوپھی سے پوچھا کہ جمیل کہاں ہے اور جمیل کو دیکھتے ہی فائرنگ کر دی۔"; "سٹی 42 کے مطابق مصطفیٰ ٹاؤن کے علاقے کرامت کالو…	real
101	; خبر ضرور پڑھیں۔۔لاہوریوں کے سر سے بڑی بلا ٹل گئی; سٹی 42 کے مطابق قتل کا افسوسناک واقع مغلپورہ کے علاقے ریلوے کالونی میں پیش آیا جہاں معمولی جھگڑے کے دوران چھوٹے بھائی راحت نے اندھا دھند فائرنگ کر کے دو بڑے بھائیوں آصف اور راشد کو موت کے گھاٹ اتار دیا اور فرار ہو گیا۔; "یہ خبر پڑھیں۔۔لاہور پنجاب کا آلودہ ترین شہر بن گیا، ریڈ الرٹ جاری"; پولیس کے مطابق مقتول راشد 2 روز قبل بیرون ملک سے واپس آیا …	real
102	; پولیس کے مطابق نامزد ملزم رضوان عرف جگا اور رفیق کو گرفتار کر کے مقتول کے ماموں لطیف کی درخواست پر مقدمہ درج کرلیا گیا اور لاش پوسٹ مارٹم کیلئے بھجوا دی گئی۔; "پولیس کے مطابق شیخوپورہ کا رہائشی 15 سالہ احمد رحمان لاہور کے علاقے مناواں میں جوتوں کی فیکٹری میں مزدوری کرتا تھا اور قریبی ہوٹل میں رہتا تھا، ہوٹل کے مالک رضوان عرف جگا، محسن اور رفیق نے مبینہ طور پر اسے نشہ آور چیز کھلا کر تشدد کیا او…	real
103	; یہ خبر پڑھیں۔۔۔عسکری الیون میں تہرے قتل کی لرزہ خیز واردات; "تفصیلات کے مطابق جنوبی چھائونی کے علاقے میں رہائش پذیر یاسمین خان کی ہلاکت کا انکشاف تعفن پھیلنے پر ہوا، اہل علاقہ کی اطلاع پر پولیس گھر میں داخل ہوئی تو سابق ایم پی اے مردہ حالت میں پائی گئیں۔ پولیس نےنعش قبضہ میں لے کر پوسٹمارٹم کیلئے ہسپتال منتقل کر دی "پولیس اور فرانزک ٹیمیوں نے یاسمین خان کی پراسرار ہلاکت کا سراغ لگانے کے لیے جائ…	real
104	; ; "تفصیلات کے مطابق راوی روڈ، میٹرو سٹیشن بتی چوک کے قریب نا معلوم افراد نے راہگیروں پر فائرنگ کردی، جس کے نتیجہ میں 26 سالہ اختر موقع پر ہی جاں بحق ہوگیا، فائرنگ کے واقعہ میں 2 افراد زخمی بھی ہوئے، اطلاع ملتے ہی پولیس اور ریسکیو اہلکار جائے وقوعہ پر پہنچے، ریسکیو ذرائع کا کہنا تھا کہ زخمی اکبر اور تاج محمد کو میو ہسپتال منتقل کردیا گیا ہے۔"; "پولیس ذرائع کاکہناتھاکہ ملزمان چنگ چی رکشہ میں فائر…	real
105	; "تفصیلات کے مطابق نشتر کالونی میں اکیس سالہ صمد نے اپنی ماں مسرت اور سوتیلے باپ خالد کو فائرنگ کر کے ابدی نیند سلا دیا اور موقع سے فرار ہو گیا، حادثے کی اطلاع ملتے ہی پولیس جائے وقوعہ پر پہنچ گئی اور نعشیں قبضہ میں لے کر پوسٹمارٹم کیلئے مردہ خانے منتقل کردیں۔"	real
106	; پولیس کے مطابق واردات کے لیے حملہ آوروں نے نائن ایم ایم کا پستول استعمال کیا۔ مقتول کو چار گولیاں لگیں جن میں سے ایک سینے میں پیوست ہوئی۔ پروفیسر تنظیم اکبر کی لاش پوسٹ مارٹم کے بعد ورثاء کے حوالے کردی گئی ہے۔	real
107	; پولیس ذرائع کا کہنا ہے کہ ملزم شہباز سائیں عرصہ دراز سے بیرون ملک بیٹھ کر اپنا نیٹ ورک چلا رہا تھا اور ٹیپو ٹرکاں والا کے علاوہ بھی متعدد کیسز میں پولیس کو مطلوب تھا۔; "ذرائع کے مطابق پاکستان سے بھاگے ہوئے تین ملزمان کو دبئی سے گرفتار کیا گیا۔ ملزمان کی گرفتاری انٹرپول کے ذریعے عمل میں لائی گئی۔ گرفتار ملزمان میں شہباز سائیں، محسن اور فاروق شامل ہیں۔ شہباز سائیں 2010 میں امیرالدین عرف ٹیپو ٹرکا…	real
108	; "کاہنہ میں پولیس کانسٹیبل عدنان کی تشدد زدہ لاش نالے سے برآمد ہوئی۔برکی تھانہ میں کانسٹیبل عدنان کے اغوا کا مقدمہ نو فروری کو درج کروایا گیا تھا، اسکے بعد عدنان کی تشدد زدہ لاش کاہنہ میں سوئے اصل نالے سے برآمد ہوئی۔ پولیس نے لاش کو تحویل میں لے کر پوسٹمارٹم کیلئے مردہ خانے منتقل کر دیا ہے۔ پولیس کا کہنا ہے کہ پوسٹمارٹم رپورٹ سامنے آنے کے بعد موت کی حتمی وجوہات سامنے آئیں گی۔"	real
109	; سٹی42 کے مطابق برکی کے علاقے میں 14 اپریل کو سکول جاتی ہوئی 12 سالہ لڑکی لاپتہ ہوگئی تھی جس کی نعش آج کرباٹھ پل کے قریب نہر سے برآمد ہوئی ہے۔ پولیس نے بچی کی نعش تحویل میں لے کر ضروری کارروائی کیلئے مردہ خانے منتقل کر دی۔پولیس کے مطابق عروج کے گھر سے سکول چند قدم کے فاصلے پر ہے جبکہ جائے وقوعہ تقریباً پانچ کلومیٹر کے فاصلہ ہے۔ بچی کے جسم پر بظاہر تشدد کا کوئی نشان نہیں۔	real
110	; "کوٹ لکھپت کے علاقے مصطفیٰ کالونی کی رہائشی اٹھارہ سالہ عظمیٰ نے چند روز قبل ساجد سے پسند کی شادی کی، شادی کی رنجش پر عظمیٰ کے بھائیوں اظہر اور قاسم نے عظمیٰ پر کلہاڑیوں سے حملہ کر دیا، عظمی کو بچاتے ہوئے اسکی سوتن نورین بھی زخمی ہوگئی۔"; "اطلاع ملنے پر کوٹ لکھپت پولیس موقع پر پہنچ گئی اور ملزمان کو گرفتار کرلیا، دونوں زخمی خواتین کو جنرل ہسپتال منتقل کیا گیا جہاں عظمیٰ زخموں کی تاب نہ لاتے ہوئ…	real
111	; "ایس پی سی آئی اے ندیم عباس کے مطابق ملزم نے دو ہزار تیرہ میں دوہرے قتل کی واردات کی جسے پانچ سال بعد سی آئی اے اقبال ٹاون نے گرفتار کیا، جبکہ اشتہاری فریاد کے ساتھی ملزمان افضال اور عتیق بھی اشتہاری اور مفرور ہیں جن کی گرفتاری کے لئے ریڈ کئے جا رہے ہیں۔"; "ایس پی سی آئی اے ندیم عباس کے مطابق ملزم فریاد نے اپنے ساتھیوں سمیت شیخوپورہ پولیس کے ہیڈ کانسٹیبل ذوالفقار کو گھات لگا کراندھا دھند فائ…	real
112	; "تفصیلات کے مطابق شادمان میں واقع ملٹی نیشنل فاسٹ فوڈ چین میں ڈکیتی کی واردات ہوئی، سٹی فورٹی ٹو کو حاصل ہونے والی سی سی ٹی وی میں دیکھا جا سکتا ہے کہ موٹرسائیکل سوار دو ڈاکو اسلحہ لہراتے فوڈ پوائنٹ میں داخل ہوئے، جنہوں نے گن پوائنٹ پر عملے کو یرغمال بنایا اور لوٹ مار شروع کر دی۔"	real
113	; "تفصیلات کے مطابق لاہور کی ایک نجی مارکیٹ میں رات گئے ڈکیتی کی واردات ہوئی، ڈاکو دکاندار کو ڈراتے اور دھمکاتے رہے جبکہ دکاندار کے مطابق سارا نقدی سامان لوٹنے کے بعد ڈاکوں نے دکاندار کے پرس میں پولیس کارڈ دیکھا تو دیکھنے کے بعد ڈاکوں نے لوٹا ہوا سارا سامان دکاندار کو واپس کر دیا۔"	real
114	; پولیس ڈاکوؤں کامکمل خاتمہ نہ کرسکی جس کی وجہ سے شہریوں سے لوٹ مارکاسلسلہ بھی نہ رک سکا۔ اتوار اورپیر کی درمیانی شب مختلف علاقوں میں شہری جرائم پیشہ عناصر کے ہاتھوں نقدی اورقیمتی اشیاء سے محروم ہوگئے۔ سٹی ڈسٹرکٹ گورنمنٹ شاہدرہ دفترمیں موٹرسائیکل سوار ڈاکوؤں نے عملے کویرغمال بناکر ان سے نوے ہزار روپے نقدی اورموبائل فون لوٹ لیا۔; دوسری واردات یتیم خانہ چوک میں شہری ایازکے ساتھ ہوئی جس میں ڈاکوؤں ن…	real
115	; "تفصیلات کے مطابق کاہنہ کے علاقہ خانوہارنی میں ڈکیتی مزاحمت پر پانچ بچوں کی ماں کو قتل کر دیا گیا، ڈاکو موقع سے نقدی اور سونا لے کر چلتے بنے،لواحقین کے مطابق مقتولہ سمیرا پروین اپنے خاوند شہزاد کے ہمراہ گھر واپس آرہی تھی کہ تھانہ کاہنہ کی حدود میں دو مسلح ڈاکو ٔں نے گن پوائنٹ پر میاں بیوی سے 76 ہزار روپے چھین لیے،مزاحمت کرنے پر خاتون کو گولی مار کر فرار ہوگئے،فائرنگ کے باعث پروین موقع پر جاں بح…	real
116	; سٹی 42 کے مطابق واردات رات گئے کھوکھر ٹاؤن مین روڈ پر واقع موبائل شاپ پر کی گئی۔ دو ڈاکو ڈکیتی کے بعد فرار ہونے کی کوشش میں تھے کہ ڈولفن پولیس نےدوران گشت مشکوک حرکات پر ڈاکوؤں کو دھرلیا۔ تلاشی کے دوران ڈاکوؤں سے پستول برآمد ہوا۔مزاحمت پر ایک ڈاکو شدید زخمی ہو گیاجسے میو ہسپتال منتقل کیا گیا۔ بعد ازاں ڈاکو کو تھانہ شفیق آباد بھیج دیا گیا۔	real
117	; "اقبال ٹاون راوی بلاک میں ڈاکووں نے شہری سےگن پوائنٹ پر موٹر سائیکل چھینی، ڈاکو اسی موٹر سائیکل پر مزید دووارداتیں کر نے کے بعد فرار ہو رہے تھے، اس دوران ڈولفن سکواڈ کے اہلکاروں نے انہیں راوی بلاک میں روک لیا ، پولیس کو دیکھتے ہی ڈاکووں نے فائرنگ شروع کر دی ، اہلکاروں کی جوابی فائرنگ سے ایک ڈاکوسیموئیل زخمی ہو گیا ۔"; "یہ بھی پڑھیں: خان صاحب کی ساری تقریر کا متن صرف ""میں"" تھا: شہباز شریف"; عی…	real
118	; "پولیس کے مطابق شاہدرہ کے علاقے میں کارروائی کرتے ہوئے چار مفرور اشتہاریوں اعظم، ناصر، طارق اور دلاور کو گرفتار کیا گیا، ملزمان کے قبضے سے چھ ناجائز پسٹل اور چوری شدہ لاکھوں روپے نقدی بھی برآمد کی گئی۔"	real
119	; "تفصیلات کے مطابق ڈیفنس اے میں واقع ایم سی بی بینک میں نقب زنی کی واردات ہوئی۔ دیوار پھاڑ کر ڈاکو بینک میں داخل ہوئے اور لاکر توڑکر لوٹ مار کی، دوران مزاحمت ڈاکوؤں نےگارڈ ساجد کو قتل کر دیا۔ ساجد صبح گھر نہیں گیا تواہل خانہ تلاش کرنے کیلئے بینک آ پہنچے، بینک کی عمارت کواندرسے تالے لگے ہوئے تھے۔ بینک انتظامیہ نے تالے توڑے تو ساجد کی تشدد زدہ لاش ٹرنک سے برآمد ہوئی۔"; "اہل خانہ کا کہنا ہے کہ ساجد…	real
120	; یاد رہے اس واقعہ سے قبل بھی وی وی آئی پیز کے ساتھ سیکیورٹی کرنے والے کئی نشئی اہلکار تعینات کیے گئے تھے۔; نواب ٹاؤن کے علاقہ میں گزشتہ رات دو باوردی اہلکاروں نے ناکہ لگا کر موٹرسائیکل پر شہری احسن رضا سے 13 ہزار روپے لوٹے اور فرار ہو گئے۔ شہری احسن نے فوری پولیس ایمرجنسی ون فائیو پر کال کر دی جس پر ڈولفن سکواڈ نے دونوں ڈاکو پولیس اہلکاروں کو تعاقب کرکے گرفتار کر لیا۔; "پولیس کے مطابق گرفتار پول…	real
121	; "ایس پی ڈولفن بلال ظفر کا کہنا تھا کہ ملزم اس سے قبل بھی ڈکیتی کی متعدد وارداتیں کرچکا ہے جبکہ ملزم سے مال مسروقہ، اسلحہ اور موبائل فون برآمد کر لیا گیا ہے۔"; تفصیلات کے مطابق مصطٰفی آباد کے علاقے میں شہری اے ٹی ایم مشین سے پیسے نکال رہا تھا کہ اچانک ایک ڈاکو اے ٹی ایم بوتھ میں داخل ہوا اور شہری سے لوٹ مار کرنے لگا۔ شہری کے شور مچانے پر ڈولفن اہلکاروں نے موقع پر پہنچ کر ڈکیتی کی واردات کو ناک…	real
122	; "تفصیلات کے مطابق کاہنہ پولیس نے علاقے میں کارروائی کرکے فیصل عرف بلا ڈکیت گینگ کے سرغنہ فیصل عرف بلا کو ساتھیوں سمیت گرفتار کر لیا، گرفتار ملزمان میں بوٹا، محسن اور ذیشان شامل ہیں۔ پولیس کا کہنا تھا کہ ملزمان کے خلاف شہر بھر میں چوری و ڈکیتی کے 12 مقدمات درج ہیں، مخبر کی خبر پر پولیس نے کاہنہ کے علاقے میں چھاپہ مارا جہاں چاروں ملزمان کو گرفتار کیا گیا، ملزمان کے قبضے سے 4 چوری شدہ موٹر سائیکلی…	real
123	; مزید جاننے کیلئے ویڈیو دیکھیں; "دوسری جانب پولیس کا کہنا ہے کہ فائرنگ کرکے فرار ہونے والے ڈاکوؤں کی تلاش کیلئے جگہ جگہ چھاپے مارے جا رہے ہیں، اُنہیں جلد گرفتار کرلیا جائے گا۔"; "تفصیلات کے مطابق بند روڈ ناکے پر دوران چیکنگ ڈاکوؤں نے فائرنگ کر دی جس کے نتیجے میں گولی لگنے سے ڈولفن فورس کا اہلکار زخمی ہوگیا، جسے طبی امداد کیلئے میاں منشی ہسپتال منتقل کردیا گیا، ڈاکٹروں کا کہنا ہے کہ ڈولفن اہلکار …	real
124	; "پنجاب پولیس نے انوکھے کام ، قوت سماعت اور معذور افراد کو بھی نہ بخشا اور چوری کامقدمہ درج کردیا۔محمداقبال اورغلام رسول ضمانت کرانےلاہورہائیکورٹ پہنچ گئے۔جسٹس عالیہ نیلم نےدرخواست ضمانت پرسماعت کی۔"; "ملزموں کا کہنا تھا کہ پولیس نےمخالفین کےکہنےپرچوری ڈکیتی،دیگرمقدمہ پرنامزدکردیا۔"; "یہ بھی پڑھیں: ججز کی کمی، کرپشن کے سینکڑوں کیسز التوا کا شکار"	real
125	; 19 ہزار سے زائد کیسز میں فرانزک ایکسپرٹس کو بلانا گوارہ نہ کیا گیا جس سے کرائم سین پر موجود شواہد ضائع ہوگئے اور اسی بنا پر سینکڑوں ملزمان کو تاحال پولیس ٹریس ہی نہ کر پائی کیونکہ کرائم سین سے کسی ملزم کے فنگر پرنٹس اور دیگر شواہد اکٹھے ہی نہیں کیے گئے تھے۔; "قواعد ضوابط کے مطابق کسی بھی جگہ جب جرم سرزد ہوتا ہے تو موقع پر پہنچنے والی پولیس نے کرائم سین سے شواہد اکٹھے کرنے کے لیے فرانزک ایکسپرٹس…	real
126	; دوسری جانب پولیس کا کہنا ہے کہ مقدمہ درج کر کے ملزمان کی تلاش جاری ہے; سٹی42 نے واردات کی فوٹیج حاصل کر لی۔ فوٹیج میں دیکھاجاسکتاہے کہ ایک ڈاکو لوٹتا رہا جب کہ دوسرا نقاب پہن کرہوائی فائرنگ کرتارہا۔ اس دوران عام شہری قریب سے گزرتے رہے لیکن کسی نے کوئی مزاحمت نہیں کی۔; "تفصیلات کے مطابق تھانہ گجرپورہ کی حدود کوٹ خواجہ سعید میں دن دیہاڑے ڈکیتی کی واردات ہوئی۔ ڈاکوؤں نے حافظ زاہد اور اس کے اہل خان…	real
127	; "تفصیلات کے مطابق رائیونڈ کے علاقے میں ڈاکو بے لگام ہو گئے، ریلوے کالونی میں دن دیہاڑے موٹرسائیکل سوار تین ڈاکووں نے شہری کو گھر کی دہلیز پر ہی لوٹ لیا۔ سٹی فورٹی ٹو کو موصول ہونیوالی سی سی ٹی وی فوٹیج میں دیکھا جا سکتا ہے کہ شہری اپنے گھر کی دہلیز پر موٹرسائیکل کھڑی کرتا ہے جبکہ اسی دوران موٹرسائیکل سوار ڈاکو گن پوائنٹ پر اسے یرغمال بنا لیتے ہیں اور لوٹ مار کرتے ہوئے پچاس ہزار نقدی لوٹ کر فرار…	real
128	; پولیس نے ڈکیتی مزاحمت اور دیرینہ دشمنی سمیت تمام پہلووں پر تحقیقات شروع کر دی ہیں۔ اہلخانہ کے مطابق فہد بےروزگار تھا اور ان کی کسی کے ساتھ کوئی دشمنی نہیں ہے۔; "ذرائع کے مطابق پولیس کے مطابق ساندہ کے علاقے دھوپ سڑی کے رہائشی محنت کش اشرف کا تیس سالہ بیٹا فہد گھر کے باہر کھڑا تھا کہ نامعلوم افراد اس پرفائرنگ کرکے فرار ہو گئے۔ گولیوں کی آواز سن کر محلے دار باہر نکلے تو فہد شدید زخمی حالت میں پڑا …	real
129	; پولیس کا کہنا ہے کہ سی سی ٹی وی فوٹیج کی مدد سے ملزمان کو تلاش کیا جائے گا۔; تفصیلات کے مطابق دن دیہاڑے دو ڈاکو سٹور میں داخل ہو کر لوٹ مار کرتے رہے۔ ڈاکوؤں نے دکان پر آنے والی گاہکوں کو یرغمال بنا لیا اور لوٹ مار کرتے رہے۔ ایک ڈاکو پستول دکھا کر سب کو دھمکیاں دیتا رہا جبکہ دوسرا کارروائی میں مصروف رہا۔ ڈاکو ہزاروں روپے نقدی اور دیگر قیمتی سامان لے کر فرار ہو گئے۔;	real
130	; "سٹور کا مالک گاہکوں کے انتظار میں اخبارپڑھ رہا تھا، جسے شاید یہ معلوم نہیں تھا کہ چند لمحے پراس کی دکان ہی خبر بن جائے گی۔ چند سیکنڈ بعد ایک ڈاکو ہاتھ میں پستول تانے اس کے سامنے آکر کھڑا ہوگیا، جس کے بعد اس کا ساتھی ڈاکو ہیلمٹ پہن کرسٹور میں داخل ہوا، اور قیمتی سامان لوٹ کر فرار ہو گئے۔تفصیلات کے مطابق دن کی روشنی میں پکڑے جانے کاڈر، نہ قانون کاخوف، سبزہ زارمیں واقع ایک یوٹیلٹی سٹورپردن دیہاڑ…	real
131	; دوسری جانب ڈی آئی جی آپریشنز وقاص نذیر نے ستوکتلہ میں بینک ڈکیتی کی کوشش ناکام بنانے والے بہادر نوجوانوں کیلئے انعام کا اعلان کردیا۔; "تفصیلات کے مطابق ستوکتلہ میں ڈولفن اور پیرو فورس نے بروقت کارروائی کرتے ہوئے بینک کو لوٹنے سے بچالیا اور موقع سے چار ملزمان کو گرفتار کرلیا جن کے قبضے سے کروڑوں روپے مالیت کی کرنسی، 20 کلو سے زائد سونے کے زیورات برآمد ہوئے ہیں، ملزمان کو مزید تفتیش کیلئے پولی…	real
132	; اسلم کے بیانات میں تضادکی وجہ سے پولیس نے اسے حراست میں لے لیا ۔جبکہ اسلم کا کہنا تھا کہ وہ مختلف ڈیپارٹمنٹل سٹورز میں گوشت کی سپلائی کا کام کرتا تھا اور اسی کے لیے وہ بینک سے پیسے لے کر آرہا تھا کہ راستے میں ڈاکوئوں نے لوٹ لیا۔شمالی چھائونی کے علاقے میں اسلم نامی شہری بھٹہ چوک میں بینک سے پینتیس لاکھ روپے لے کر جا رہا تھا کہ بھٹہ چوک کے قریب ہی دو موٹر سائیکل سوار ڈاکوئوں نے گن پوائنٹ پر اسلم…	real
133	; "وحدت کالونی میں رہائشیوں کے بعد دکاندار بھی غیر محفوظ ہونے لگے ہیں، وحدت کالونی کے علاقے رحمان پورہ میں واقع سٹی بک شاپ کے مالک محمد کلیم کے مطابق وہ اپنی دکان میں موجود تھا کہ اسی دوران موٹرسائیکل سوار 2 ڈاکوؤں نے گن پوائنٹ پر یرغمال بنا کر لوٹ مار شروع کر دی۔ ڈاکو لوٹ مار کرتے ہوئے بیس ہزار نقدی لے کر فرار ہو گئے، سٹی فورٹی ٹو کو موصول ہونے والی سی سی ٹی وی فوٹیج میں ایک ڈاکو کا چہرہ دیکھا ج…	real
134	; "تفصیلات کے مطابق شہر میں جہاں شہری ڈاکوؤں اور چوروں کی لوٹ مار کا شکار ہو رہے ہیں وہیں اب بیٹری چوروں نے بھی شہریوں کی مشکلات میں اضافہ کر دیا ہے۔ گجر پورہ میں ایک ہی جگہ سے اب تک دس گاڑیوں کی بیٹریاں چوری ہو چکی ہیں، سی سی ٹی وی فوٹیج میں چوروں کو گاڑیوں سے بیٹریاں چوری کرتے دیکھا جا سکتا ہے۔"; "پولیس نے تاحال کسی ایک بھی واقعہ کا مقدمہ درج نہیں کیا، پولیس کا کہنا ہے کہ واقعات کی تحقیقات جا …	real
135	; تفصیلات کے مطابق نشتر کالونی میں 9 اگست کی صبح شہری اسلم اپنی فیکٹری سے 60 لاکھ روپے کی رقم بینک میں جمع کروانے کے لیے جا رہا تھا کہ اسی دوران جب وہ نشتر کالونی مین بازار کے قریب پہنچا تو دو موٹر سائیکل سوار ڈاکووں نے اسے اسلحہ کی نوک پر روک لیا ۔ ڈاکووں کا ایک ساتھی موٹر سائیکل سے اترا اور ڈرائیور کے سر پر بندوق تان لی۔	real
136	; "موٹرسائیکل سوار ڈاکو نے ہیلمٹ پہن رکھا ہے جو کہ لوٹ مار کرتا ہوا 60ہزار نقدی اور موبائل فونز لوٹ کر فرار ہو گیا،پولیس کی جانب سے واردات کا مقدمہ درج کر لیا گیا مگر سی سی ٹی وی کے باوجود ملزم کا سراغ نہیں لگ سکا۔"; "تفصیلات کے مطابق سٹی ڈویژن کے مختلف علاقوں میں ڈکیتی و چوری کی وارداتیں بڑھنے لگی ہیں،شادباغ کے علاقے میں بھی ایسی ہی واردات سامنے آئی جہاں موٹرسائیکل سوار ڈاکو نے شہری آصف کو گھر…	real
137	; تفصیلات کے مطابق دونقاب پوش مسلح ڈاکو بیکری میں گھس کر لوٹ مارکی ۔ ایک ڈاکو اسلحہ کے زور پر شہریوں کو ڈرا دھمکا یا اور دوسرا ڈاکو کیش کاؤنٹر سے پیسے اکٹھے کرنے میں مصروف رہا۔ ڈاکوؤں نے بیکری میں موجود ٹیلی فون توڑا اور کائونٹر پر موجود اشیاء بھی پھینکیں۔; دونوں ڈاکو ہزاروں کی نقدی لوٹ کر بلا خوف و خطر فرار ہو گئے۔ بیکری انتظامیہ کا کہنا تھا کہ واردات کی سی سی ٹی وی فوٹیج پولیس کو فراہم کی گئی م…	real
138	; "تفصیلات کے مطابق فیصل ٹاؤن میں خاتون کے ساتھ راہزنی کی واردات ہوئی جبکہ سٹی فورٹی ٹو نے واردات کی سی سی ٹی وی فوٹیج حاصل کر لی۔واردات گزشتہ روزخاتون قراۃ العین حیدر کے ساتھ ایم بلاک ماڈل ٹاؤن میں ہوئی جبکہ سی سی ٹی وی فوٹیج میں موٹرسائیکل سوار 2 ملزموں کو دیکھا جا سکتا ہے۔موٹرسائیکل پر بیٹھا پچھلا ملزم خاتون سے بیگ چھینتے دکھائی دیتا ہے۔ متاثرہ خاتون کے مطابق بیگ میں 45 ہزار سے زائد نقدی، اہم …	real
139	; دوسری جانب ایس پی ڈولفن کا کہنا ہے کہ ڈولفن اہلکار کو معطل کر دیا گیا ہے جس کے خلاف کڑی کارروائی کرنے کے احکامات دئیے گئے ہیں۔; تفصیلات کے مطابق ڈولفن فورس کا اہلکار جاوید وٹو اپنے ساتھی کے ساتھ کوٹ لکھپت کے علاقے میں شہری کے ساتھ ڈکیتی کی واردات کر رہا تھا جہاں ملزمان نے مزاحمت کرنے پر فائرنگ کر کے شہری کو زخمی کر دیا جبکہ موقع پر موجود علاقہ مکینوں نے ڈولفن اہلکار اور اس کے ساتھی کو دبوچ لیا …	real
140	; "لاہور سے چونیاں جانے والی کوسٹر میں تین مسلح ڈاکو مسافروں کے روپ میں ٹھوکر نیاز بیگ سے سوار ہوئے جنہوں نے مانگا منڈی کے علاقے میں پہنچ کر مسافروں اور بس عملے کو یرغمال بنا لیا اور لوٹ مار شروع کر دی، ڈاکو مسافروں کو یرغمال بناتے ہوئے بیس سے زائد مسافروں سے لاکھوں مالیت کے زیورات، نقدی اور موبائل فونز سمیت دیگر قیمتی سامان لوٹ کر ملتان روڈ پر فرار ہو گئے۔ڈی ایس پی رائیونڈ نوید اکمل کا کہنا ہے ک…	real
141	; "پولیس کا کہنا ہے کہ سر میں گولی لگنے سے چالیس سالہ شخص جاں بحق ہوا، موقع سے شواہد اکٹھے کر کے مقتول کی لاش پوسٹ مارٹم کے لئے مردہ خانے منتقل کر دی ہے۔"; یہ خبر بھی پڑھیں۔۔۔ڈپٹی میئرز کو اختیارات دینے کی سمری سرد خانے کی نذر; "خبر پڑھیں۔۔۔مغلپورہ میں خون سفید ہوگیا، چھوٹے بھائی نے دو بڑے بھائیوں کی جان لے لی"; دوسری جانب لکشمی چوک ہوٹل کے کمرے سے 45 سالہ شخص کی لاش برآمد ہوئی ہے جسے پولیس نے ت…	real
142	; "جبکہ کینٹ ڈویژن 673 موٹرسائیکوں کی چوری کے باعث تیسرے ،ماڈل ٹاؤن 617 کے ساتھ چوتھے،481 کے ساتھ اقبال ٹاون پانچویں اور 388وارداتوں کے ساتھ سول لائن چھٹے نمبر پر رہا۔"; صدر ڈویژن رواں برس چوروں اور ڈاکووں کی توجہ کا مرکز رہا۔ جہاں سے 901 موٹرسائیکلیں چوری ہوئیں ۔ جبکہ 70 گن پوائنٹ پر چھین لی گئیں۔ سٹی ڈویژن دوسرے نمبر پر لوٹ مار کا ٹارگٹ رہا۔ جہاں پر895 موٹرسائیکلیں چوری ہوئیں اور 77موٹرسائیکلی…	real
143	; دوسر جانب ستوکتلہ میں ال رحیم سٹور میں برقعہ پوش ڈاکو لوٹ مار کرکے4 لاکھ روپے نقدی اوردکاندارکا پرس بھی لوٹ کر فرار ہو گئے۔ سٹور کے مالک عبدالرحیم کا کہنا تھاکہ دو مہینے میں دوسری واردات ہے۔ سی سی ٹی وی کے باوجود پولیس ملزمان کو نہیں پکڑ سکی۔; ; تفصیلات کے مطابق نئے سال کے آغاز میں ہی شہر میں لوٹ مار کا بازار گرم۔ فیصل ٹاون میں دن دیہاڑے میڈیکل سٹورپردومسلح ڈاکولوٹ مار کر کے8 لاکھ چھین کر فرارہ…	real
144	; تفصیلات کے مطابق اسلامپورہ کے علاقے افغان کالونی میں چارمسلح ڈاکوؤں نے دوران لوٹ مار مزاحمت کرنے پر فائرنگ کر دی۔ فائرنگ سے اٹھارہ سالہ نوجان شریف اللہ موقع پر ہی جاں بحق ہو گیا۔اہل خانہ کا کہنا ہے کہ چار ڈاکو دیوار سے چھلانگ لگا کر گھر میں داخل ہوئے اور لوٹ مار شروع کر دی۔ خاتون کو بھی پسٹل کا بٹ مارا اور مزاحمت کرنے پر فائرنگ کر دی جس سے شریف اللہ جاں بحق ہو گیا۔; پولیس کا کہنا ہے کہ تفتیش ک…	real
145	; "پولیس نے جائے وقوعہ سے شواہد اکھٹے کر کے تحقیقات کا آغاز کر دیا ہے۔تفصیلات کے مطابق اقبال ٹاؤن میں پانچ نقاب پوش ڈاکو تاجر حاجی محمد طفیل کے گھر داخل ہوئے اور اہل خانہ کو یرغمال بنا کر پچیس لاکھ کیش ، پینتالیس85 تولہ سونا، 3 ہزار ڈالر اور دس لاکھ روپے کی غیر ملکی کرنسی لوٹ کر موقع سے فرار ہو گئے۔ ڈاکو جاتے جاتے سیکیورٹی کیمرز بھی اتار کر لے گئے۔"	real
146	; "پڑھنا مت بھولئے: نواب ٹاؤن:الیکٹرک سٹور میں ڈکیتی کی واردات، سٹی42 نے فوٹیج حاصل کر لی"; "آئی جی پنجاب نے احکامت جاری کیے ہے کہ اہلکاروں کےایڈز، ہیپاٹائٹس بی اورسی کے ٹیسٹ کے پرائمری اینڈ سیکنڈری ہیلتھ کے تعاون سے کروائےجائیں۔ اورجن اہلکاروں کی ٹیسٹ مثبت آئے ان اہلکاروں کےمتعلقہ ڈسٹرکٹ ہسپتال سے ہیلتھ کارڈزبنوائیں جائیں تاکہ وہ وہاں سے اپنا خصوصی علاج کروائیں جسکے لیے محکمہ ہیلتھ سے معاہدہ ہو…	real
147	; ; "تفصیلات کے مطابق موٹر سائیکل سوار ڈاکوؤں نے شہری کو گن پوائنٹ پر لوٹ لیا۔ ڈاکو شہری سے موبائل فون، موٹر سائیکل، 30 ہزار نقدی اور لاکھوں روپے مالیت کے طلائی زیورات لوٹ کر فرار ہو گئے۔ پولیس تاحال کارروائی کرنے سے گریزاں ہے۔"	real
148	; "سیف سٹی کے کیمروں سے مانیٹرنگ ،ڈولفن اور پیرو فورس کی پٹرولنگ، سب کے سب وارداتیں روکنے میں ناکام ہوگئے۔ جوہر ٹاؤن میں شوروم مالک دانش کو پرس اور قیمتی موبائل فون سے محرم کر دیا گیا۔ فوٹیج میں صاف طور پر دیکھا جا سکتا ہے کہ واردات سے پہلے دوموٹر سائیکل سوار ارد گرد کے ماحول کا جائزہ لیتے ہیں، پھر دونوں گاڑی کے قریب آکر رکتے ہیں۔ ایک نوجوان گاڑی کا دروازہ کھول کرچھینا جھپٹی کرتا اور پہلے سے ہی …	real
149	; تفصیلات کے مطابق ڈاکو کو روکنے کیلئےایک شہری نےپتھر پھینکا تو ڈاکو نے گولی چلادی۔ گولی خوش قسمتی سےشہری کےقریب سےگزرگئ۔ شہریوں نےڈکیتی کوناکام بنانےکی کوشش کی تاہم ڈاکو لوٹ مار کرتا رہا۔	real
150	; اچھرہ خادم پکوان سنٹر کے سامنے سے دو ماہ میں چوری کی چوتھی واردات ہے۔ سی سی ٹی وی فوٹیج میں چور کا چہرہ واضح طور پر دیکھا جا سکتا جو بعد میں موٹرسائیکل پر فرار ہوجاتا ہے۔ اچھرہ پولیس کسی بھی قسم کی کاروائی سے گریزاں ہے۔ چوری کی وارداتوں سے شہری پریشان ہیں۔	real
151	; "لاہور پولیس جرائم کنٹرول کرنے میں ناکام ہوگئی، تھانہ غازی آباد کے علاقہ تاج باغ میں چوروں نے گھر کی کھڑکی اور دروازے کا تالہ توڑ کر واردات کی، چور شفیق نامی شہری کے گھر سے 25 تولے سونا اور 4 لاکھ نقدی لے کر فرار ہوگئے،متاثرہ شہری نے ملزمان کے خلاف مقدمہ کے اندراج کے لئے درخواست دے دی ہے،پولیس نے چوروں کی تلاش شروع کر دی ہے مگر ابھی تک کو ئی سراغ نہیں ملا ۔اہل علاقہ کا کہنا تھا کہ اس واقعہ سے پ…	real
152	; https://www.youtube.com/channel/UCdTup4kK7Ze08KYp7ReiuMw; "ڈاکو گن پوائنٹ پر فیملی کو یرغمال بنا کر لاکھوں مالیت کے زیورات، نقدی اور موبائل فون لوٹ کر فرار ہو گئے جب کہ واقعہ کی اطلاع کے باوجود پولیس تاخیر سے پہنچی، پولیس نے موقع پر پہنچ کر روایتی کارروائی کرتے ہوئے مقدمہ درج کر لیا جب کہ سی سی ٹی وی کے باوجود ملزمان کا سراغ نہ لگایا جا سکا۔"; لاہور میں اور کیا کچھ ہو رہا ہے ؟ جاننے کیلئے لنک پ…	real
153	; دونوں ڈاکوؤں نے دکان کے کیش کائونٹر سے اڑھائی لاکھ رقم لوٹی اور واردات کر کے فرار ہو گئے۔ پولیس کا کہنا ہے کہ واردات کا مقدمہ ڈکیتی دفعات کے تحت دکان مالک عثمان کی مدعیت میں تھانہ ستوکتلہ میں درج کر دیا گیا ہے۔سی سی ٹی وی فوٹیج میں اسلحہ بردار دو ڈاکوؤں کو رومال سے منہ چھپائے دکان میں داخل ہوتے دیکھا جاسکتا ہے۔ فوٹیج کے مطابق ڈاکوئوں نے دکان کے عملے کو اسلحہ کے زور پر یرغمال بنایا اور ڈکیتی م…	real
154	; "سی آئی اے سول لائن اور سی آئی اے اقبال ٹاﺅن نے کاروائی کرتے ہوئے ڈکیتی رابری کے مقدمات میں انتہائی مطلوب 5مجرمان اشتہاری ۔عثمان ،عرفان، محمد اقبال،محمد افتخار اور ظہیر عباس کوگرفتارکیا۔مجرمان اشتہاری ڈکیتی /رابری کے متعدد مقدمات میں مطلوب تھے جن کو جدید ٹیکنالوجی اور موثر انفارمیشن کو بروئے کار لاتے ہوئے سی آئی اے پولیس نے گرفتارکیا پولیس کا کہنا تھا کہ ملزمان سے اسلحہ بھی برامد کر لیا گیا ہے۔"	real
155	; ایس پی سی آئی اے کے مطابق ملزمان شارع عام پر شہریوں سے گن پوائنٹ پر موبائل فون اور زیورات چھیننے کی وارداتوں میں ملوث تھے۔ ملزمان نے ابتدائی تفتیش کے دوران شہر میں 35 وارداتوں کا انکشاف کیا ہے۔ گرفتار ملزمان میں رمضان اور سیف اللہ شامل ہیں جن سے مزید تفتیش جاری ہے۔; ایس پی نے ڈی ایس پی کوتوالی عثمان حیدر کے لیے تعریفی مراسلہ اور اُن کی ٹیم کے لیے تعریفی اسناد اور کیش انعام کا اعلان کیا ہے۔	real
156	; ; ; ; "ڈولفن اہلکاروں کی فائرنگ سے جاں بحق ہونے والے نوجوان کے ورثا نے لاش سڑک پر رکھ کر شدید احتجاج کررہے ہیں جس کے باعث ٹریفک جام ہوگئی ہے، مظاہرین نے فائرنگ کرنے والے ڈولفن اہلکاروں کے خلاف کارروائی کا مطالبہ کیا۔"; تفصیلات کے مطابق شاد باغ میں ڈولفن اہلکاروں نے ایک گاڑی میں موجود مشکوک افراد کو روکنے کی کوشش کی لیکن گاڑی میں سوار افراد نے گاڑی روکنے کی بجائے اور تیز کردی جس کی وجہ سے ڈولفن …	real
157	; "ذرائع کے مطابق محمد آصف نے ڈاکووں کو پکڑنے کی کوشش کی جس پر ڈاکووں نے فائرنگ کر دی کال کرنے کے باوجود رائیونڈ سٹی پولیس بروقت موقع پر نہ پہنچ سکی۔ڈکیتی کی دوسری واردات نواں کوٹ کے علاقے میں ہوئی جس میں شہری عتیق الرحمان کو موٹر سائیکل سوار ڈاکووں نے لوٹ لیا اورمزاحمت پر فائرنگ کر کے زخمی کر دیا نوانکوٹ پولیس نے موقع پر پہنچ کر تحقیقات کاآغازکردیا " دونوں زخمیوں کو جناح ہسپتال منتقل کر دیا گیا۔…	real
158	; "تفصیلات کے مطابق ایڈیشنل سیشن جج عرفان بسرا کی عدالت میں کیس کی سماعت ہوئی ،درخواستگزار معذورنو جوان فیصل امین کا کہناتھا کہ گزشتہ روزمسلم ٹاؤن میں ڈاکوؤں نے اس سے ٹرائی سائیکل، موبائل فون اور20ہزارنقدی لوٹ لی تھی،علی امین کا کہنا تھا کہ میرا ایک لاکھ روپےکانقصان ہوا ڈاکولوٹ کربےیارومددگارچھوڑگئے،میں ٹرائی سائیکل کےبغیرسفرنہیں کرسکتا۔"; ایڈیشنل سیشن جج عرفان بسرانے متاثرہ معذور نوجوان کا بیان …	real
159	; "جانب اقبال ٹاؤن تھانہ کی حدود میں ڈکیتی کی واردات کےدوران شادی سےواپس آتی ہوئی فیملی ڈاکوؤں کے ہتھےچڑھ گئی۔ موٹرسائیکل سوارڈاکو گن پوائنٹ پرزیور،نقدی اور موبائل فونز لےکرفرارہوگئےجبکہ تھانہ اقبال ٹاون پولیس کےاےایس آئی عرفان نےدرخواست لینےسےانکارکردیا۔"; یہ بھی لازمی پڑھیں:پاکستان کےبڑے انتخابی معرکوں میں سےایک بڑا انتخابی معرکہ کونسا ہے؟جانیے; سٹی 42 کے مطابق شاہدرہ چوک میں شہری وسیم کےساتھ …	real
160	; "تفصیلات کے مطابق شہر میں ڈاکوؤں کو روکنے میں لاہور پولیس ناکام، دن دھاڑے سی سی پی او آفس کے سامنے ڈکیتی کی بڑی واردات ہوئی، دو موٹر سائیکل سوار ڈاکو گاڑی کو فائر مارنے کے بعد ڈیڑھ کروڑ نقدی لے کر فرار ہو گئے، متاثرین کا کہنا ہے کہ منی چینجر کا کاروبار کرتے ہیں، ان کا ڈرائیور بنک سے پیسے نکلوا کر جا رہا تھا کہ موٹر سائیکل سوار ڈاکوؤں نے گن پوائنٹ پر یرغمال بنایا، گاڑی پر گولیاں ماریں اور ڈیڑھ ک…	real
161	; تفصیلات کے مطابق نواب ٹائون کے علاقے میں واقع پی سی ایس آئی آر سوسائٹی کے رہائشی جمیل احمد گھرمیں داخل ہوا تو چار مسلح نقاب پوش ڈاکو بھی داخل ہوگئے۔ڈاکوئوں نے اسلحہ کے زور پر اہل خانہ کو ایک کمرے میں یرغمال بنا کر 60تولے سونا اور دولاکھ نقدی لوٹ کر فرار ہوگئے۔; پولیس اور فرانزک کی ٹیموں نے تحقیقات کے لئے موقع سے شواہد اکٹھا کر لئے ہیں ۔ڈکیتی واردات کی درخواست اندراج مقدمہ کے لئے تھانہ نواب ٹائو…	real
162	; "پانچ مسلح ڈاکو گن پوائنٹ پر اہلخانہ کو زدوکوب کرتے ہوئے لاکھوں مالیت کے زیورات، نقدی اور موبائل فونز لوٹ کر باآسانی موقع سے فرار ہو گئے۔ پہلے تو پولیس واردات سے بے خبر رہی اور پھر روایتی کارروائی کرتے ہوئے مقدمہ درج کر لیا گیا۔ سی سی ٹی وی کے باوجود ملزمان کی شناخت اور گرفتاری کے لئے کوئی کارروائی نہ ہو سکی۔سٹی 42 کو موصول ہونے والی سی سی ٹی وی فوٹیج میں دیکھا جا سکتا ہے کہ ڈاکوؤں نے چہرے چھپ…	real
163	; "ڈیفنس فیز فور کے علاقہ ڈبل ڈی بلاک میں یاسر نامی شہری اپنی اہلیہ اور بچوں کے ہمراہ گاڑی میں سوار تھا، کہ موٹرسائیکل سوار مسلح ڈاکو نے ان پر دھاوا بول دیا۔اطلاع ملنے پر پولیس نے شواہداکٹھے کرکے مقدمہ درج کرلیاہے۔واقعے کی سی سی ٹی وی فوٹیج سٹی فورٹی ٹو نے حاصل کرلی ہے۔پولیس کا کہناتھا کہ سی سی ٹی وی فوٹیج کی مدد سے ملزم کی جلد گرفتاری یقینی بنائی جائے گی۔"	real
164	; "ذرائع کے مطابق ان ڈاکوؤں نے سبزہ زار کے ایک جنرل سٹور میں بھی ڈکیتی کی، دونوں کے چہرے فوٹیج میں واضح دکھائی دے رہے ہیں، مگر پولیس کی جانب سے روایتی کارروائی پر ہی دوکانداروں کو ٹرخایا جانے لگا ہے۔"; "فوٹیج میں ڈاکوئوں کو ہیئر سیلون میں ڈکیتی کرتے دیکھا جاسکتا ہے، ایک ڈاکو اسلحے کے زور پر یرغمال بنا رہا ہے تو دوسرا کیش کاؤنٹر سے پیسے نکال رہا ہے۔ ڈاکویرغمالی کسٹمرز اور دکاندار سے 33 ہزارروپے …	real
165	; "ڈاکو لوٹ مار کرتے ہوئے لاکھوں کی نقدی لوٹ کر زخمی ڈاکو سمیت فرار ہو گئے، واقعہ کی اطلاع پر ریسکیو ٹیمیں موقع پر پہنچ گئیں جنہوں نے زخمی باپ بیٹے کو طبی امداد کے لئے ہسپتال منتقل کر دیا، پولیس کا کہنا ہے کہ فرار ہونے والے زخمی ڈاکو کی تلاش جاری ہے۔"; "چوہنگ کے علاقے میں ڈاکوئوں نے موبائل شاپ میں گھس کرصلاح الدین اور اسکے بیٹے آصف کو گن پوائنٹ پر یرغمال بنا کر لوٹ مار کرنے کی کوشش کی جس دوران ب…	real
166	; صوبائی دارالحکومت میں خواتین کے ساتھ راہزنی کی وارداتیں معمول بن گئیں ۔پرانی انارکلی کے علاقے میں ڈاکو راہ گیر خاتون رضیہ بی بی کا بیگ چھین کر فرار ہوگیا ۔سٹی فورٹی ٹو کو موصول ہونے والی سی سی ٹی وی فوٹیج میں شلوار قمیض میں ملبوس موٹرسائیکل سوارڈاکو کو دیکھا جا سکتا ہے۔; ملزم نے گلی میں موجود افراد اور اطراف کا جائزہ لیا اور پلک جھپکتے ہی خاتون سے بیگ چھینا اور فرار ہو گیا۔گلی میں موجود افراد ن…	real
167	; "ایک رات میں چھ چوری اور ڈکیتی کی وارداتیں کرنے والا گینگ گرفتار ۔ پولیس نے چور ا ور ڈکیت گینگ کے دو ملزمان کو حراست میں لے کر ملزمان کاشف مسیح اور عامر عرف آلو سے ایک پستول، موٹر سائیکل 8موبائل فون اور پچاس ہزار نقدی برآمد کرلی۔ پولیس نے ملزمان کے خلاف مقدمہ بھی درج کر لیا ہے۔"	real
168	; "پولیس کے مطابق تھانہ ساندہ کی حدود میں دن دیہاڑے ڈکیتی کی واردات میں ڈاکو شہری اوراس کے اہلخانہ سے ہزاروں روپے کی نقدی اور طلائی زیورات لوٹ کر فرار ہوگئے، واقعہ کی فوٹیج میں دیکھا جا سکتا ہے کہ ڈاکو کتنی دیدہ دلیری کے ساتھ ایک کار سوار فیملی کو روکتے ہیں اور اس سے گن پوائنٹ پر لوٹ مار کرتے ہیں۔پولیس کا کہنا ہے کہ فوٹیج کی مدد سے ملزمان کی تلاش شروع کر دی گئی ہے، متاثرہ شہری کو جلد انصاف فراہم …	real
169	; "متاثرہ تاجر کہنا تھا کہ اس نے فوری پولیس کو اطلاع دی اور موٹرسائیکل کے نمبر بھی بتائے، مگر ابھی تک پولیس ان چار ڈاکوؤں کو تلاش نہیں کر سکی، نہ ہی ابھی تک ایف آئی آر درج کی گئی ہے،تاجر محمد اسلم نے مطالبہ کیا ہے کہ پولیس اس کی ایف آئی آر درج کرے اور جلد ملزمان کو گرفتار کرے۔"; "تفصیلات کے مطابق تاجر محمد اسلم کا کہنا تھا کہ اس نے شاہدرہ موڑ بینک سے پیسے نکلوائے اور اپنے گودام کی طرف روانہ ہوا،…	real
170	; متاثرہ شہری کا کہنا ہے کہ پولیس کی جانب سے واردات کا مقدمہ درج کر لیا گیا مگر ابھی تک ملزمان کی گرفتاری کے لیے کوئی کارروائی نہیں کی گئی۔; "واردات کی سی سی ٹی وی فوٹیج میں شلوار قمیض میں ملبوس 2 ڈاکوؤں کو دیکھا جاسکتا ہے، ایک ملزم نے کپڑے سے جب کہ دوسرے نے ہیلمٹ کی مدد سے چہرہ چھپا رکھا ہے۔ دونوں ملزم گن پوائنٹ پر شہری کو ڈراتے دھمکاتے دیکھا جا سکتا ہے، ملزم واردات کے دوران شہری ایاز سے نقدی وا…	real
171	; "پولیس کا کہنا تھا کہ دونوں ملزمان سابقہ ریکارڈ یافتہ ہیں، شہریوں کا کہنا تھا کہ چار روز سے ڈاکوؤں نے ناک میں دم کر رکھا تھا، آئے روز مسلم ٹاؤن کے علاقے میں موٹرسائیکل سوار ڈاکو وارداتیں کررہے تھے۔تفصیلات کے مطابق دونوں ڈاکو شہری سے نقدی موبائل فون چھین کر فرار ہو رہے تھے کہ ڈولفن پولیس سےآمنا سامنا ہوگیا، ڈولفن اسکواڈ نے ڈاکوؤں کوموقع پر گرفتارکر کےمسلم ٹاؤن تھانے منتقل کر دیا۔"	real
172	; تفصیلات کے مطابق پولیس کے مطابق ملزم حبیب ریاض اور الیاس کھڑی گاڑیوں کی بیٹری اتار کر فرار ہو جاتے تھے۔ اسی طرح ڈولفن سکواڈ نے خواتین سے موبائل و پرس چھیننے والے 3ملزمان کو بھی گرفتار کیا۔; ; "ملزمان پبلک مقامات پر کھڑی خواتین سے موبائل و پرس چھین لیتے تھے ۔ایس پی ڈولفن سکواڈ رضوان گوندل کا کہنا تھا کہ سنیپ چیکنگ کے دائرہ کار کو مزید بڑھائیں گے ۔مستقبل میں بھی چوروں،راہزنوں، ڈاکوؤں اور ناجائز ا…	real
173	; ڈولفن اور پی آر یو نے گرفتار ملزمان کے مختلف تھانوں میں مقدمات درج کرا دیے ہیں۔ ایس پی مجاہد و ڈولفن نے کہاہے کہ ڈولفن سکواڈ کا جرائم کی روک تھام میں کردارانتہائی اہم ہے۔; "تفصیلات کے مطابق ڈولفن وپی آر یو نے سنیپ چیکنگ و پٹرولنگ کے دورن ڈکیتی، راہزنی، آتش بازی ،نوسر بازی اور گن پوائنٹ پر رقم چھیننے والے ملزمان سمیت ون ویلنگ و منشیات فروشی کرنے والے ملزمان کو گرفتار کیا۔ ملزمان کے قبضہ سے اسل…	real
174	; "تفصیلات کے مطابق تھانہ فیکٹری ایریا سے چند گز کے فاصلے پر رات گئے ڈاکوؤں نے منظور نامی شہری کی گاڑی کو روکا اور شیشہ توڑ کر پیسے چھین لئے،ڈاکوں نے متاثرہ شہری کو تشدد کا نشانہ بھی بنایا۔"	real
175	; "تفصیلات کے مطابق ڈکیتی مزاحمت پر ایک اور شہری جان سےہاتھ دھو بیٹھا، واقعہ نشتر کالونی کے علاقے اعظم چوک میں پیش آیا، جہاں عبدالحمید اپنی سپیئر پارٹس کی دکان میں موجود تھا کہ اسی دوران نا معلوم موٹر سائیکل سوار ڈاکوؤں نے دکان میں داخل ہو کر لوٹ مار شروع کر دی، دکاندار کی جانب سے مزاحمت کرنے پر ڈاکوؤں نے اندھا دھند فائرنگ کر دی اور نقدی لوٹ کر فرار ہو گئے۔"; "عبدالحمید کوتشویشناک حالت میں قر یبی…	real
176	; "پولیس کے مطابق ڈکیتیوں مین ٹاپ ٹین کے پہلے نمبر پر ملزم شاہد راجپوت کے خلاف لاہور میں 167 مقدمات درج ہیں اسی طرح موٹر سائیکل چوری میں ٹاپ ٹین مین پہلے نمبر پر ہی ملزم کالا تیلی جا پر 139 مقدمات درج ہیں۔ راہزنی کی وارداتوں مین پہلے نمبر پر ملزم وسیم احمد کے خلاف 55 مقدمات درج ہیں لاہور پولیس نے ان ملزمان کی گرفتاریوں کے لیے ٹیمیں تشکیل دے دیں ہیں، پولیس کا ماننا ہے کہ ان ملزمان کی گرفتاری سے شہ…	real
177	; ذرائع کے مطابق ڈیفنس اے کے علاقے سپر ٹائون کے رہائشی عامر کے گھر موٹرسائیکل سوار گھس آئے جنہوں نے گھر میں داخل ہوتے ہی اندھا دھند فائرنگ کر دی۔ فائرنگ کے باعث کومل اور جویریہ شدید زخمی ہو گئیں جبکہ ملزمان موقع سے فرار ہو گئے۔ دونوں خواتین کو تشویشناک حالت میں جنرل ہسپتال منتقل کر دیا گیا۔ حادثے کی اطلاع ملنے پر پولیس بھی موقع پر پہنچ گئی اور جائے وقوعہ سے شواہد اکٹھے کر کے ملزمان کی تلاش شروع …	real
178	; "اس خبر کو لازمی پڑھیں:بیٹریاں چوری کرنے والا گروہ درد سر بن گیا، سٹی 42 نے فوٹیج حاصل کر لی"; سی سی ٹی وی فوٹیج میں دیکھا جا سکتا ہے کہ سول لائنز ڈویژن کے علاقے لٹن روڈ میں ڈیکور ٹائلز میں تین ڈاکو آئے۔ ایک دکان کے باہر پہرہ دیا جبکہ دو لوٹ مار کرتے رہے ۔متاثرہ دکاندار کا کہنا ہے کہ واقع کی اطلاع کے باوجود پولیس تاخیر سے موقع پر پہنچی جبکہ پولیس کا کہنا ہے کہ سی سی ٹی وی حاصل کر کے کاروائی شر…	real
179	; دو ماہ کی قلیل مدت میں ہی لاہور پولیس نے ای گیجٹ کی مدد سے ایک ہزار سے زائد ملزمان کو گرفتار کیا ہے۔ ایس پی سی آر او اسد الرحمان کا کہنا تھا کہ ای گیجٹ کی مدد سے لاہور کے ساتھ ساتھ دیگر اضلاع میں بھی ملزمان کی گرفتاریوں کا سلسلہ جاری ہے۔; "انویسٹی گیشن پولیس نے دو ماہ قبل ای گیجٹ سسٹم کا آغاز کیا تھا، جس کو ابتدائی طور پر لاہور کی موبائل مارکیٹس میں تاجروں نے استعمال کرنا شروع کر دیا۔ لاہور پول…	real
180	; پولیس نے ملزمان سے اکتیس موٹر سائیکلیں برآمد کر لی ہیں جبکہ مزید تفتیش جاری ہے جس میں مزید چوری شدہ موٹر سائیکلیں برآمد ہونے کی توقع ہے۔; "خبر پڑھنا مت بھولیں۔۔۔گرمی سے پریشان لاہوریئے خوش ہوجائیں، محکمہ موسمیات نے زبردست پیشگوئی کردی"; "یہ خبر ضرور پڑھیں۔۔۔لاہور کے مشہور پلازےمیں آگ لگ گئی، بڑی تعداد میں ہلاکتی"; شہرمیں موٹر سائیکل چوری کے واقعات بڑھنے لگے ۔ پولیس کے مطابق موٹر سائیکل چوری رو…	real
181	; "شہریوں نے بتایا کہ مغلپورہ میں کمسن موٹرسائیکل چوروں کا گروہ سرگرم تھا، کمسن چوروں کا یہ گروہ انتہائی مہارت کے ساتھ شہریوں کی موٹرسائیکلیں غائب کرتا اور پھر سستے داموں فروخت کر دیتا تھا، کمسن چوروں کے گروہ میں ایک بچی بھی شامل تھی، چھوٹو گینگ پہلے موٹرسائیکلوں کا لاک چیک کرتا اور پھر سائیڈ لاک نہ ہونے پر موٹرسائیکل لیکر رفو چکر ہو جاتا، چور گروہ نے ایک ماہ کے دوران متعدد موٹر سائیکلیں چوری کیں…	real
182	; تفصیلات کے مطابق ملزم کو چوری کے الزام میں گزشتہ روز گرفتار کیا گیا تھا اور مقدمہ درج نہ ہونے کے باوجود پولیس کیجانب سے ملزم پر بری طرح سے تشدد کے ساتھ تضحیک بھی کرتے رہے۔ واقعہ کی ویڈیو منظر عام پر آنے کے بعد ڈی آئی جی آپریشنز نے ایس ایچ او نشتر کالونی عامر سلیم اور محرر کو معطل کر دیا اور ایس ایس پی آپریشنز سے رپورٹ طلب کر لی۔;	real
183	; "ایف بی آرنے مرحلہ وارشہرکےتمام بڑے ڈیپارٹمنٹل سٹورز کے ٹیکس معاملات کی چھان بین کا عمل شروع کررکھا ہے، ایف بی آر نے ایچ کریم بخش ڈیفنس برانچ کی سیلز کا مکمل ریکارڈ طلب کرلیا ہے۔ ایف بی آرذرائع کے مطابق ایچ کریم بخش ڈیفنس برانچ کی سیلز کا ریکارڈ مرتب کرنے کیلئے چند روز قبل سٹور پر ٹیم بھی تعینات کی گئی تھی۔"; ایف بی آر نے ایچ کریم بخش ڈیفنس برانچ پر ٹیم تعینات کر کے سٹورکی سیلزکا ریکارڈبھی مرتب…	real
184	; "تفصیلات کے مطابق جلوموڑ کے مین بازار میں کپڑے والی دکان پر کپڑے چوری کے الزام میں دکاندار نے دو عورتوں کی مار مار کر درگت بنا دی،حبس بے جا میں رکھنے کے بعد چھوڑ دیا، دکاندار نے ساتھیوں کے ساتھ مل کر دونوں عورتوں کو ڈنڈوں اور ٹھڈوں سے مارا،تشدد کے بعد دکاندار نے مبینہ طور پر چور عورتوں کو سٹور میں بند کر دیاجہاں انہیں تین سے چار گھنٹے بند رکھا۔"; "علاوہ ازیں دکاندارنے تشدد بھی کیا اور گالیاں بھ…	real
185	; لاہور ویسٹ مینجمنٹ کے اہلکار چوریاں کرنے لگے۔ جوہر ٹاؤن بی ٹو بلاک میں باوردی اہلکار گھر کا سیویج ڈھکن لے اڑا۔ علاقہ مکینوں کے مطابق علی الصبح صفائی کا بہانہ بناتے اہلکار نے ڈھکن اٹھایا جو سی سی ٹی وی فوٹیج میں با آسانی دیکھا جا سکتا ہے۔ مکینوں کا کہنا ہے کہ علاقہ سے چیزیں چوری ہونا معمول بن گیا ہے۔	real
186	; ہیکرز ملزمان شہریوں کے اے ٹی ایم کارڈز ہیک کر کے پیسے چوری کرنے لگے۔ ذرائع کے مطابق ہیکرز نے گڑھی شاہو اور باغبانپورہ کے علاقے کے رہائشی نو افراد کے اکاونٹ ہولڈرز کو نشانہ بنایا۔ ہیکر نے باغبانپورہ کے شہری اقدس کا اکاؤنٹ ہیک کر کے اے ٹی ایم سے ڈیڈھ لاکھ روپے نکلوائے اور متاثرہ شخص اقدس سلیمی کا اکائونٹ حبیب بینک لمیٹڈ میں تھا۔ جبکہ 50 ہزار نکلوانے کے دو میسج اور 25 ہزار نکلوانے کا ایک میسج موب…	real
187	; "واضح رہے کہ وفاقی وزیر پاور ڈویژن عمر ایوب اور وفاقی سیکرٹری عرفان علی کی ہدایات پر مختلف علاقوں میں بجلی چوری کیخلاف آپریشن کیا جارہا ہے، جس کے دوران مذکورہ گینگ کے سرغنہ کو گرفتار کیا گیا۔"; "ملزم سے میٹر ریورس کرنے اور شنٹنگ کرنے والے آلات بھی برآمد کیے گئے ہیں۔ ابتدائی تحقیقات میں ملزم شبیر احمد کے موبائل فون سے لیسکو اور فیسکو کے ملازمین سے رابطوں کا بھی انکشاف ہوا ہے، جس پر محکمانہ کاررو…	real
188	; تفصیلات کے مطابق بکری چوری کا تنازع یا کوئی سنگین عداوت۔سینٹرل پارک ہاؤسنگ سوسائٹی کے سکیورٹی گارڈ کوسر عام فائرنگ کر کے قتل کردیا گیا۔ واردات کاہنہ کے علاقہ لدھوکی میں ہوئی۔ مقتول سہیل کھوکھر والد کے ہمراہ ڈیوٹی ختم کرکے جارہا تھا کہ موٹرسائیکل سواروں نے فائرنگ کردی۔مقتول کے والد کا کہنا تھا کہ چند روز قبل بکری چوری کے الزام پر محلے دار سے جھگڑا ہوا جس کی رنجش پر سہیل کو قتل کردیا گیا۔ پولیس ک…	real
189	; "واردات کی سی سی ٹی وی میں ملزم کو گھر میں داخل ہوتے اور واردات کر کے فرار ہوتے دیکھا جا سکتا ہے جبکہ پولیس کا کہنا ہے کہ واردات کا مقدمہ درج کر لیا گیا ہے اور سی سی ٹی وی کی مدد سے ملزم کی تلاش جاری ہے۔گلشن راوی کے علاقے رستم پارک میں چوری کی واردات امجد نامی شہری کے گھر ہوئی، چور نے گھر مالک کو چھت پر لے جا کر کیبل جوڑ کر پکڑا دی اور خود ٹی وی پر سیٹنگ کرنے کے بہانے کمرے میں آگیا۔ چور گھر کے …	real
190	; اس خبرکو لازمی پڑھیں:ایف آئی اے نے پرائیویٹ میڈیکل کالجز کی فیسوں پر جانچ پڑتال شروع کردی; ڈائریکٹر ایف آئی اے ڈاکٹر عثمان کا کہنا تھا کہ پراپرٹی کی ٹرانسفر کے دوران بینکوں کی جعلی مہریں استعمال کر کے خرد برد کی گئی جس سے فیڈرل بورڈ آف ریونیو کو جانے والا ٹیکس چوری کیا گیا جو واپس دلوایا جائے گا۔; فیڈرل بورڈ اف ریونیو نے ایسی متعدد ہاوسنگ سوسائٹیز کی نشاندہی کی جس میں پراپرٹی ٹیکس کی مد میں …	real
191	; "پرانی انارکلی کے علاقے میں بیٹری چور متحرک ہو گئے، ایک ہی دن میں 5 گاڑیوں کی بیٹریاں چوری ہو گئیں، شہری حسیب فاروق کی گاڑی کی بیٹری چوری کی سی سی ٹی وی میں دیکھا جا سکتا ہے کہ چور چند سیکنڈز کے دوران ہی گاڑی کی بیٹری چوری کرتا اور فرار ہو جاتا ہے۔ متاثرہ شہری کا کہنا ہے کہ سی سی ٹی وی کے باوجود پولیس کی جانب سے تاحال واردات کا مقدمہ ہی درج نہیں کیا گیا ہے۔"	real
192	; "تفصیلات کے مطابق جوہرٹاون ای ون بلاک کے رہائشی نیک محمد کا کہنا تھا کہ دو چور بیس ہزارروپے مالیت کی بیٹری اور 45 ہزار کی موٹرسائیکل چوری کرکے لے گئے ہیں جن کو سی سی ٹی وی فوٹیج میں دیکھا جاسکتا ہے۔ نیک محمد کا کہنا تھا کہ تھانہ جوہرٹاون میں اندراج مقدمہ کی درخواست دی ہے، پولیس چوروں کا پکڑ کر سزا دے اور سامان واپس کرائے، انہوں نے کہا کہ جوہر ٹاون میں چوری کی وارداتیں معمول بنتی جارہی ہیں۔"	real
193	; ساندہ کے علاقے میں شہری سلمان کی گاڑی گھر کے باہر کھڑی تھی کہ رات گئے ایک شخص نے گاڑی کے وائپر چوری کر لیے۔ گھر کے باہر لگے سی سی ٹی وی کیمروں نے چور کی اس حرکت کو عکس بند کر لیا۔ فوٹیج میں صاف دیکھا جا سکتا ہے کہ چور نے صرف پندرہ سیکنڈ میں گاڑی کے وائپر اتارے اوربیگ میں ڈال کر فرار ہو گیا۔; مقامی افراد کا کہنا تھا کہ گلی محلوں سے گاڑیوں کے وائپر چوری ہونا معمول بن چکا ہے اور مقامی افراد کی جان…	real
194	; نواب ٹاؤن میں دو مرد اور ایک خاتون پر مشتمل موٹرسائیکل چور گینگ سرگرم ہوگیا۔ موٹرسائیکل چوری کی فوٹیج میں مرد اور خاتون چور کو سنسان گلی میں ایک گھر کے باہر کھڑی موٹرسائیکل کو چوری کرتے دیکھا جاسکتا ہے۔چور خاتون کو اگلی گلی میں چھوڑ کر گھر کے باہر کھڑی موٹر سائیکل کو چابی لگا کر لے اڑا جبکہ واردات کا مقدمہ تھانہ نواب ٹاؤن میں درج کرلیا گیا ہے تاہم پولیس ملزمان کو گرفتار کرنے میں ناکام نظر آرہی…	real
195	; "ایس ایچ او ریلوے پولیس مغلپورہ محمد اکرم نے کارروائی کرتے ہوئے 2 ریلوے پولیس اہلکاروں سمیت پانچ افراد کو گرفتار کر لیا۔ ملزمان نے کل 64 کارٹن غائب کیے اور بازار میں فروخت کردئیے، جن میں موبائل اسسریز، گھڑیاں اور کاسمیٹکس کا سامان موجود تھا۔"; "ریلوے ڈرائی پورٹ مغلپورہ کی حفاظت کیلئے تعینات ریلوے پولیس کے عملے نے ہی اپنے محکمہ میں واردات کرڈالی۔ مغلپورہ ڈرائی پورٹ ای شیڈ سے کروڑوں مالیت کا ساما…	real
196	; "تاجروں کا کہنا ہے کہ دو ہفتے قبل بھی مارکیٹ میں دو دکانوں میں ایسے ہی چوری کی گئی تھی، لیکن پولیس کی جانب سے کارروائی نہیں کی گئی۔ واردات کی سی سی ٹی وی فوٹیج منظر عام پر آگئی لیکن ملزمان کا سراغ نہیں لگایا جا سکا۔ پولیس نے جائے وقوعہ سے فنگر پرنٹس اور شواہد اکھٹے کر لیے ہیں۔ پولیس کا کہنا ہے کہ سی سی ٹی وی کی مدد سے ملزمان کاسراغ لگایاجائے گا۔"; "تفصیلات کے مطابق ستوکتلہ کے علاقہ میں تالہ توڑ…	real
197	; "سمن آباد غزالی روڈ پر موبائل سیلولر کمپنی کی فرنچائز میں چور صبح پانچ بجے کے قریب تالے توڑ کر داخل ہوا، سی سی ٹی وی کیمروں نے چور کی ساری کارروائی محفوظ کر لی، سی سی ٹی وی فوٹیج میں دیکھا جا سکتا ہے کہ چور کو اس بات کا اندازہ تھا کہ فرنچائز میں سی سی ٹی وی کیمرہ موجود ہے اسی لیے چور نے اپنا چہرہ بھی ڈھانپ رکھا تھا۔مالکان کا کہنا تھا کہ چور فرنچائز سے پچیس ہزار روپے اوردیگر قیمتی سامان چرا کر …	real
198	; ; تفصیلات کے مطابق فنی تعلیمی بورڈ کے سکیورٹی سپر وائزر نے واک تھرو گیٹ بیچ دیا۔ فنی تعلیمی بورڈ کے پاس صرف ایک ہی واک تھرو گیٹ موجود تھا۔ گیٹ نہ ہونے وجہ سے سائلین بغیر چیکنگ اندر داخل ہونے لگے۔ واک تھرو گیٹ کی مالیت 5 لاکھ روپے سے زائد تھی۔; بورڈ انتظامیہ کا کہنا ہے کہ ذمہ داروں کے کیخلاف کارروائی کی جائے گی۔	real
199	; "کسٹمرز اور کیپٹنز کے نام ، فون نمبر، ای میل ایڈرس اور ٹرپ کی تفصیلات چوری ہوئیں ہیں۔ دوسری جانب کسٹمرز کے کریڈٹ کارڈز کا ڈیٹا چوری ہونے کا اب تک کوئی ثبوت نہیں ملا۔ کریم سروس نے کسٹمرز کو ایپ کا پاسورڈ فوری تبدیل کرنے کا مشورہ دیا ہے۔"; سٹی 42 نیوز ذرائع کے مطابق آن لائن ٹیکسی سروس کریم کے ڈیٹا پر سائبر حملہ کیا گیا ہے۔ جس سے کسٹمرز کا پرسنل ڈیٹا بھی چوری کرلیا گیا ہے۔ کریم انتظامیہ نے کہا ہے …	real
200	; "لیسکو چیف واجد علی کاظمی کی ہدایت پر شہر کے مختلف علاقوں میں بجلی چوری کیخلاف آپریشن کیا گیا،ایس ڈی او بلال کالونی سب ڈویژن عاشق علی نے جی ٹی روڈ پر تار بنانے والی فیکٹری میں بجلی چوری پکڑلی، ایس ڈی او کے مطابق تار بنانے والی فیکٹری میں میٹر ڈیڈ سٹاپ کر کے بجلی چوری کی جا رہی تھی جس کی وجہ سے بجلی چوری میں ملوث صارف کاشف مجید کیخلاف مقدمہ درج کرا دیا جبکہ پولیس نے بجلی چور کو گرفتار بھی کر لی…	real
201	; ; "لیسکو ذرائع کے مطابق لاہور شہر کے پوش علاقوں میں وسیع پیمانے پر بجلی چوری ہونے کا انکشاف ہوا ہے، لیسکو کے 687 فیڈرز پر 60 سے 60 فیصد تک بجلی چوری ہو رہی ہے، کمپنی مجموعی طور پر 1750 فیڈرز سے 42 لاکھ صارفین کو بجلی فراہم کرتی ہے، کمپنی کے 1750 میں سے 687 فیڈرز پر بجلی چوروں کا راج ہے، شہر میں جی او آر اور گلبرگ کے علاقوں میں 43 فیصد تک بجلی چوری ہو رہی ہے، اسی طرح گنجان آباد علاقوں میں بھی …	real
202	; اس خبر کوبھی ضرور پڑھیں:لیسکو نے لاکھوں روپے کی بجلی چوری پکڑ لی; "بجلی چور سے لاکھوں روپے کا ڈی ٹیکشن بل بھی وصول کی جائے گا، سپرنٹنڈنگ انجینئر رشید احمد، ایکسیئن عبداللہ شبیر کی ہدایت پرایس ڈی او باغبان پورہ تیمور عالم نے ٹیم کے ہمراہ کارروائی کی۔"; ; "باغبان پورہ کے علاقے میں لیسکو کی ٹیم نے تار بنانے والی فیکٹری پر چھاپہ مارا اور بجلی چوری پکڑ لی۔ایس ڈی او باغبان پورہ سب ڈویژن تیمور عالم کا…	real
203	; بجلی چوری کی بڑھتی ہوئی شرح کے پیش نظر وفاقی وزیر پاور ڈویژن نے وزیر اعلیٰ پنجاب کو خط ارسال کیا ہے جس میں وفاقی وزیر نے پنجاب حکومت سے درخواست کی ہے کہ بجلی چوروں کیخلاف مقدمات درج کر کے انہیں گرفتار کیا جائے تاکہ اربوں روپے کے خسارے کا ازالہ ہو سکے۔; "لاہور الیکٹرک سپلائی کمپنی میں نو ماہ کے دوران 6 ارب 65 کروڑ روپے کی بجلی چوری کا انکشاف ہوا ہے، کمپنی کے ناردرن سرکل میں ایک ارب 19 کروڑکی بجل…	real
204	; ایس ڈی او امجد حسین ناگراکا کہنا تھا کہ فیکٹری میں ڈائریکٹ سپلائی کی مدد سے بجلی چوری کی جا رہی تھی جس کی وجہ سے کمپنی کو ماہانہ لاکھوں روپے کا نقصان ہو رہا تھا۔ کمپنی نے کنکشن منقطع کر کے محکمانہ و قانونی کاروائی کا آغاز کر دیا ہے جبکہ بجلی چور کو لاکھوں روپے کا ڈی ٹیکشن بل بھجوایا جائیگا۔; ; سٹی 42 ذرائع کے مطابق ناگرا نے سپرنٹنڈنگ انجینئر ناردرن سرکل عطرت بخاری اور ایکسیئن راوی روڈ ڈویژن فو…	real
205	; سٹی فورٹی ٹو کو موصول ہونے والی سی سی ٹی وی فوٹیج میں دیکھا جاسکتا ہے کہ سفید رنگ کی شلوار قمیص میں ملبوس ایک چور دکان میں داخل ہوتا ہے اور جوتے دیکھنے کہ بہانے موقع کا فائدہ اٹھاتے ہوئے کائونٹر سے دکان کے مالک وسیم کا موبائل فون چوری کر کے فوری فرار ہوجاتا ہے ۔; اندراج مقدمہ کے لئے موبائل فون کے مالک وسیم کی جانب سے تھانہ مستی گیٹ میں درخواست جمع کروا دی گئی ہے مگر تاحال پولیس کی جانب سے واردا…	real
206	; "تفصیلات کے مطابق شاہدرہ میں گاڑیوں کے قیمتی شیشے چوری کرنیوالا گروہ سرگرم ہوگیا جب کہ سی سی ٹی وی کے باوجود پولیس کارروائی کرنے سے گریزاں ہے، شاہدرہ کے رہائشی ارشاد کی گھر کے باہر کھڑی گاڑی کے سائیڈ مرر چور لے گیا۔"; واردات کی سی سی ٹی وی میں پینٹ شرٹ میں ملبوس چور کو واردات کرتے دیکھا جاسکتا ہے جب کہ چور گاڑی کے دونوں سائیڈ مرر چوری کرکے باآسانی فرار ہوجاتا ہے۔ متاثرہ شہری کا کہنا ہے کہ سی س…	real
207	; شہر میں موٹرسائیکل چوری کی وارداتوں میں بے پناہ اضافہ ہو گیا جبکہ پولیس پتنگ بازوں کو پکڑنے تک ہی محدود ہو گئی ہے۔ اسلام پورہ کے علاقے کے رہائشی ضیا الاسلام کے ساتھ بھی ایسا ہی واقع پیش آیا۔ شہری ضیاالاسلام کے مطابق وہ اپنی موٹرسائیکل گھر کی دہلیز پر کھڑی کر کے گھر گیا جبکہ واپس پر اسکی موٹرسائیکل چوری ہو چکی تھی۔; سٹی فورٹی فورٹی ٹو کو واردات کی سی سی ٹی وی موصول ہو گئی جس میں چور کو موٹرسائی…	real
208	; "سوئی ناردرن گیس کمپنی لاہور ریجن کے جنرل مینجر قیصر مسعود کی ہدایت پر ٹیموں نے عالیہ ٹائون شالامار میں گیس چوری کیخلاف آپریشن کیا جس کے نتیجے میں سو میٹر غیر قانونی پائپ لائن پکڑی گئی، ٹیموں نے پائپ لائن اکھاڑ کر قبضے میں لے لی جبکہ قانونی کاروائی کا آغاز کر دیا گیا۔ سوئی ناردرن حکام کے مطابق ٹھیکیداروں کی ملی بھگت سے پائپ لائن بچھائی جا رہی تھی جس کیخلاف آپریشن کیا گیا۔"	real
209	; "گرفتار ملزمان جاوید اقبال اور وقاص آن لائن تعلیم حاصل کرنے والوں کی فیسیں چوری شدہ کریڈٹ کارڈ پر جمع کراتے، ایف آئی اے کے مطابق چوری شدہ کریڈٹ کارڈ پر فیسیں جمع کرانے پر سو سے زائد طالب علم مختلف ممالک میں گرفتار ہوچکے ہیں اور ملزمان طالب علموں سے رقم پاکستانی کرنسی میں وصول کرتے تھے۔"; "ایف آئی اے سائبر کرائم ونگ کے مطابق چند افراد طلبا سے آن لائن فیسوں کی ادائیگی کا جھانسہ دے کر ایسے کری…	real
210	; "ایف بی آر کے ریجنل ٹیکس آفس ٹو کی ٹیم نے برانڈرتھ روڈ پر سٹیل کے تاجر ایچ دوست محمد سٹیل ٹریڈرز کے کاروباری احاطہ میں چھاپہ مارا، ایف بی آر نے ایچ دوست محمد سٹیل ٹریڈرزکامکمل ریکارڈ قبضہ میں لے لیا۔ ایف بی آر کی ٹیم نے ایڈیشنل کمشنر فیصل اصغر کی ہدایت پر ڈپٹی کمشنر محمد علی میوء کی سربراہی میں کارروائی کی، حکام کے مطابق سیلز چھپا کر بڑے پیمانے پر ٹیکس چوری کرنے پرچھاپہ ماراگیا۔"; "اسسٹنٹ کمشنر…	real
211	; تفصیلات کے مطابق لیسکو کو گزشتہ سال کی نسبت ماہ مارچ میں 1 ارب 49 کروڑ روپے کا نقصان برداشت کرنا پڑا۔مختلف علاقوں میں بجلی چوری کی بڑھتی ہوئی شرح کی وجہ سے لیسکو کو خسارہ برداشت کرنا پڑا۔دستاویزات کے مطابق ماہ مارچ 2017میں لائن لاسز 10 اعشاریہ نو فیصد ریکارڈ کئے گئے۔; ذرائع نےبتایا کہ کمپنی کا بوسیدہ سسٹم بھی لائن لاسز بڑھنے کا اہم سبب ہے۔ واضح رہے کہ ایک طرف لیسکو بجلی چوری کیخلاف گرینڈ آپریش…	real
212	; "موٹر سائیکل مالک نے الزام لگایا کہ واقع کو بیس دن گزرنے کے باوجود پولیس کی جانب سے کوئی کاروائی عمل میں نہیں لائی گئی، فوٹیج دیکھنے کے باوجود واردات کے پانچ دن بعد پولیس کی جانب سے ایف آئی آر درج کی گئی، مگر تاحال پولیس کوئی کاروائی نہیں کر رہی۔سی سی ٹی وی فوٹیج میں واضح دیکھا جا سکتا ہے کہ دو موٹر سائیکل سوار گلی میں کھڑیں موٹر سائیکل کو سرے عام چوری کر کے لے جاتے ہیں۔ پہلے ایک شخص گلی میں کھ…	real
213	; مزنگ کے علاقے میں گاڑیوں کی بیٹریاں چوری کرنے والا گروہ سرگرم ہو گیا۔ بیٹری چورگروہ نے ایک ہی روز میں چھ گاڑیوں سے قیمتی; علاقہ مکینوں کے مطابق رکشہ ڈرائیورز انکی گاڑیوں کی بیٹریاں چوری کر رہے ہیں جبکہ واردات کی سی سی ٹی وی فراہم کرنے کے باوجود پولیس ملزمان کے خلاف کاروائی کرنے سے قاصر ہے۔; بیٹریاں چوری کیں اور چلتے بنے۔ موقع پر لگے سی سی ٹی وی کیمروں نے واردات کے مناظر عکس بند کر لئے جس میں چو…	real
214	; "23دکان کے مالک کا کہنا تھا کہ صبح جب وہ دکان کھولنے کھولنے آیا تو دیکھا کہ دکان کے تالے ٹوٹے ہوئے ہیں اور دروازہ بھی کھلا ہے، دکان کے اندر سامان بھی بکھرا ہوا ہوا تھا جبکہ کاونٹر میں موجود ایک لاکھ نقدی بھی غائب تھے۔جس پر اس نے پولیس کو اطلاع کی اور پولیس نے موقع پر آکے شواہد اکٹھے کیے، شادباغ پولیس کا کہنا تھا کہ نامعلوم افراد کے خلاف مقدمہ درج کر کے کاروائی شروع کردی گئی ہے۔"	real
215	; اقبال ٹاؤن ڈویژن سے بارہ موٹرسائیکلیں چھینی گئیں جبکہ ایک سو پینسٹھ چوری کے مقدمات درج ہوئے۔ کینٹ ڈویژن میں چودہ وارداتیں موٹرسائیکل چھیننے کی رپورٹ ہوئیں اور دو سو ایک مقدمات موٹرسائیکل چوری کے درج کئے گئے۔ سول لائنز ڈویژن سے چھ موٹرسائیکلیں چھینی گئیں جبکہ ایک سو باون چوری ہوئیں۔; ماڈل ٹاؤن ڈویژن میں اکیس موٹرسائیکلیں چھیننے کے مقدمات درج ہوئے اور دو سو چھبیس چوری ہوئیں۔ صدرڈویژن میں اٹھارہ م…	real
216	; سی سی ٹی وی فوٹیج میں دیکھا جا سکتا ہے کہ موٹر سا ئیکل سوار گھر کے باہر کھڑی گاڑی کے دونوں سائڈ مرر اتار کر رفو چکر ہو جاتا ہے۔ علاقہ مکینوں کے مطابق اس سے قبل بھی دو ایسی ہی وارداتیں ہو چکی ہیں جنہیں متعلقہ تھانے کی پولیس کے علم میں لایا جا چکا ہے ۔ آئےروز کی بڑھتی وارداتوں سے ایسامعلوم ہوتا ہے جیسے پولیس چوروں کے سامنے بے بس ہو چکی ہے۔ا	real
217	; https://www.youtube.com/channel/UCdTup4kK7Ze08KYp7ReiuMw/videos; "پولیس کے مطابق شادمان کے علاقہ فیز 1 کے رہائشی شیخ امتیاز کے گھر کرن نامی ملازمہ چھ ماہ سے کام کر رہی تھی جس نے چند روز قبل گھر میں پڑے سات لاکھ مالیت کے پرائز بانڈز چرائے اور پھر اپنے باپ کو دے دیئے جبکہ پولیس نے بھی واردات کا مقدمہ درج کر لیا ، مقدمہ درج ہونے پر گھریلو ملازمہ کرن کے والد نے شیخ امتیاز اور اسکے بیٹے کے خلاف کرن …	real
218	; "واردات کی سی سی ٹی وی میں چوری کے تمام مناظر کو دیکھا جا سکتا ہے ، متاثرہ دوکاندار کا کہنا تھاکہ مارکیٹ میں چور خواتین کا گروہ سرگرم ہے مگر پولیس کی جانب سے ملزمان کے خلاف تاحال کوئی کاروائی نہیں کی گئی۔"; "تفصیلات کے مطابق گلشن اقبال کے علاقہ میں واقع کریم مارکیٹ میں گارمنٹس کی دوکان میں چوری کی واردات ہوئی ، فورٹی ٹو نے واردات کی سی سی ٹی وی حاصل کر لی، واردات میں دو خواتین کافی دیرتک گارمنٹ…	real
219	; عابد نامی شہری کے ساتھ یہ واردات ہوئی ہے اور اسکا کہنا ہے کہ تھانہ رائیونڈ میں درخواست دی ہے لیکن تاحال پولیس نے کوئی ایف آئی آر درج کی ہے نہ ہی کوئی کاروائی عمل میں لائی گئی ہے۔رائیونڈ روڈ پر واقع شادی ہال کیسامنٹو مارکی میں شادی کی تقریب کے دوران ایک کم عمر چور شادی ہال میں گھسا اور موقع کا فائدہ اٹھا کر زیورات اور نقدی نیلے رنگ کے شاپنگ بیگ میں ڈال کر چوری کر کے نہایت پھرتی سے بھاگ گیا۔ سٹ…	real
220	; تفصیلات کے مطابق سٹی 42 نے نبی پارک راوی روڈ سے شہری عمران کی چوری ہونے والی موٹر سائیکل کی سی سی ٹی وی فوٹیج حاصل کر لی۔ فوٹیج میں صاف طور پر دیکھا جا سکتا ہے کہ موٹر سائیکل گھر کے باہر کھڑی ہے جبکہ پینٹ اور جیکٹ میں ملبوس چور موٹر سائیکل کے لاک کھول کر سٹارٹ کرنے کی کوشش کرتا ہے لیکن ناکامی کی صورت میں پیدل لے کر فرار ہو گیا۔ متاثرہ شہری نے راوی روڈ تھانے میں ایف آئی درج کرا دی ہے۔	real
221	; "ذرائع کے مطابق ایکسائزنےچوری ہونیوالی تمام گاڑیوں کی رجسٹریشن منسوخ کردی، شہری170سےزائدکاروں اور1670موٹرسائیکلوں سے محروم ہوگئے، لاہور میں2ماہ میں811موٹر سائیکلیں اور115 سے زائد گاڑیاں چوری ہوئیں۔"; "رپورٹ کے مطابق دیگر اضلاع میں 859موٹر سائیکلیں اور58 گاڑیاں چوری ہوئیں ہیں۔پٹرولنگ کیلئے فوسز کے موجود ہونے کے باوجود چوروں کو لگام ڈالی نہیں جا سکی ، روزانہ کی بنیاد پر شہر میں 8 سے 10 موٹر سائیک…	real
222	; "فوٹیج میں موٹر سائیکل چور کو واضح طور پر دیکھا جا سکتا ہے، تاہم ابھی تک قانون نافذ کرنے والے ادارے چور کو تلاش کرنے میں ناکام ہیں۔"; "تفصیلات کے مطابق لاہور میں رمضان المبارک میں بھی چوری کی وارداتیں ہونے لگیں، سبزہ زار کے علاقے میںم دن دیہاڑے شہری کی موٹرسائیکل چوری کر لی گئی، سی سی ٹی وی فوٹیج کے مطابق چور گلی میں پیدل آتا ہے اور گھر کے باہر کھڑی موٹر سائیکل کو چوری کرنے کے بعد کافی سفر پید…	real
223	; "ملزمان نے دوران تفتیش شہر کے مختلف علاقوں میں ہونیوالی چوری کی متعدد وارداتوں کا اعتراف کرلیا، سمن آباد پولیس نے تینوں ملزمان کیخلاف مقدمہ درج کرلیا ہے۔تفصیلات کے مطابق تھانہ سمن آباد پولیس نے کامیاب کارروائی کرتے ہوئے چور گینگ کوشکنجے میں لے لیا، ملزمان میں غلام مصطفی، سمیر اور دانیال شامل ہیں، ملزمان کے قبضہ سے 3 موٹر سائیکلز، 45 ہزار نقدی، موبائل فونز اور 2 پستول برآمد ہوئے۔"	real
224	; پولیس کے مطابق ملزمان کے قبضہ سے 5 موٹر سائیکلیں اور ایک پستول بھی برآمدہوا ہے۔ ملزمان کے خلاف مقدمات درج کرکے مزید تفتیش کی جار ہی ہے۔; تفصیلات کے مطابق راہول عرف ٹیڈی چار رکنی موٹر سائیکل چور گینگ گرفتار کر لیا گیا۔ پولیس کے مطابق ملزمان سابقہ ریکارڈیافتہ ہیں۔ ملزمان نے دوران تفتیش متعدد وارداتوں کا اعتراف بھی کیا ہے۔ ملزمان گن پوائنٹ پر شہریوں سے موٹر سائیکل چھینتے اور فرار ہو جاتے.	real
225	; "تفصیلات کے مطابق سبزہ زار پولیس سٹیشن کے قریب شہری حسن اپنے دوست سے ملنے گیا جہاں اس نے گھر کے باہر اپنی موٹرسائیکل کھڑی کی جو کہ چند منٹوں بعد ہی چوری ہو گئی، واردات کی سی سی ٹی وی میں دیکھا جا سکتا ہے کہ چور پہلے موٹرسائیکل کا لاک توڑتا ہے اور پھر موٹرسائیکل سٹارٹ نہ ہونے پر پیدل ہی لے کر فرار ہو جاتا ہے۔"; "متاثرہ شہری حسن کا کہنا تھا کہ واردات کی درخواست اور سی سی ٹی وی پولیس کو فراہم کی گ…	real
226	; "لیسکو حکام کا کہنا تھا کہ صارف نے ڈائریکٹ سپلائی کی مدد سے بجلی چوری کا سلسلہ شروع کر رکھا تھا جس کی وجہ سے کمپنی کو نقصان برداشت کرنا پڑ رہا تھا، ٹیم کے پہنچنے پر صارفین نے فیکٹری کے دروازے بند کر لئے جب کہ صارف کے خلاف محکمانہ و قانونی کارروائی کا آغاز کر دیا گیا ہے۔"	real
227	; "ستوکتلہ کے علاقے سے گلوکارہ مون پرویز کی گاڑی گھر کی دہلیز سے چوری ہو گئی۔ گلوکارہ مون پرویز کے مطابق انہوں نے اپنی گاڑی گھر کے باہر کھڑی کی جو چند منٹوں بعد ہی چوری ہو گئی۔ واقعہ کی سی سی ٹی وی فوٹیج سٹی فورٹی ٹو نے حاصل کر لی ، جس میں چوروں کو واردات کر کے گاڑی لیجاتے دیکھا جا سکتا ہے ۔"	real
228	; "اس خبر کو ضرور پڑھیں:بند روڈ: موٹر سائیکل چوری کی واردات، سٹی42 نے فوٹیج حاصل کر لی"; "ملزمان میں نذیر،ندیم، حسن اور شہزاد شامل ہیں۔ پولیس کا کہنا ہے کہ ملزمان سٹریٹ کرائم میں ملوث تھے اور گن پوائنٹ پر موٹر سائیکل چھینتے تھے۔ ملزمان کے قبضے سے آٹھ موٹرسائیکل ، موبائل فونز اور نقدی برآمد کر لی ہے۔ پولیس کا کہنا ہے کہ ملزمان سابقہ ریکارڈ یافتہ ہیں۔"	real
229	; "دوسری جانب ریڈ کرنے والی ٹیم کے سربراہ مینجر ایم اینڈ ٹی بشیر احمد نے بتایا کہ موقع سے ملنے والی ڈائری سے صارفین کے حوالہ نمبرز ملے ہیں، جو گینگ کے ساتھ ملکر بجلی چوری کرتے تھے۔"; "لیسکو چیف مجاہد پرویز چٹھہ نے ٹیم کی کاوشوں کو سراہتے ہوئے بتایا کہ لیسکو نے بجلی چوری میں ملوث بڑے گینگ کا سراغ لگالیا ہے، جے آئی ٹی بنا کر تحقیقات کو شفاف بنایا جا ئیگا، ٹیم کی تشکیل کے لئے پولیس کو مراسلہ ارسال ک…	real
230	; "لیسکو اسلامیہ پارک سب ڈویژن نے ڈپٹی میئر میاں طارق کے گھر پر چھاپا مارا، لیسکو ذرائع نے بتایا کہ بوگس میٹر لگا کر بجلی چوری کی جا رہی تھی، کچی آبادی فیروز پور روڈ پر کنکشن منظور کرایا گیا تاہم ایل او ایس منصوبے میں دکان ختم ہونے کے بعد میٹر گھر پرلگا دیا گیا۔ میٹر پرایک سال سے زیرو یونٹ چارج کیا جا رہا تھا، پکڑے جانے پر ڈپٹی میئر کو پچھہتر ہزار روپے بل چارج کیا گیا، ایس ڈی او اسلامیہ پارک سب …	real
231	; "ذرائع کے مطابق شہرکے داخلی راستے ٹھوکرنیازبیگ میں فائرنگ کاواقعہ پیش آیاہے جس کے نتیجے میں خوشاب کارہائشی اظہرنامی شخص زخمی ہوگیاجسے طبی امدادکے لیے ہسپتال منتقل کردیاگیا " فائرنگ کادوسرا واقعہ مصری شاہ میں پیش آیا جہاں نامعلوم افرادکی فائرنگ سے علاقے میں خوف وہراس پھیل گیاتاہم کوئی جانی نقصان نہیں ہوا۔""; ""مزید جاننے کیلئےپڑھیں : سال بدلا،گاڑی چوروں کی روش نہ بدلی، دو ماہ میں 1800سے زائد گاڑ…	real
232	; "ایس پی ڈولفن سکواڈ بلال ظفر کے مطابق ہیلپ لائن 15 پر موصولہ تمام1206 کالز پر رسپانس دیا گیا، دوران گشت ملزمان سے14 پسٹلز،7 میگزینزاورگولیاں برآمد کیں۔ منشیات کیخلاف کارروائی کےدوران 1 کلو سے زائد چرس اورشراب برآمد کی، جوانو ں نے شہر کے مختلف علاقوں میں کمیونٹی پولیسنگ کو فروغ دیتے ہوئے1290 افراد کی مدد کی۔"; "دوران پٹرولنگ 899 گاڑیوں، 2لاکھ18 ہزار سے زائد موٹر سائیکلوں اور1 لاکھ21 ہزار سے زائد…	real
233	; تھانہ کاہنہ کےعلاقےمیں شہری شاکرعلی شہری اپنی موٹرسائیکل کھڑی کرکےگھرکے اندرگیا۔ دس منٹ بعدواپس آیا تو موٹرسائیکل غائب تھی۔ سی سی ٹی وی فوٹیج کے مطابق چوروں میں ایک خاتون اور مد شامل ہے۔ خاتون موٹرسائیکل کی نشاندہی کرتی ہے جس کے فوری بعد مرد موٹر سائیکل چوری کر کے فرار ہو جاتا ہے۔شہری نےتھانہ کاہنہ میں سی سی ٹی فوٹیج اوراندراج مقدمہ کی درخواست دیدی۔ پولیس سی سی ٹی وی فوٹیج ہونے کے باوجودتاحال م…	real
234	; "سپئیرپارٹس کی چوری سے شروع ہونے والے ملزم پلک جھپکنے میں پوری موٹرسائیکل ہی غائب کرنے لگے۔ پولیس اہلکار کی سرپرستی میں چلنے والا موٹرسائیکل چور گینگ پولیس کے ہاتھ چڑھ گیا۔تین رکنی چور گروہ میں عمیر اقبال،وسیم اور پولیس اہلکار عمیر آفتاب شامل ہیں۔ملزمان موٹرسائیکل چوری کی وارداتیں ایک سال سے کر رہے تھے۔گجرپورہ پولیس نے ملزمان کو حراست میں لیکر چوری کی گئیں تیرہ موٹرسائیکلیں بھی برآمد کر لیں۔ م…	real
235	; "وزیراعلی پنجاب سردارعثمان بزدار نے تین سالہ بچی کے اغوا کا نوٹس لے لیا، سی سی پی او سے واقعے کی رپورٹ طلب کرتے ہوئے بچی کی بحفاظت بازیابی کیلئے فوری اقدامات کرنے کی ہدایت جاری کی ہے۔ وزیراعلیٰ نے پولیس کو ہدایت جاری کرتے ہوئے کہا ہے کہ اغواء میں ملوث ملزم کی جلد گرفتاری یقینی بنائی جائے، انہوں نے کہا کہ شہریوں کا تحفظ ریاست کی اولین ذمہ داری ہے جس میں کوئی غفلت برداشت نہیں کی جائے گی۔"	real
236	; "پولیس کا کہنا تھاکہ ملزم اشتیاق طیبہ کو کسی نامعلوم جگہ پر لیجانا چاہتا تھا، شہریوں کی جانب سے اشتیاق کی مشکوک حرکات پر انھوں نے پولیس کو اطلاع کی جس پر پولیس نے کاروائی کرکے ملزم کو گرفتار کر لیا اور طیبہ کو بازیاب کروا کراس کے والدین کے حوالے کیا۔ پولیس کا کہنا تھا کہ ملزم اشتیاق کو حراست میں لے کر تفتیش شروع کردی گئی ہے۔"; "پولیس کا کہنا تھا کہ طیبہ کے اغوا کا مقدمہ بادامی باغ پولیس سٹیشن م…	real
237	; "سٹی 42 نیوز ذرائع کے مطابق الجنت ٹاون چونگ کی ممتاز بی بی نے اپنے وکیل ملک اظہر عباس کی وساطت سے اپنی بارہ سالہ بیٹی سیما کی بازیابی کیلئے درخواست دائر کی۔ خاتون نے موقف اختیار کیا کہ ملزم کاشف ، احمد اور سیف اللہ نے اسکی بیٹی کو اغوا کر لیا ہے۔"; "پولیس مقدمہ درج کر رہی ہے نہ لڑکی کو بازیاب کررہی ہے،پولیس نے ملزمان سے ساز باز کر لی ہے۔ خاتون نے استدعا کی کہ اس کی بیٹی کو بازیاب کرایا جائے۔ ای…	real
238	; "والدین کہتے ہیں بچی کی بازیابی میں تاخیر ہوئی تو ان کے صبر کا پیمانہ لبریز ہوگیا، انہوں نے آئی جی پنجاب دفتر کے سامنے احتجاج بھی کیا، اب ان کا لخت جگر ان کے پاس ہے جس پر لاہور پولیس کے مشکور ہیں۔"; "معصوم ذہنی معذور میرب گھر پہنچی تو ماں کے گلے لگ کر خوب روئی، والدہ نے اپنے جگر گوشے کا ماتھا چوما اور بچی کی بازیابی پر خدا کا شکر ادا کیا۔"; 29 جون کو امین پارک بند روڈ کی رہائشی ذہنی معذور نو س…	real
239	; خبر پڑھیں۔۔تھانہ راوی روڈ کے علاقے سے 5 سالہ بچہ اغواء; ایف آئی اے کے مطابق ایک بچے نے ملزم کے ہاتھوں بلیک میل ہو کر زندگی کا خاتمہ کر لیا جبکہ بچے کا والد اپنے بیٹے کی موت کا صدمہ برداشت نہ کر سکا اور ہارٹ اٹیک سے وہ بھی دم توڑ گیا۔; "کیس کے تفتیشی افسر اشر کا کہنا تھا کہ ملزم اکیلا نہیں بلکہ ایک گروہ کی صورت میں بچوں کے ساتھ نازیبا حرکات کرتے اور پھر انکی ویڈیو بنا کر مزید بلیک میل کرتے تھے۔…	real
240	; "حافظ فہداہلخانہ کے ساتھ گلشن اقبال پارک تفریح کیلئےگیا،جہاں اس کےپانچ سالہ بیٹےسعد کو اغوا کار خاتون ساتھ لیےچلتی بنی،سٹی42 کو موصول ہونے والی سی سی ٹی وی میں برقع پوش خاتون کودیکھا جا سکتا ہے کہ وہ بچے اپنےساتھ لیجا رہی ہے، 5 سالہ سعد اپنی فیملی کے ساتھ پارک آیا تھا اور جھولے لیتے ہوئے اہلخانہ سے بچھڑ گیا تھا۔سعد کےوالد کا کہنا تھا کہ واردات کی بروقت اطلاع دینے کے باوجود حسب معمول پولیس موقع …	real
241	; "سٹی فورٹی ٹو کو موصول ہونے والی سی سی ٹی وی فوٹیج میں دیکھا جاسکتا ہے کہ اغواء کار بچے کو اپنے ساتھ لے کر جارہا ہے، پولیس نے واقعہ کا مقدمہ درج کرلیا لیکن سی سی ٹی وی فوٹیج میں ملزم کی شکل واضح ہونے کے باوجود پولیس ملزم گرفتار نہیں کرسکی۔"; تفصیلات کے مطابق تھانہ راوی روڈ کے علاقہ کے رہائشی محمد مبین نامی بچے کے والد محمد مقصود کا کہنا ہے کہ بچہ گلی میں کھیل رہا تھا کہ اغواء کار بہلا پھسلا کر …	real
242	; یہ بھی لازمی پرھیں۔۔۔ایک اور معصوم کلی وحشت کا نشانہ بن گئی; علاوہ ازیں جعلی پیرسے برآمد کی گئی ساجدہ اوراس کی بچی مہک کو سیشن عدالت میں پیش کیاگیا۔عدالت نے کرن کی بازیابی کیلئے سبزہ زارپولیس سے فوری طورپررپورٹ طلب کرلی ہے۔; سٹی 42 کے مطابق لاکھ کوششوں کے باوجودجعلی پیروں سے آہنی ہاتھوں کیساتھ نمٹانہ جاسکا۔ جن نکالنے کے بہانے خاتون کواس کی دو بچیوں سمیت اغواء کرنے کاافسوسناک واقعہ اُس وقت سامنے…	real
243	; ; والدین کا اکلوتا بیتا ڈیڑھ سالہ بلال گزشتہ سات روز سے گھر کے باہر سے اغوا ہوا اور پھر اسکا سراغ نہیں لگایا جا سکاواقعے کی ایف آئی آر درج ہو گئی لیکن سات روز گزر جانے کے باوجود پولیس بچے کو بازیاب کروانے میں ناکام ہے۔ اہل خانہ کا کہنا ہے کہ پولیس بچے کو تلاش ہی نہیں کر رہی۔تفصیلات کے مطابق ساندہ کے علاقے گلشن راوی میںوالدین کا اکلوتا بیٹا ڈیڑھ سالہ بلال سات روز سے لاپتہ ہے۔ اسکے اہل خانہ کا کہ…	real
244	; "شمالی چھائونی کے علاقے ابراہیم کالونی سے تین روز قبل انیس سالہ حنا خان پراسرار طور پر اغوا ہوئی، مغویہ کی والدہ کے مطابق اسکی بیٹی گھر سے دوکان پر سودا سلف لینے گئی اورواپس گھر نہ پہنچی جسے نامعلوم افراد نے اغوا کر لیا۔"; متاثرہ لڑکی کی والدہ نے اعلی حکام سے مطالبہ کیا ہے کہ وہ نوٹس لیکر اسکی بیٹی کو بازیاب کروائیں۔پولیس کی جانب سے حنا کے اغوا کا مقدمہ درج کر لیا گیا مگراسکی بازیابی کے لئے کوئ…	real
245	; "یاد رہے شاہد نصیر کو پولیس وردیوں میں ملبوس اہلکاروں نے 18 جے جوہر ٹاؤن سے اغوا کیا تھا، جس کیلئے 25 لاکھ تاوان کا مطالبہ کیا گیا۔ انویسٹی گیشن پولیس نے جن دو ملزمان کو گرفتار کیا ہے وہ جی او آر کی ڈیوٹی پر معمور تھے۔"; "ذرائع کے مطابق انویسٹی گیشن پولیس کی جانب سے جوہر ٹاؤن سے اغوا ہونے والے شاہد نصیر کے ملزمان کو گرفتار کرلیا گیا ہے جن میں ڈی سی آفس ڈیوٹی پر معمور پولیس اہلکاروں کے ملوث ہونے…	real
246	; تھانہ سمن آباد میں درج مقدمہ میں پولیس نے 3اہلکاروں کو گرفتار کر لیا ہے جبکہ دوسرے مقدمہ میں نامزد ملزمان میں سے تاحال کوئی بھی گرفتار نہیں ہو سکا۔; "اہلکاروں کے خلاف اغوا کا دوسرا مقدمہ تھانہ وحدت کالونی میں 21 مئی کو درج کیا گیا، مقدمہ کے مطابق چار پولیس اہلکاروں نے منظور نامی شخص کو اغوا کیا، یہ مقدمہ وقوعہ کے24 دن بعد درج کیا گیا، اغوا کار پولیس اہلکاروں نے 20 لاکھ روپے تاوان کا مطالبہ کیا …	real
247	; "بچے کا کہناتھا کہ اس کی طعبیت خراب ہونے پر سکول سے رکشے میں گھر آرہا تھا۔ ڈارئیور نے رکشہ غلط راستے پر ڈال دیا تھا " جس پر اس نے شور مچایا۔ ضرورت اس امر کی ہے کہ والدین اپنے بچوں کی حفاظت کے لیے محتاط رہیں اور کسی بھی صورت اکیلے سفر سے گریز کی ہدایت کریں۔""; ; ٹریفک وارڈن سید اسد عباس کا کہنا ہے کہ اس نےاپلائیڈ فور رکشہ میں سے بچے کے شور کی آواز سن رکشے کے پیچھے بھگا۔ جس پراغواءکار رکشہ ڈائی…	real
248	; "شاد باغ کے علاقہ بھگت پورہ کی رہائشی تیرہ سالہ ربیعہ کے والد کی مدعیت میں تھانہ شاد باغ میں مبینہ اغوا کا مقدمہ درج کرلیا گیا ہے۔ پولیس کے مطابق والدین کا کہنا ہے کہ ربیعہ گزشتہ روز گھر سے ٹیوشن پڑھنے گئی، رات کو دیر تک واپس نہ لوٹی تو لواحقین نے اکیڈمی جا کر ربیعہ کا پتا کیا، مگر اکیڈمی کی انتظامیہ نے بتایا کہ ربیعہ تو اکیڈمی آئی ہی نہیں، بہت معلوم کرنے پر بھی رابعہ کا پتہ نہ چل سکا۔لواحقین …	real
249	; دوسری جانب 2017 میں کچہریوں میں کورٹ میرج کرانے کا جھانسہ دے کر ناپختہ ذہن رکھنے والے لڑکوں اور لڑکیوں کو شادی کے بندھنمیں باندھ دیا گیا۔ جن میں سے اکثر نکاح سول عدالتوں میں جا کر جعلی نکلے۔ 2017میں 100 کیس جن میں نکاح ناموں کو چیلنج کیا گیا ابھی تک عدالتوں میں زیرسماعت ہیں۔ جن میں عدالتوں نے شہادت طلب کررکھی ہے۔; ; تفصیلات کے مطابق لاہور کی ماتحت عدالتوں میں 2017 میں والدین کی رضامندی کے بغیر …	real
250	; "تفصیلات کے مطابق گلبرگ سیون اپ پھاٹک پر احتجاجی مظاہرہ کرتے ہوئے مظاہرین کا کہنا تھا کہ چار روز قبل صائمہ گھر سے نکلی مگر واپس نہ آئی، صائمہ کے مبینہ اغوا پر لواحقین کی جانب سے تھانہ شمالی چھاؤنی پولیس کو اطلاع دی گئی مگر پولیس نے تعاون کرنے کی بجائے الٹا دھمکیاں دینا شروع کردیں۔"; "پولیس کے عدم تعاون پر صائمہ کے لواحقین اور اہل علاقہ نے ٹائر نظر آتش کر کے شدید احتجاجی مظاہرہ کیا اور سڑک دونو…	real
251	; "تھانہ بادامی باغ نے بچی کے والد کی مدعیت میں ملزم کے خلاف اغوا اور زیادتی کی کوشش کا مقدمہ درج کر لیا ہے، اہل خانہ نے ملزم کو سخت سے سخت سزا دینے کا مطالبہ کیا۔تفصیلات کے مطابق بادامی باغ کے علاقہ میں تین سالہ بچی کے ساتھ زیادتی کی کوشش کرنے والے شخص کو علاقہ مکینوں نے رنگے ہاتھوں پکڑ لیا۔ ملزم نے صبح 10 بجے بچی کو گھر کے سامنے سے اغوا کیا اور ایک بند فیکٹری میں لے جا کر زیادتی کی کوشش کرنے لگ…	real
252	; مقتول کے اہل خانہ کے مطابق دس روز قبل تھانہ شاہدرہ میں اغواء کا مقدمہ درج کرایا گیا۔ غلام محی الدین کا اپنے بھائیوں کے ساتھ وراثتی زمین کا تنازع دو سال سے چل رہا تھا۔; پولیس کا کہنا ہے کہ جائیداد کے تنازع پر قتل سمیت مختلف پہلوؤں پر تفتیش جاری ہے۔ لواحقین کی جانب سے نامزد ملزمان فرار ہیں جن کی گرفتاری کی کوششیں کی جارہی ہیں۔; لواحقین کا الزام ہے کہ زمین پر قابض بھائی اور بھتیجوں نے حق مانگنے پر…	real
253	; تفصیلات کے مطابق فرحان نامی شہری کے اغوا کا مقدمہ تھانہ باغبانپورہ میں جنوری میں درج کیا گیا جس کے بعد مقدمہ کی تفتیش سی آئی اے پولیس کے سپرد کر دی گئی۔ نامعلوم اغوا کاروں کی جانب سے رسی کے ساتھ باندھ کر الٹا لٹکا کر ڈنڈوں کے ساتھ مارنے کی ویڈیو گھر والوں کو بھجوائی گئی ہے جس میں تشدد واضح طور پر دیکھا جا سکتا ہے۔; "یہ خبر پڑھیں۔۔۔لیڈی ہیلتھ ورکر دھرنے میں جاں بحق، مال روڈ پر کہرام مچ گیا"; پول…	real
254	; "پولیس کے مطابق ملزم کی شناخت نعیم کے نام سے ہوئی ہے جس کی لاش کو پوسٹمارٹم کے لیے مردہ خانہ منتقل کردیا گیا ،مبینہ پولیس مقابلے میں ملزم نعیم کی ہلاکت پر بچے کے لواحقین نے بھی تصدیق کردی کہ انکے بچے کو مبینہ طور پر اسی شخص نے اغوا کیا تھا،پولیس نے بچے کی لاش کو پوسٹمارٹم کے بعد لواحقین کے حوالے کردیا،لاش گھر پہنچی تو کہرام مچ گیا۔"; "تفصیلات کے مطابق اقبال ٹاؤن کے علاقے نجف کالونی سے دو روز قب…	real
255	; "تفصیلات کے مطابق ڈیفنس کے علاقے میں 18 سالہ تحریم گھر میں ملازمہ تھی، ایک ہفتہ قبل تحریم گھر سے کام کے لیے نکلی لیکن واپس نہ آئی۔لواحقین کے مطابق انکی بیٹی جس گھر میں بطور ملازمہ کام کرتی تھی انکے گھر بھی نہ پہنچ سکی۔پولیس نے لڑکی کے والد اعجاز کی مدعیت میں مقدمہ تو درج کر لیا لیکن لڑکی کا تاحال سراغ نہ لگا سکی۔لڑکی کے والدکا کہنا تھا کہ قانون کے محافظ اس معاملے میں ہماری کو ئی مدد نہیں کر رہے…	real
256	; "یہ خبر پڑھیں۔۔۔8 ڈی آئی جیز، پنجاب اور وفاق کے درمیان شٹل کاک بن گئے"; ایس ایچ او باغبانپورہ خالد کا کہنا ہے کہ ابتدائی تحقیقات کے مطابق واقعہ گھریلو جھگڑوں کا نتیجہ معلوم ہوتا ہے۔; خبر ضرور پڑھیں۔۔تھانہ راوی روڈ کے علاقے سے 5 سالہ بچہ اغواء; "پولیس کے مطابق باغبانپورہ کے رہائشی 30 سالہ مزمل کا اکثر اپنی بیوی 26 سالہ ماریہ کے ساتھ جھگڑا رہتا تھا۔ بدھ کی رات بھی دونوں میں جھگڑا ہوا جس دوران مزم…	real
257	; ; "قوت گویائی اور شنوائی سے محروم حسنین بھارت کیسے پہنچا، بتانے سے قاصر ہے۔ اشاروں کی زبان اور اپنے حلیے کے مطابق بھارت میں اسے نہ صرف اچھے طریقے سے رکھا گیا بلکہ سکول میں پڑھایا بھی گیا اور سکول میں اس کا نام ونیش رکھا گیا۔"; ; حسنین علی کے لوٹتے ہی گھر کےباہر لوگوں کا رش لگ گیا۔ محلے دار اور رشتہ دار حسنین علی کے والد کو مبارکباد دینے آئے۔ ننھے بچے اس کے گرد گھیرا ڈالے اسے گلے ملے۔ حسنین کی …	real
258	; "روبینہ اپنے خاوند کے حق میں بیان دینے سیشن عدالت پیش ہوئی، اس کی ماں اور دیگر گھر والے بھی پہنچ گئے، دونوں فریقین میں گھمسان کی لڑائی شروع ہو گئی جس کے نتیجے میں دو خواتین زخمی ہوگئیں۔ روبینہ اور علی رضا کی ماں رشتے میں آپس میں بہنیں ہیں، مگر لڑائی دوران دو نوں بہنوں نے ایک دوسرے کے گریبان پکڑ لئے، یہ لڑائی ایڈیشنل سیشن جج ندیم اختر تبسم کی عدالت کے باہر ہوئی۔یاد رہے روبینہ نے علی رضا سے دو م…	real
259	; اشتہاریوں کوگرفتارنہ کرنےسےصوبہ بھرمیں جرائم کی شرح میں بھی خطرناک حدتک اضافہ ہورہا ہے۔; "پنجاب پولیس کی جانب سےدعوی کیاجاتا ہےکہ پنجاب کومحفوظ بنانے اورمجرمان کوپکڑنے کےلیے جدید ٹیکنالوجی اور نت نئی فورسز موجود ہیں، لیکن اگر بات کی جائےاے کیٹگری کے اشتہاریوں کی تولاہورسمیت پنجاب بھر میں14 ہزار720 قاتل، ڈکیت، اغواکاراورریپ کےملزم پولیس کی پہنچ سے دور ہیں۔"; "پولیس کےاعدادوشمار کے مطابق فیصل آبا…	real
260	; اس حوالے سے پولیس کا کہنا ہے کہ اے ایس آئی ذوالفقار کے خلاف مقدمہ درج کر کے مزید کارروائی کی جا رہی ہے جبکہ خاتون کو میڈیکل کے لئے بھجوا دیا گیا ہے۔; پولیس کے مطابق بادامی باغ کے علاقہ میں تھانیدار ذوالفقار نے شہناز نامی خاتون کو اغوا کر کے اسے مبینہ زیادتی کا نشانہ بنا ڈالا۔ پولیس ٹیم نے ملزم تھانیدار ذوالفقار کو رنگے ہاتھوں گرفتار کر لیا جبکہ قبضہ سے خاتون کو بھی برآمد کر لیا۔	real
261	; لواحقین کا کہنا ہے کہ بچے کی گمشدگی کی ذمہ دار ہسپتال انتظامیہ ہے کیونکہ مشکوک خاتون کافی دیر سے گائنی وارڈ میں موجود تھی مگر کسی انتظامی بندے نے کارروائی نہیں کی۔	real
262	; "حبا جنت تو مل گئی لیکن پولیس کو اب اغوا کار کی تلاش ہے، پولیس کا دعویٰ ہے کہ نادرا ریکارڈ اور سی سی ٹی وی فوٹیج کی مدد سے ملزم کو جلد گرفتار کر لیں گے۔"; "پولیس نے موقع پر پہنچ کر بچی کو بازیاب کرلیا اور پھر متعلقہ تھانے میں والدین کے حوالے کردیا،اعلیٰ پولیس حکام اور ترجمان حکومت پنجاب شہباز گل کریڈٹ لینے فوری پولیس اسٹیشن پہنچ گئے، جہاں ان کو پھولوں کے ہار پہنائے گئے۔"; اس موقع پر شہباز گل زب…	real
263	; "تفصیلات کے مطابق سروسز ہسپتال میں صبح دس بجے پیدا ہونے والی نومولود بچی کو نوسر باز خاتون لے کر فرار ہو گئی۔ سٹی 42 نے اغوا کی سی سی ٹی وی فوٹیج حاصل کرلی " فوٹیج میں دیکھا جا سکتا ہےکہ ایک برقعہ پہنے ہوئے خاتون بچی کو اُٹھا کر لے جارہی ہے۔""; اس موقع پر ایس ایچ او حسین نے کہا کہ پولیس پوری کوشش کر رہی ہے جلد ہی بچی کا پتہ لگ جائے گا۔ لواحقین نے کہا کہ ڈاکٹر کا روپ دھارے اغوا کار خاتون نے سروس…	real
264	; ڈی آئی جی آپریشنز وقاص نذیر نے واقعہ کا نوٹس لیتے ہوئے فوری کارروائی کا حکم دے دیا ہے جبکہ ایس پی کینٹ آصف اعوان کا کہنا ہے کہ ملزمان کی گرفتاری کے لئے چھاپے مارے جا رہے ہیں۔; "ہربنس پورہ کے علاقے میں افسوسناک واقعہ پیش آیا جہاں میاں بیوی کے جھگڑے پر سسرالی آپے سے باہر ہو گئے۔ انہوں نے پہلے داماد کبیر کو اغوا کیا پھر زنجیروں میں جکڑ دیا، تشدد بھی کیا، دل نہ بھرا تو سر کے بال بھی مونڈ دئیے۔…	real
265	; "پولیس کا کہنا ہے ملزمان رہائی کے بدلے 10 لاکھ روپے تاوان کا مطالبہ کرتے رہے، نوجوان کو اغواء کرکے بیگو ایپ پہ لائیو کیا گیا، ملزمان اور مغوی کے درمیان لین دین کا تنازع تھا۔"; پولیس کا مزید کہنا ہے کہ ملزمان نے بیگو ایپ پر بلٹ مافیا کے نام سے گروپ بنا رکھا ہے۔ نوجوان کو بازیاب کراکے 9 ملزمان کو گرفتار کرلیا گیا۔	real
266	; "گرفتارملزمہ نے اعتراف جرم کرنے کی بجائے لواحقین کی جانب سے بچہ اپنی مرضی سے اس کے حوالے کرنے کا موقف اپنایا، ملزمہ کا کہنا تھا کہ اس نے شوہر کو اپنےفعل سے بے خبر رکھا۔"; ; "پولیس کا کہنا ہے کہ ملزمہ تک پہنچنے کیلئے سی سی ٹی وی کیمروں کی مدد لی گئی، پولیس نے بازیاب ہونے والے بچے کو ورثا کے حوالے کردیا۔"; "لیڈی ولگنڈن ہسپتال سے نومولود بچے کو اغوا کرنے والی ملزمہ کو سی آئی اے کوتوالی پولیس نے گر…	real
267	; "واقعہ پر متاثرہ خاندان نے ہسپتال کے سامنے احتجاجی مظاہرہ کیا، مظاہرین کا کہنا ہے کہ سکیورٹی انتظامات کے باوجود بچہ کیسے اغوا کر لیا گیا اور سکیورٹی پاس کے بغیر ہی بچہ خاتون کو دے دیا گیا۔"; "دوسری جانب ہسپتال انتظامیہ کا کہنا ہے کہ بچے کی نانی نے خود بچے کو اغوا کار خاتون کے حوالے کیا، پولیس کا کہنا ہے کہ واردات کا مقدمہ درج کر کے سی سی ٹی وی کی مدد سے ملزمہ کی تلاش جاری ہے۔"; "لیڈی ولنگڈن ہسپ…	real
268	; معصوم زینب کے قاتل عمران کے اعترافی بیان کی وڈیو منظر عام پر آ گئی۔ ملزم عمران علی نے اپنے اعترافی بیان میں واضح طور پر کہا کہ زینب کو والدین کا بتا کر ساتھ لے گیا تھا۔ ملزم کا تفتیشی ٹیموں کو کہنا تھا کہ معصوم زینب کو والدین سے ملوانے کا بہانہ بنا کر اغواء کیا جبکہ بچی باربار پوچھتی رہی کہاں جارہے ہیں؟ جس پر ملزم کا کہنا تھا کہ وہ راستہ بھول گیا ہے اوراندھیرا ہو گیا ہے۔ دوسرے راستے سے چلتے ہی…	real
269	; "خبر پڑھیں۔۔۔نواز شریف، مریم نواز اور کیپٹن صفدر کی اڈیالہ جیل سے رہائی کی امید پیدا ہوگئی"; "تفصیلات کے مطابق انسداد دہشت گردی کی خصوصی عدالت کے جج سجاد احمد نے کوٹ لکھپت جیل میں رات ساڑھے دس بجے مجرم عمران کیخلاف تین بچیوں سے زیادتی اور قتل کے کیس کا فیصلہ سنایا، عدالت میں الگ الگ چالان پیش کئے گئے۔ عدالت میں پراسکیوٹرروف وٹو نے ملزم کے خلاف ثبوت پیش کیے۔ عدالت نے چالان آنے پر کیسوں کی کوٹ لک…	real
270	; پولیس کے مطابق ملزم نے عاصمہ کو گلا دبا کر قتل کرنے کے بعد جوہڑ میں پھنک دیا تھا۔ لوھراں پولیس نے حیدر کو 24 فروری کو حراست میں لیا۔ دوران تفتیش اس نے معصوم بچی کو زیادتی کے بعد قتل کر نے کا اعتراف کر لیا۔; تفصیلات کے مطابق لودھراں کی ننھی عاصمہ سے زیادتی اور اسے قتل کرنے والا درندہ صفت علی حیدر ڈی این اے ٹیسٹ کے لئے لاہور پہنچ گیا۔ ملزم کو لودھراں پولیس کی بھاری نفری کی تحویل میں لاہور لایا گی…	real
271	; نشتر پولیس سٹیشن میں درخواست جمع کرانے پر مقدمہ تو درج کر لیا گیا مگر تاحال کوئی ملزم گرفتار نہ ہو سکا۔; "اچھرہ کی رہائشی چار بچوں کی ماں کو ملزم عمران نے نوکری ک جھانسہ دیکر بلایا، متاثرہ خاتون کے مطابق ملزمان نے کیری ڈبہ میں بٹھا کر نشہ آور بوتل پلائی اور نامعلوم جگہ پر لے گئے۔ متاثرہ خاتون کا کہنا تھا کہ تین دن تک ملزم عمران سمیت تین ملزمان اسے زیادتی کا نشانہ بناتے رہے اور تین روز بعد مانگ…	real
272	; &amp;nbsp;; "واضح رہے 27 مارچ کو افسوسناک خبر سامنے آئی تھی کہ ڈیفنس میں ایک شخص نے دوستوں کے سامنے ڈانس نہ کرنے پر اپنی بیوی کو تشدد کا نشانہ بنایا اور سربھی مونڈ دیا جس کے بعد پولیس حرکت میں آگئی اور بیوی پر تشدد کرنے والے ملزم فیصل کو ساتھیوں سمیت گرفتار کرلیا، جن کا پولیس نے کل عدالت سے جسمانی ریمانڈ بھی حاصل کرلیا۔"; ; "رپورٹ میں بتایا گیا ہے کہ بائیں آنکھ میں سرخی مائل نشان ہےلیکن بینائی…	real
273	; "شیراکوٹ کے رہائشی 13 سالہ غلام عباس کا کہنا ہے کہ گھر آرہا تھا کہ اچانک دو اوباش لڑکوں نے پیسے دینے کی کوشش کی اور ساتھ چلنے کو کہا، جب غلام عباس نے انکار کیا تو زبردستی بے ہوش کرکے نامعلوم جگہ پر لے گئے، جہاں اس کے ساتھ جنسی زیادتی کی گئی۔"; "غلام عباس کے والد کا کہنا تھا کہ پولیس کی جانب سے پہلے تو مقدمہ ہی درج نہیں کیا جارہا تھا، جب مقدمہ درج کیا گیا تو ایک ملزم موقع پر گرفتار کر لیا گیا م…	real
274	; یہ خبر بھی پڑھیں: نامعلوم شخص نے35 سالہ خاتون کا گلا کاٹ دیا; سٹی 42 کے مطابق شہر میں بچیوں کے ساتھ زیادتی کے واقعات رک نہ سکے۔ ملزم زوہیب نے تیرہ سالہ بچی کو اسکے والد کا کہہ کر اپنے گھر بلایا اور زیادتی کے بعد تشدد کا نشانہ بنا ڈالا۔; زیادتی کے بعد ملزم فرار ہونے میں کامیاب ہو گیا۔ لڑکی کے ورثا کی درخواست پر متعلقہ پولیس نے واقعہ کا مقدمہ درج کر کے ملزم کی تلاش شروع کر دی ہے۔	real
275	; یہ بھی لازمی پرھیں۔۔۔غیر ملکی ماڈل انوکھا روپ دھارے عدالت میں پیش; ملزم کے خلاف سخت کارروائی تو ہورہی ہے لیکن کسی بھی مہذب اور تعلیم یافتہ معاشرے میں اس طرح کے واقعات نہیں ہونے چاہیں۔ اس نااخلاقی عمل سے بچوں کو محفوظ رکھنے کے لیے نہ صرف والدین بلکہ ریاست اور معاشرے کو بھی اپنا مثبت کردار ادا کرنا ہوگا۔; تفصیلات کے مطابق شہر میں معصوم کلیوں کے ساتھ زیادتی کے واقعات میں کمی نا آسکی۔ 8 سالہ سحرکو…	real
276	; یہ بھی پڑھیں: بچوں کے ساتھ ظلم و زیادتی میں لاہور کا پہلا نمبر; کورس میں بچوں کیساتھ زیادتی کے کیسز کی چلان تیار کرنے اور ملزمان کی تفتیش کے حوالے سے ٹریننگ دی جائے گی۔ ٹریننگ کا شیڈول پنجاب کے تمام ار پی اوز اور ڈی پی اوز کو بھجوا دیا گیا۔; "کورس 7 مئی کو اسلام آباد نیشنل پولیس اکیڈمی میں ہونگے۔ کورس کرنے والوں میں 2 ڈی ایس پیز، 13 انسپکٹرز، 2 سب انسپکٹرز اور 3 اسسٹنٹ سب انسپکٹرز شامل ہیں۔"; "…	real
277	; پولیس ریکارڈ کے مطابق لاہورسمیت صوبے بھر میں تیرہ سال سے کم عمر بچوں اور بچیوں کے ساتھ زیادتی کی ایف آئی آرزر جسٹرڈہوئیں۔ جس سے اندازہ ہوتا ہے کہ روزانہ صوبے بھرمیں چار بچے اور بچیوں کو درندگی کا نشانہ بنایا گیا۔; پولیس نے زینب قتل کیس کے بعد بھی کوئی سبق حاصل نہیں کیا۔ افسران کا کہنا ہے کہ بچوں سے زیادتی کے واقعات کی روک تھام کے لئے شہریوں کو بھی کرداراداکرنا ہو گا۔; دوسری جانب ساہیوال ریجن می…	real
278	; "پولیس نے کارروائی کرتے ہوئے ملزم شاہد بٹ اور میو ہسپتال سکیورٹی کے سپروائزر عاشق کو گرفتار کر لیا، پولیس کا کہنا تھا کہ ایک ملزم تاحال فرار ہے، اسے بھی جلد گرفتار کر لیا جائے گا، جبکہ گرفتار ملزمان کے خلاف مقدمہ درج کر کے تفتیش کی جارہی ہے۔"; "پولیس کے مطابق دو روز قبل آمنہ بی بی کی مدعیت میں گوالمنڈی پولیس سٹیشن میں میو ہسپتال کے تین ملازمین کے خلاف مقدمہ درج کیا گیا، آمنہ بی بی کا کہنا تھا ک…	real
279	; "اقبال ٹاؤن پولیس نے واقعہ کا مقدمہ پولیس اہلکاروں کے خلاف درج کر لیا، البتہ مقدمہ درج کرنے کے بعد بھی پولیس اہلکاروں کا تاحال کوئی سراغ نہیں لگا سکی، ڈی آئی جی انوسٹی گیشن کا کہنا ہے کہ ڈی ایس پی سی آئی اے علامہ اقبال ٹاؤن کی نگرانی میں دو ٹیمیں تشکیل دے کر ملزمان اہلکاروں کی گرفتاری کا ٹاسک دیا گیا ہے جنہیں جلد گرفتار کر لیا جائے گا۔"; "تفصیلات کے مطابق اقبال ٹاؤن کے علاقے کی رہائشی معذور خات…	real
280	; حامد کے والد نے پولیس کو اطلاع دی جس پر پولیس نے مقدمہ درج کرکے ملزمان کو حراست میں لے لیا۔; "پولیس کے مطابق چوہنگ کے علاقے میں 19 سالہ امین نامی ملزم نے چھ سالہ محمد حامد کو زیادتی کا نشانہ بنایا، محمد حامد کا کہنا تھا کہ وہ ملزم امین کے گھر اس کی بڑی بہن سے ٹیویشن پڑھنے جاتا تھا جہاں ملزم امین نے اس کے ساتھ زیادتی کی۔"	real
281	; بھٹہ مزدور کی معصوم بیٹی ماں باپ کا سہارہ بننے کی بجائے درندگی کا نشانہ بن گئی۔ورثا نے بتایا کہ اقرا لاہور میڈیکل سوسائٹی کے ڈاکٹر خلاد ربانی کے گھر کام کرتی تھی۔ ڈاکٹر کے بیٹے رضوان نے اقراء کو مبینہ طور پر زیادتی کا نشانہ بنایا۔ متاثرہ کی حالت غیر ہونے پر قریبی ہسپتال منتقل کیا گیا جہاں کئی دن زیرعلاج رہنے کے بعد وہ موت کے منہ میں چلی گئی۔	real
282	; ; "بیوی پر تشدد کرنے والے ملزم شوہر نے انکشاف کیا کہ صرف میں ہی نہیں اسما بھی آئس نشے کی عادی ہے، نشے کی زیادتی کے سبب ہوش کھو بیٹھا تھا، وقوعہ کی رات کیا کیا ؟ کچھ یاد نہیں۔"; "ذرائع کے مطابق ڈیفنس میں شوہر کا دوست کے ساتھ مل کر بیوی پر تشدد کے کیس میں اہم انکشافات سامنے آئے ہیں،پولیس کی تفتیش میں یہ بات سامنے آئی ہے کہ میاں بیوی دونوں آئس کے نشے کے عادی تھے،پولیس نے ملزم کا بیان بھی ریکارڈ ک…	real
283	; "سبزہ زار کے علاقے میں 3 دن قبل لاپتہ ہونے والے 7 سالہ بچے کے دلخراش قتل کا واقعہ پیش آیا۔ پولیس نے 7 سالہ آزان علی کی لاش کی گندہ نالے میں تلاش شروع کر دی۔ پولیس کے مطابق بچے کے قتل کا انکشاف زیرحراست ملزمان نے کیا ہے جبکہ ملزمان میں مقامی رکشہ ڈرائیور اور دکان دار شامل ہیں۔ قتل کی نشاندہی کرنے والا رکشہ ڈرائیور زیر حراست جبکہ دوکان دار تاحال مفرور ہے۔ انویسٹی گیشن آفیسر سبزہ زار کے مطابق مقد…	real
284	; عدالت نےملزم عاصم کی درخواست ضمانت منظورکرلی; "تفصیلات کے مطابق ملزم عاصم کا کہنا ہے کہ لڑکی نے فیس بک پر دوستی کی پھرشادی ہوگئی، میں نے خود کو امیر لڑکا ظاہر کیا تھا اور پھر حقیقت سامنے آنے پر لڑکی ناراض ہوگئی اور زیادتی کا مقدمہ درج کرا دیا۔"	real
285	; تفصیلات کے مطابق کم سن بچی کیساتھ زیادتی کا ایک اور افسوسناک واقعہ رائیونڈ میں پیش آیا۔ جہاں امین پورہ کی رہائشی سات سالہ بچی مسکان درندہ صفت دکاندار کی ہوس کا نشانہ بن گئی۔ ننھی بچی گھر سے سودا سلف لینے کیلئے دکان پر گئی جہاں نیامت نامی دکاندا راسے بہلا کر اپنے گھر لے گیا۔ ملزم نے مکان میں بچی کو تشدد کا نشانہ بنایا اور پھر ہوس کا نشانہ بناتا رہا۔; اہل علاقہ کے احتجاج کے بعد رائیونڈ سٹی پولیس …	real
286	; "تفصیلات کے مطابق پولیس کے مطابق میانی صاحب قبرستان میں عینی شاہدین کی اطلاع کے بعد 19 سالہ لڑکی کی لاش برآمد ہوئی، پوسٹ مارٹم کیلئے لڑکی کی لاش کو مردہ خانے منتقل کر دیا گیا ہے۔ جبکہ دوسری جانب ذرائع کے مطابق لڑکی کے پاس ہیروئن کی پڑیاں بھی برآمد ہوئیں ہیں، شبہ ہے کہ لڑکی کی ہلاکت نشے کی زیادتی کی وجہ سے ہوئی جس کی تصدیق پوسٹ مارٹم رپورٹ میں ہوگی۔"	real
287	; "تفصیلات کے مطابق آئی جی پنجاب کیپٹن ر عارف نوازکا کہنا ہے کہ پنجاب میں دہشت گردی پردوسرےصوبوں کی نسبت بہت حدتک قابو پالیاگیاہے۔ اگرکرائم کے حوالے سے بات کی جائے تو پنجاب میں ماضی کی نسبت30فیصدتک کرائم میں کمی واقع ہوئی ہے۔ دہشت گردی کے خاتمے میں سی ٹی ڈی، انٹیلی جنس اداروں اورپولیس کی جانب سے کیے گئےکومبنگ اورانٹیلی جنس بیسڈآپریشنز بہت موثرثابت ہوئے ہیں۔"; "ان کا مزید کہنا تھا کہ عمران جیسے وح…	real
288	; "پولیس کے مطابق اقراء سعید کے ساتھ زیادتی کے بارے میں حتمی رپورٹ پوسٹمارٹم کے بعد میں آئے گی۔ڈاکٹروں کے مطابق اقراء کی موت نشے کی زیادتی کے باعث ہوئی جبکہ موبائل فون سے ملنے والی معلومات پر عثمان، حسن اور عمر کیخلاف مقدمہ درج ہوا تو تینوں ملزمان نے عبوری ضمانتیں کروالی ہیں۔پولیس ذرائع کے مطابق اقراء سعید لاہور میں حسن بٹ ، عثمان اور عمر نامی افراد کے ساتھ رابطے میں تھی، جو گلشن راوی کے رہائشی ہ…	real
289	; "لاش کو پورسٹمارٹم کے لیے ہسپتال منتقل کردیا، مقامی افراد نے شبہ ظاہر کیا ہے کہ مقتول کو زیادتی کا نشانہ بنا کر سر میں اینٹوں کے وار کرکے قتل کیا گیا ہے جبکہ پولیس کا کہنا ہے کہ اصل حقائق فرانزک رپورٹ اور پوسٹ مارٹم کی رپورٹ آنے پر حقائق معلوم ہوں گے۔"; "رائےونڈ سٹی کے علاقے سندر روڑ کے رہائشی 15 سالہ وسیم جہانزیب کو قتل کردیا گیا۔ اہلخانہ کے مطابق وسیم گزشتہ رات گھر سے نکلا مگر واپس نہیں آیا، …	real
290	; "صنف نازک معاشرے کی روایتی بے حسی کاشکار رہی، پولیس کے اعدادوشمار کے مطابق پنجاب بھر میں ایک سونوے خواتین قتل ہوئیں، ایک سواکیاسی کو زیادتی اورانتالیس کو گھریلو تشدد کانشانہ بنایا گیا۔"; "دفاتر اوردیگر مقامات پر ہراساں کرنے کے چونتیس سو پانچ واقعات رپورٹ ہوئے، متعدد پرتیزاب پھینکا گیا، ڈی آئی جی آپریشنز وقاص نذیر کا کہنا ہے کہ خواتین پر تشدد کے واقعات میں سماجی وجوہات کی بنا پر اضافہ ہوا ہے۔"	real
291	; "لازمی پڑھیں: اولاد پیدا نہ کرنا جرم، شوہر کے تشدد سے بیوی ذہنی توازن کھو بیٹھی"; سٹی 42 نیوز ذرائع کے مطابق الخیام روڈ پر رات گئے ملک سونیہ نے بھتہ نہ دینے پر فائرنگ کردی۔ جس کے باعث راہگیر سمیت آٹھ افراد شدید زخمی ہوگئے۔ زخمیوں کو میو ہسپتال منتقل کیا گی۔ جہاں 4 کی حالت تشویشناک ہے۔; پڑھنا مت بھولئے: غیرت کے نام پر ایک اور بہن کا گھر اجڑ گیا; "زخمیوں میں محمد ریاض، حبیب، ایاز خان، ناصر، نوید…	real
292	; ; تفصیلات کے مطابق جنسی تشدد کےواقعات کی روک تھام کیلئے پولیس میں نیاسیل بنانے کا فیصلہ کیا گیا ہے۔; پولیس زرائع کے مطابق جنیڈروائلنس کےنام سے ہر ڈویژن میں سیل بنایا جائے گا۔ ایس ایس پی انویسٹی گیشن جینڈر وائیلنس سیل کے سربراہ ہوں گے جبکہ جینڈر وائلنس سیل خصوصاً بچوں کیساتھ زیادتی کی روک تھام کرےگا اور سیل ملزمان کوسزا دلوانے کیلئےعدالتی پراسس بھی مکمل کروائے گا اور سیل صوبے میں بڑھتے ہوئےجنسی …	real
293	; "تفصیلات کے مطابق مانگا منڈی کے علاقہ تالاب سرائے گاؤں میں 20 سالہ درندہ صفت انسان کی5 سالہ بچے سے زیادتی کی کوشش کا معاملہ سامنے آیا ہے۔ ملزم عمر ولی5 سالہ علی عباس کو دکان سے اٹھا کر کھیتوں میں لے گیا۔ ملزم نے علی عباس سے مبینہ زیادتی کی کوشش کی ، بچے کے شور مچانے پر مقامی افراد نے ننھے بچے کی جان بچائی اور ملزم کو پکڑ کر پولیس کے حوالے کر دیا۔"	real
294	; "سٹی42 کے مطابق ایم بی اے فنانس کی طالبہ کو فیصل آباد سے لاہور آکر دوست سے ملاقات مہنگی پڑگئی، نتاشا دریائے راوی میں پُراسرار طور پر گر کرجاں بحق ہوگئی۔ چوبیس سالہ لڑکی کو زخمی حالت میں میوہسپتال منتقل کیا گیا مگر وہ جانبرنہ ہوسکی۔اطلاع ملنے پرلڑکی کے والدین لاہور پہنچ گئے مگر بدنامی کے ڈر سے قانونی کارروائی سے انکارکردیا۔ذرائع کے مطابق پولیس نے شک کی بنا پر انجینئرنگ یونیورسٹی کے طالب علم شان …	real
295	; "اہل علاقہ اور لواحقین کی جانب سے لاش بابو صابو بند روڈ پر رکھ کر شدید احتجاج کیا جارہا ہے، ورثا نے چیف جسٹس پاکستان ثاقب نثار اور وزیر اعلیٰ پنجاب عثمان بزدار سے انصاف کی اپیل کی."; "تفصیلات کے مطابق دو روز قبل شیرا کوٹ میں ناظم شیخ نامی شخص نے 7 سالہ بچے سلمان کو زیادتی کا نشانہ بنانے کے بعد چھریوں کے وار کرکے زخمی کردیا تھا، زیادتی کا نشانہ بننے والا معصوم بچہ آج ہسپتال میں زخموں کی تاب نہ …	real
296	; "بیگم کوٹ کے رہائشی مظاہرین کا کہنا تھا کہ ان کی بچی کے ساتھ زیادتی کرنے والے ملزم کو گرفتار کر لیا گیا ہے، مگر اب پولیس کی جانب سے ان پر صلح کیلئے دباؤ ڈالا جارہا اور نامعلوم افراد انھیں فون کر کے دھمکیاں دے رہے ہیں۔"; مظاہرین نے مطالبہ کیا ہے کہ گرفتار ملزم کے خلاف سخت کارروائی کی جائے اور ان پر دباؤ ڈالنے والوں کے خلاف بھی قانونی کارروائی عمل میں لائی جائے۔; مظاہرین نے احتجاج کرتے ہوئے پولیس…	real
297	; ; یہ خبر بھی پڑھیں : زینب کے قاتل کو سرعام پھانسی دی جائے: لاہور ہائیکورٹ میں درخواست دائر; پولیس کے مطابق کوٹ لکھپت کے رہائشی نے تھانہ کوٹ لکھپت پولیس کو اطلاع دی کہ اس کی سات سالہ بیٹی سبین گھر کے قریب ہی ٹیوشن پڑھنے جاتی تھی جہاں عدیل نامی ملزم نے اس سے کئی بار زیادتی کی کوشش کی۔ بیٹی نے گذشتہ روز گھر آ کر والدین کو بتایا تو انہوں نے پولیس کو اطلاع دی جس پر پولیس نے مقدمہ درج کر کے ملزم عدیل…	real
298	; "تفصیلات کے مطابق لاہور بارہ دری میں10سالہ بچی سےزیادتی کی کوشش کرنےوالاملزم عوام کے ہتھے چڑھ گیا، شہریوں نے ملزم کی خوب درگت بنائی اورپولیس کے حوالے کردیا۔"; متاثرہ بچی کا کہنا ہے کہ آنکل مجھے چیز لے کر دینے کے بہانے یہاں لے کے آئے تھے۔ ملک پارک کا اصغرگلی میں کھیلتی بچی کو ورغلا کرساتھ لے گیا۔	real
299	; وکرم کی بہن کا کہنا تھا کہ ملزمان نے پہلے اہل خانہ کو تشدد کا نشانہ بھی بنایا اور پھر فائرنگ کر دی۔ اہل خانہ کا مطالبہ ہے کہ ملزمان کو گرفتار کیا جائے۔ پولیس نے مقتول و کرم کی لاش کو پوسٹمارٹم کیلئے مردہ خانے منتقل کر دیا ہے۔ پولیس کا کہنا ہے کہ ملزمان کو جلد گرفتار کیا جائیگا۔; سٹی42 کے مطابق واقعہ کے عینی شاہد اشرف کا کہنا تھا گھر کی بالائی منزل پر رہائش پذیر تین لڑکوں کو موٹرسائیکل گھر کے صح…	real
300	; "سونیا کو ہسپتال منتقل کیا جہاں چند روز زیر علاج رہنے کے بعد وہ گزشتہ روزدم توڑ گئی، اہلخانہ کا کہنا ہے کہ جب سے سونیا کی شادی ہوئی تب سے اسکا خاوند اور دیگر سسرال والے تشدد کا نشانہ بنا رہے ہیں، مظاہرین نے پولیس کے خلاف نعرے بازی کی اور لاش فیروز پور روڈ پر رکھ کربلاک کر دی،مظاہرین کا کہنا تھا کہ پولیس واقعہ کا مقدمہ درج نہیں کر رہی، پولیس نےموقع پر پہنچ کر لواحقین سے مذاکرات کے بعد لاش پوسٹما…	real
301	; "تفصیلات کے مطابق ملتان روڈپر نامعلوم افراد نےر اہگیر خاتون اور بچے پر چھری سے حملہ کردیا جس کے نتیجے میں خاتون اور بچہ شدید زخمی ہوگئے، واقعہ کی اطلاع ملتےہی ریسکیو عملہ اور پولیس اہلکار جائے وقوعہ پر پہنچے، ریسکیو ذرائع کا کہنا تھاکہزخمی خاتون اور بچے کو ہسپتال منتقل کر دیا گیا۔"; "واقعہ کے بعد ملزم فرار ہوگیا جبکہ پولیس کاکہناتھاکہ ملزم کی تلاش جاری ہے اور جلد قانون کی گرفت میں ہوگا، جبکہ مت…	real
302	; "اہلخانہ کے مطابق معمولی تلخ کلامی پر نوجوان آپے سے باہر ہوگئے، انہیں شراب پی کر گلی میں کھڑا ہونے سے منع کیا تھا۔ نوجوانوں کی جانب سے اہلخانہ پر تشدد کی ویڈیو بھی منظر عام پر آگئی ہے۔دوسری جانب متاثرہ خاندان کا کہنا ہے کہ ملزمان کی جانب سے مقدمہ واپس لینے کیلئے دھمکایا جارہا ہے، پولیس تحفظ فراہم کرے۔پولیس کے مطابق متاثرہ خاندان کی مدعیت میں عثمان، فیصل اور قیصرسمیت 4 نامعلوم افراد کیخلاف مقدمہ…	real
303	; "پولیس کے مطابق انھیں اطلاع ملی کہ مسلم ٹاؤن کے علاقے میں نہر کنارے ایک گداگر بچی کی لاش ملی ہے، جس پر پولیس نے موقع پر پہنچ کر شواہد اکٹھے کیے اور لاش کو تحویل میں لے کر پوسٹمارٹم کے لیے مردہ خانے منتقل کر دیا۔"; پولیس کا کہنا تھا کہ لاش پر کسی قسم کے تشدد کے نشان موجود نہیں ہیں پوسٹمارٹم رپورٹ کے بعد ہی حقائق سامنے آئیں گے۔	real
304	; "جنگلے کے ساتھ بندھے اس شخص کا کہنا تھا کہ وین نہ روکنے پر ٹریفک وارڈن نے اسے روکا، جس کے بعد وارڈن نے اسے مبینہ طور پر تشدد کا نشانہ بنایا اور غصہ ٹھنڈا نہ ہوا تو جنگلے کے ساتھ باندھ دیا۔ جنگلے کے ساتھ بندھے شخص کی چیخ و پکار سن کر موقع پر موجود شہری اکٹھے ہو گئے جنہوں نے واقعہ کی اطلاع پولیس اسٹیشن دی جس پر ڈولفن اور شاہدرہ ٹاؤن پولیس کے اہلکار موقع پر پہنچے اور رسیوں کے ساتھ بندھے شخص کو کھ…	real
305	; "اسلامپورہ پولیس کے مطابق ورکشاپ چوک سگیاں کے قریب وارڈن نوید نے قوانین کی خلاف ورزی پر موٹرسائیکل سواروں کو روکا، موٹرسائیکل سواروں نے کاغذات دینے سے انکار کرتے ہوئے موٹرسائیکل کو سڑک کے درمیان میں کھڑا کر دیا اور وارڈنز کے ساتھ گالم گلوچ کرنا شروع کردی، وارڈن کی درخواست پر پولیس نے ملزمان کو گرفتار کرلیا۔"; مقدمہ درج ہونے کی رنجش میں وائس چیئرمین یو سی 66 عمران اپنے 10 سے 15 ساتھیوں کے ہمراہ …	real
306	; رکشہ ڈرائیور نے مزید بتایا کہ مجھے روک کرباقی گاڑیوں کوجانے دیا گیا۔ میں نےکہا سارا قانون غریبوں کیلئے ہے تووارڈنز سیخ پا ہوگئے۔ تشدد کرنیوالےوارڈنزکےخلاف پولیس کودرخواست دیدی ہے۔; یہ بھی پڑھیں:محکمہ صحت میں سرعام کرپشن; سٹی 42 ذرائع کے مطابق : قربان لائنزپر ٹریفک وارڈنز نے رکشہ ڈرائیورپر تشدد کیا۔رکشہ ڈارئیور عثمان کا کہنا تھا کہ وارڈنزنے تھپڑ اوروائرلیس سیٹ سر پر مارا۔ سروس لائن پرکھڑا تھا وا…	real
307	; "تفصیلات کے مطابق کاہنہ کے علاقہ مکینوں نے گندے نالے میں ایک شخص کی تیرتی ہوئی لاش دیکھی تو انہوں نے ریسکیو 1122 اور پولیس کو اطلاع دی، اطلاع ملنے پر ریسکیو اہلکار اور پولیس موقع پر پہنچ گئی اور لاش نالے سے باہر نکال لی۔پولیس اور فرانزک ماہرین نے جائے وقوعہ سے شواہد اکھٹے کر کے لاش کو پوسٹمارٹم کیلئے ہسپتال منتقل کر دیا۔"	real
308	; اس خبرکو بھی ضرور پڑھیں:روحانی باپ کا بچے پر جان لیوا تشدد; ; ; تھانہ کاہنہ کے علاقہ جھلکے کے کامریڈ ماڈل ہائی سکول میں آٹھ سالہ افضل اکبرکوسبق یاد نہ کرنے پرمبینہ طور پر اسکے پرنسپل نصیراورٹیچرنیلم نے تشددکا نشانہ بنایا۔ افضل کے والداکبر نےتھانہ میں دونوں کے خلاف اندراج مقدمہ کے لیے درخواست دے دی ہے اور موقف اختیار کیا ہے کہ افضل کے جسم پر تشدد کے واضح نشانات بھی موجود ہیں اور افضل کا کہنا ہے …	real
309	; پولیس کے مطابق محمد نذیر کی لاش اس کے گھر سے برآمد ہوئی محمد نذیر کے لواحقین کا کہنا تھا کہ ہارٹ اٹیک کی وجہ سے اس کی موت ہوئی ہے۔; "متوفی کی جسم پر کسی قسم کے تشدد کا نشان موجود نہیں، پولیس نےلاش کو پوسٹمارٹم کے لیے مردہ خانے منتقل کر دیا ہے، پولیس کا کہنا تھا کہ محمد نذیر کی موت کے حقائق پوسٹمارٹم کے بعد ہی واضع ہوں گے۔"	real
310	; "پولیس کے مطابق یونیورسٹی آف انجینئرنگ اینڈ ٹیکنالوجی کے باہر گرین بیلٹ سے نوجوان کی لاش برآمد ہوئی ہے، جس کی عمر تقریبابائیس سال معلوم ہوتی ہے، نوجوان کی شناخت تاحال نہیں ہوسکی۔پولیس کا کہنا تھا کہ نوجوان شکل سے نشئی بھی معلوم نہیں ہوتا اور نہ ہی لاش پر کسی قسم کے تشدد کے نشان موجود ہیں، لاش کو پوسٹمارٹم کے لیے مردہ خانے منتقل کردی گئی ہے، جبکہ مزید حقائق پوسٹمارٹم رپورٹ آنے کے بعد ہی سامنے…	real
311	; "تفصیلات کے مطابق ہربنس پورہ میں واقع عمل سکول کے استاد نے طالبعلم سعد ریاض کو تشدد کا نشانہ بنایا، طالعلم سعد کے بھائی کے مطابق استاد کاشف نےطالبعلم سعد ریاض کا سر دیوار سے مارا جس کے باعث وہ زخمی ہوگیا۔ سعد کے بھائی کے مطابق واقع میں ملوث ٹیچر کے خلاف اندراج مقدمہ کے لئے ہربنس پورہ پولیس کو درخواست دے دی گئی ہے۔"	real
312	; "پولیس کےمطابق انہیں اطلاع ملی کی کہ اسلام پورہ کےعلاقے میں نامعلوم شخص کی لاش ملی ہے، جسے تحویل میں لے لیا گیا ہے۔ پولیس کا کہنا تھا کہ متوفی کے جسم پر کسی قسم کے تشدد کا نشان موجود نہیں ہے۔"; "لاش کو پوسٹمارٹم کے لیے مردہ خانے منتقل کر دیا گیا ہے، پوسٹمارٹم رپورٹ آنے کے بعد ہی مزید حقائق سامنے آئیں گے۔"	real
313	; "یہ خبر بھی پڑھیں: بجلی کے بل پر تنازعہ،2بھائیوں میں ہونے والےجھگڑے نے ایک کی جان لے لی"; لواحقین کا کہنا تھا کہ شالیمار تھانے کی پولیس نے تاحال ان کی ایف آئی درج نہیں کی اور نہ ہی ملزم کے خلاف کوئی کارروائی کی ہے۔ لواحقین کا مطالبہ ہے کہ امام مسجد کو جلد گرفتار کر کے سخت سے سخت سزا دی جائے۔; "سٹی 42 کے مطابق عبدالاحد کے لواحقین کا کہنا تھا کہ امام مسجد نے عبدالاحد کو موبائل بیلنس نہ کرانے پر …	real
314	; "تفصیلات کے مطابق سوتیلی مائوں کے بچوں پر ظلم کی خبریں اکثر سننے میں آتی رہتی ہیں پتہ نہیں کب لوگوں کی سوچ بدلے گی، آج باغبانپورہ میں سوتیلی ماں نے 14 سالہ بیٹی سحرش کو زنجیروں کے ساتھ باندھ کر تشدد کا نشا نہ بنایا ۔ لڑکی کی چیخ و پکار پر اہل علاقہ اکٹھے ہوگئے اور پولیس کو اطلاع دی۔ اطلاع ملنے پر پولیس موقع پر پہنچ گئی اور بچی کو بازیاب کروالیا۔ پولیس نے بچی کو تحویل میں لے کر تحقیقات کا آغا…	real
315	; "دوسری جانب سندر کی حدود موہلنوال کے علاقے سے 35سالہ شخص کی لاش برآمد ہوئی جس کی شناخت نہیں ہوسکی، پولیس نے ضروری کارروائی کے بعد لاش پوسٹ مارٹم کے لئے مردہ خانے منتقل کر دی ہے۔"; "پولیس کے مطابق کاہنہ کے علاقے پانڈوکی میں کھیتوں سے نامعلوم بیس سالہ لڑکی کی تشدد زدہ لاش برآمد ہوئی، پولیس کا کہنا ہے کہ لڑکی کو کسی اور مقام پر قتل کر کے لاش کھیتوں میں پھینکی گئی۔ پولیس نے موقع سے شواہد اکٹھے کر …	real
316	; گورنرپنجاب چودھری محمد سرور کا کہنا ہے کہ جامعہ میں غنڈہ گردی برداشت نہیں کی جائے گی۔; دوسری جانب گورنر پنجاب نے پنجاب یونیورسٹی میں نوجوان طالبعلم پر مبینہ تشدد کا نوٹس لے لیا جبکہ وائس چانسلر نےانکوائری کمیٹی تشکیل دیتے ہوئے واقعہ کی مکمل رپورٹ طلب کرلی ہے۔; "تفصیلات کے مطابق گزشتہ رو زپنجاب یونیورسٹی میں اویس نامی طالبعلم کا اپنی اہلیہ کے ساتھ بیٹھ کر کھانا اور بات چیت کرنا جرم بن گیا، طلبا …	real
317	; "تفصیلات کے مطابق ریس کورس پولیس کے اہلکاروں نے والدہ کی ادویات لینےآئےنوجوان کوہزاروں روپےکاٹیکہ لگا دیا، ریس کورس پولیس کےاہلکاروں نے موٹرسائیکل سوار کامران کو چیکنگ کے بہانے روکا اور پھر پیسوں کا مطالبہ کیا جبکہ اس دوران پولیس اہلکاروں نے نوجوان پر تشدد بھی کیا اور مزاحمت کرنے پر اہلکاروں نے تشدد کرتے ہوئے سر بھی پھاڑ دیا ۔"; ڈی آئی جی آپریشنز کا کہنا تھا کہ ذمےدار افراد کے خلاف سخت قانون…	real
318	; "تفصیلات کے مطابق ڈیفنس بی کے علاقے میں پولیس ایک ملزم کی تلاش میں دیواریں پھلانگ کر بیوہ کے گھر داخل ہوگئی، اہلکاروں نے گھر میں موجود خواتین کی ایک نہ سنی اور سامنے آنیوالی خواتین کو تشدد کا نشانہ بھی بناتے رہے۔ پولیس اہلکاروں کی گھر میں گھسنے کی ویڈیوبھی منظر عام پر آ گئی۔"; "بیوہ خاتون کے داماد کی تلاش میں پولیس بغیر خواتین اہلکاروں کے گھر میں داخل ہوئی، اہل خانہ کے مطابق اہلکاروں نے گھر کے…	real
319	; نصیر آباد پٹھان کالونی کے علاقے میں دو روز قبل خواتین پولیو ورکرز پر بھی نامعلوم افراد نے تشدد کیا اور جان سے مارنے کی دھمکیاں بھی دیں۔ پولیو ورکرز نے کام کرنے سے انکار کیا تو پولیس اور رینجرز کی جانب سے انھیں سیکورٹی فراہم کی گئی جس پر پولیو ورکرز نے دوبارہ کام شروع کیا۔; "پولیو ٹیم پر بہیمانہ تشدد کا ایک اور واقعہ نصیرآباد کے علاقے پٹھان کالونی میں ہوا جس میں دو پولیو ورکز محسن اور وقاص پر …	real
320	; سٹی فورٹی ٹو نے معاملہ کی نشاندہی کرکے متاثرہ بچی کو چائلڈ پروٹکشن بیورو کے حوالے کر دیا۔ چائلڈ پروٹکشن بیورو حکام کا کہنا ہے کہ بچی کے والدین کو ٹریس کر کے مالکان کی نشاندہی کرتے ہوئے قانونی کاروائی عمل میں لائی جائے گی اور بچی کی کفالت کا فیصلہ عدالت کرے گی۔; سٹی 42 کے مطابق نارووال کی رہائشی چھ سالہ گڑیا کو اس کے والدین نے لاہور میں ملازمت پر رکھوا کر اسکی تنخواہ وصول کرلی جبکہ مالکان بچی کو…	real
321	; تفصیلات کے مطابق مقدمہ فاطمہ کی سہیلی فوزیہ کوثر کی مدعیت میں تھانہ غازی آباد میں درج کیا گیا جس کے مطابق فاطمہ کے سسرالی جن نکلنے کے بہانے تشدد کرتے رہے جس سے اسکی حالت خراب ہو گئی جس کو طبی امداد کے لیے سروسز ہسپتال منتقل کیا گیا۔پولیس کا کہنا ہے کہ ملزمان کی گرفتاری کے لیے چھاپے مارے جا رہے ہیں تاہم ملزمان تاحال فرار ہیں جن کو جلد گرفتار کر لیا جائے گا۔ پولیس کا یہ بھی کہنا تھا کہ فاطمہ کو ا…	real
322	; تفصیلات کے مطابق سیالکوٹ سے تعلق رکھنے والی روزینہ لاہور میں یو ایم ٹی میں میڈیکل کی تعلیم حاصل کر رہی تھی اور جوہر ٹاؤن کے نجی ہوسٹل میں رہائش پذیر تھی۔ اس کی روم میٹ گھر سے واپس آئی تو اس نے روزینہ کو مردہ حالت میں پا کر پولیس کو آگاہ کیا۔ پولیس کے مطابق پراسرار طور پر جاں بحق ہونے والی طالبہ کے جسم پر تشدد کے نشانات موجود نہیں ہیں۔ تھانہ ٹاؤن شپ پولیس نےہوسٹل کے مالک اور ساتھ کمروں میں موجود…	real
323	; سات سال سے تشدد کا نشانہ بننے والی سعدیہ نے حکام سے اپیل کی ہے کہ اسکو انصاف دلایا جائے جبکہ بوڑھے والد کا کہناہے کہ آئے روز پیسے دینے کے باجود اسکا خاوند اور سسرال والے اس پر تشدد کرتے ہیں۔; ذرائع کے مطابق سعدیہ بی بی کو ماں باپ سے پیسے نہ لا کر دینے پر سسرالیوں نے بہیمانہ تشددکا نشانہ بنایا۔ سعدیہ کی شادی کو سات سال گزر چکے ہیں اور چار بچے ہیں مگر پھر بھی اس کے سسرال والوں نے ڈنڈوں اور چھری س…	real
324	; پولیس کے مطابق دھرم پورہ کے قریب ٹریفک وارڈن نے نہر میں بہتی ہوئی لاش کو دیکھا تو اطلاع پر پولیس اور ریسکیو نے موقع پر پہنچ کر لاش کو پانی سے نکالا۔ پولیس کا کہنا تھا کہ لاش کی شناخت نہیں ہوسکی۔ متعلقہ ایس ایچ او کا کہنا تھا کہ لاش کی حالت دیکھ کر یوں لگتا ہے جیسے لاش دو دن سے پانی میں تھی کیونکہ پولیس اہلکاروں نے جیسے ہی لاش کو پانی سے نکال کر دھوپ میں رکھا تو جسم پر سے جلد اترنا شروع ہوگئی۔; …	real
325	; "متاثرہ شہری نے ون فائیو پر کال کی جس پر پولیس بھی موقع پر پہنچ گئی لیکن پولیس اہلکاروں نے موقع پر اپنے پیٹی بھائی کو کچھ نہ کہا اور چلے گئے، متاثرہ شہری نے اعلیٰ افسران سے اس واقعہ کا نوٹس لینے کی اپیل کردی۔گلبرگ میں رشوت لینے کی ویڈیو بنانے پر پولیس اہلکار آپے سے باہر ہوگیا، ویڈیو ڈلیٹ نہ کرنے پر چوکی فردوس مارکیٹ میں تعینات مدثر نامی پولیس اہلکار نے نہ صرف شہری پر بہیمانہ تشدد کیا بلکہ اسکا …	real
326	; مدعی کا کہنا تھا کہ اس کی اپنی بیوی سے معمولی لڑائی ہوئی تھی وہ ناراض ہو کر اپنے والد کے گھر چلی گئی۔ تھوڑی دیر بعد سالے آئے اور اس پر چھریوں سے حملہ کر دیا۔ عدالت نے 29 مئی کیلئے تھانہ ہربنس پورہ کے تفتیشی افسر سے رپورٹ طلب کر لی ہے۔; سٹی 42 ذرائع کے مطابق ملزم اسد خان اور نعیم خان کیخلاف رواں سال اپریل میں تھانہ ہربنس پورہ میں مقدمہ درج ہوا۔ ملزمان نے اپنی بہن کے شکایت کرنے کرنے پر طیش میں ا…	real
327	; پولیس کے مطابق ساندہ کے علاقے میں جاں بحق ہونے والے شخص کی شناخت محمد نذیرکے نام سے ہوئی ہے۔ نذیر کے جسم پر تشدد کے نشانات موجود ہیں جس سے پولیس کو شک ہے کہ نذیر کو قتل کیا گیا ہے۔ مقتول کی جیب سے موبائل اور پیسے بھی برآمد ہوئے ہیں۔	real
328	; "سسرالیوں کے مبینہ تشدد سے 26 سالہ سونیا کی ہلاکت پر ورثا نے جنرل ہسپتال کے سامنے احتجاجی مظاہرہ کیا، سونیا کےلواحقین کا کہنا تھا کہ متوفیہ کو اس کے شوہر اور سسرالیوں نے تشدد کا نشانہ بنانے کے بعد زہریلی گولیاں کھلائیں اور بعد میں جنرل ہسپتال منتقل کر دیا اور پھر خودکشی کا ڈرامہ رچایا گیا۔"; 2 بچوں کی ماہ سونیا کی 4 سال قبل شادی ہوئی تھی جبکہ پولیس کی جانب سے کارروائی نہ کرنے پر سونیا کے ورثاء …	real
329	; پولیس کے مطابق ملزمان کو گرفتار کر لیا گیا ہے۔ ملزموں کے خلاف مقدمہ درج کر کے مزید کارروائی کی جا رہی ہے۔; پولیس کے مطابق مصطفیٰ ٹاؤن کے علاقہ وحدت روڑ پر واقع انس شادی ہال میں رسموں کی ادائیگی کے دوران باراتی آپس میں الجھ پڑے۔ اس دوران تشدد اور فائرنگ کے باعث چار افراد شدید زخمی ہو گئے۔ جنہیں ریسکیو ٹیموں نے جناح ہسپتال منتقل کر دیا۔; "یہ بھی پڑھیں: کسٹمز اینٹی سمگلنگ کی بڑی کارروائی،سمگل شدہ…	real
330	; بتایا گیا ہے کہ شفیق آباد کے علاقہ گلی نمبر 3 کچا راوی روڈ کی ممتاز بی بی نے گزشتہ روز پھندہ لیکر خودکشی کی کوشش کی جس پر بیٹی شازیہ بی بی نے شور مچاتے ہوئے بچانے کی کوشش کی۔ شور کی آواز سن کر اہل محلہ بھی اکھٹے ہوگئے جنہوں نے خاتون کو خودکشی سے روک لیا۔ واقعے کے بعد بیٹی شازیہ بی بی نے تھانہ شفیق آباد تھانے میں اپنے بھائیوں کے خلاف اندراج مقدمہ کی درخواست دیتے ہوئے موقف اختیار کیا ہے کہ اس کے …	real
331	; "پولیس کے مطابق گرین ٹاؤن کے علاقے میں وسیم نامی شہری نے اپنی سابقہ بیوی ارم کو اپنے گھر بلایا اور تلخ کلامی پر اس پر تشدد کیا۔ متاثرہ خاتون کا کہنا تھا کہ ایک مہینہ قبل اس کے شوہر وسیم نے اسے طلاق دے دی تھی، گزشتہ روز وسیم نے فون کر کے ارم کو اپنے گھر بلایا اور کہا کہ اپنے بچوں کو لے جاؤ، ارم جب اپنے سابقہ خاوند وسیم کے گھر پہنچی تو وسیم نے اس پر تشدد کیا اور اسے گھر سے نکال دیا۔"; متاثرہ خاتو…	real
332	; سٹی 42 ذرائع کے مطابق 30 سالہ نازیہ کو شدید زخمی حالت میں اوکاڑہ سے لاہور جنرل ہسپتال لایا گیا۔نازیہ کے والد کے مطابق عید کے دن کھانا اچھا نہ بنانے پر اس کے شوہر اور سسرالیوں نے کلہاڑیوں اور چھریوں کے وار سے اسے تشدد کا نشانہ بنایا۔جس سے نازیہ کے سر اور جسم پر گہری چوٹیں آئیں۔; یہ بھی دیکھیں:; 8 بیٹیوں کے بے بس باپ کا کہنا تھا کہ انصاف کے لئے در بدر کی ٹھوکریں کھا رہا ہے لیکن متعلقہ پولیس کے پا…	real
333	; تفصیلات کے مطابق گرین ٹاؤن کے علاقے میں واقع ایک گھر کی چھت سے نوجوان لڑکے کی نعشملی ہے جسے دیکھتے ہی مالک مکان نے پولیس کو اطلاع دی ۔ اطلاع ملنے پر پولیس جائے وقوعہ پر پہنچ گئی اور نعش کو تحویل میں لے کر پوسٹمارٹم کیلئے مردہ خانے منتقل کردیا۔; "پولیس کا کہنا ہے کہ ظاہری طور پر جسم پر تشدد کے نشانات موجود نہیں ہیں۔ پوسٹمارٹم کے بعد موت کی وجوہات کا تعین ہو سکے گا، نوجوان کی شناخت سعود کے نام سے…	real
334	; 8 سالہ کلثوم کے والد کا کہنا تھا کہ ملزمان کے خلاف سخت سے سخت کارروائی کی جائے تاکہ آئندہ کسی کی بیٹی کے ساتھ ایسا واقعہ نہ ہو۔; کلثوم کے والد کا کہنا تھا کہ ایک ماہ قبل کلثوم کو عباس کے گھر پر تین ہزار روپے ماہانہ تنخواہ پر کام کیلئے بھیجا تھا۔ پولیس نے کلثوم کو چائلڈ پرٹیکشن بیورو کے حوالے کرکے ملزمان کے خلاف مقدمہ درج اور ملزم عباس کو گرفتار کر لیا ہے۔; "جوہر ٹاؤن میں شہری عباس کے گھر تین ہز…	real
335	; گھر پہنچ کر بچے نے تمام ماجرہ والدین کو بتایا جس پر والدین تھانے پہنچے اور رپورٹ درج کروائی۔ میڈیا پر خبر چلنے کے بعد ڈی ایس پی موقع پر پہنچے۔ جس پر اہلعلاقہ نے شدید احتجاج کیا اور پولیس مخالف نعرے بھی لگائے۔; "سٹی42 نے ایس پی صدر سے بات کی تو انکا کہنا تھا کہ متعلقہ اہلکاروں کو معطل کر دیا گیا ہے۔ بچے کے میڈیکل ٹیسٹ کے بعد جو بھی ذمہ دار ہوا، اس کے ساتھ مجرموں والا سلوک کیا جائے گا۔"; "دو پولی…	real
336	; "پولیس نے مالک مکان افضل کے بیٹے لقمان کو حراست میں لے لیا۔پولیس کے مطابق عابد کالونی میں مالک مکان ملک افضل کا کرایہ ادا نہ کرنے پر عابد سے جھگڑا ہوا، عابد کی والدہ جھگڑا چھڑوانے لگی تو ملک افضل نے اس پر تشدد کیا جس سے خاتون شدید زخمی ہوگئی، زخمی خاتون کو جناح ہسپتال منتقل کیا گیا جہاں وہ زخموں کی تاب نہ لاتے ہوئے دم توڑ گئی۔"	real
337	; "زمانہ بدل گیا لیکن لاہورپولیس نے پرانی روش نہ چھوڑی۔ تھانہ مغلپورہ پولیس کے اے ایس آئی سنی نے 9 ساتھیوں کے ہمراہ عباس علی نامی شہری کے گھر پر دھاوا بول دیا، خواتین سمیت اہلخانہ کو بہیمانہ تشدد کا نشانہ بنایا جبکہ پولیس کی مبینہ فائرنگ سے امیر حمزہ نامی شخص زخمی ہوگیا جسے ہسپتال منتقل کر دیا گیا۔"; تھانہ مغلپورہ میں عباس علی کی مدعیت میں اے ایس آئی سنی اور 9 دیگر اہلکاروں کے خلاف مقدمہ درج کر …	real
338	; "بعد ازاں 13 سالہ اقصی کو بے ہوشی کی حالت میں مقامی ہسپتال میں منتقل کر دیا گیا، ملزمان میں امین، صدیق، رفیق اور راشد شامل ہیں جنہیں تھانہ مناواں کے حوالے کر دیا گیا ہے۔"; ; پولیس کے مطابق اطلاع موصول ہونے پر مناواں میں ڈولفن سکواڈ نے کارروائی کرتے ہوئے چار اوباشوں کو گرفتار کرلیا۔ ملزمان نے 13 سالہ معصوم بچی کو جنسی تشدد کا نشانہ بنایا تھا۔ بچی مقامی بھٹہ خشت پر کام کرتی ہے جبکہ بچی کو اوباشوں…	real
339	; "پڑھنا مت بھولئے:ٹاؤن شپ میں پٹرول پمپ پر مسلح افراد کا دھاوا، فوٹیج منظر عام پر آگئی"; "چندروز قبل اللہ رکھی کے شوہر نے اسے بد ترین تشدد کا نشانہ بنایا۔ جس کے باعث مظلومہ کے گھر والوں نے تھانہ اچھرہ میں رپوٹ کروائی، لیکن حبیب اللہ قانونی کاروائی سے بچتے ہوئے لاہور سے فرار ہو گیا۔"; یہ بھی ضرور پڑھیں: غیرت کے نام پر ایک اور بہن کا گھر اجڑ گیا; "دوسری جبکہ اللہ رکھی مینٹل ہاسپٹل لاہور میں ذہنی …	real
340	; پولیس کے مطابق 7 سالہ جنید ضلع گجرات کے علاقہ لالہ موسیٰ کا رہائشی تھا اور ایک سال سے باغبانپورہ کے علاقے میں واقع مدرسہ میں تعلیم حاصل کر رہا تھا۔ جہاں قاری فیض الرحمان نے 7 سالہ جنید کو مبینہ تشدد کا نشانہ بنایا۔ جس پراس کی حالت بگڑ گئی۔ جس کو تشویشناک حالت میں ہسپتال منتقل کیا گیا۔ مگر جنید جانبر نہ ہو سکا۔ جنید کے اہل خانہ نے لاش پریس کلب کے باہر رکھ کر انصاف کے حصول کے لیے احتجاج کیا تو وز…	real
341	; تفصیلات کے مطابق شہری ندیم احمد مرزا نے بتایا کہ اس کی بیوی طاہرہ نے اپنی مرضی سے طلاق لی۔ بعد ازاں بچوں کے ساتھ رہنے کیلئے اصرار کرتی رہی۔ بچوں کو ساتھ لے جانے کی رضا مندی پر طاہرہ سابق خاوند اور بچوں کے ساتھ رہنے کیلئے بضد رہی۔ جس پر شہری ندیم نے اجازت دے دی۔; یہ بھی ضرور پڑھیں:رمضان المبارک میں ناجائز منافع خور مافیہ شہریوں کو بخشنے کیلئے تیار نہیں; شہری ندیم احمد مرزا نے الزام لگایا کہ اس ک…	real
342	; ندیم عباس بارا کے وکیل آفتاب باجوہ نے عدالت کو آگاہ کیا کہ فائرنگ کا واقعہ کسی اور جگہ پیش آیا لیکن پولیس اور ملزمان گرفتار کر لئے۔ متعلقہ ایس پی نے ذاتی رنجش پر نومنتخب ایم پی اے ندیم بارا اورساتھیوں پر جھوٹا مقدمہ درج کیا۔ چیف جسٹس پاکستان نے آئی جی سید کلیم امام کو خود تحقیقات کا حکم دیتے ہوئےکہا کہ وہ ایماندار پولیس افسر ہیں ۔ان کی تفتیش کےبعد حقائق سامنے آجائیں گے۔ چیف جسٹس پاکستان نےہنجرو…	real
343	; "حفیظ سنٹر میں گاہک اور تاجر کے مابین جھگڑے کے باعث گاہک اکرم کا سر پھٹ گیا، گاہک اکرام کی شکایت پر پولیس کیجانب سے غیرمعمولی رسپانس دیا گیا۔ درجنوں پولیس اہلکار اور پولیس افسران حفیظ سنٹر پہنچے، جہاں حفیظ سنٹر کے تاجروں نے شدید مزاحمت کی اور حفیظ سنٹر کے دروازے بند کردیئے۔ دروازے بند کرنے پر پولیس اہکاروں نے دروازے پھلانگ کر تالے توڑ ڈالے، ڈیوٹی پر موجود سکیورٹی گارڈ کی پولیس اہلکاروں سے ہاتھا…	real
344	; "فوٹیج میں ملزمان کی جانب سے گھر میں داخل ہو کر خاتون پر تشدد کرتے دیکھا جا سکتا ہے، متاثرہ خاتون فوزیہ کا کہنا ہے کہ بیٹی اور داماد گزشتہ کچھ عرصہ سے مرحوم خاوند کی جانب سے دیئے گئے مکان پر قبضہ کرنا چاہتے تھے، چند روز قبل بیٹی اور داماد عامر گجر نامی مبینہ قبضہ مافیا کے ساتھ گھر میں داخل ہوئے اور مجھے شدید تشدد کا نشانہ بناتے رہے،جس سے اس کا بازو بھی ٹوٹ گیا۔"; "واقعے کی خبر نشر ہونے کے بعد ہ…	real
345	; یہ بھی ضرور دیکھیں۔۔۔; "آئی جی پنجاب کا کہنا تھا کہ قانون کو ہاتھ میں لینے والے تمام افراد کے خلاف بلا امتیاز کارروائی کی جائے گی، ملزمان کے خلاف دہشتگردی کی دفعات کے تحت مقدمہ درج کرلیا گیا۔ واضح رہے کہ جیت کے جشن میں قانون کوتماشہ بنانے والے تحریک انصاف کے ایم پی اے نے گرفتاری دیدی۔ ملک ندیم عباس بارا نے ایس پی گرین ٹاؤن کے آفس پہنچ کر گرفتاری دی۔ گرفتارایم پی اے پر پولیس اہلکاروں پر تشدداور…	real
346	; "خبر پڑھیں۔۔آئی جی پنجاب کو معذور کی فریاد نہ سننا مہنگا پڑ گیا، توہین عدالت کی زد میں آگئے"; یہ خبر پڑھیں۔۔۔کرپشن کیس میں گرفتار احد چیمہ اور شاہد شفیق کی مشکلات مزید بڑھ گئیں; سٹی فوٹی ٹو کو موصول ہونے والی فوٹیج میں دیکھا جاسکتا ہے کہ کس طرح ٹھیکیدار کے کارندے ڈرائیور کو تشدد کا نشانہ بنا رہے ہیں جبکہ قریب ہی کھڑا پولیس اہلکار تماشا دیکھ رہا ہے۔; "سٹی 42 کے مطابق رنگ روڈ پر نئے ٹھیکے کے بع…	real
347	; "عینی شاہدین کا کہنا ہے کہ پولیس اہلکاروں نے کار سواروں سے رشوت طلب کی، رشوت نہ دینے پر پولیس اہلکار کار سواروں کو مارپیٹتے تھانے لے گئے۔"; ایس پی کینٹ عبداللہ ملک کا کہنا ہے کہ واقعہ میں ملوث اہلکاروں کے خلاف کڑی محکمانہ کاروائی کی جائے گی۔; پولیس اہلکاروں نے واقعہ کی فوٹیج بنانے والے دو افراد کو بھی حراست میں لے لیا جبکہ واقعہ کی خبر نشر ہونے پر ایس پی کینٹ نے نوٹس لیکر ڈی ایس پی ڈیفنس کو واق…	real
348	; "محلہ داروں کا کہنا تھا کہ ندیم نے دوسری شادی عائشہ نامی عورت سے کر رکھی ہے، عائشہ اپنی سوتیلی بیٹی نو سالہ مناہل کو روز مارتی تھی جس کے رونے کی آوازیں پورے محلے میں گونجتی تھیں، محلہ داروں نے مناہل کے والد سے بھی اس کا ذکر کیا مگرعائشہ پھر بھی مناہل پر تشدد کرنے سے باز نہ آئی تو محلہ داروں نے مناہل کے والد ندیم اور سوتیلی ماں کے خلاف تھانے میں درخواست جمع کروادی، جس پر پولیس نے دونوں میاں بیوی…	real
349	; ; پولیس بھی اپنے پیٹی بھائیوں کو بچانے کے لیے سرگرم ہے۔ فائرنگ سے جاں بحق چودہ سالہ سلیم کی ایف آئی آر میں بھی ڈولفن اہلکاروں کو نامزد نہیں کیا گیا۔عینی شاہدین کی جانب سے یہی موقف سامنے آیا تھا کہ کار سوار نہتے تھے۔; یہ خبر پڑھیں۔۔تحریک انصاف کی ٹکٹ کا حقدار کون؟ فیصلہ کل ہوگا; ; "خبر ضرور پڑھیں۔۔۔شادباغ میں ڈولفن فورس کی فائرنگ سے راہگیر نوجوان جاں بحق " ورثا سراپا احتجاج""; ""تفصیلات کے مطابق…	real
350	; تفصیلات کے مطابق شاہد شفیق کے قانونی ماہرین نےاحتساب عدالت کے احکامات کی روشنی میں ملزم کا میڈیکل کرانے کی استدعا کی۔ نیب حکام نے 5 مارچ کو شاہد شفیق کا میڈیکل چیک اپ کرانے کا کہا۔ انکاکہنا تھا کہ چیک اپ احتساب عدالت کے احکامات کی روشنی میں کرائیں گے۔ ملزم شاہد شفیق کی قانونی ٹیم نے احتساب عدالت سے رجوع کرنے کا فیصلہ کیا۔	real
351	; "تفصیلات کے مطابق رائیونڈ کی رہائشی سونیا جو کہ تین بچوں کی ماں تھی۔اس کے سسرالیوں نے اسے پٹرول چھڑک کر آگ لگا دی،سونیا کو تشویش ناک حالت میں میو ہسپتال پہنچایا گیا تھا۔ جہاں سونیا کچھ دن ہسپتال میں زیر علاج رہنے کے بعد دم توڑ گئی۔ پولیس نے مقدمہ تو درج کر لیا لیکن تاحال ملزمان کو گرفتار نہیں کیا جا سکا۔لواحقین کا کہنا ہے کہ سونیا کے سسرال والے ہماری بیٹی پر پہلے بھی تشدد کیا کر تے تھے ،کبھی پی…	real
352	; پولیس ذرائع کے مطابق اعلیٰ افسران کی جانب سے ون ویلروں کو سبق سکھانے کا حکم ملا جس کے بعد ون ویلر پر تشدد کیا گیا جبکہ اس دوران نوجوان چیختا چلاتا رہا اور معافی مانگتا رہا مگر پولیس اہلکاروں نے اس کی ایک نہ سنی۔; "آئی جی پنجاب کیپٹن (ر) عارف نواز خان نے نوجوان پر پولیس تشدد کے واقعہ کا نوٹس لیتے ہوئے سی سی پی او لاہور سے واقعہ کی رپورٹ طلب کرلی ہے، آئی جی پنجاب کا کہنا ہے کہ پولیس میں کسی کا ب…	real
353	; بعدازاں بچی کو چائلڈ پروٹیکشن بیورو نے تحویل میں لے لیا جن کی مدعیت میں ایف آئی آر درج کرادی گئی ہے۔بچی کا میڈیکل بھی کرایا گیاہے۔بچی کے مطابق اس کے والد کا انتقال ہو گیا ہے اور وہ فیض پور شرقپور روڈ کی رہنے والی ہے۔ متاثرہ بچی نے وزیراعظم اور چیف جسٹس پاکستان سے انصاف کی اپیل کی ہے۔; "تفصیلات کے مطابق چائنہ سکیم میں شہری اعجاز کی بیوی حنا نے سفاکی اور وحشیانہ پن کی حد کردی، 11 سالہ ملازمہ کو ت…	real
354	; "پولیس کا کہنا ہے کہ فرانزک معائنے کے لئے نمونے لیبارٹری بھجوائے گئے ہیں، عائشہ کے شوہر سے بھی تفصیلی پوچھ گچھ جاری ہے۔ پولیس کا مزید کہنا ہے کہ جائے وقوعہ سے ایک انگیٹھی بھی ملی تھی، واقعہ خود کشی ہے یا حادثہ مزید حقائق تفتیش مکمل ہونے پر سامنے آئیں گے۔"; ; ابتدائی پوسٹ مارٹم رپورٹ کے مطابق ماں اور بچوں کی موت کاربن مونوآکسائیڈ گیس کے باعث ہوئی۔ تینوں افراد کے جسم پر تشدد کا کوئی نشان یا مزاحم…	real
355	; انعم کے مطابق اسکا شوہر اس سے پہلے بھی متعدد بار تشدد کا نشانہ بنا چکا ہے اور ہمایوں کی انعم سے چوتھی شادی ہے۔; "پولیس کے مطابق ملت پارک کے علاقے کے رہائشی ہمایوں کا اپنی بیوی سے گھریلو ناچاقی پر جھگڑا ہوا، اس دوران ہمایوں نے طیش میں آ کر بیوی انعم پر فائرنگ کر دی۔ پولیس کے مطابق ہمایوں نے انعم کی ٹانگوں پر تین گولیاں ماریں جبکہ واقعہ کی اطلاع ملنے پر پولیس موقع پر پہنچی اور ہمایوں کو موقع سے …	real
356	; ; "سٹی 42 کو موصول ہونے والی موبائل ویڈیو میں تمام مناظر دیکھے جا سکتے ہیں،کان پکڑوانے اور تشدد کا نشانہ بنانے کے بعد وارڈن نے شہری کو بھاٹی پولیس کے حوالے کر دیا۔"; تفصیلات کے مطابق داتا دربار کے قریب بغیر ہیلمٹ موٹربائیک چلانے والے ٹریفک وارڈن عالمگیر کی شہری نے ویڈیو بنانے کی کوشش کی تو ٹریفک وارڈن نے شہری کو دھر لیا اور تشدد کا نشانہ بناتے ہوئے اسے ٹریفک سیکٹر میں لے گیا ۔ٹریفک وارڈن عالمگی…	real
357	; "خبر ضرور پڑھیں۔۔۔۔پاکستان کی معروف اداکارہ نے دوسری شادی کرلی، شوبز چھوڑنے کا اعلان"; "پٹرول پمپس عملے کا کہنا ہے کہ اطلاع کے باوجود پولیس ایک گھنٹہ تاخیر سے پہنچی ،عملے نے یہ الزام بھی لگایاکہ مسلح افراد نے کیشیر سے ایک لاکھ روپے بھی چھینے،دوسری جانب پولیس کا کہنا ہے کہ واقعہ مشکوک ہے، اس حوالے سے تفتیش جاری ہے۔"; "یہ خبر پڑھیں۔۔خواجہ سعد رفیق نے بڑا فیصلہ کرلیا، عمران خان کی نیندیں اُڑ گئیں"…	real
358	; "ڈولفن اہلکار ایک نوجوان کو گھسیٹ کر اپنے ساتھ لے جا رہے تھے کہ وہاں کھڑے ایک نوجوان نے انکی ویڈیو بنالی، جس پر ڈولفن اہلکاروں نے نوجوان کو تشدد کا نشانہ بنانا شروع کر دیا، اس دوران ڈولفن فورس نے دوسری بیٹ کو بھی طلب کرلیا اور 8 اہلکاروں نے ملکر نوجوان پر تشدد کیا۔"; "سی سی ٹی وی فوٹیج میں واقعے کے تمام مناظر دیکھے جاسکتے ہیں، ایس پی ڈولفن بلال ظفر نے انکوائری کا حکم دے دیا، ڈی ایس پی ڈولفن 24 …	real
359	; دوسری جانب وزیر اعلی پنجاب سردار عثمان بزدار نے سبزہ زارمیں ڈولفن فورس کی مبینہ فائزنگ سے شہری کی ہلاکت کا نوٹس لیتے ہوئے آئی جی پنجاب سے رپورٹ طلب کرلی ہے۔ا نہوں نے واقعے کی ہر پہلو سے تحقیقات کرکے ذمہ داروں کے خلاف قانونی کارروائی کرنے کی ہدایت کی ۔ وزیراعلیٰ نے کہا ہے کہ حکومت جاں بحق شہری کے لواحقین کو انصاف فراہم کرے گی۔; عینی شاہدین کا کہنا ہے کہ ڈولفن اہلکار نے عمیر کو ٹانگوں اور سینے می…	real
360	; یہ خبر پڑھیں۔۔خیابان جناح رائیونڈ روڈ کے قریب خوفناک ٹریفک حادثہ; سٹی 42 کے مطابق تیس سالہ نازیہ کو شدید زخمی حالت میں اوکاڑہ سے لاہور جنرل ہسپتال لایا گیا۔ نازیہ کے والد کے مطابق عید کے دن کھانا اچھا نہ بنانے پر اس کے شوہر اور سسرالیوں نے کلہاڑیوں اور چھریوں کے وار سے اسے تشدد کا نشانہ بنایا۔ جس سے نازیہ کے سر اور جسم پر گہری چوٹیں آئیں۔; "خبر ضرور پڑھیں۔۔۔جنرل ہسپتال انتظامیہ کی نااہلی کی انت…	real
361	; تفصیلات کے مطابق ریٹی گن روڈ پر واقع گورنمنٹ سنٹرل ماڈل سکول نمبر 2 میں ٹیچرکا چوتھی جماعت کے طالبعلم علی حیدر تشدد کا واقع سامنے آگیا۔ سکول ہیڈ صوفیہ کوثر کا کہنا تھا کہ کسی ٹیچر نے علی حیدر کو نہیں ماراجبکہ علی حیدر کا کہنا تھا کہ ٹیچرسمیرا نے چھٹی کے وقت لائن توڑنے پر زور سے تھپڑ مارا جس کی وجہ سے اس کا سر دیوار سے لگا اور پھٹ گیا۔ بچے کے والد محمد ہاشم نے بتایا کہ ٹیچر نے سر پھاڑنے کے بعد ا…	real
362	; "اس سے پہلے ملزمہ کا ایک بیٹا منشیات فروشی کے جرم میں سزا کاٹ رہا ہے، ملزمان کو ڈوبن پورہ سے گرفتار کیا گیا، اس حوالے سے ایس ایچ او سبزازار محمد انور کا کہنا تھا کہ ملزمان کو گرفتار کر کے مزید تفتیش کر رہے ہیں۔تھانہ سبزازار پولیس نے منشیات فروش ثاقب عرف مجنوں سے تقریباً 2 کلو چرس اور ملزمہ پروین سے 1 کلو چرس برآمد کرلی، جبکہ اس سے قبل ملزمہ پروین کے خلاف غازی آباد پولیس اسٹیشن میں بھی منشیات کا…	real
363	; "سٹی فورٹی ٹوکو موصول ہونے والی فوٹیج میں دیکھا جا سکتا ہے کہ پولیس اہلکاروں نے منشیات فروش کی بیوی کو چھیڑاجس پرمنشیات فروش آپے سے باہر ہو گئے، انہوں نے پولیس اہلکاروں پراسلحہ تان لیا، پہلے اہلکارموقع سے فرار ہوئے اورپھردوبارہ آکرمنشیات فروشوں کوقابوکرلیا۔ دونوں منشیات فروش پولیس اہلکاروں کےمخبربھی رہ چکے ہیں، پولیس ذرائع کے مطابق منشیات فروشوں کے قبضے سے اسلحہ، چاقو اورٹوکہ برآمد کرلیا ہے۔…	real
364	; "ایڈیشنل سیشن جج رفاقت علی قمر نے دونوں ملزمان کو اصلاح کا موقع دے دیا، عدالتی فیصلے کے مطابق ملزمان اپنے گھر سے ایک سال تک ہر ماہ ایک بار پروبیشن افسر کے پاس پیش ہونگے، ایک سال کے اصلاحی پروگرام کے بعد بری تصور ہونگے۔"; "تفصیلات کے مطابق سیشن عدالت نے اقبال جرم کرنے پر دو منشیات فروشوں کو اصلاح کیلئے پروبیشن پر بجھوا دیا، ملزم پرویز اور محمد بلال کو ایک سال کیلئے پروبیشن افسر کے حوالے کیا گیا …	real
365	; دوران تفتیش 1325 گرام چرس برآمد ہوئی اور ملزم منشیات فروشی کے ناجائز کاروبار میں ملوث رہ چکا ہے لہذا قانون کے مطابق کارروائی کی جائے۔ عدالت نےتمام دلائل سننے کے بعد ملزم کو چودہ روز کے جوڈیشل ریمانڈ پر جیل منتقل کرنے کا حکم دیدیا۔; "تفصیلات کے مطابق جوڈیشل مجسٹریٹ نصر اللہ وٹو کے روبرو پولیس نے ملزم عمر کا ریکارڈ پیش کیا، پراسیکیوشن کے وکیل نے موقف اختیار کیا کہ پولیس نے ملزم کو گرفتار کر کے نا…	real
366	; "ہسپتال گارڈز نے ملزمان کے قبضے سے ہیروئین،چرس، بلیڈ اور نقدی بھی برآمد کرلی۔سٹی 42 ذرائع کے مطابق چوکی پولیس باربار کالز کرنے کے باوجود بھی حرکت میں نہ آئی۔ جرائم سے تنگ ہسپتال انتظامیہ بالآخر خود ہی حرکت میں آگئی۔ ڈی ایم ایس ایڈمن ڈاکٹر سعد بٹ کی سربراہی میں منشیات فروشوں کے گروہ کو گرفتار کر لیا گیا۔"	real
367	; جن طالبات سے نشہ آور اشیاء برآمد ہوئی ہیں ان میں سے دو طالبات فورتھ ایئر میں جبکہ باقی دو سیکنڈ ایئر میں زیر تعلیم تھیں۔; ذرائع نے بتایا ہے کہ انتظامیہ نے کالج کی چار طالبات کو یونیورسٹی سے نکال دیا جن سے منشیات برآمد ہوئی تھیں۔ ان کی ہاسٹل الاٹمنٹ بھی منسوخ کر دی گئی ہے۔; "یہ بھی پڑھیں۔مصطفی ٹاون پولیس کاروائی،پشاور سے لاہور منشیات کی سپلائی کی کوشش ناکام"; ذرائع کا کہنا تھا کہ منشیات کے اس…	real
368	; "تفصیلات کے مطابق نیو ایر نائٹ پر میاں محمد نواز شریف اور میاں محمد شہباز شریف کا قریبی عزیز مصطفٰی احمد جوہر ٹاون اپنے دوستوں کے ساتھ نیو ایر کی پارٹی میں شریک تھا۔ اس دوران پارٹی میں منشیات کا استعمال بھی ہوتا رہا، پولیس ذرائع کے مطابق پارٹی میں جب منشیات ختم ہوئی تو مصطفٰی نے اپنے ڈرائیور اور ایک دوست طحہ کو منشیات لینے کے لیے اپنی گاڑی پر ڈیفنس بھجوایا جہاں گاڑی ڈرائیور سے بے قابو ہو کر ناک…	real
369	; "تفصیلات کے مطابق اینٹی نارکوٹکس پنجاب ڈویژن نے لاہور ائیر پورٹ پر بڑی کارروائی کرتے ہوئے کینیڈا سےآنے والے دو مسافر سے2 کروڑ کی کوکین اور میری جوآنا برآمد کرلی، مسافر خضر محمد شیرازی پی کے798 کے ذریعے ٹورنٹو سے لاہورآیا،لاہور ایئر پورٹ پر سامان کی چیکنگ کی گئی تو اس میں سے1کلوکوکین اور3گرام میری جوآنا برآمد ہوئی، اے این ایف ذرائع کا کہناتھاکہ برآمد ہونے والی منشیات کی کل قیمت2 کروڑ روپے ہے، …	real
370	; "یہ خبر ضرور پڑھیں : ساندہ پولیس کی بڑی کارروائی،2 منشیات فروش گرفتار،15کلو چرس برآمد"; "ذرائع کے مطابق ایف آئی اے کی نیشنل ایکشن پلان کےتحت کارروائی کی،شاہ عالم مارکیٹ میں حوالہ ہنڈی کاکاروبارکرنیوالاملزم گرفتارکر لیا، ملزم رستم خان سے لاکھوں روپے مالیت کی ملکی وغیر ملکی کرنسی برآمد ہوئی، کارروائی ڈپٹی ڈائریکٹر جمیل احمد میو کی سربراہی میں کی گئی۔"	real
371	; "پولیس کے مطابق غازی آباد کے علاقے تاجپورہ میں بچوں کے جھگڑے میں بڑے بھی کود پڑے، لڑائی کے دوران رانا گروپ کی جانب سے اندھا دھند فائرنگ کی گئی جس کے نتیجے میں 5 راہگیر زخمی ہوگئے جن میں معصوم بچے بھی شامل ہیں۔پولیس حکام کا کہنا ہے کہ ایک ملزم کو گرفتار کر کے مقدمہ درج کر لیا گیا ہے، جبکہ لواحقین کا الزام ہے پولیس ملزمان کے ساتھ ملی ہوئی ہے۔ دوسری جانب پولیس کے مطابق ملزمان کے گھروں سے بھاری مق…	real
372	; "تھانہ نصیر آباد پولیس نے کارروائی کرتے ہوئے منشیات فروش کو گرفتار کر لیا، پولیس کے مطابق ملزم جوہر ٹاؤن ، ماڈل ٹاؤن، رائیونڈ سمیت مختلف علاقوں میں سرگرم تھا جبکہ مختلف تعلیمی اداروں کے گرد منشیات کی فروخت میں بھی ملوث تھا۔ پولیس نے خفیہ اطلاع پر کارروائی کرتے ہوئے ملزم عمران احمد سے 1 کلو 535 گرام چرس برآمد کر لی۔"; ایس ایچ او نصیر آباد انسپکٹر مسعود الرحمن کے مطابق ملزم ریکارڈ یافتہ اور پہلے …	real
373	قومی ادارہ صحت نے برطانیہ سے آئے 2 مسافروں میں کورونا کی نئی قسم کی تصدیق کردی	real
374	ترکی میں 10 سیکنڈ میں کووڈ کی تشخیص کرنے والا ٹیسٹ تیار	real
375	بھارت میں کورونا وائرس کی پہلی ویکسین کے استعمال کی منظوری	real
376	کراچی: وائرس کی نئی قسم کا شکار تین مریضوں کی حالت میں بہتری	real
377	صرف بالوں کا کٹوانا ایک جوڑے کی کووڈ 19 سے موت کا باعث بن گیا	real
378	پنجاب: زیر استعمال وینٹیلیٹرز کی شرح سنگین، ایک روز میں 181 تشویشناک مریض ہسپتال منتقل	real
379	ایران کی تیار کردہ کورونا ویکسین کی انسانی آزمائش کا آغاز	real
380	کورونا وبا: ملک میں ایک ہزار 776 نئے کیسز، مزید ایک ہزار 602 مریض صحتیاب	real
381	کووڈ 19 سے متاثر افراد میں مدافعتی ردعمل کئی ماہ تک رہتا ہے، تحقیق	real
382	کورونا وائرس کے باعث سالِ نو پر سڈنی میں عوامی اجتماعات پر پابندی	real
383	برطانوی ویکسین کورونا کی نئی قسم کے خلاف موثر ہونے کا امکان	real
384	پاکستان میں کووڈ-19 کے مریضوں پر تحقیق کا آغاز	real
385	کورونا ایک بلا اور آفت ہے، عوام ایس او پیز پر عمل کریں، مولانا طارق جمیل	real
386	چینی کمپنی کی ویکسین ریگولیٹری منظوری کے عمل میں داخل	real
387	کورونا وائرس کی نئی قسم زیادہ متعدی ہے، تحقیق	real
388	سماجی دوری کے بغیر صرف فیس ماسک سے کووڈ کو روکنا ممکن نہیں، تحقیق	real
389	کووڈ 19 کی نئی قسم پوری دنیا میں پھیل سکتی ہے، ماہرین صحت نے خدشہ ظاہر کردیا	real
390	امریکا میں فضائی سفر کے دوران مسافر کا کووڈ کے باعث انتقال	real
391	بھارتی اداکارہ راکول پریت سنگھ بھی کورونا کا شکار	real
392	عالمی وبا سے مالی بحران کے باعث فیشن برانڈ 'دامن' کو بند کرنے کا اعلان	real
393	کورونا کی نئی قسم بچوں کو آسانی سے ہدف بناسکتی ہے، سائنسدانوں کا خدشہ	real
394	کووڈ 19 سے دماغ کو پہنچنے والے نقصانات کا انکشاف	real
395	3 آسان طریقوں سے آپ سردیوں میں کووڈ کو پھیلنے سے روک سکتے ہیں	real
396	کچھ لوگوں میں کووڈ 19 کی شدت دیگر کے مقابلے میں سنگین کیوں ہوتی ہے؟	real
397	ماہرہ خان بھی کورونا وائرس سے متاثر	real
398	پاکستان نے کووڈ 19 ویکسین کی خریداری کیلئے مختص رقم 25 کروڑ ڈالر تک بڑھا دی	real
399	قرنطینہ کے دوران دورہ نیوزی لینڈ منسوخ کرنے پر سوچا گیا، مصباح	real
400	کووڈ سے مردوں میں سنگین شدت کا امکان خواتین سے 3 گنا زیادہ ہوتا ہے، تحقیق	real
401	چینی ویکسین کورونا سے بچاؤ میں 86 فیصد تک موثر قرار	real
402	حفاظتی تدابیر پر اس طرح عمل نہیں ہو رہا جیسے پہلی لہر میں کیا گیا تھا، اسد عمر	real
403	آکسفورڈ یونیورسٹی کی کووڈ ویکسین محفوظ اور موثر قرار	real
404	کراچی مسلسل دوسرے روز بھی کورونا کیسز کی مثبت شرح میں سب سے آگے	real
405	حکومت کورونا ویکسینز کیلئے چین، روس سے بات کر رہی ہے، ڈاکٹر فیصل سلطان	real
406	پاکستان میں 5 ماہ بعد ایک روز میں سب سے زیادہ 3 ہزار 795 کورونا کیسز	real
407	روس کی پاکستان کو کووڈ-19 ویکسین کی فراہمی کی پیش کش	real
408	میرپور میں کورونا کیسز کی مثبت شرح 22 فیصد، کراچی میں 17.39 فیصد ریکارڈ	real
409	لوگ کووڈ 19 سے دوبارہ متاثر ہوسکتے ہیں، عالمی ادارہ صحت	real
410	ملک میں 24 گھنٹوں کے دوران مجموعی کیسز کی مثبت شرح 7.2 فیصد رہی، کراچی میں یہ تناسب 18.76 فیصد ریکارڈ ہوا، این سی او سی	real
411	برطانیہ کے وزیر صحت میٹ ہینکوک نے اس بات کا اعلان کرتے ہوئے بتایا کہ عالمی ادارہ صحت کو اس نئی قسم سے آگاہ کیا گیا ہے۔	real
412	کورونا وائرس کی دوسری لہر میں شہر کے تمام اضلاع میں لاک ڈاؤن کی مدت میں توسیع نہیں کی گئی، حکام	real
413	درجہ حرارت میں کمی اور کووڈ 19 کے کیسز میں اضافے کے ساتھ اندازہ ہورہا ہے کہ یہ وبا موسم سرما کے دوران مزید بدتر ہوسکتی ہے۔	real
414	ماہرین کی جانب سے مسلسل یہ جاننے کی کوشش کی جارہی ہے کہ کچھ افراد میں کووڈ 19 کی شدت دیگر کے مقابلے میں زیادہ سنگین کیوں ہوتی ہے۔	real
415	اداکارہ ماہرہ خان نے اپنی سوشل میڈیا پوسٹ کے ذریعے مداحوں کو کورونا سے متاثر ہونے سے متعلق آگاہ کیا۔	real
416	روس نے بھی حال ہی میں اپنی ویکسین کی پیشکش کی تھی، 2021 کے اختتام تک یہ ویکسین عوام کے لیے دستیاب ہوگی، پارلیمانی سیکریٹری	real
417	اس قسم کو گزشتہ دنوں دریافت کیا گیا اور اب انکشاف ہوا کہ وہ دیگر اقسام کے مقابلے میں 70 فیصد زیادہ تیزی سے پھیل رہی ہے۔	real
418	ملک میں کورونا وائرس کے مجموعی کیسز کی تعداد 4 لاکھ 57 ہزار 288 ہوگئی جس میں سے 4 لاکھ 7 ہزار 405 صحتیاب ہوئے ہیں۔	real
419	شہری کرسمس کیلئے شاپنگ کے دوران احتیاطی تدابیر پر عمل کریں اور بازار میں رش والی جگہوں پر جانے سے گریز کریں، این سی او سی	real
420	مجھے ابھی کورونا ٹیسٹ کا نتیجہ ملا جو مثبت آیا ہے، خود کو گھر میں آئیسولیٹ رکھوں گا، وفاقی وزیر منصوبہ بندی	real
421	موسم گرما میں کووڈ 19 کی شرح میں کوئی خاص کمی تو نہیں آئی، مگر سرد موسم اس کے پھیلاؤ کی رفتار بڑھا سکتا ہے۔	real
422	15 نومبر 2020 تک متعدد ممالک نے 13 مختلف کمپنیوں کی ویکسینز کے 7 ارب 48 کروڑ ڈوز اپنے لیے مختص کرالیے تھے۔	real
423	لاہور کے سرکاری ہسپتالوں میں کووِڈ مریضوں کے لیے مختص کردہ 267 وینٹیلیٹرز میں سے 56 فیصد زیر استعمال ہیں، رپورٹ	real
424	ویکسین کے پہلے مرحلے کے ٹرائل کے لیے 56 افراد کی خدمات حاصل کی گئی ہیں جن کو 2 ہفتے کے دوران 2 ڈوز کا ستعمال کرایا جائے گا۔	real
425	ملک میں اس وائرس سے متاثرہ افراد کی مجموعی تعداد 4 لاکھ 75 ہزار 85 ہوگئی جس میں سے 4 لاکھ 25 ہزار 494 صحتیاب ہوئے ہیں۔	real
426	کووڈ 19 سے معمولی حد تک بیمار ہونے والے یا بغیر علامات والے مریضوں میں اس بیماری کے خلاف مدافعت کئی ماہ تک برقرار رہتی ہے۔	real
427	کورونا وائرس کے کیسز کے باعث 9 جنوری تک لگ بھگ ڈھائی لاکھ افراد سخت لاک ڈاؤن میں رہیں گے، رپورٹ	real
428	ویکسین تیار کرنے والی کمپنیی کے سربراہ کے مطابق محققین کا ماننا ہے کہ یہ ویکسین کورونا وائرس کی نئی قسم کے خلاف موثر ثابت ہوگی	real
429	کیوی ٹیم نے دوسرے دن کے کھیل میں اپنی اننگ میں 209 رنز کا اضافہ کیا، پاکستان کی جانب سے شاہین آفریدی نے 4 وکٹیں لیں۔	real
430	پمز کے پیرا میڈیکل اسٹاف اور امریکی سائنس دانوں پر مشتمل ٹیم نے پاکستان میں کووڈ-19 کے مریضوں پر تحقیق کا آغاز کیا۔	real
431	کوئی شخص گھر سے ماسک کے بغیر نہ نکلے، ایک دوسرے سے 6 فٹ کا فاصلہ رکھیں، معروف مذہبی اسکالر	real
432	سینوفارم کی تیار کردہ 2 کووڈ 19 ویکسینز میں سے ایک کو مارکیٹ میں فراہم کرنے کے لیے باضابطہ درخواست جمع کرادی گئی ہے۔	real
433	یہ نئی قسم اتنی زیادہ متعدی ہے کہ اس کی روک تھام کے لیے نئے احتیاطی اقدامات کرنا ضروری ہیں، تحقیق	real
434	تحقیق میں 5 مختلف اقسام کے فیس ماسک میٹریلز کو جانچا گیا کہ کھانسی یا چھینک کے دوران وہ وائرل ذرات کو کس حد تک روکتے ہیں۔	real
435	پاکستان میں اب تک نئی قسم کا کوئی کیس رپورٹ نہیں ہوا، قومی ادارہ صحت نمونوں سے اس کی تشخیص کی صلاحیت رکھتا ہے، ترجمان	real
436	ایک مسافر نے اس مریض کی زندگی بچانے کی کوشش کی تھی اور اب اس میں بھی کووڈ جیسی علامات سامنے آئی ہیں۔	real
437	میرا کورونا وائرس کا ٹیسٹ مثبت آیا ہے اور میں نے خود کو قرنطینہ کرلیا ہے، اداکارہ	real
438	برانڈ 31 دسمبر 2020 کو بند ہوجائے گا، کلیئرنس سیل آج سے شروع ہورہی ہے اور آخری دن تک جاری رہے گی، کریٹیو ڈائریکٹر دامن	real
439	ڈیٹا سے پتا چلتا ہے کہ کورونا وائرس کی نئی قسم بچوں میں دیگر اقسام کے مقابلے میں زیادہ تیزی سے پھیل سکتی ہے۔	real
440	پروفیشنلز کی حیثیت سے ہمیں بہانے نہیں تراشنے ہوتے کیونکہ آخر میں لوگ نتیجہ دیکھتے ہیں، ہیڈ کوچ	real
441	یہ بات ایک نئی طبی تحقیق میں سامنے آئی جس میں جنوری سے جون کے دوران 30 لاکھ سے زیادہ کووڈ کیسز کا تجزیہ کیا گیا۔	real
442	یہ بات متحدہ عرب امارات کے محکمہ صحت نے ویکسین کے آخری مرحلے کے کلینیکل ٹرائلز کے ابتدائی نتائج میں بتائی۔	real
443	اگر عوام نے احتیاط سے کام نہ لیا تو شاید ہفتے یا دو ہفتے بعد مزید شعبے بند کرنے پڑیں، وزیر برائے منصوبہ بندی اور ترقی	real
444	شہر قائد میں 24 گھنٹوں میں کیسز کی مثبت شرح 21.80 فیصد رہی، دوسرے نمبر پر آزاد کشمیر کا علاقہ میرپور رہا، این سی او سی	real
445	ابھی کچھ حتمی نہیں ہے تاہم ہمیں ایک ذریعے سے زیادہ پر انحصار کرنا ہوگا، معاون خصوصی صحت	real
446	ملک میں اس وائرس سے متاثرہ افراد کی مجموعی تعداد 4 لاکھ 20 ہزار 294 ہوگئی، جس میں سے 3 لاکھ 56 ہزار 542 صحتیاب ہوگئے۔	real
447	پاکستان ویکسین کے بروقت حصول کے لیے مختلف ذرائع سے بدستور رابطے میں ہے، ترجمان دفتر خارجہ	real
448	ملک میں گزشتہ 24 گھنٹوں کے دوران مجموعی طور پر مثبت شرح 7.94 فیصد رہی، اس وقت 327 مریض وینٹی لیٹر پر موجود ہیں، این سی او سی	real
449	دنیا بھر کے محققین یہ تعین کرنے کی کوشش کررہے ہیں کہ کس طرح اور کب کوئی فرد دوبارہ کووڈ 19 کا شکار ہوسکتا ہے۔	real
450	کورونا وائرس کے ایک غیر معمولی اثر کی ممکنہ وضاحت سامنے آگئی	real
451	بھارت کی آسٹریلیا کو بائیکاٹ کی دھمکی، ٹیسٹ سیریز غیر یقینی صورت حال کا شکار	real
452	ملک بھر میں تعلیمی ادارے 25 جنوری سے مرحلہ وار کھولنے کا امکان	real
453	کورونا کی دوسری لہر کے باعث ایئرلفٹ کا 31 مارچ تک سروس معطل رکھنے کا اعلان	real
454	حکومت سندھ کا کراچی کے ایکسپو سینٹر کو 'کورونا ویکسین سینٹر' بنانے کا فیصلہ	real
455	طورخم سرحد پر کورونا ریپڈ ٹیسٹنگ مزدوروں کیلئے پریشانی کا سبب	real
456	چین کی کورونا ویکسین بیماری سے بچانے کے لیے 80 فیصد تک موثر ثابت	real
457	پاکستان میں کورونا وائرس سے اموات کی تعداد 10 ہزار سے تجاوز کرگئی	real
458	کورونا کی نئی قسم زیادہ آسانی سے پھیلنے والی ہے، تحقیق	real
459	پاکستان میں کورونا وائرس کی نئی قسم کے کیسز سامنے آگئے	real
460	اسد عمر کورونا وائرس سے صحتیاب ہوگئے	real
461	کورونا کی نئی قسم: سعودی عرب نے داخلے پر پابندی میں ایک ہفتے کی توسیع کردی	real
462	سعودی عرب کیلئے سفری پابندیوں میں نرمی، پی آئی اے کا پروازیں شروع کرنےکا فیصلہ	real
463	کورونا وائرس: پاکستان میں مزید 58 اموات، فعال کیسز 39 ہزار 329 رہ گئے	real
464	ملک میں کورونا وائرس کے تقریباً 90 فیصد مریض صحتیاب	real
465	چلی کے ایئرپورٹ میں کووڈ 19 سے متاثر مسافروں کی شناخت کا کام کتوں کے ذمے	real
466	کورونا وائرس کے خلاف اجتماعی مدافعت کا حصول 2021 کے آخر تک ناممکن قرار	real
467	کورونا وائرس کی دوسری لہر: ملک میں ایک روز میں ریکارڈ 111 اموات	real
468	برطانیہ میں دریافت ہونے والی کورونا کی نئی قسم ایشیا پہنچ گئی	real
469	’حکومت کووڈ 19 ویکسین کے بڑے مینوفکچررز سے قریبی رابطے میں ہے‘	real
470	ایس او پیز کی خلاف ورزی: نائٹ کلب سے سریش رائنا، سوزین خان اور گرو رندھاوا گرفتار	real
471	برطانیہ کے بعد جنوبی افریقہ میں بھی کورونا کی بالکل نئی قسم دریافت	real
472	پاکستان میں کورونا وائرس سے ایک روز میں مزید 82 اموات	real
473	کووڈ 19 کو شکست دینے والوں کو دل کا معائنہ کیوں کرانا چاہیے؟	real
474	وزیر اعلیٰ پنجاب کا کورونا ٹیسٹ مثبت آگیا	real
475	کورونا وائرس: ملک میں 41 روز بعد یومیہ کیسز کی سب سے کم تعداد	real
476	خیبرپختونخوا: کورونا کے باعث مدارس میں تعلیمی سرگرمیاں بند کرنے کا حکم	real
477	مولانا طارق جمیل ایک ہفتے میں کورونا سے صحتیاب ہوگئے	real
478	پشاور: کورونا وائرس سے متاثرہ 3 کمسن بچے ہسپتال میں داخل	real
479	حیدرآباد میں کورونا ٹیسٹ مثبت آنے کی شرح سب سے زیادہ 24.6 فیصد ہے، این سی او سی	real
480	کورونا کی دوسری لہر: سندھ بھر کے مدارس میں تعلیمی سرگرمیاں بند کرنے کا فیصلہ	real
481	لگ بھگ سو فیصد کورونا وائرس مارنے والا اسپرے تیار	real
482	کورونا وائرس: پاکستان میں دوسری لہر کے دوران ایک روز میں ریکارڈ 105 اموات	real
483	جاپان کی پاکستان کو کووڈ-19 کی روک تھام کے لیے 95 لاکھ ڈالر کی گرانٹ	real
484	نجی شعبے کو کورونا ویکسین کی درآمد کی اجازت دینے کا کوئی منصوبہ نہیں ہے، وزارت صحت	real
485	ملک میں کورونا کے مزید ایک ہزار 719 مریض صحتیاب، فعال کیسز 47 ہزار سے زائد	real
486	مولانا طارق جمیل میں کووڈ 19 کی تشخیص	real
487	اندرون لاہور کے 13 علاقے 'کورونا کیسز میں اضافے' پر سیل کردیے گئے	real
488	وہ شخص جس نے کورونا ویکسین کو محض چند گھنٹوں میں ڈیزائن کیا	real
489	کووڈ 19 کو ہتھیار بنا کر بینک لوٹنے کی ناکام کوشش کرنے والا شخص گرفتار	real
490	کورونا وائرس کی روک تھام کیلئے یو وی لائٹ کا منفرد استعمال سامنے آگیا	real
491	وائرس میں تبدیلی کے ساتھ وبا کی دوسری لہر زیادہ مہلک ہونے کا خدشہ	real
492	کورونا ضوابط کی معمولی خلاف ورزی پر لاکھوں روپے جرمانے کی سزا	real
493	کورونا وائرس کی دوسری لہر: پاکستان میں ایک روز میں 89 اموات	real
494	انگلینڈ، جنوبی افریقہ ایک روزہ سیریز کورونا کیسز کے باعث منسوخ	real
495	پشاور: 'غفلت' کے باعث کورونا مریضوں کی اموات پر ہسپتال ڈائریکٹر سمیت 7 افراد معطل	real
496	وہ نشانیاں جو کووڈ 19 کا شکار ہونے کا اشارہ ہوسکتی ہیں	real
497	کورونا وائرس کی دوسری لہر صحت کے سنگین چیلنجز کا باعث	real
498	کئی ماہ سے دنیا بھر میں طبی ماہرین کے لیے اس وائرس کا ایک اور پہلو معمہ بنا ہوا ہے جسے سائیلنٹ یا ہیپی ہائپوکسیا کا نام دیا گیا۔	real
499	سڈنی میں کیسز رپورٹ ہونے کے بعد کوئنزلینڈ نے اپنی سرحد بند کردی ہے اور حکام نے بتایا کہ قرنطینہ لازمی ہوگا، رپورٹ	real
500	تعلیمی ادارے کھولنے سے متعلق حتمی فیصلہ 4 جنوری کو بین الصوبائی وزرائے تعلیم کانفرنس میں ہوگا۔	real
501	مارچ کے اواخر میں ہماری ٹیم صورتحال کا جائزہ لے گی اور سروس کی بحالی سے متعلق فیصلہ کرے گی، ایئر لفٹ	real
502	کولڈ چین اور دیگر ضروری انتظامات جلد مکمل کیے جائیں گے، جبکہ ویکسین مرحلہ وار کی جائے گی، وزیر صحت سندھ	real
503	سرحدی عہدیدار مقامی یومیہ اجرت کمانے والوں اور مزدوروں کو ہفتے میں 2 بار لازمی ٹیسٹ کا پابند کررہے ہیں، رپورٹ	real
504	جن افراد کو اس ویکسین کے 2 ڈوز استعمال کرائے گئے، ان میں وائرس کے خلاف 99.52 فیصد اینٹی باڈیز کی سطح پیدا ہوئی۔	real
505	ملک میں گزشتہ 24 گھنٹوں میں 2 ہزار 155 نئے مریض سامنے آئے، مزید 55 افراد زندگی کی بازی ہارگئے.	real
506	برطانیہ میں دریافت ہونے والی کورونا وائرس کی نئی قسم زیادہ آسانی سے پھیل سکتی ہے مگر اس بیماری کی شدت میں اضافہ نہیں ہوتا۔	real
507	برطانیہ سے آنے والے 12 افراد کے نمونے لیے گئے، 3 نمونوں میں ابتدائی مرحلے میں کورونا وائرس کی نئی قسم ظاہر ہوئی، محکمہ صحت سندھ	real
508	میرا کورونا ٹیسٹ کا نتیجہ ابھی ملا جو منفی ہے، خیریت دریافت کرنے اور دعائیں کرنے والوں کا تہہ دل سے مشکور ہوں، وفاقی وزیر	real
509	صورتحال کا جائزہ لے رہے ہیں، وائرس کے تیزی سے پھیلنے کے خطرے کے باعث فضا،زمین اور سمندر سے داخلے پر پابندی بڑھائی گئی، وزارت داخلہ	real
510	یکطرفہ اجازت نامے کے باوجود دیار غیر میں پھنسے پاکستانیوں کیلئے پروازیں چلائی جائیں گی، ائیر مارشل ارشد ملک	real
511	گزشتہ 24 گھنٹوں کے دوران ملک میں مزید ایک ہزار 853 مریض اس وائرس کا شکار ہوئے جبکہ ایک ہزار 643 مریض شفایاب ہوئے۔	real
512	گزشتہ 24 گھنٹوں کے دوران مزید ایک ہزار 531 مریض کووِڈ 19 سے شفایاب ہوئے جس کے بعد فعال کیسز کی تعداد 39 ہزار 177 رہ گئی۔	real
513	اس ایئرپورٹ میں کتوں کی ایک ٹیم کسی مسافر میں وائرس کو سونگھ کر بیٹھ جاتی ہے اور اس کے عوض انہیں انعام دیا جاتا ہے۔	real
514	یہ بات عالمی ادارہ صحت (ڈبلیو ایچ او) کی چیف سائنسدان ڈاکٹر سومیا سوامی ناتھن نے ایک انٹرویو کے دوران کہی۔	real
515	ملک بھر میں گزشتہ 24 گھنٹوں میں کورونا وائرس کے 37 ہزار 173 ٹیسٹ کیے گئے جس میں سے 2 ہزار 256 کے نتائج مثبت آئے۔	real
516	ہانگ کانگ میں برطانیہ سے واپس آنے والے 2 طالبعلموں میں کووڈ 19 کی نئی قسم کی تشخیص ہوئی ہے، جس کی تصدیق کیلئے مزید ٹیسٹ ہورہے ہیں۔	real
517	حکومت کے یہ اقدامات ویکسین کی پاکستان کے لیے جلد دستیابی سے متعلق حتمی فیصلے میں مدد دیں گے، این سی او سی کو بریفنگ	real
518	برطانیہ میں کورونا وائرس کی نئی قسم سامنے آنے کے بعد مہاراشٹرا کی حکومت نے تمام علاقوں میں رات کے اوقات میں کرفیو نافذ کیا تھا۔	real
519	یہ نئی قسم برطانیہ میں دریافت ہونے والی قسم سے مختلف ہے اور اصل وائرس کے مقابلے میں زیادہ متعدی ہے۔	real
520	گزشتہ 24 گھنٹوں میں ایک ہزار 704 نئے مریض سامنے آئے، مزید ایک ہزار 852 صحتیاب ہونے سے فعال کیسز 40 ہزار 261 رہ گئے۔	real
521	کووڈ 19 کو شکست دینے والے افراد کی معمول کی زندگی پر لوٹنے سے قبل دل کی صحت کی جانچ پڑتال کرلینی چاہیے۔	real
522	وزیراعلیٰ کو گزشتہ رات سے ہلکی علامات یعنی بخار اور فلو تھا اور وہ ڈاکٹر کے مشورے پر سیلف آئیسولیشن میں ہیں، فوکل پرسن اظہر مشوانی	real
523	گزشتہ 24 گھنٹوں میں ایک ہزار 680 مریض اور 62 اموات کا اضافہ ہوا، ایک ہزار 680 افراد شفایاب بھی ہوگئے۔	real
524	احکامات کی خلاف ورزی کرنے والوں کو متعلقہ قانون کے تحت سزائیں دی جائیں گی، محکمہ داخلہ کے پی	real
525	ان میں 14 دسمبر کو کووڈ-19 کی تشخیص ہوئی تھی جس کے بعد وہ ہسپتال میں زیر علاج تھے۔	real
526	ان بچوں کی عمریں 2 ماہ سے 4 سال کے درمیان ہیں، جس میں سے 2 کی حالت تشویشناک ہے، ڈاکٹرز	real
527	ملک کے تمام شہروں کے مقابلے میں کورونا مثبت آنے کی شرح میں دوسرے نمبر پر کراچی اور تیسرے پر راولپنڈی تھا۔	real
528	سندھ وبائی امراض ایکٹ 2014 کے تحت مدارس میں تمام تعلیمی سرگرمیاں فوری طور پر بند کرنے کا فیصلہ کیا گیا ہے، صوبائی محکمہ داخلہ	real
529	برطانوی فوج نے ایسا اسپرے تیار کیا ہے جو ایک منٹ سے بھی کم وقت میں 99.99 فیصد کورونا وائرس ختم کرنے کی صلاحیت رکھتا ہے۔	real
530	سندھ میں سب سے زیادہ 58، پنجاب میں 30 اور خیبرپختونخوا میں 12 مریض انتقال کرگئے، مجموعی کیسز تقریباً 4 لاکھ 46 ہزار ہوگئے۔	real
531	یہ گرانٹ آلات اور مشینری کی خریداری کے لیے استعمال ہوگی جو طبی اداروں کو مہیا کی جائے گی، جاپانی سفارت خانہ	real
532	ایسا کچھ نہیں ہونے جارہا کیونکہ دنیا بھر میں حکومتیں کورونا ویکسین کے حصول کی کوششیں کر رہی ہیں، سی ای او ڈریپ	real
533	گزشتہ 24 گھنٹوں میں 2 ہزار 362 نئے کیسز اور 36 اموات رپورٹ ہوئیں، ملک میں مجموعی کیسز کی تعداد 4 لاکھ 40 ہزار سے بڑھ گئی۔	real
534	مولانا طارق جمیل نے سوشل میڈیا پر اپنے پیغام میں بتایا کہ گزشتہ چند روز سے طبیعت ناساز تھی اور ٹیسٹ میں کووڈ کی تشخیص ہوئی۔	real
535	دلچسپ بات یہ ہے کہ یہ وہ علاقے ہیں جن کی سڑکیں اور گلیاں مینار پاکستان پر نکلتی ہیں جہاں اپوزیشن آج جلسہ کررہی ہے، رپورٹ	real
536	یہ وہ پہلی کورونا ویکسین ہے جسے اب تک برطانیہ، کینیڈا، سعودی عرب اور امریکا میں استعمال کی اجازت دی جاچکی ہے۔	real
537	ویکسین تک رسائی خاص کر افریقہ سمیت دنیا بھر میں ہر کسی کی ہونی چاہیے، انتونیو گوتریس	real
538	اس شخص نے بینک کو لوٹنے کی کوشش کے دوران ہتھیاروں کا سہارا نہیں لیا بلکہ وہاں موجود افراد کووڈ سے متاثر کرنے کی دھمکی دی۔	real
539	امریکا کے محققین نے ایک انقلابی پیشرفت کا دعویٰ کیا ہے جو کورونا کی روک تھام کے ساتھ مستقبل کے وبائی امراض کی روک تھام کرسکے گا۔	real
540	دوسری لہر کے دوران کیسز کی تعداد ریکارڈ ہونے والے کیسز سے کہیں زیادہ ہے کیوں کہ بہت سے افراد اسے رپورٹ نہیں کررہے، ماہرینِ صحت	real
541	تائیوان میں ایک شخص کو قرنطینہ ضوابط کی محض 8 سیکنڈ خلاف ورزی پر ساڑھے 3 ہزار ڈالرز جرمانے کی سزا سنا دی گئی۔	real
542	سندھ اور پنجاب میں 41، 41 اموات کا اضافہ، 24 گھنٹوں میں 13 ہزار 932 مریض صحتیاب بھی ہوگئے، جس سے فعال کیسز 44 ہزار 218 رہ گئے۔	real
543	انگلینڈ کی ٹیم کے دو کھلاڑیوں کا ٹیسٹ مثبت آنے کے بعد ایک روزہ سیریز کا پہلا میچ منسوخ کردیا گیا تھا۔	real
544	ٹینک میں آکسیجن کی کمی کو نہیں دیکھا گیا، ہسپتال میں کوئی بیک اپ اسٹوریج اور ایمرجنسی ریسکیو اسکوڈ بھی نہیں تھا، ابتدائی رپورٹ	real
545	اس وبائی بیماری کے شکار ہر فرد میں ضروری نہیں علامات ایک جیسی ہوں اور اور علامات کی ترتیب بھی مختلف ہوسکتی ہے۔	real
546	اسٹیک ہولڈرز کی آرا اور اعداد و شمار کے تناظر میں ایس او پیز پر عملدرآمد اور نفاذ اب بھی سنگین تشویش کا معاملہ ہے، رپورٹ	real
547	بھارت میں آکسفورڈ کے بعد مقامی کووڈ ویکسین استعمال کرنے کی منظوری	real
548	کورونا وائرس: ملک میں صحتیاب افراد کی تعداد 4 لاکھ 40 ہزار سے زائد	real
549	سندھ جنوری کے وسط تک کووڈ 19 ویکسین حاصل کرلے گا، صوبائی وزیر صحت	real
550	سال 2020 کے اختتام تک پاکستان میں کورونا کیسز کی تعداد 4 لاکھ 82 ہزار 178 ہوگئی	real
551	چین نے مقامی سطح پر تیار کردہ، 79.3 فیصد مؤثر ویکسین کی منظوری دے دی	real
552	چینی کمپنی سے کورونا ویکسین کی 11لاکھ خوراک کی ایڈوانس بکنگ کا فیصلہ	real
553	امریکا میں کورونا ویکسین استعمال کرنے والے طبی ورکر میں کووڈ کی تشخیص	real
554	سال 2020:کورونا وائرس کے باعث انتقال کرجانے والی شخصیات و سیاستدان	real
555	کورونا کی وبا سنگین مگر مستقبل کے امراض بدترین ہوسکتے ہیں، ڈبلیو ایچ او	real
556	پاکستان: ایک ماہ میں کورونا کے فعال کیسز میں 10 ہزار تک کی کمی	real
557	کورونا کی نئی قسم: برطانیہ سے آنے والی پروازوں پر پابندی میں توسیع	real
558	پاکستان میں کورونا وائرس کے کیسز میں ایک ہزار 974، اموات میں 55 کا اضافہ	real
559	عالمی ادارہ صحت نے خبردار کیا ہے کہ بدترین وبا تو ابھی آنا باقی ہے اور ہمیں عالمی سطح پر اس کے تیاری کے لیے سنجیدہ ہونا چاہیے۔	real
560	نومبر میں فعال کیسز 50 ہزار عبور کرچکے تھے تاہم بعد ازاں اس میں کمی آئی اور پیر تک یہ 39 ہزار 488 تک آگئے، این سی او سی	real
561	پاکستان نے برطانیہ سے آنے والی پروازوں پر پابندی کی مدت میں توسیع کر دی ہے اور یہ مدت اب 4 جنوری 2021 تک بڑھا دی گئی ہے، نوٹیفکیشن	real
562	گزشتہ 24 گھنٹوں میں ایک ہزار 760 مریض شفایاب بھی ہوگئے، گلگت بلتستان میں کوئی نیا کیس اور موت رپورٹ نہیں ہوئی۔	real
563	محققین کا مقصد وبا کے دوران رپورٹ کی جانے والی پیچیدگیوں کی تصدیق کرنا تھا، یعنی کن طبی مسائل کا خطرہ مریضوں کو ہوسکتا ہے۔	real
564	ابتدائی تحقیقات میں آگ لگنے کی وجہ الیکٹرک شارٹ سرکٹ کو قرار دیا گیا، مقامی میڈیا	real
565	اینٹی باڈیز کے امتزاج پر مبنی دوا سے لوگوں کو کووڈ 19 سے 6 سے 12 ماہ تک تحفظ مل سکے گا۔	real
566	صوبے میں پہنچنے والے مسافروں کے ٹیسٹ شروع کردیے ہیں،مثبت آنے والے نمونوں کو مزید ٹیسٹ کیلئے اسلام آباد بھیج دیا ہے، سیکریٹری صحت	real
567	ہمارے پاس ایسے کوئی سائنسی ثبوت نہیں ہیں اور جن افراد میں ہونے کا خدشہ ہے ان کو ڈھونڈ رہے ہیں، معاون خصوصی	real
568	48 نمونوں میں 109 تبدیلیوں کی نشاندہی ہوئی ہے اور ان میں کچھ تبدیلیاں اسپائیک پروٹین سے تعلق رکھتی ہیں، ڈاکٹر عطا الرحمٰن	real
569	بل گیٹس کی مرتب کردہ فہرست میں رواں سال کی مثبت پیشرفت کی بجائے 2021 کے زیادہ بہتر ہونے کی وجوہات بیان کی گئی ہیں۔	real
570	متحدہ عرب امارات کی کونسل نے ایسے وقت میں فتویٰ دیا ہے کہ جب ویکسین کے حرام یا حلال ہونے پر بحث جاری ہے۔	real
571	کورونا وائرس کی نئی قسم دنیا بھر میں تشویش کا باعث بن چکی ہے، جس کے نتیجے میں برطانیہ میں بیماری کے پھیلاؤ کی شرح بڑھ گئی ہے۔	real
572	بائیو این ٹیک اور فائزر نے مشترکہ طور پر کورونا ویکسین تیار کی تھی جسے دنیا میں سب سے پہلے استعمال کرنے کی منظوری دی گئی تھی۔	real
573	چین تیسرے مرحلے کے کلینیکل ٹرائل میں داخل ہو گیا ہے تاکہ ویکسین کی افادیت کی جانچ کی جا سکے۔	real
574	برطانیہ میں نئےکورونا وائرس کے پیش نظر وہاں سے آنے والے مسافروں پر 22 دسمبر کی رات سے 29 دسمبر کی رات تک پابندی ہوگی، این سی او سی	real
575	بھارت کی جانب سے سیرم انسٹیٹوٹ کی تیار کردہ ویکسین کو بیرون ملک بھیجنے پر پابندی عائد کردی گئی ہے۔	real
576	گزشتہ 24 گھنٹوں میں ملک بھر میں 2 ہزار 272 افراد میں وائرس کی تصدیق ہوئی جبکہ مزید 53 افراد لقمہ اجل بنے۔	real
577	پہلے مرحلے میں کووڈ وارڈز میں صحت کی دیکھ بھال کرنے والوں اور دیگر فرنٹ لائن ورکرز کو ویکسین فراہم کی جائے گی، ڈاکٹر عذرا فضل	real
578	ملک میں متاثرہ افراد میں سے 90 فیصد یعنی 4 لاکھ 37 ہزار 229 صحتیاب ہوئے جبکہ 10 ہزار 176 لقمہ اجل بن گئے۔	real
579	دو خوراکوں پر بنی ویکسین چین میں عام استعمال کے لیے سب سے پہلے منظور ہونے والی ویکسین ہے۔	real
580	کابینہ کی خصوصی کمیٹی نے چین کی سرکاری کمپنی سینوفارم سے ویکسین کی پہلے سے بکنگ کرانے کا فیصلہ کیا ہے، رپورٹ	real
581	اس طبی ورکر میں کووڈ 19 کا ٹیسٹ اس وقت مثبت آیا، جب اسے فائزر کی ویکسین استعمال کیے ایک ہفتے سے زیادہ عرصہ ہوچکا تھا۔	real
582	اس عالمی وبا نے پاکستان میں ہر شعبہ ہائے زندگی کے افراد کو متاثر کیا اور کئی نامور شخصیات جہان فانی سے کوچ کرگئیں۔	real
583	برازیل کے صدر جائر بولسونارو نے متعدد مواقع پر یہ اصرار کیا ہے کہ وہ کورونا وائرس کی ویکسین نہیں لگوائیں گے۔	real
584	اس دوران زمینی، سمندری راستوں سے مملکت میں داخلہ ممنوع رہے گا، پابندیوں میں مزید توسیع کی جاسکتی ہے، رپورٹ	real
585	حمل کے دوران مائیں کووڈ 19 کا شکار ہوئیں اور جب بچوں کی پیدائش ہوئیں تو ان میں وائرس کے خلاف لڑنے والی اینٹی باڈیز موجود تھیں۔	real
586	تحقیق میں چوہوں پر تجربات کے دوران دریافت کیا گیا کہ اسپائیک پروٹین، خون اور دماغ کے درمیان رکاوٹ کو عبور کرسکتا ہے۔	real
587	ویکسین دستیاب ہونے پر سب سے پہلے اسے فرنٹ لائن ورکرز کو لگایا جائے گا، دوسرے مرحلے میں سینئر شہریوں کو اسکی خوراک دی جائے گی،رپورٹ	real
588	پاکستان میں گزشتہ 24 گھنٹوں کے دوران 2 ہزار 972 افراد وائرس سے متاثر اور 84 انتقال کر گئے جبکہ 3 ہزار 261 مریض صحتیاب ہوئے۔	real
589	راشد خان چند روز قبل کورونا وائرس سے متاثر ہوئے تھے اور آج صبح انتقال کرگئے، ترجمان پی ٹی سی ایل	real
590	امریکا میں پہلے ایسے کووڈ 19 ٹیسٹ کے استعمال کی منظوری دی گئی ہے جو دکانوں سے خرید کر گھروں میں کیا جاسکتا ہے۔	real
591	اس سال جب کووڈ 19 کی وبا تیزی سے پھیل رہی ہے، وہاں متعدد موسمی بیماریوں کی شرح حیران کن حد تک کم ہے۔	real
592	کوروناسے متاثر دنیا کے سب سے بڑے ملک میں 15 دسمبر سے ویکسین کا استعمال شروع ہوا،ابتدائی طورپرعمر رسیدہ افراد کو ڈوزلگائے جائیں گے۔	real
593	20 ممالک میں ہونے والی 54 تحقیقی رپورٹس کے ایک تجزیے میں یہ نتیجہ نکالا گیا۔	real
594	شہر کے تیسرے سب سے بڑے ہسپتال کے خصوصی یونٹ کے لیے مقامی انتظامیہ مالی ضروریات کو پورا کرنے میں ناکام رہی ہے، رپورٹ	real
595	اسمارٹ فون کے ذریعے کووِڈ ٹیسٹ ظاہر کرنا اور اسے آگے پہنچانے کا خیال عمدہ اور قابل ستائش ہے، پاکستانی ہائی کمشنر	real
596	صوبہ سندھ میں اب تک 46 ڈاکٹرز کورونا وائرس کی وجہ سے انتقال کرچکے ہیں جس میں سے 26 کا تعلق کراچی سے تھا، رپورٹ	real
597	ملک میں اس وائرس سے متاثرہ افراد کی مجموعی تعداد 4 لاکھ 35 ہزار 56 ہے جس میں سے 3 لاکھ 81ہزار 208 صحتیاب ہوئے ہیں۔	real
598	گزشتہ 24 گھنٹوں کے دوران ملک میں وائرس سے مزید 3 ہزار 47 افراد وائرس سے متاثر ہوئے جبکہ 50 انتقال کر گئے۔	real
599	سب سے اپیل کر رہا ہوں کہ احتیاط کریں اور ایس او پیز پر عمل کریں، ماسک پہنیں، جلسوں سے وائرس پھیلنے کے خطرات زیادہ ہیں، عمران خان	real
600	ملک میں گزشتہ 24 گھنٹوں میں مجموعی طور پر مثبت کیسز کی شرح 7.78 فیصد رہی، کراچی میں یہ تناسب 21.80 فیصد ریکارڈ ہوا، این سی او سی	real
601	کووڈ-19 سے متعلق کئی سازشیں خیالات مغربی ممالک سے آئے ہیں جو سوشل میڈیا کے ذریعے پھیلے ہیں، قبلہ ایاز	real
602	داتا گنج بخش ٹاؤن،شالیمار ٹاؤن،سمن آباد،عزیز بھٹی ٹاؤن،علامہ اقبال ٹاؤن کے علاقوں میں21دسمبر تک اسمارٹ لاک ڈاؤن ہوگا، نوٹیفکیشن	real
603	کسی بھی علاقے میں بڑے پیمانے پر فیس ماسک کا استعمال چند دنوں میں کورونا وائرس کے نئے کیسز کی تعداد میں 45 فیصد تک کمی لاسکتا ہے۔	real
604	اداکارہ کے بھائی کے مطابق وہ 26 نومبر کو ہسپتال میں داخل ہوئی تھیں اور 28 نومبر کو ان میں کورونا وائرس کی تصدیق ہوئی تھی۔	real
605	ملک میں گزشتہ 24 گھنٹوں میں مجموعی مثبت کیسز کی شرح 9.71 فیصد رہی، کراچی میں یہ تناسب 21.31 فیصد ریکارڈ ہوا،این سی او سی کو بریفنگ	real
606	کورونا کے حوالے سے حالیہ اعداد و شمار تشویش ناک ہیں، سیاسی اجتماعات کورونا پھیلانے کا سبب بن رہےہیں، وفاقی وزیر اطلاعات	real
607	گزشتہ شب خیبرٹیچنگ ہسپتال میں آکسیجن کی فراہمی کی کمی کا واقعہ پیش آیا، معاملے کی تحقیقات کی ہدایت کردی ہے، صوبائی وزیر صحت	real
608	لیری کنگ ایک ہفتے سے زائد مدت سے لاس اینجلس کے سیڈارز سنائی میڈیکل سینٹر میں زیرِ علاج ہیں۔	real
609	یہ واضح نہیں کہ نئے کورونا وائرس کی کونسی علامات پہلے نظر آتی ہیں مگر ماہرین کے خیال میں انہوں نے ان نشانیوں کی شناخت کرلی ہے۔	real
610	گزشتہ 24 گھنٹوں میں صحتیاب ہونے والے افراد کی تعداد ایک ہزار 745 رہی، جس کے بعد فعال کیسز 35 ہزار 130 رہ گئے۔	real
611	پاکستان کی آبادی محض ایک کروڑ نہیں ہے اس لیے ہمیں ویکسین کی تیاری شروع کرنے کے لیے لائسنس حاصل کرنے کی ضرورت ہے، عائشہ حق	real
612	محکمہ صحت کے عملے کو سب سے پہلے ویکسین لگائی جائے گی جس کے بعد 65 سال سے زائد عمر کے افراد کو ترجیح دی جائے گی، این سی او سی	real
613	گزشتہ 24 گھنٹوں میں ملک میں 2 ہزار 475 نئے کیسز اور 58 اموات رپورٹ ہوئیں، فعال کیسز 34 ہزار 357 رہ گئے۔	real
614	دیگر کی طرح آکسفورڈ ویکسین کے بھی 2 ڈوز میں استعمال کرائی جائے گی، پہلے کے بعد دوسرا ڈوز 4 سے 12 ہفتوں کے دوران دیا جائے گا۔	real
615	لانگ کووڈ کی اصطلاح ایسے مریضوں کیلئے استعمال کی جاتی ہے جو بیماری کو شکست دے دیتے ہیں، مگر علامات مہینوں بعد بھی برقرار رہتی ہیں۔	real
616	کووڈ 19 کے عہد کا یہ منفرد سویٹر اس وقت ایک الارم بجانے لگتا ہے جب دیگر افراد آپ سے 6 فٹ سے کم دوری پر آجاتے ہیں۔	real
617	یہ نئی قسم یورپ، مشرق وسطیٰ، ایشیا، افریقہ، آسٹریلیا اور کینیڈا کے مختلف حصوں میں پہنچ چکی ہے۔	real
618	تمام آٹھوں خواتین کا تعلق آغا خان یونیورسٹی کے اسکول آف نرسنگ اینڈ مڈوائفری، سونم سے ہے، رپورٹ	real
619	عالمی برادری کو یہ یقینی بنانا ہے کہ وائرس کےخلاف ویکسین یکساں طور پر ہر ایک میں تقسیم کی جائے، اقوام متحدہ میں پاکستانی سفیر	real
620	اس تحقیق میں ماہرین نے کووڈ 19 کے مریضوں میں سامنے آنے والی علامات کی ترتیب بیان کی تھی۔	real
621	ملک بھر میں اس وقت کورونا وائرس کے 2 ہزار 357 مریضوں کی حالت تشویشناک ہے، نیشنل کمانڈ اینڈ آپریشن سینٹر	real
622	میں شہریوں کو ویکسین فراہم کرنے کے لیے ان کی خواہش اور مستقل پیروی کرنے پر سعودی ولی عہد کا شکریہ ادا کرتا ہوں، سعودی وزیر صحت	real
623	ملک میں کورونا وائرس کے مجموعی کیسز کی تعداد 4 لاکھ 67 ہزار 222 ہوگئی جس میں سے 4 لاکھ 18 ہزار 958 صحتیاب ہوئے ہیں۔	real
624	کورونا وائرس سے بننے والی اینٹی باڈیز آئندہ 6 ماہ یا اس سے بھی زیادہ عرصے تک لوگوں کو اس بیماری کا دوبارہ شکار ہونے سے بچاتی ہیں۔	real
625	حمل کی تیسری سہ ماہی میں کووڈ 19 سے متاثر ہونے والی خواتین سے یہ وائرس ان کے نومولود بچوں میں منتقل نہیں ہوتا، تحقیق	real
626	ان کے بیٹے بلال مقصود نے تصدیق کی کہ انور مقصود کا کورونا وائرس کا ٹیسٹ مثبت آیا ہے۔	real
627	گزشتہ 24 گھنٹوں میں ملک میں 4 ہزار 415 مریض صحتیاب ہوگئے، جس سے فعال کیسز کی تعداد 37 ہزار 905 رہ گئی۔	real
628	انٹار کٹیکا میں اب تک کورونا وائرس کا کوئی کیس سامنے نہیں آیا تھا مگر اب چلی کے تحقیقی مرکز میں اولین کووڈ کیسز سامنے آئے ہیں۔	real
629	عالمی ادارہ صحت (ڈبلیو ایچ او) کو بھی لکھا ہے کہ کورونا موجود نہیں، میرا مؤقف سنا جائے، درخواست گزار	real
630	تحقیق میں ہوا میں موجود ذرات سے تحفظ فراہم کرنے کے لیے فیس ماسکس کی افادیت جانچنے کا ایک منفرد طریقہ کار تیار کیا ہے۔	real
631	سینیٹر کلثوم پروین کورونا وائرس کا ٹیسٹ مثبت آنے کے بعد ہسپتال میں زیر علاج تھیں اور گزشتہ کئی روز سے وینٹی لیٹر پر تھیں۔	real
632	ماضی میں ہونے والی بحث میں اکثر نے اتفاق کیا کہ ویکسین جائز ہے جسے نہ استعمال کرنے پر بڑا نقصان ہوسکتا ہے، ڈاکٹر ہارون رشید	real
633	18ہزار رضاکاروں میں سے 15ہزار کو ویکسین لگائی جاچکی ہے، ایک اور ویکسین کے ٹرائل کا آغاز جنوری 2021 میں شروع ہونا متوقع ہے، رپورٹ	real
634	شاہ محمود قریشی کے یو اے ای کے حالیہ دورے کے موقع پر کووِڈ 19 سے پیدا ہونے والی مشکلات اور ان کے اثرات پر گفتگو کی گئی، رپورٹ	real
635	کووڈ 19 سے شکار ہر 10 میں سے ایک فرد کو اس بیماری کی علامات کا سامنا 12 ہفتے یا اس سے بھی زائد عرصے تک ہوتا ہے۔	real
636	گزشتہ 24 گھنٹوں میں مزید 4 ہزار 649 مریض شفایاب بھی ہوگئے، جس کے بعد فعال کیسز 40 ہزار 922 رہ گئے۔	real
637	امریکا کی کیلیفورنیا یونیورسٹی کی اس تحقیق میں فن لینڈ کی ایک کمپنی اورا کی تیار کردہ اسمارٹ رنگ کو آزمایا گیا۔	real
638	پاکستان میں کووِڈ 19 سے مزید 2 ہزار 545 افراد متاثر ہوئے اور 70 انتقال کر گئے، فعال کیسز کی تعداد 42 ہزار 851 ہے۔	real
639	کوئی بھی ویکسین جب مروجہ قانون کے مطابق رجسٹر ہوگی تو نجی سطح پر حصول کو ممکن بنایا جائے گا، معاون خصوصی	real
640	یہ خیال کیا جاتا ہےکہ چمگادڑ متعدد وائرسز، کووڈ- 19، سارس، مرس، ایبولا، نیپاہ وائرس، ہیندرا وائرس اوردیگر کےپھیلاؤ کی وجہ ہے۔	real
641	ملک میں کورونا وائرس کے مجموعی کیسز کی تعداد 4 لاکھ 43 ہزار 246 ہوگئی جس میں سے 3 لاکھ 86 ہزار 333 صحتیاب ہوئے ہیں۔	real
642	اس ٹول سے تخمینہ لگانے میں مدد مل سکے گی کہ کن افراد کو اس بیماری سے زیادہ خطرہ لاحق ہے اور انہیں ویکسینیشن میں ترجیح دینی چاہیے۔	real
643	بل گیٹس نے خبردار کیا ہے کہ آئندہ 4 سے 6 مہینے کورونا وائرس کی وبا میں بدترین ثابت ہونے والے ہیں۔	real
644	ملک میں گزشتہ 24 گھنٹوں میں کورونا وائرس کی مثبت کیسز کی شرح 7.98 فیصد رہی، کراچی میں یہ تناسب 18.92 فیصد رہا، این سی او سی	real
645	گزشتہ 24 گھنٹوں میں ایک ہزار 792 مریض شفایاب بھی ہوگئے، ملک میں فعال کیسز 46 ہزار 629 تک پہنچ گئے۔	real
646	امریکا سے قبل برطانیہ، کینیڈا اور سعودی عرب جیسے ممالک بھی فائزر و بائیو این ٹیک کی ویکسین کے استعمال کی منظوری دے چکے ہیں۔	real
647	ایک نئی تحقیق میں کہا گیا ہے کہ یہ بیشتر کیسز میں مریضوں میں پہلی علامت ہوسکتی ہے۔	real
648	گزشتہ 24 گھنٹوں میں ملک میں 56 کورونا مریض زندگی کی بازی ہار گئے، فعال کیسز 46 ہزار 376 تک جاپہنچے۔	real
649	ملک میں اس وائرس سے متاثرہ افراد کی مجموعی تعداد 4 لاکھ 26ہزار 142 ہے جس میں سے 3 لاکھ 72 ہزار 271 صحتیاب ہوئے ہیں۔	real
650	کووڈ 19 کی وبا کے متعدد سنگین پہلوؤں میں سے ایک یہ ہے کہ اس کے مریض دنیا سے کٹ کر انتقال کرجاتے ہیں اور پیاروں سے مل نہیں پاتے۔	real
651	پہلی خوراک صبح سویرے ایک ہسپتال میں دی گئی جہاں برطانیہ کے پروگرام کے ابتدائی مرحلے کو وی ڈے کے نام سے منسوب کیا جائے گا۔	real
652	میاں بیوی کے درمیان جھگڑے دنیا بھر میں عام ہیں مگر ایسا کبھی نہیں ہوتا کہ لڑائی کے بعد شوہر سکون کیلئے ایک ہفتے تک چلتا رہے۔	real
653	اس حوالے سے ایک اجلاس میں غور کیا جائے گا کہ اس طرح کے ٹرائلز پر عملدرآمد کس حد تک ممکن ہے۔	real
654	کورونا کے ٹیسٹ منفی آنے کے بعد قومی ٹیم کی ٹریننگ کی راہ ہموار ہو گئی، جلد ٹریننگ کی اجازت دیے جانے کا امکان ہے۔	real
655	نماز جمعہ کے اجتماعات صحن میں ہوں گے، کووڈ 19 کو پھیلنے سے روکنے کیلئے وضع کردہ ایس او پیز پر عملدرآمد ضروری ہے، حکام	real
656	متاثرہ افراد کی مجموعی تعداد 4 لاکھ 16ہزار 499 ہے جس میں سے 3 لاکھ 55 ہزار 12صحتیاب ہوئے ہیں جبکہ 8 ہزار 361 کا انتقال ہوا ہے۔	real
657	پولیس افسران اور سرکاری حکام اس بات پر متفق نظر آتے ہیں کہ فوج یا پولیس کی وردی کی فراہمی اتنی آسانی سے دستیاب نہیں ہونی چاہیے کیونکہ اس کے غلط استعمال کے واقعات بھی ہوتے ہیں جہاں کبھی کوئی یہ یونیفارم پہن کر عوام کو لوٹتا ہے تو کوئی قتل سمیت دیگر جرائم کا ارتکاب کرتا ہے۔	real
658	’اگر کسی کو کربلا کا منظر دیکھنا ہے تو وہ میرے خاندان کو دیکھ لے۔ ہمارے خاندان میں جنازہ اٹھانے والا کوئی مرد نہیں بچا۔ جس کے بعد ہم چھ بہنوں نے فیصلہ کیا ہے کہ ہم اپنے بھائی اور اپنے رشتہ داروں کے جنازے خود اٹھائیں گے۔‘	real
659	نیوزی لینڈ نے دوسرے دن کے کھیل کا اختتام 286 رنز 3 کھلاڑی آؤٹ پر کیا یعنی پاکستان کے اسکور 297 سے وہ صرف 11رنز پیچھے ہے اور ابھی اس کی 7 وکٹیں پوری طرح محفوظ ہیں۔	real
660	زینب ریپ کیس کے بعد حکومت پاکستان کی جانب سے سنہ 2019 میں ’زینب الرٹ بل‘ کے نام سے ایک بل پیش کیا گیا، جس کے تحت کسی بھی بچے کے اغوا یا اس کے ساتھ جنسی زیادتی کے واقعے کا مقدمہ درج ہونے کے تین ماہ کے اندر اس مقدمے کو مکمل کرنا ہو گا۔	real
661	اگر آپ سوشل میڈیا صفحات پر نظر دوڑائیں تو آپ کو مختلف صفحات ایسے علاقوں کے بھی نظر آئیں گے جہاں دس سال پہلے تک انٹرنیٹ کی سہولت موجود نہیں تھی۔ یہ صفحات بتدریج ایسے لوگوں کے بارے میں معلومات جانچنے کی تگ و دو میں مصروف ہیں جن کو کئی سال پہلے یا حال ہی میں اٹھایا گیا۔	real
662	کلدیپ نیئر نے کہا کہ ’اگر آپ دس بم بنائیں گے تو ہم ایک سو بنائیں گے‘ جس پر عبدالقدیر نے جواب دیا کہ ’اتنی بڑی تعداد میں بم بنانے کی ضرورت نہیں۔ تین یا چار ہی دونوں طرف کافی ہوں گے۔‘	real
663	پاکستان کے صوبہ بلوچستان میں حکام کا کہنا ہے کہ مچھ میں کوئلہ فیلڈ میں نامعلوم مسلح افراد کے حملے میں کم از کم 10 کان کن ہلاک ہوگئے ہیں۔ شدت پسند تنظیم دولت اسلامیہ نے اس حملے کی ذمہ داری قبول کی ہے۔	real
664	; "والٹن روڈ پر چچا نے بھتیجی کو گولی مار کر قتل کر دیا۔ پولیس کے مطابق ملزم نے اصرا نامی 15 سالہ بچی کو سر پر گولی ماری، ملزم کی بچی کی والدہ سے رنجش تھی، ملزم کاشف نے اپنے پیٹ پر گولی مار کر خود کو بھی شدید ذخمی کر لیا۔"; زخمی ملزم کاشف کو جنرل ہسپتال متنقل کر دیا گیا جبکہ پولیس نے بچی کی لاش پوسٹ مارٹم کے لیے مردہ خانے منتقل کردی۔	real
665	; "پیسوں کی لالچ نے انسان کو اندھا بنادیا، بیوی نے اپنے مجازی خدا کو آشنا کے ساتھ مل کر ابدی نیند سلادیا، پولیس کے مطابق چند روزقبل ٹاؤن شپ میں عامر علی کو سر میں گولی مار کر قتل کر دیا گیا تھا، جس کی تفتیش کے لیے عامر کی بیوی نورین کو بلایا گیا، دوران تفتیش بیوی کے بیانات سے پولیس کو شک ہوا کہ جیسے معاملہ کچھ اور ہے، جب بیوی کا موبائل ریکارڈ چیک کیا گیا ور سی سی ٹی وی کیمروں سے عامر کے قتل کی ت…	real
666	; "چند روز قبل چوہنگ کے علاقے میں قتل ہونے والے پینٹر اسحاق کے قاتل کو گرفتارکرلیا گیا۔ مقتول اسحاق احمد کو چوہنگ کے علاقے جوبلی ٹاؤن میں قتل کیا گیا تھا جبکہ ملزم چوہدری ابرار واردات کے بعد فرار ہو گیا تھا، پولیس نے ملزم کو بہاول نگر سے گرفتار کیا۔ مقتول اسحاق احمد بابافرید کالونی چونگی امر سدھو کا رہائشی ہے۔پولیس کے مطابق گرفتار ملزم چوہدری ابرار مقتول اسحاق کا استاد ہے۔ جبکہ ملزم اور مقتول کے …	real
667	; "کوٹ لکھپت میں 17 سالہ لڑکے ساجد نے باپ کو ڈانٹ کے دوران سر پر بھاری چیز دے ماری۔ لواحقین کا کہنا ہے کہ ملزم ساجد گھر لیٹ آیا، جس پر والد نے بیٹے کو مارا، اور موبائل فون کا پوچھا، بیٹے نے کہا کہ موبائل فون گم گیا ہے، جس پر باپ نے مزید پٹائی کردی، باپ کی ڈانٹ سے دلبرداشتہ ہو کر ملزم نے باپ کے سر پر بھاری چیز مار دی اور موقع سے فرار ہوگیا۔"; پولیس نے واقعے کا مقدمہ مقتول کے والد اور قاتل کے دادا …	real
668	; "ہیر کے علاقہ میں ہر پالکی گاوں میں گھر کی چھت سے انیس سالہ نوجوان کی خون میں لت پت لاش برآمد ہوئی۔ پولیس کا کہنا ہے کہ نوجوان کو دو گولیاں ایک سر میں اور دوسری پیٹ میں لگی ہے، واقعہ قتل ہے یا خود کشی تحقیقات اور پوسٹمارٹم رپورٹ میں واضح ہوگا۔ متوفی کی شناخت اللہ بخش کے نام سے ہوئی۔ پولیس نے جائے وقوعہ سے شواہد اکھٹے کر کے لاش کو پوسٹمارٹم کیلئے مردہ خانے منتقل کر دیا اور جائے قوعہ سے ملنے والی…	real
669	ہمارے لیے یہ کان کن انسان نہیں سائے ہیں۔ کسی سائے کی موت پر آخر کتنی دیر افسردہ رہا جا سکتا ہے۔ ٹی وی پر چلنے والی خبری پٹی ختم تو خود احستابی کا دکھ بھی ختم۔ پڑھیے وسعت اللہ خان کا کالم بات سے بات	real
670	طبی ماہرین کے مطابق اس وقت پاکستان کے سرکاری ہسپتالوں میں کورونا مریضوں کے لیے جگہ کم ہی دستیاب ہے۔ جس وجہ سے ایسے مریضوں کو جن میں علامات زیادہ نہیں ہوتیں یا کم عمر لوگوں کو گھر ہی میں میں علاج کا مشورہ دیا جاتا ہے اور ان میں سے اکثر مریضوں کو آکسیجن کی ضرورت پڑتی ہے۔	real
671	پاکستان کے بانی محمد علی جناح کی بہن محترمہ فاطمہ جناح نے جب جنرل ایوب خان کے مقابلے میں انتخابات میں حصہ لیا تو ان پر کئی الزامات لگائے گئے، انھیں غدار، انڈین اور امریکی ایجنٹ تو کہا ہی گیا لیکن اس کے ساتھ ساتھ جنرل ایوب خان نے ان کے بارے میں دو ایسے الفاظ بھی کہے جو پوری طرح خواتین سے نفرت اور تعصّب کے زمرے میں آتے ہیں۔	real
672	اب تو لکھتے ہوئے بھی رائیگانی کا احساس ہی رہتا ہے۔ پتھر کی سماعتوں پر ہمارے الفاظ کیا اثر کریں گے؟ جو دل سانحہ ساہیوال پر نہ پسیجے، جو کلیجے تربت کے واقعے پر نہ پھٹے، جن کو سرفراز کی موت پر شرم نہ آئی انھیں اب کیا فرق پڑے گا؟ پڑھیے آمنہ مفتی کا کالم۔	real
673	پاکستان کے صوبہ بلوچستان کے دارالحکومت کوئٹہ میں ہائی کورٹ کے باہر بلوچ یکجہتی کمیٹی نے سیاسی رہنما کریمہ بلوچ کی ہلاکت اور انسانی حقوق کے حصول کے لیے احتجاجی مظاہرہ کیا۔	real
674	پاکستان اور انڈیا کے درمیان جوہری تنصیبات کی معلومات کے تبادلے کے معاہدے پر 31 دسمبر سنہ 1988 کو دستخط کیے گئے تھے اور وہ 27 جنوری سنہ 1991 سے نافذ العمل ہے۔ اس کے تحت انڈیا اور پاکستان ہر سال یکم جنوری کو جوہری تنصیبات کے بارے میں ایک دوسرے کو آگاہ کرتے ہیں۔	real
675	گذشتہ رات پاکستان کے دارالحکومت اسلام آباد میں انسداد دہشت گردی فورس کی ایک گاڑی پر فائرنگ سے کار سوار طالب علم اسامہ ندیم ستی ہلاک ہو گئے ہیں جس کے بعد سے سوشل میڈیا پر اس واقعے کی مذمت کی جا رہی ہے۔	real
676	پاکستان ڈیموکریٹک موومنٹ کے صدر مولانا فضل الرحمٰن نے کہا ہے کہ ’ہم اس بات پر متفق ہیں کہ پاکستان کو ایک ڈیپ سٹیٹ بنا کر اسٹیبلشمنٹ نے پورے نظام کو یرغمال بنایا ہے اور عمران خان ایک مہرہ ہیں جن کے لیے انتخابات میں دھاندلی کی گئی اور ان کو قوم پر مسلط کیا اور ایک جھوٹی حکومت قائم کی۔‘	real
677	100 نرسوں کی عالمی فہرست میں شامل ہونے والی ڈاکٹر روزینہ کہتی 'جب میں نے نرسنگ میں کام شروع کیا تو اس وقت مریضں اور ان کے رشتہ دار کہتے تھے کہ کیا آپ کے بھائی یا والد کما کر کھلا نہیں سکتے جو نرسنگ میں آ گئی ہو۔۔‘	real
678	پاکستان کے وفاقی تحقیقاتی ادارے نے کراچی کے علاقے گلشن اقبال میں کارروائی کر کے بچی کو ہراساں کرنے اور غیر اخلاقی تصاویر کے ذریعے بلیک میل کرنے والے ملزم کو گرفتار کر لیا ہے۔	real
679	پاکستان کے صوبہ پنجاب کے دارالحکومت لاہور کے سی سی پی او عمر شیخ کو عہدے سے ہٹا دیا گیا ہے اور ان کی جگہ غلام محمود ڈوگر کو تعینات کیا گیا ہے۔	real
680	شہد کی صنعت سے وابستہ لوگوں کے مطابق اگر شہد کی پیداوار کے لیے موزوں درخت لگائے جائیں تو لاکھوں افراد اس کاروبار سے فائدہ اٹھا سکتے ہیں اور ملک کے لیے زر مبادلہ بھی کما سکتے ہیں۔	real
681	حیدرآباد ٹربیونل کے خاتمے اور قیدیوں کی رہائی کے باوجود یہ سوال اہم رہا کہ حیدرآباد سازش کیس کی حقیقت کیا تھی اور اس میں کن کن لوگوں کو کس انداز میں شامل گیا گیا۔	real
682	پاکستان میں کسی مذہبی اقلیت کی عبادت گاہ کو نقصان پہنچانے کا یہ کوئی پہلا واقعہ نہیں لیکن اس حالیہ واقعے نے ایک بار پھر سوشل میڈیا پر پاکستان میں مذہبی اقلیتوں کے ساتھ برتے جانے والے تعصب کے بارے میں بحث چھیڑ دی ہے۔	real
683	پاکستان میں رمضان اور شوال کا چاند ہمیشہ سے ہی تنازعات کی زد میں رہتا ہے، کبھی کسی ایک صوبے میں عید کا اعلان پہلے کر دیا جاتا ہے تو کبھی ’سائنس بمقابلہ مذہب‘ کی بحث شروع ہو جاتی ہے۔	real
684	پاکستان ایئر فورس کے مطابق بلاک تھری کے جے ایف 17 طیارے سب سے زیادہ ایڈوانس ماڈل ہوں گے اور اس کی مدد سے پاکستان کو علاقے میں بدلتی ہوئی صورتحال میں مزاحمت کی قوت میں توازن برقرار رکھنے میں مدد ملے گی۔	real
685	پاکستان کے صوبہ سندھ سے لاپتہ افراد کے لواحقین کے پیدل مارچ کو پنجاب اور سندھ کی سرحد پر روک دیا گیا ہے اور خواتین سمیت دو درجن افراد کو حراست میں لے لیا گیا ہے۔ یہ مظاہرین پاکستانی فوج کے ہیڈ کوارٹر جی ایچ کیو جا کر اپنا احتجاج رجسٹر کرانا چاہتے ہیں۔	real
686	کراچی میں لاپتہ شیعہ افراد کے اہلخانہ کا دھرنا تو کچھ افراد کی واپسی اور کچھ کی گرفتاری ظاہر کیے جانے کے بعد ختم ہو گیا لیکن کچھ خاندان تاحال اپنے پیاروں کی واپسی کے منتظر ہیں۔	real
687	صوبہ خیبر پختونخواہ کے ضلع کرک کی پولیس کے مطابق تحصیل بانڈہ داؤد شاہ کے علاقے ٹیری میں مشتعل مظاہرین نے مندر کی توسیع کو روک دیا ہے۔ اس موقع پر مظاہرین نے مندر میں توڑ پھوڑ بھی کی۔	real
688	کورونا کی دوسری لہر کے دوران دسمبر کے مہینے میں تین مرتبہ نیشنل کمانڈ اینڈ کنٹرول سنٹر اسلام آباد نے اپنے جاری کردہ اعداد و شمار کی روشنی میں بتایا کہ ایبٹ آباد کورونا کے پازیٹو کیسز کے حوالے سے ملک بھر میں پہلے نمبر پر آیا ہے، لیکن اس کی وجوہات کیا ہیں؟	real
689	کچن چلانا جہاں پاکستان کی بیشر خواتین کے لیے قابلِ فخر بات ہے، وہیں کچھ افراد عورتوں کی قابلیت کو بس کچن چلانے تک ہی محدود سمجھتے ہیں۔ اور ایسے تبصرے کہ اگر کسی عورت نے گھر کا کچن نہیں چلایا اور اس بنیاد پر وہ ملک چلانے کی اہلیت نہیں رکھتیں، کیا یہی مردوں پر بھی لاگو نہیں ہونے چاہیں؟	real
690	پاکستان مسلم لیگ نواز کے سینیئر رہنما خواجہ آصف نے 1993 سے 2013 تک ہونے والے عام انتخابات میں مسلسل کامیابیاں حاصل کیں۔ ان کا شمار پاکستان کے اہم سیاستدانوں میں ہوتا ہے۔	real
691	ناصرہ نواز نے اپنے شوہر کی بیماری کے بعد گھر کا خرچہ چلانے کے لیے مارکیٹوں میں گھر کا کھانا فراہم کرنا شروع کیا اور اب لوگ ان سے فرمائش کر کے بھی کھانا پکواتے ہیں۔	real
692	پاکستان پیپلز پارٹی کے چیئرمین بلاول بھٹو نے کہا ہے کہ پارٹی کی سینٹرل ایگزیکٹو کمیٹی نے پاکستان ڈیموکریٹک موومنٹ کی جانب سے 31 دسمبر کو ارکان سے استعفے لینے اور وزیراعظم کو 31 جنوری تک استعفیٰ دینے کی مہلت کے فیصلوں کی توثیق کی ہے۔	real
693	پاکستان کے قومی احتساب بیورو (نیب) نے مسلم لیگ ن کے سینیئر رہنما خواجہ آصف کو آمدن سے زائد اثاثوں کے کیس میں گرفتار کر لیا ہے۔ مریم نواز نے خواجہ آصف کی گرفتاری پر ردعمل دیتے ہوئے کہا ہے کہ ’یہ گرفتاری نہیں بلکہ اغوا ہے۔‘	real
694	سندھ میں ڈاکوں کا راج تھا لیکن محکمہ جنگلات کا ایک ضلعی افسر دوستوں اور حکام کی وارننگ کو نظر انداز کرکے اپنے فرائض سرنجام دینے چل پڑا اور اس افسر کو دادو کے علاقے پھلجی سے اس وقت کے مشہور ڈاکو پرو چانڈیو نے اغوا کرلیا اور کچھ عرصے کے بعد اس کو چھوڑ دیا۔	real
695	طاہرہ عبداللہ نے جیو ٹی وی کے پروگرام کا حوالہ دیتے ہوئے کہا کہ ہمارے پروگرام کے اینکرز کا رویہ بھی دیکھا جائے آئے تو اس سے صاف ظاہر ہوتا ہے کہ سب سے پہلے مردوں کو بات کرنے کی اجازت دی جاتی ہے جبکہ جو وقت بچ جاتا ہے اس میں خاتون کی رائے لی جاتی ہے۔	real
696	اسلامی نظریاتی کونسل کے سابق چیئرمین اور جمیعت علمائے اسلام کے سینئر رہنما مولانا شیرانی نے کہا کہ وہ کبھی بھی جے یو آئی ف یا مولانا فضل الرحمان گروپ کا حصہ نہیں رہے۔ انھوں نے کہا کہ وہ ہمیشہ جمعیت علمائے اسلام کے دستور کے مطابق رکن رہے اور رہیں گے۔	real
697	پاکستان کی آٹو انڈسٹری میں آنے والی نئی کمپنیوں سے پاکستانی صارفین نے یہ امید باندھ لی تھی کہ ان کو سستی اور معیاری گاڑیاں دستیاب ہو پائیں گی لیکن ان کمپنیوں نے توقعات کے برعکس مارکیٹ میں ایسی گاڑیاں متعارف کروائی ہیں جو چھوٹی گاڑی لینے والے صارفین کی پہنچ سے کافی دور ہیں۔	real
698	اکرم خان کو ان کے گھریلو ملازمین نے ان کے بچپن میں کئی سالوں تک جنسی عمل کا نشانہ بنایا جس کے باعث وہ آج تک ذہنی اذیت محسوس کرتے ہیں مگر اب وہ اپنے بچوں کو سیکس ایجوکیشن دینے کے لیے پرعزم ہیں تاکہ ان کے ساتھ وہ سب کچھ نہ ہو۔	real
699	پیپلز پارٹی گیم میں ’اِن‘ رہتے ہوئے پانسہ پلٹنا چاہتی ہے، مسلم لیگ (ن) گیم سے آؤٹ ہونا نہیں چاہتی اور مولانا گیم سرے سے کھیلنے کے ہی مخالف ہیں، ایسے میں کھیل کون جیتے گا اور بازی کس ہاتھ آئے گی؟	real
700	موٹروے پر پیش آنے والے ایک حادثے کے بعد جہاں زیادہ تر لوگ مدد کے بجائے تصاویر اور ویڈیوز بنانے کے لیے رکے وہیں ایک شخص جنھوں نے رک کر حادثے کا شکار خاندان کی مدد کی، مدد کے بجائے ویڈیوز بنانے والے انسانی رویے کے متعلق سوشل میڈیا پر آواز اٹھا رہے ہیں۔	real
701	شیخ ایاز نے تمام منفی قوتوں کو للکارنے کی تحریک کی صورت اختیار کر لی اور نتیجے میں سنہ 1962 سے لے کر سنہ 1964 تک ان کی شاعری کے تین مجموعوں پر پابندی عائد کر دی گئی۔	real
702	بابر نے سنہ 1526 میں پانی پت کی پہلی جنگ میں ابراہیم لودھی کو شکست فاش دے کر ہندوستان میں ایک ایسی سلطنت قائم کی جس کے قبضے میں اس وقت دنیا کی ایک چوتھائی سے زیادہ دولت تھی اور جس کا رقبہ تقریبا پورے برصغیر بشمول افغانستان تک محیط تھا۔	real
703	پاکستان میں رائج نظام عدل اور اس میں پھنسی اپنی زندگی کے گزرے 15برس پر نظر دوڑاتے سہیل یاتف کہتے ہیں کہ 'دس یا پندرہ برس بعد عدالت آپ سے کہہ دیتی ہے کہ با عزت بری۔ کیا یہ دو الفاظ ان پندرہ برسوں کا مداوا ہو سکتے ہیں؟'	real
704	پاکستان پیپلز پارٹی کی چیئرپرسن بے نظیربھٹو امریکہ سے اپنی سکیورٹی اور بلٹ پروف جیکٹ چاہتی تھیں لیکن امریکی حکومت نے یہ کہہ کر یہ درخواست مسترد کردی کہ وہ صرف ملکی سربرہان کو سکیورٹی فراہم کرسکتے ہیں۔	real
705	انٹرنیشنل کرکٹ کونسل نے اتوار کو کرکٹ کے تینوں فارمیٹس ٹیسٹ، ون ڈے اور ٹی ٹوئنٹی کی اس دہائی کی ٹیموں کا اعلان کیا ہے۔ مگر آئی سی سی کی جانب سے دہائی کی ٹیموں کا اعلان پاکستانی سوشل میڈیا صارفین کو ایک نظر نہیں بھایا۔	real
706	مریم نواز نے دعویٰ کیا ہے کہ وزیر اعظم عمران خان اب این آر او مانگ رہے ہیں اور انھوں نے اس مقصد کے لیے اپنا پیامبر شہباز شریف کے لیے جیل بھیجا۔ ان کے مطابق خاندان والوں کی شہباز شریف سے ملاقات کے لیے ایک ہفتہ لگ جاتا ہے جبکہ میسنجر کے لیے فوراً جیل کے دروازے کھول دیے گئے۔	real
707	فوج کے تعلقاتِ عامہ آئی ایس پی آر کے مطابق بلوچستان کے ضلع ہرنائی میں شدت پسندوں نے فرنٹیئر کور کی ایک چیک پوسٹ پر حملہ کیا جس کے نتیجے میں سات اہلکار ہلاک ہو گئے۔	real
708	دنیا جتنی بھی کپتی کمینی ہو جائے۔ اس سے جتنا بھی دل اوبھ جائے پر کون ہے جس کا یہاں سے جانے کو جی چاہے۔ یہ کم بخت امید چیز ہی ایسی ہے۔ اسی امید کے جز دان میں لپٹی نئے سال کی مبارک باد قبول کیجیے۔ پڑھیے وسعت اللہ خان کا کالم۔	real
709	26 دسمبر 2007 کی رات جب بے نظیر بھٹو ایک لانگ ڈرائیو کے بعد اسلام آباد پہنچیں تو وہ بہت تھک چکی تھیں لیکن آئی ایس آئی کے سربراہ میجر جنرل ندیم تاج کا پیغام ان تک پہنچا تھا کہ وہ ایک اہم کام کے لیے ان سے ملنا چاہتے ہیں۔ ندیم تاج نے انھیں بتایا کہ اس دن کوئی انھیں قتل کرنے کی کوشش کرے گا۔	real
710	پچھلے دو ڈھائی سال کے سیاسی حالات ہمیں بہت کچھ بتاتے ہیں۔ شہباز شریف صاحب کے پاس وقت کم ہے وہ بلاول اور مریم کی طرح لمبی اننگ کھیلنے نہیں آئے اور اپنی باری کے منتظر نہیں۔ وہ تو اپنی اننگ کھیل رہے تھے کہ ان کو بیچ کھیل کے اٹھا کے باہر کر دیا گیا۔ پڑھیے آمنہ مفتی کا کالم۔	real
711	چکوال میں ترقیاتی منصوبوں کا سنگ بنیاد رکھنے کی تقریب سے خطاب کرتے ہوئے عمران خان کا کہنا تھا کہ ’پاکستان کی اپوزیشن جس طرح ملکی تاریخ میں پہلی مرتبہ پاکستانی فوج، آرمی چیف، آئی ایس آئی کے سربراہ کو تنقید کا ہدف بنا رہی ہے اس کی ماضی میں کوئی مثال نہیں ملتی۔‘	real
712	شمس الرحمان فاروقی کی علمیت اور وسعت مطالعہ حیران کن تھی، تجزیہ کاری اور ترکیب کاری کے اوصاف نے ان کی تنقید میں استدلال کا ایک منفرد انداز پیدا کر دیا تھا جس سے ان کے حریف بھی متاثر تھے۔	real
713	مراد علی صرف 15 برس کے تھے جب ان کی والدہ پروین شاکر ایک ٹریفک حادثہ میں جانبر نہ ہو سکیں اور صرف ماں اور بیٹے پر مشتمل مختصر سا خاندان مزید ادھورا ہو گیا۔	real
714	پاکستان مسلم لیگ ن کی قیادت نے حکومت کے ساتھ کسی بھی قسم کے ڈائیلاگ کے امکانات کو مسترد کرتے ہوئے کہا ہے کہ ان مذاکرات کا مقصد ’حکومت کو این آر او دلوانا ہے‘۔	real
715	اگر پاکستان نمبر سات پر آل راؤنڈر کو کھلانا چاہتا ہے تو فہیم اشرف بہترین انتخاب ہو سکتے ہیں۔ لیکن اگر ٹاپ آرڈر کسی بحران کا شکار ہو جاتا ہے تو شاید چھ بلے باز کھلانے کا فیصلہ کافی مہنگا پڑے۔	real
716	لاہو اسلام آباد موٹروے پر گہری دھند کے باعث ٹریفک کی آمد و رفت کی بندش پر شہزاد رائے کے ویڈیو پیغام پر سوشل میڈیا صارفین نے انھیں سراہا۔	real
717	کریمہ بلوچ کے دوستوں کا کہنا ہے کہ وہ ایک نڈر بلوچ خاتون تھیں اور مشکل سے مشکل وقت میں بھی ان کے چہرے پر پریشانی نہیں دیکھی۔ وہ بلوچی میں شاعری کرتی تھیں اور انھیں گلزار بہت پسند تھا اس کے علاوہ وہ پکاسو کے کام اور لیڈی ڈیانا کی شخصیت سے بھی متاثر تھیں۔	real
718	فیصل قریشی کے مطابق ’لوگ کیا کہیں گے‘ دیکھ کر سوشل میڈیا صارفین نے ان سے متعدد بار پوچھا کہ ’آپ دونوں شادی کب کریں گے؟‘ ایسے لوگوں کو فیصل کا جواب ہوتا ہے کہ ’یہ ڈرامہ شادی بیاہ کے بارے میں نہیں ہے، رشتوں کے بارے میں ہے، دوستی کے بارے میں ہے، خواتین کی خودمختاری کے بارے میں ہے۔‘	real
719	پاکستان میں مذہبی اقلیتوں کو اکثر تعصب کا سامنا کرنا پڑتا ہے اور کچھ افراد تو دوسرے مذاہب کی عبادت گاہوں میں داخل ہونا بھی پسند نہیں کرتے۔ لیکن محمد سرور اور ان کے بھائیوں نے راولپنڈی کے تاریخی کرائسٹ چرچ کی مرمت کا کام پوری دلجوئی سے کیا۔	real
720	عوام دوست سول سرونٹ محمد مسعود ایمانداری سے محسوس کرتے تھے کہ اگر ملک میں زرعی اصلاحات نافذ نہ کی گئی تو کمیونزم کا راستہ روکنا مشکل ہو جائے گا مگر اس کے برعکس علمائے کرام نے ان پر کمیونسٹ ہونے کا الزام لگایا۔	real
721	کراچی اور مولانا مسعود اظہر کا گہرا تعلق رہا ہے۔ انھوں نے جہاد کی دنیا میں قدم رکھنے سے قبل یہاں کے مدرسہ بنوری ٹاؤن میں تعلیم حاصل کی۔ جیش محمد کا قیام بھی یہیں عمل میں لایا گیا تھا۔	real
722	اس روایت کے تحت اکثر اوقات کوئی بھی مرد کسی مکان کے باہر اگر یہ اعلان کردے کہ اس گھر میں مقیم خاتون سے وہ شادی کرے گا تو پھر کوئی اور اس سے شادی نہیں کر سکتا تھا اور پھر وہ خاتون اکثر ساری زندگی ایسے ہی گزار دیتی تھی۔	real
723	اگرچہ ٹورونٹو پولیس نے سماجی کارکن کریمہ بلوچ کی موت سے متعلق کسی قسم کی گڑبڑ کا شبہ خارج کیا ہے تاہم ان کا خاندان حیران ہے کہ پولیس کیسے اس نتیجے پر پہنچ سکتی ہے۔ دوسری جانب پاکستان سمیت دنیا بھر سے انسانی حقوق کی تنظیمیں اور بڑی تعداد میں لوگ لاپتہ افراد کی بازیابی کے لیے ان کی کوششوں کو سراہتے ہوئے انھیں خراج عقیدت پیش کر رہے ہیں۔	real
724	یہ کہانی اُس انڈین طیارے کی ہے جسے اڑان بھرنے کے بعد ہائی جیک کیا گیا اور پھر اسے تین ہوائی اڈوں پر اتارنے کے بعد قندھار پہنچایا گیا جہاں عسکریت پسند رہنماؤں کی رہائی کے مطالبے پورے ہونے کے بعد مسافروں کو رہا کیا گیا۔	real
725	اطالوی نژاد 34 برس کی تمارا لونگر موسم سرما کی ہولناک سردی میں پاکستان میں واقع دنیا کی دوسری بلند ترین چوٹی کے ٹو کو سر کرنا چاہتی ہیں جو اب تک کوئی دوسرا انسان نہیں کر سکا۔	real
726	پاکستان نے استنبول تک ریل سروس بحالی کے منصوبے کی حامی بھر لی ہے۔ اس وقت اس ٹرین کو کس طرح کے مسائل کا سامنا ہے اور پاکستان اس سروس کو چلانے کے لیے کتنا تیار ہے۔ بی بی سی نے ان سوالوں کے جواب جاننے کے لیے پاکستانی حکام اور ماہرین سے بات کی ہے۔	real
727	پاکستان کو قرض دینے والے مغربی ممالک کے ایک گروپ پیرس کلب نے حال ہی میں پاکستان کے ایک اعشاریہ سات ارب ڈالر کے قرض کی ادائیگی کو مزید موخر کرنے کا اعلان کیا ہے لیکن سعودی عرب نے قرض کی جلد واپسی کا مطالبہ کیا جس پر پاکستان کو چین کی مدد لینا پڑی۔	real
728	مقامی اور سوشل میڈیا پر موجود پاکستان پیپلز پارٹی سے تعلق رکھنے والے ایک سیاستدان کی بیٹی کی شادی کی ویڈیوز اور تصاویر میں دیکھا جا سکتا ہے کہ وزیراعلیٰ پنجاب کے علاوہ دیگر سیاستدان اور معروف شخصیات نے بھی تقریب میں شرکت کی، جن میں سے بیشتر نے ماسک کی پابندی اور کورونا ایس اور پیز پر عمل نہیں کیا۔	real
729	اگر صورتحال نہ بدلی تو سنہ 2020 سے آپ کو جہاز بھر بھر کر سعودی عرب سے آنے والے پاکستانیوں کو ویلکم کرنا پڑے گا اور دوسری جانب آپ خود کہہ چکے ہیں کہ ہمارے ہاں بے روزگاری بہت ہے۔	real
730	لاپتہ معروف بلوچ سیاسی کارکن اور بلوچ سٹوڈنٹس آرگنائزیشن کی سابق چیئرپرسن کریمہ بلوچ کی لاش کینیڈا کے شہر ٹورنٹو سے ملی ہے۔ پولیس کے مطابق کریمہ بلوچ کو آخری بار اتوار 20 دسمبر 2020 کو تقریباً دوپہر تین بجے دیکھا گیا تھا، جس کے بعد سے وہ لاپتہ تھیں۔	real
731	تحریک انصاف کی حکومت کی کارکردگی ایک کامیاب عوامی تحریک کا موجب بن سکتی ہے مگر اپوزیشن جماعتیں بجائے حکومت کو دفاعی صورت حال سے دوچار کرنے کے خود مدافعانہ حیثیت اختیار کرتی دکھائی دیتی ہیں۔	real
732	اس ماہ کے آغاز سے برطانیہ میں کورونا وائرس کی ایک نئی قسم سامنے آنے کے بعد دنیا کے بیشتر ممالک نے برطانیہ سے سفری رابطے منقطع کر دیے اور اب پاکستان نے بھی برطانیہ سے مسافروں کی آمد پر پابندی عائد کر دی ہے۔	real
733	سی ڈی اے کی جانب سے عمران خان کے گھر کے نقشے کو مشروط اجازت دینے اور اس حوالے سے کنسلٹینٹ بھرتی کرنے کا خط 05 مارچ 2020 کو جاری کیا گیا تھا تاہم نو مہینے گزرنے کے باوجود ابھی تک کوئی کنسلٹینٹ نہیں رکھا جا سکا۔	real
734	لاہور سے ایک ویڈیو سامنے آئی ہے جس میں ایک خاتون کو پولیس اہلکاروں کو گالیاں دیتے اور ان پر ہاتھ اٹھاتے ہوئے دیکھا جا سکتا ہے جس کے بعد ان خاتون کے خلاف مقدمہ درج کر لیا گیا ہے اور پولیس کے رویے کو سراہا جا رہا ہے۔	real
735	وزیراعظم پاکستان عمران خان نے ماضی کی طرح اتوار کو ایک بار پھر عالمی برادری کو انڈیا کی جانب سے ممکنہ فالس فلیگ آپریشن سے متعلق خبردار کیا ہے۔ پاکستانی حکام ماضی میں یہ وارننگز دیتے رہے ہیں البتہ انڈیا ایسا کیوں کر سکتا ہے اس بارے میں پاکستانی حکام کی جانب سے ہر بار مختلف وجوہات بیان کی جاتی رہی ہیں۔	real
736	حیدر علی کی عمر کے لگ بھگ محمد حفیظ کا تجربہ ہے، دوسرا یہ کہ وہ ان کنڈیشنز میں اوپننگ کر بھی چکے ہیں اور تیسری اور اہم ترین بات یہ کہ بابر کے علاوہ اس سکواڈ میں وہ واحد کھلاڑی ہیں جو سٹروک بنانے کے ماہر ہیں۔ پاکستان کو اگر بابر اعظم کا خلا پُر کرنے کے لیے کوئی خطرہ مول لینا ہی تھا تو محمد حفیظ سے اوپن کروانا زیادہ بہتر رسک ہوتا۔	real
737	ابھی ویکسین آزمائشی مراحل میں ہی تھی کہ یہ بحث اٹھ گئی کہ جن اجزا سے یہ ویکسین تیار کی جا رہی ہے وہ اجزا حلال ہیں کہ حرام اور کہیں یہ مردانہ قوت تو نہیں چھین لے گی؟ پڑھیے وسعت اللہ خان کا کالم۔	real
738	پاکستان سے انڈیا لائی جانے والی قوتِ سماعت و گویائی سے محروم لڑکی گیتا کی شادی کی تیاریاں ہیں لیکن ابھی تک انھیں کوئی لڑکا پسند نہیں آیا ہے۔	real
739	پاک چین دوستی کا جو فریم ژو این لائی نے سوچا ہو گا، آج بھی وہی چل رہا ہے۔ پاکستان کا چین کے ساتھ کوئی دفاعی معاہدہ نہیں تاہم پاکستان اپنے دفاع، میزائل پروگرام اور جوہری پروگرام کے لیے اگر کسی طاقت پر آنکھ بند کر کے بھروسہ کر سکتا ہے تو وہ صرف چین ہے۔	real
740	فن یہ ہی ہے کہ غلیظ زبان استعمال کیے بغیر اپنے مخالف کو نفسیاتی دباؤ میں کیسے لایا جا سکتا ہے۔ اگر کوئی یہ فن نہیں سیکھ سکتا تو اسے گالی کے بہانے ننگی گفتگو کرنے کا بالکل حق حاصل نہیں ہونا چاہیے۔ پڑھیے آمنہ مفتی کا کالم۔	real
741	سابق انڈین سفارتکار اروندھتی گھوش کے مطابق اگر بحری جہاز انٹرپرائز بغیر رکے چلتا تو وہ 16 دسمبر 1971 کی صبح مشرقی پاکستان کے ساحل پر پہنچ سکتا تھا لیکن اس سے ایک روز قبل پاکستانی فوجی سربراہ جنرل نیازی نے جنرل مانیکشا کو یہ پیغام بھیجا تھا کہ وہ جنگ بندی چاہتے ہیں۔	real
742	پیروڈی اور طنز و مزاح پر مبنی جریدے ’دی ڈیپنڈنٹ‘ کے ایڈیٹر عمر عزیز خان کا کہنا ہے کہ تنقید برداشت کرنے کے لیے تمام ہی حکومتوں کے ’دل چھوٹے‘ ہوتے ہیں لیکن موجودہ حکومت تو حس مزاح سے یکسر عاری ہے۔	real
743	حمزہ فرخ جدید ٹیکنالوجی کے ذریعے پاکستان کے صوبہ پنجاب اور بلوچستان میں مجموعی طور پر سولہ جبکہ مغربی سوڈان میں بھی صاف پانی فراہم کرنے کے پراجیکٹ کامیابی سے چلا رہے ہیں۔	real
744	پاکستانی وزیر خارجہ شاہ محمود قریشی نے جو متحدہ عرب امارات کے دورے پر ہیں کہا ہے کہ انڈیا پاکستان کے خلاف 'سرجیکل سٹرائیک' کی منصوبہ بندی کررہا ہے۔ ان کا کہنا تھا کہ انڈیا ایسا اپنے داخلی حالات اور انڈیا کے زیر انتظام کشمیر کی صورت حال سے توجہ ہٹانے کے لیے کر رہا ہے۔	real
745	کیویز ہوں، پروٹیز ہوں کہ کینگروز ہوں، ان کنڈیشنز میں پاکستان کے دورے عموماً ایسے ہی شروع ہوا کرتے ہیں جیسے آج ایڈن پارک میں یہ دورہ شروع ہوا۔ ٹور کے پہلے میچ میں جس قدر ڈرامے کی توقع تھی، ہمیں اس سے کہیں زیادہ دیکھنے کو ملا۔	real
746	پچھلے سال کی ہی بات ہے کہ سعودی شہزادے محمد بن سلمان نے وزیرِ اعظم عمران خان کے کہنے پر تقریباً 2107 پاکستانی قیدیوں کو رہا کرنے کا وعدہ کیا تھا تاہم اب تک ان میں سے نصف تعداد بھی پاکستان واپس نہیں پہنچ پائے۔	real
747	مدرسے میں ساتھی طالبعلم جبکہ مسجد میں نمازی رانی خان کو عجیب نگاہوں سے دیکھتے تھے اور پھر انھوں نے اپنا دینی مدرسہ قائم کرنے کی ٹھانی جہاں اب بہت سے خواجہ سرا زیر تعلیم ہیں۔	real
748	بلوچستان ہائیکورٹ کے چیف جسٹس جمال خان مندوخیل کی سربراہی میں ہائیکورٹ کے پانچ رکنی لارجر بینچ نے 30 نومبر کو ان درخواستوں کی سماعت شروع کی تھی اور فریقین کے دلائل مکمل ہونے پر 16 دسمبر کو اس پر فیصلہ سنا دیا۔ 22 صفحات پر مشتمل تفصیلی فیصلے میں عدالت نے قرار دیا کہ ڈی ایچ اے کوئٹہ ایکٹ 2015ء کے تحت ڈی ایچ اے کو اراضی حاصل کرنے کا جو اختیار دیا گیا ہے وہ غیر آئینی ہے۔	real
749	جاتی امرا میں پریس کانفرنس سے خطاب کرتے ہوئے مریم نواز کا کہنا تھا کہ کل پرسوں سے سینٹ کے انتخاب سے متعلق جو اعلانات ہو رہے ہیں اور خوف کا مظاہرہ کیا جا رہا ہے، جب کوئی نااہل، نالائق اور ناکام حکومت عوامی گھیرے میں آ جاتی ہے تو وہ اس طرح کے ہتھکنڈوں پر اتر آ تی ہے۔	real
750	افغان امور پر نظر رکھنے والے صحافی اور طالبان اور افغانستان پر متعدد کتابوں کے مصنف احمد رشید کے مطابق افغان عوام ابھی تک یہ سوچتے ہیں کہ پاکستان طالبان کو چابی دے کر چلا رہا ہے جو کہ ان کے خیال میں یہ ایک غلط فہمی ہے۔	real
751	فاسٹ بولر محمد عامر نے واضح کیا ہے کہ وہ پاکستان کے لیے مزید انٹرنیشنل کرکٹ کھیلنے کی خواہش نہیں رکھتے لہذا آئندہ کسی بھی انٹرنیشنل میچ کے لیے ان کے نام پر غور نہ کیا جائے۔	real
752	پاکستانی معاشرے کے لیے انتہائی بولڈ اور متنازغ موضوع پر مبنی کہانی کی وجہ سے ڈرامہ 'جلن' سوشل میڈیا پر مسلسل زیر بحث رہا اور اب اس کا اختتام کسی کے لیے المیہ ہے تو کوئی بالکل خوش نہیں۔	real
753	فوجی آپریشن کے بعد پاکستان کے بڑے اخبارات کو گذشتہ شب سرکاری خبر رساں ایجنسی نے جو خبر فراہم کی اس میں درج تھا کہ جب قلعہ میری کا گھیراؤ کیا تو اس کے محافظوں نے ان پر فائرنگ کر دی۔ کیا یہ دعویٰ درست تھا؟	real
754	ایف آئی اے نے علی ظفر کی جانب سے دائر کیے گئے ہتکِ عزت کے دعوے پر تحقیقات کرنے کے بعد چالان استغاثہ کو جمع کروا دیا ہے جس میں میشا شفیع کے الزامات کو جھوٹا قرار دیا گیا ہے۔	real
755	پی آئی اے کے سی ای او ایئر مارشل ارشد ملک کا کہنا ہے کہ اس سکیم کا آئیڈیا پہلی بار 2018 میں حکومت کو پیش کیا گیا تھا جس کے بعد تمام متعلقہ اداروں سے منظوری کے بعد اب اس سکیم کو ملازمین کو متعارف کرایا گیا ہے۔	real
756	اداکارہ فردوس عرصہ دراز سے گوشہ گمنامی میں تھیں۔ چند روز قبل ان کی وفات کی خبر گردش کرنے لگی تھی مگر پھر اطلاع آئی کہ وہ برین ہیمرج کی وجہ سے ہسپتال میں داخل ہیں۔ مگر آج وہ اس دنیا سے رخصت ہوگئیں۔	real
757	شبانہ رحمان گذشتہ 20 برس سے نرسنگ کے شعبہ سے وابستہ ہیں مگر 16 دسمبر کو آرمی پبلک سکول حملے میں زخمی ہونے والے بچوں کا علاج کرتے ہوئے جو کچھ انھوں نے دیکھا وہ اُن کے ذہن پر نقش ہو کر رہ گئے ہیں جو اکثر انھیں پریشان کر دیتے ہیں۔	real
758	وزیر اعظم اندرا گاندھی اس وقت کلکتہ کے دورے پر تھیں اور راج بھون میں ٹھہری ہوئی تھیں۔ انڈین فوج کو اس خبر پر بالکل بھی تشویش نہیں ہوئی تھی کہ پاکستان نے انڈیا پر فضائی حملے کیے ہیں بلکہ درحقیقت وہ اسی نوعیت کی کسی خبر کا بےصبری سے انتظار کر رہے تھے۔	real
759	لانگ مارچ سے حکومت جائے یا نہ جائے مگر وسطی پنجاب میں اینٹی اسٹیبلیشمنٹ بیانیہ خطرے کی گھنٹی ضرور بجا رہا ہے۔ ایسے میں کیا لاہور کے ’ناکام‘ جلسے پر حکومت کو ’چِل‘ کرنا چاہیے؟	real
760	آصف انعام کا کہنا ہے اگر صرف پاور لومز کی بات ہی کی جائے تو 10 سے 20 لاکھ پاور لومز جو بند پڑی ہوئیں تھی وہ دوبارہ فعال ہو چکی ہیں اور صرف پاور لومز ہی لاکھوں لوگوں کو روزگار فراہم کر رہی ہیں۔	real
761	پاکستان اور انگلینڈ کے درمیان لاہور میں ٹیسٹ میچ کے 43 سال گزرجانے کے بعد مدثر نذر نے بی بی سی اردو سے اس ٹیسٹ اور اس وقت کے حالات سے متعلق اپنی کچھ یاداشتیں شئیر کی ہیں۔	real
762	لاہور میں پی ڈی ایم کے جلسے کے دوران محمود خان اچکزئی نے اپنی تقریر میں کہا تھا کہ لاہوریوں نے ’افغان پشتون وطن‘ پر قبضے کی کوششوں میں انگریزوں کا ساتھ دیا تھا جس کے بعد انھیں تنقید کا سامنا کرنا پڑ رہا ہے۔ ہم نے جاننے کی کوشش کی ہے کہ محمود اچکزئی کی اس بات کی تاریخی حقیقت کیا ہے؟	real
763	حزب اختلاف کے اتحاد پی ڈی ایم کے صدر مولانا فضل الرحمان نے حکومت سے مطالبہ کیا ہے کہ وہ 31 جنوری تک مستعفی ہو جائے اور اگر حکومت مستعفی نہیں ہوتی تو یکم فروری کو پی ڈی ایم کے سربراہی اجلاس میں اسلام آباد کی طرف مارچ کی تاریخ کا اعلان کیا جائے گا۔	real
764	طورخم بارڈر پر ملنے والے دو ریچھ کے بچوں کو پشاور کے چڑیا گھر میں رکھا گیا ہے جہاں وہ بظاہر بہت زیادہ خوفزدہ نظر آتے ہیں۔	real
765	گذشتہ روز لاہور میں پاکستان کی سیاسی جماعتوں کے حکومت مخالف اتحاد پاکستان ڈیموکریٹک موومنٹ کا جلسہ کامیاب رہا یا ناکام، اس کا انحصار اس پر ہے کہ آپ نے جلسے کی کوریج کہاں دیکھی۔	real
766	پشاور کے لیڈی ریڈنگ ہسپتال کے بورڈ پر آج بھی ایلس آئزکس کا نام سر فہرست ہے۔ انھوں نے پشاور دورے پر محسوس کیا تھا کہ یہاں لوگوں کے علاج معالجے کی کوئی خاص سہولیات دستیاب نہیں ہیں۔	real
767	جب کل پاکستان کرکٹ بورڈ نے کل پریس ریلیز جاری کی کہ بابر اعظم کا انگوٹھا بھی زخمی ہو گیا ہے تو ہمیں ماضی کے کئی ایسے انگوٹھے اور انگلیاں یاد آ گئے۔	real
768	سابق وزیر اعظم نواز شریف نے پی ڈی ایم کے لاہور جلسے سے خطاب میں کہا ہے کہ پارلیمان میں ان کی جماعت کے اراکین نے اسلام آباد مارچ سے قبل ’خود اپنے استعفے دینا شروع کر دیے ہیں۔‘	real
769	کیا وجہ بنی کہ آغا خان سوم نے اپنے پوتے کریم کو اپنے دونوں بیٹوں پر فوقیت دی؟ یہ جاننے کے لیے ضروری ہے کہ پہلے ہم آغا خان خاندان کی تاریخ سے واقف ہو جائیں۔	real
770	پاکستانی جیلوں میں گنجائش سے 134 فیصد زیادہ قیدی موجود ہے اور سینکڑوں قیدی کورونا سے متاثر بھی ہو چکے ہیں جبکہ دوسری جانب صحت اور دیگر سہولیات کا فقدان ہے۔ حالیہ رپورٹ کے مطابق اگر مناسب اقدامات نہ کیے گئے تو جیلوں سے پھیلنے والی وبا ملک کے بیشتر حصوں میں پھیل سکتی ہے۔	real
771	معروف ہالی ووڈ اداکارہ انجلینا جولی سنہ 2004 میں اقوام متحدہ کے ایک خیر سگالی مشن پر پاکستان آئیں تو یہ چٹان ان کی توجہ کا مرکز بنی اور انھوں نے ہی اسے ’پرنسز آف ہوپ‘ یا امید کی شہزادی کا نام دیا۔	real
772	کہا جا رہا ہے کہ گوادر شہر میں داخلے اور اخراج کے دو راستے ہوں گے تاکہ مشکوک افراد اور سرگرمیوں پر نگاہ رکھی جائے اور نہ صرف بندرگاہ اور وہاں پر کام کرنے والے غیرملکی کارکنوں بلکہ عام شہریوں کا بھی تحفظ ہو سکے۔	real
773	یہاں تک تو ہم مان گئے کہ حکومت روایتی انتظامی ہتھکنڈوں سے جلسے کو ناکام بنانے کی کوشش کر رہی ہے لیکن جب ’بٹ کڑاہی‘ لکشمی چوک والوں پر مقدمہ بننے کی خبر آئی تو روکتے روکتے بھی ’ہاسا‘ ہی نکل گیا۔ پڑھیے آمنہ مفتی کا کالم	real
774	حکومت کی طرف سے تو اجازت نہیں دی گئی تھی تاہم پاکستان میں حزبِ اختلاف کی جماعتوں کے کارکنان سنیچر کی شام ہی سے صوبہ پنجاب کے داراحکومت لاہور کے مرکز میں واقع مینار پاکستان کے گرد جمع ہونا شروع ہو گئے اور جلسے کی تیاریاں شروع کر دی گئیں۔	real
775	انڈیا نے جنوبی افریقہ کے ساتھ مل کر ورلڈ ٹریڈ آرگنائزیشن میں ویکسین کے استحقاق سے متعلق قوانین میں عارضی تبدیلیوں کے لیے ایک درخواست دی ہے جو اگر منظور ہو گئی تو کووڈ کی ویکسین کی قیمت میں کمی ممکن ہو گی۔ پاکستان نے بھی اس درخواست کی حمایت کی ہے۔	real
776	ایک حالیہ تحقیق میں بتایا گیا ہے کہ ناپید ہو جانے والی وادی سندھ کی تہذیب کے لوگ بڑے پیمانے پر گوشت خور تھے۔ وہ گائے، بھینس، بکری اور بکرے کا گوشت کھاتے تھے۔	real
777	انڈیا کی وزارت خارجہ نے یورپی تنظیم ای یو ڈس انفو لیب کی جانب سے جاری حالیہ رپورٹ کو مسترد کر دیا ہے جس میں کہا گیا ہے کہ انڈیا نواز این جی اوز اور انڈین بیانیے کو پھیلانے کے لیے ڈس انفارمیشن کی مہم چلائی جا رہی ہے جبکہ پاکستان نے بین الاقوامی اداروں پر زور دیا ہے کہ وہ اس رپورٹ پر انڈیا کے خلاف اقدامات لے۔	real
778	دسمبر1976 کو مشہور بھولو خاندان سے تعلق رکھنے والے اکرم پہلوان جب نیشنل سٹیڈیم کراچی میں جاپانی پہلوان انتونیو انوکی سے مقابلے کے لیے رنگ میں اترے تھے تو ہزاروں کی تعداد میں وہاں موجود جذباتی شائقین کو صرف اس منظر کا شدت سے انتظار تھا کہ اکرم پہلوان ایک ہی داؤ میں اپنے جاپانی حریف کو ِچت کر دیں گے۔	real
779	حکمران اتحاد میں شامل پاکستان مسلم لیگ ق کا کہنا ہے کہ اگر شروع میں ہی حزب مخالف کی جماعتوں کو حکومت کے ’سنجیدہ حلقوں‘ کی طرف سے مذاکرات کی دعوت دی جاتی تو کبھی بھی حالات میں ’اتنی تلخی نہ آتی جتنی اس وقت ہے‘۔	real
780	وزیر اعظم عمران خان نے اپنی کابینہ میں مشیر خزانہ حفیظ شیخ کو وزیر خزانہ جبکہ شیخ رشید کو وزیر داخلہ بنانے کا اعلان کیا ہے۔ حکومت مخالف تحریک کی روشنی میں ان تبدیلیوں کو اہم سمجھا جا رہا ہے۔	real
781	شیخ رشید احمد نے اپنی یادداشتوں پر مبنی کتاب ’لال حویلی سے اقوام متحدہ تک فرزند پاکستان شیخ رشید احمد کے پچاس سال‘ میں پیپلز پارٹی کی قیادت سے تعلقات اور اختلافات کے بارے میں تفصیل سے لکھا ہے۔	real
782	حکومتی ادارے بتا رہے ہیں کہ نہ صرف کورونا کے متاثرین کی شرح میں تیزی سے اضافہ ہو رہا ہے، وائرس کی اس لہر میں زیادہ سختی نظر آ رہی تھی اور اموات بھی زیادہ ہو رہی ہیں لیکن اب لاہور میں حکومت مخالف جلسہ ہونے کو ہے تو کیا وائرس کا پھیلاؤ سیاسی کارکنان کو وہاں جانے سے روک سکتا ہے؟	real
783	پاکستانی حکام کا کہنا ہے کہ ملک میں اگلے برس کی پہلی سہ ماہی میں کورونا وائرس سے بچاؤ کی ویکسین دستیاب ہو جائے گی تاہم کس ملک کی ویکسین کا چناؤ کرنا ہے یہ فیصلہ ویکسین کی افادیت کو دیکھ کر کیا جائے گا۔	real
784	زیادہ تر پاکستانی پُرانی گاڑیاں بیچنے یا خریدنے کے لیے روایتی شو رومز کا راستہ اپناتے ہیں لیکن ملک میں رواں سال گاڑیوں کی قیمتوں میں مسلسل اضافہ دیکھا گیا ہے اور متوسط طبقے کے لیے بظاہر کوئی نئی کار خریدنے کا تصور صرف کسی اشتہار کی حد تک محدود ہوگیا ہے۔	real
785	سوشل میڈیا پر آپ کے لیے بھی کبھی نہ کبھی نفرت انگیز تبصرے کیے گئے ہوں گے اور اگر ایسا نہیں تو آپ واقعی دنیا کے خوش قسمت ترین انسان ہیں لیکن پھر بھی دوسرے لوگوں کی پوسٹس پر ایسے کمنٹس تو آپ کی نظروں سے ضرور ہی گزرے ہوں گے۔	real
786	پاکستان تحریک انصاف کی سعدیہ سہیل کہتی ہیں کہ خواتین کو ہراساں کرنے کا رجحان بہت زیادہ ہے اور جو خواتین سیاست کے لیے نکلتی ہیں ان کے بارے میں یہ سوچا جاتا ہے کہ یہ ہمارے لیے ہی باہر نکلی ہیں جو ہمارے معاشرے کی سب سے بڑی بد قسمتی ہے۔	real
787	انڈیا کے زیرانتظام کشمیر میں مقامی انتخابات کی اہم بات یہ ہے کہ پہلی مرتبہ سابق عسکریت پسند اور ان کی پاکستانی بیویاں کسی سیاسی سرگرمی میں شریک ہو رہے ہیں۔	real
788	حکومت مخالف اتحاد پی ڈی ایم کے سربراہ مولانا فضل الرحمان کا کہنا تھا کہ 31 دسمبر تک تمام پارٹیوں کے ارکان پارٹی قائدین کے پاس استعفے جمع کروا دیں گے جو لانگ مارچ کے بعد سپیکر قومی اسمبلی کو بھجوائے جائیں گے۔	real
789	وزیر اعظم عمران خان نے منگل کو صحافیوں سے ملاقات میں اپنی حکومت کی کامیابیوں اور ناکامیوں پر بھی تفصیل سے بات کی ہے۔ اپوزیشن کے بارے میں ایک سوال کے جواب میں انھوں نے کہا کہ ’کچھ ملکوں کا اتحاد پاکستان کو تگڑا نہیں دیکھنا چاہتا۔‘	real
790	پشاور کے خیبر ٹیچنگ ہسپتال میں بروقت آکسیجن نہ ملنے کے باعث چھ افراد ہلاک ہوئے ہیں اور اسی دوران بعض مریضوں کے رشتے دار اُن ڈاکٹروں کی کوششوں کی تعریف کر رہے ہیں جنھوں نے مشکل حالات میں اپنی جان کی پرواہ کیے بغیر مریضوں کی جانیں بچائیں۔	real
791	پاکستان کے وزیرِ اعظم عمران خان اپنے ٹوئٹر اکاؤنٹ پر کی جانے والی ٹویٹس کے باعث اکثر خبروں کی ذینت بنتے ہیں تاہم گذشتہ روز جب انھوں نے ان تمام افراد کو ’ان فالو‘ کر دیا جنھیں وہ فالو کیا کرتے تھے تو صارفین کے ذہن میں کئی سوالات جنم لے رہے ہیں۔	real
792	سپریم کورٹ میں جسٹس فائز عیسیٰ ریفرنس کے فیصلے کے خلاف نظرثانی کی اپیلوں کی سماعت کے دوران سرینا عیسیٰ کے ججز سے باری باری سوال اور چیف جسٹس بارے ریمارکس پر بینچ کے سربراہ جسٹس عمر عطا بندیال برہم ہو گئے اور اُنھوں نے فائز عیسیٰ کی اہلیہ کو مخاطب کرتے ہوئے کہا کہ وہ چیف جسٹس کا نام لینے میں احتیاط برتیں۔	real
793	کیا سینٹ قومی احتساب بیورو کے خلاف آزادانہ تحقیقات کا انعقاد کرا سکتا ہے؟ ڈپٹی چیئرمین سینٹ سلیم مانڈوی والا کے نیب کے احتساب کے حوالے سے بیان پر بی بی سی نے اس معاملے پر ماہرین پارلیمانی امور سے رابطہ کر کے ان کی رائے معلوم کی ہے۔	real
794	پاکستان کے زیر انتظام کشمیر سے تعلق رکھنے والی دو بہنیں لائبہ اور ثنا سنیچر کو غلطی سے لائن آف کنٹرول عبور کر گئی تھیں جس کے بعد انڈین حکام نے انھیں پاکستان کے حکام کے حوالے کر دیا ہے۔	real
795	اسلام آباد مذاکرات کو تیار نہیں اور اپوزیشن بات چیت پر رضامند نہیں ایسے میں ادارے کتنا عوامی دباؤ برداشت کر سکتے ہیں اس کا فیصلہ یہ دسمبر کرے گا لیکن دعا ہے کہ اب کی بار یہ دسمبر ستمگر نہ ہو۔	real
796	شناخت پراجیکٹ کے تحت کراچی کی سڑکوں سے ملنے والی ’لاوارث لاشوں‘ کو ان کے ورثا تک پہنچایا جاتا ہے۔ اب تک تقریباً تین ہزار لاشوں کی شاخت ممکن ہوئی ہے، لیکن اس عمل میں ناکامی کا تناسب ’30 سے 35 فیصد‘ ہے۔	real
797	وہ سفر جو کنسرٹ ہال سے شروع ہو کر مختلف موڑ مڑتا، کہیں یو ٹرن لیتا، کہیں رکتا، پلٹتا، بالآخر سات دسمبر کو حویلیاں کے قریب ایک پہاڑی پر ہمیشہ کے لیے انجام پذیر ہو گیا۔	real
798	نیت صادق ہو مگر زاویہِ نظر دھندلا یا بھینگا ہو تو آپ خود کو اور دوسروں کو کنفیوژ کر کے فکری و عملی الجھاوا تو بڑھا سکتے ہیں مگر منزل حاصل کر سکتے ہیں کہ نہیں، یہ ایک الگ بحث ہے۔	real
799	ماہرین کے مطابق وادی کاغان اور دریائے کنہار میں ٹراؤٹ مچھلی کی قلت ’ماحولیات کی تباہی‘ کی نشاندہی کرتی ہے۔ لیکن اب کچھ اقدامات سے اس نقصان کو کم کرنے کی کوشش کی جا رہی ہے۔	real
800	ابھی کچھ روز پہلے کی بات سنیے۔ ہمارے وزیراعظم صاحب نے فرمایا کہ ایلف شفق صاحبہ کا ناول'چالیس چراغ عشق کے' پڑھیے۔ اس میں ہنسنے کی کیا بات تھی؟ کیا آپ نے تاریخ میں کوئی ایسا وزیر اعظم دیکھا جو فرصت کے اوقات میں پڑھنے کے لیے کتابیں بھی بتاتا ہو؟ نہیں دیکھا نا۔ یہ جو منہ پھاڑ پھاڑ کے ہنس رہے ہیں انھوں نے بھی نہیں دیکھا۔	real
801	جسٹس قاضی فائز عیسیٰ کی نظرثانی اپیل میں صدارتی ریفرنس کے حوالے سے سابق چیف جسٹس آصف سعید کھوسہ اور سپریم جوڈیشل کونسل کے کنڈکٹ کو ’بدنیتی پر مبنی‘ اور ’غیر شفاف‘ قرار دیا گیا ہے۔	real
802	مشرقی پاکستان میں شکست پاکستانی فوج کو بیک فٹ پر لے آئی تھی اور ذوالفقار علی بھٹو نے اس کا بھر پور فائدہ اٹھایا لیکن کچھ ہی دنوں میں جنرل گل حسن بھی ان کے دل سے اتر گئے اور انھیں ایک ایسے چیف کی ضرورت پڑ گئی جو آنکھیں موند کر ان کے ہر حکم کو بجا لائے۔	real
803	کیوی کرکٹ بورڈ اس وقت ایسی پوزیشن میں نہیں کہ دورے کو منسوخ کرنے کا سوچ بھی سکے۔ لیکن دونوں کرکٹ بورڈز کو اپنے حفاظتی اقدامات پہ نظرِ ثانی کرنے کی شدید ضرورت ہے۔ محض کھلاڑیوں کو موردِ الزام ٹھہرانا زیادتی ہے۔	real
804	ڈرامہ ’گھسی پٹی محبت‘ میں اپنے منفرد کردار کے بارے میں بات کرتے ہوئے اداکارہ رمشا خان نے بتایا کہ اس قسم کا کردار انھوں نے پہلے کبھی ادا نہیں کیا اس لیے انھیں یہ مضبوط کردار بہت اچھا لگ رہا ہے اور ایسا کردار نبھانے پر انھیں خود پر فخر ہے۔	real
805	شہباز احمد واحد ہاکی کے کھلاڑی ہیں جنھیں حکومتِ پاکستان نے ہلال امتیاز کے ایوارڈ سے نوازا ہے۔ پاکستان میں یہ ایوارڈ صرف چار کھلاڑیوں کو ملا ہے جن میں شہباز احمد کے علاوہ عمران خان، جہانگیر خان اور جان شیر خان شامل ہیں۔	real
806	جوڈیشل کمیشن آف پاکستان نے اسلام آباد ہائی کورٹ میں دو ایڈشنل ججز بابر ستار اور طارق محمود جہانگیری کی تعیناتی کی سفارش کی ہے۔	real
807	تجزیہ کار ضیاالدین کا کہنا ہے کہ عمران خان پہلی مرتبہ حکومت میں آئے ہیں اور ان کے ساتھ کام کرنے والوں کا تجربہ بھی بہت محدود ہے اس لیے اپنی حکومت کی ترجمانی کرتے ہوئے وہ کبھی کبھی بہت غیر ذمہ دار ہو جاتے ہیں۔	real
808	زہر خورنی کا علاج کروانے کے غرض سے انڈیا جانے والے انسانی حقوق کے کارکن ذوالفقار شاہ تقریباً سات برس وہیں پھنس گئے۔ تاہم جب آخر کار انڈین سرکار نے انھیں اپنے وطن واپس لوٹنے کی اجازت دے دی تو وہ پاکستان آمد پر واہگہ بارڈر سے ’لاپتہ‘ ہوگئے۔	real
809	وہ کونسی قانونی خامیاں ہیں جن کی وجہ سے ایک کم عمر بچی کو مبینہ طور پر ریپ کا نشانہ بنانے والا ملزم اسی لڑکی سے شادی کر کے قانون کے شکنجے سے بچ نکلا؟	real
810	اسلام آباد ہائی کورٹ نے سابق وزیر اعظم میاں نواز شریف کو العزیزیہ سٹیل ملز اور ایون فیلڈ ریفرنس کی اپیلوں میں عدم پیشی کی بنا پر اشتہاری قرار دیتے ہوئے ضمانتی مچلکے بحق سرکار ضبط کرنے کی کارروائی شروع کرنے کا حکم دیا ہے لیکن کیا اس فیصلے سے انھیں وطن واپس لانے میں کوئی مدد ہو گی؟	real
811	فضل محمود جنھوں نے کراچی کے اس غیر سرکاری ٹیسٹ میں ایم سی سی کی پہلی اننگز میں شاندار بولنگ کرتے ہوئے چھ وکٹیں حاصل کی تھیں، میچ کے بعد فرنٹیئر میل میں سوار ہوئے اور راولپنڈی روانہ ہوگئے جہاں پولیس کی ملازمت کے دوران ان کی پوسٹنگ ہوئے زیادہ وقت نہیں گزرا تھا۔	real
812	سابق ڈی جی آئی ایس آئی اسد درانی کا کہنا ہے کہ عمران خان کا سب سے بڑا مسئلہ ان کے بارے میں یہ تاثر قائم ہونا ہے کہ یہ خود نہیں آئے بلکہ خاکی بوجھ لے کر آئے ہیں، کچھ لوگ تاریخ سے نہیں سیکھتے کیونکہ وہ کہتے ہیں کہ ہم اپنی تاریخ بنائیں گے۔	real
813	پاکستان مسلم لیگ نواز کے رہنما اور سابق وزیر خزانہ اسحاق ڈار کا کہنا ہے کہ فوج کا بطور ادارہ نہیں بلکہ کچھ افراد کی بات کرنی ہو گی، ہیلری کلنٹن بھی ڈیپ سٹیٹ سے متعلق پاکستان کی مثال دے چکی ہیں۔	real
814	جب ہم نے اسلام آباد کے علاقے جی 10 فور کی مارکیٹ میں موجود دکانداروں اور راہگیروں سے کورونا وائرس روکنے کے لیے کیے گئے 'سمارٹ لاک ڈاؤن' اور 'ایس او پیز' پر بات کی تو زیادہ تر لوگوں نے بات ہنسی میں اُڑا دی یا طنزیہ جواب دیے۔	real
815	ہو سکتا ہے کہ یہ سوچ حاوی ہو کہ لگتے رہیں نعرے، ہوتے رہیں جلسے، چلتی رہے تحریک اور بڑھتے رہیں لانگ مارچ، ہمیں اس سے کوئی فرق نہیں پڑتا۔ کیونکہ ہاتھی کے پاؤں میں سب کا پاؤں۔ اپوزیشن حکومت کا کیا بگاڑ لے گی؟ پڑھیے عاصمہ شیرازی کا کالم	real
816	پاکستان خوردنی تیل درآمد کرنے والا دنیا کا چھٹا بڑا ملک ہے مگر گذشتہ چند برسوں سے اب پاکستان میں سینکڑوں کسان زیتون کی کاشت کر رہے ہیں۔ آئیے آپ کی ملاقات ایسے ہی چند کسانوں سے کراتے ہیں جو اس وقت زیتون کی مختلف اقسام کی نہ صرف کاشتکاری کرتے ہیں بلکہ وہ مارکیٹ میں اس کا تیل بھی فروخت کر رہے ہیں۔	real
817	او آئی سی کے اعلامیہ میں دیگر امور کے علاوہ انڈیا کے زیر انتظام کشمیر کے تنازع پر پاکستان کے موقف کو اپنایا گیا ہے۔ اس طرح اب یہ مسئلہ پھر سے سفارتی سطح پر عالم اسلام کا ایک مسئلہ سمجھا جا سکے گا۔	real
818	پاکستان میں کسمپرسی کی زندگی سے نجات پانے کے بعد وہ معمول سے زیادہ وزنی ہاتھی جسے دنیا کا تنہا ترین ہاتھی کا نام دیا گیا، اپنے نئے گھر کمبوڈیا پہنچ گیا ہے۔	real
819	ملتان کے گھنٹہ گھر چوک میں حکومت مخالف اتحاد پاکستان ڈیمو کریٹک موومنٹ نے سیاسی قوت کا مظاہرہ کیا جہاں پیپلز پارٹی کے شریک چیئرمین بلاول بھٹو زرداری کی ہمشیرہ آصفہ بھٹو زرداری نے اپنے خطاب میں کہا کہ اب سیلیکٹڈ حکومت کو جانا ہو گا جبکہ مسلم لیگ نواز کی رہنما مریم نواز نے کہا کہ عوام اب عمران خان کا لاک ڈاؤن کرنے والے ہیں۔	real
820	سابق وزیر اعظم پاکستان چوہدری محمد علی کے مطابق قبائلی لشکر غیر منظم اور غیر پیشہ ورانہ انداز میں آگے بڑھ رہا تھا، وہ لکھتے ہیں کہ ’قبائلی اگر منظم ہوتے اور مال غنیمت جمع نہ کرنے لگ جاتے تو 26 اکتوبر کو سری نگر ان کے قبضے میں ہوتا۔‘	real
821	آصفہ بھٹو زرداری اپنی بڑی بہن بختاور کے برعکس سیاسی معاملات پر زیادہ کھل کر بات کرتی ہیں اور اکثر انھیں بلاول کے بعد کی قیادت کے لیے موزوں سمجھا جاتا ہے لیکن اس میں مشکلات کیا ہوں گی؟	real
822	پاکستان میں بہت سے لوگ صرف اس وجہ سے کورونا ویکسین ٹرائل کا حصہ نہیں بن رہے کیونکہ ان کے ذہنوں میں اس ٹرائل کے دوران ’جنسی تعلق قائم نہ کرنے‘ سے متعلقہ شرط کے حوالے سے شکوک و شبہات پائے جاتے ہیں۔	real
823	جس طرح کے رکھوالے کاون نے پچھلے پینتیس برس میں دیکھے وہ ہم عشروں سے بھگتتے آ رہے ہیں۔ فرق ہے تو بس اتنا کہ تمھارا پنجرہ چھوٹا ہے اور ہمارا پنجرہ کچھ بڑا۔ وسعت اللہ خان کا کالم۔	real
824	بلوچستان یونیورسٹی کے تین اساتذہ کو کوئٹہ سے خضدار جاتے ہوئے مبینہ طور پر اغوا کیا گیا تھا۔ دو کی بازیابی کے بعد ان میں سے ایک پروفیسر لیاقت سنی تاحال لاپتہ ہیں۔	real
825	سری لنکا میں پیدا ہونے والا کاون 1985 میں پاکستانی حکومت کو تحفے میں دیا گیا تھا اور برسوں خراب حالات میں رکھے جانے کے بعد آج اسے عدالتی حکم پر رہا کیا جا رہا ہے۔	real
826	موجودہ حکومت نے جب پی ٹی وی کی بہتری کا بیڑہ اٹھایا تو پھر ایک میٹنگ ہوئی جس میں چئیرمین پی ٹی وی کی جگہ وزیر اعظم عمران خان تھے جس سے ظاہر ہورہا تھا کہ وہ پچھلی تمام حکومتوں کی نسبت پی ٹی وی کے بھلے کے لیے زیادہ فکرمند ہیں۔	real
827	نجی ٹی وی کو انٹرویو دیتے ہوئے پاکستان کے وزیراعظم عمران خان کا کہنا ہے کہ ان پر ڈھائی سال کے دورے حکومت میں کبھی بھی فوج کی جانب سے کوئی دباؤ نہیں ڈالا گیا اور ایک بھی ایسی چیز نہیں ہے کہ جو وہ کرنا چاہیں اور فوج اس سے منع کرے۔	real
828	پاکستان کے صوبہ پنجاب کے شہر لاہور میں سماجی کارکن عمار علی جان کو طلبہ یکجہتی مارچ کے بعد گرفتار کرنے کی کوشش کی گئی تاہم وہ اور ان کے دیگر ساتھی مزاحمت کے بعد اس سے بچ نکلنے میں کامیاب ہو گئے۔	real
829	سکاٹ لینڈ سے ماہواری سے متعلق مصنوعات کو مفت کیے جانے کی خبر آنے کے بعد پاکستان میں بھی ردعمل آنا شروع ہوا۔ سوشل میڈیا پر لگ بھگ تمام صارفین نے اس پیش رفت کا خیر مقدم کیا اور پاکستان میں بھی اسی طرح کے اقدامات، خاص طور پر ان مصنوعات پر لگے ٹیکس کو ختم کرنے کے بارے میں بات کی۔	real
830	گلگت بلتستان کی حکومت نے وادی ہنزہ سے تعلق رکھنے والے عوامی ورکرز پارٹی کے رہنما بابا جان سمیت ان کے دیگر ساتھیوں کی سزائیں معطل کرتے ہوئے انھیں نو برس بعد رہا کر دیا ہے۔	real
831	میڈیکل کالجوں میں داخلے کے خواہش مند برض طلبا نے داخلہ ٹیسٹ کی تاریخ بار بار بدلے جانے کی وجہ سے مایوس ہو کر نہ صرف اپنی کتابیں بیچ دیں بلکہ انھوں نے داخلہ ٹیسٹ کی تیاری کے لیے جو نوٹس بنائے تھے وہ ان کو بھی فروحت کرنے کے خواہش مند ہیں۔	real
832	بختاور بھٹو کی منگنی سے پہلے پاکستان کے سوشل میڈیا پر افواہیں گردش کرتی رہیں کہ شادی کی تقریبات میں وہ اپنی مرحوم والدہ کے نکاح کا لباس زیب تن کریں گی۔	real
833	لال محمد کو کبوتر پالنے کا شوق تو بچپن سے تھا لیکن اُن کی چھت پر کوئی لکی کبوتر اترے گا اور وہ اس کے باعث دیوار چین پہنچ جائیں گے، یہ ان کے وہم و گمان میں بھی نہیں تھا۔	real
834	حکومتی وزرا اس سے پہلے الزام عائد کرتے رہے ہیں کہ پی ڈی ایم کے جلسے ملک میں کورونا پھیلانے کا باعث بن رہے ہیں۔	real
835	ایک وقت تھا کہ اپنی جاذب نظر شخصیت اور سلجھی ہوئی بات چیت کے باعث نعیم بخاری ناصرف مردوں بلکہ عورتوں میں بھی یکساں مقبول تھے مگر پھر انھوں نے خواتین سے متعلق چند ایسے جملے کسے جنھیں ناگواری نظروں سے دیکھا گیا۔	real
836	سرکاری کورونا لیب میں کنٹریکٹ پر کام کرنے والے ایک شخص کا کہنا ہے کہ ’میری اہلیہ حاملہ ہیں اور میری جیب میں اس وقت صرف نو ہزار روپے بچے ہیں۔‘	real
837	نیوزی لینڈ کا دورہ کرنے والی پاکستانی کرکٹ ٹیم کے چھ ارکان کے کورونا ٹیسٹ مثبت آنے کے بعد پاکستانی کھلاڑیوں پر کووڈ-19 کے پروٹوکول کی خلاف ورزی کرنے کے الزامات عائد کیے جا رہے ہیں۔	real
838	سنہ 2008 میں ہونے والی ممبئی حملوں میں نو حملہ آوروں سمیت 174 افراد ہلاک جبکہ درجنوں زخمی ہوئے تھے۔ ایف آئی اے کی ریڈ بک میں شامل حملوں کے 19 ملزمان تاحال مفرور ہیں اور پاکستان کے تفتیش کار یا ادارے انھیں ایک بار بھی پکڑنے سے قاصر رہے ہیں۔	real
839	آج سے ٹھیک 53 برس قبل نواب آف کالا باغ ملک امیر محمد خان کو مبینہ طور پر ان کے بیٹے نے گولیاں مار کر قتل کر دیا تھا۔ اپنے عروج کے وقت امیر خان سیاہ و سفید کے مالک تھے مگر ان کے بعد ان کے خاندان کی گرفت سیاست پر کمزور پڑ گئی۔	real
840	محسن داوڑ کے مطابق پاکستان ڈیموکریٹک موومنٹ میں شامل چند سیاسی جماعتوں کو ان کی شرکت پر اعتراض تھا اسی لیے وہ آئندہ اس موومنٹ کے کسی بھی جلسے میں شریک نہیں ہوں گے۔	real
841	ورلڈ اکنامک فورم میں آج پاکستان کے بارے میں اسٹرٹیجک ڈائیلاگ کا انعقاد ہو رہا ہے جس کے دوران پاکستان کو بہترین اقتصادی مواقع حاصل کرنے کا موقع ملے گا لیکن سوشل میڈیا صارفین کے مطابق اقوامِ عالم پہلے سے پاکستانی صلاحتیوں کے معترف ہو چکے ہیں۔	real
842	گذشتہ روز وفاقی کابینہ نے ریپ کے مجرموں کی جنسی صلاحیت ختم کرنے جیسی سزاؤں کی اصولی منظوری دے دی۔ اس فیصلے پر بی بی سی نے ریپ کا شکار ہونے والی لڑکیوں، ان کے اہل خانہ، سماجی کارکنان اور قانونی ماہرین سے بات کر کے یہ جاننے کی کوشش کی ہے کہ کیا ایسی سزاؤں سے ریپ مقدمات میں کمی لائی جا سکتی ہے۔	real
843	اداکارہ ارمینا خان کا کہنا ہے کہ پاکستان میں فلم سے بڑا میڈیم ٹی وی ہے جس سے دور رہنا اپنے مداحوں اور کیریئر دونوں کے ساتھ ناانصافی کرنے کے مترادف ہے، میری کوشش تھی کہ خواتین کے حقوق پر کوئی ڈرامہ کروں لیکن ہمارے ہاں ایسی سکرپٹس نہیں ہوتیں اور اگر ہوتی ہیں تو اس کے لیے اداکاراؤں میں مقابلہ بہت سخت ہوتا ہے۔	real
844	پاکستان میں اگرچہ زچگی کے لیے نجی اور سرکاری ہسپتالوں میں حاملہ خواتین کی رجسٹریشن پہلے سے کی جاتی ہے لیکن دونوں ہی جگہوں پر ایمرجنسی یا عام حالات میں بھی بچے کی پیدائش مفت نہیں ہوتی۔ ہم نے یہی جاننے کی کوشش کی کہ ایک زچگی پر کتنا خرچ آتا ہے۔	real
845	آئی ایم ایف کی جانب سے اس پروگرام کے دوبارہ شروع کرنے سے متعلق کچھ شرائط ہیں جن میں سب سے نمایاں پاکستان میں بجلی کے نرخوں میں اضافہ اور اضافی ٹیکس کی وصولی شامل ہیں۔	real
846	اسرائیلی اخبار کیوں لکھ رہے ہیں کہ پاکستان کی طاقتور اسٹیبلشمنٹ اسرائیل سے روابط رکھنے میں کوئی حرج نہیں رکھتی، ہم اس بارے میں کوئی بات لکھنے اور بولنے کو تیار نہیں، پڑھیے عاصمہ شیرازی کا کالم۔	real
847	اسرائیلی وزیر اعظم بنیامن نیتن یاہو اور سعودی ولی عہد شہزادہ محمد بن سلمان کی مبینہ ملاقات کی خبریں پاکستانی سوشل میڈیا پر گرما گرم بحث کا محور بنی ہوئی ہیں۔	real
848	انتظامیہ کے مطابق ہنگامہ آرائی اپوزیشن پارٹیوں کے احتجاج کے دوران شروع ہوئی، جس میں سرکاری املاک کو بھی نقصان پہنچایا گیا ہے۔ اپوزیشن جماعتوں نے توڑ پھوڑ اور ہنگامہ آرائی کے الزامات کی تردید کی ہے۔ انتظامیہ کا کہنا ہے کہ اس ہنگامہ آرائی کے ذمہ اداروں کی شناخت کا عمل جاری ہے، جس کے بعد گرفتاریاں بھی عمل میں لائی جائیں گی۔	real
849	پاکستانی فوج کی خفیہ ایجنسی ملٹری انٹیلیجنس کی تحویل میں موجود ادریس خٹک کی 21 سالہ بیٹی تالیہ خٹک نے اپنے والد کے ساتھ ایک سال بعد ہونے والی ملاقات کی تفصیلات بیان کی ہیں۔ ’ہم نے اپنے والد کے ساتھ ہمیشہ پشتو میں بات کی ہے لیکن اس ملاقات میں شرط تھی کہ پشتو زبان میں بات نہیں کی جا سکتی۔‘	real
850	پاکستان کرکٹ ٹیم کی اگلی منزل اب نیوزی لینڈ ہے جہاں وہ ایک ایسی ٹیم سے مدِمقابل ہو گی جو ٹیسٹ فارمیٹ میں ہوم گراؤنڈ پر سنہ 2016 سے ناقابل شکست رہی ہے۔ موسمی حالات کے علاوہ گراونڈ کنڈیشنز بھی پاکستانی ٹیم کے لیے ایک امتحان ہوں گی۔	real
851	این سی او سی کے مطابق گذشتہ ایک ہفتے کے دوران تعلیمی اداروں میں وائرس کا پھیلاؤ بڑھا ہے جبکہ والدین کو خدشہ ہے کہ پہلے ہی پڑھائی کا اتنا حرج ہو چکا ہے کہ بچوں کا تعلیمی سال ضائع ہوسکتا ہے۔ حکومت نے اعلان کیا ہے کہ 26 نومبر سے 10 جنوری تک ملک میں تمام تعلیمی ادارے طلبہ کے لیے بند رہیں گے۔	real
852	پاکستان میں اعلیٰ تعلیم ہر گزرتے سال کے ساتھ مہنگی ہوتی جا رہی ہے اور ملک میں بیروزگاری ایک بڑا مسئلہ خیال کیا جاتا ہے۔ ایسے میں کئی لوگ، بذریعہ انٹرنیٹ یا شارٹ کورسز، ہنر سیکھ کر پیسے کمانے کے ’ڈیجیٹل راستے‘ ڈھونڈ رہے ہیں۔	real
853	پاکستانی اداکارہ مدیحہ امام کہتی ہیں کہ اس قسم کے مسائل سے صرف لڑکیاں ہی دو چار نہیں بلکہ لڑکوں کو بھی یہی احساس دلایا جاتا ہے کہ اگر کوئی لڑکی 'تم سے زیادہ عقلمند یا پڑھی لکھی ہے تو اس کا اور تمہارا جوڑ نہیں ہے۔‘	real
854	پاکستان میں کورونا وائرس کی دوسری لہر کے باعث امکان ہے کہ حکومت جلد ہی سکولوں کو پھر سے بند کر کے چھٹیوں کا اعلان کرنے والی ہے اور ایسے میں والدین کو اپنے بچوں کا تعلیمی سال ضائع ہونے کی فکر لاحق ہے۔ کئی والدین کو یہ ڈر بھی ہے کہ بچے کہیں سکول کی عادت ہی نہ بھلا دیں۔	real
855	جن لوگوں کو محترمہ شمیم اختر سے ملاقات کے مواقع ملے، کسی محفل میں انھیں دیکھا یا کوئی گفتگو سنی، ان کا خیال ہے کہ وہ ایک سیدھی سادی، عبادت گزار گھریلو خاتون تھیں جن کا کسی سیاسی سرگرمی یا دنیا داری کے کسی معاملے سے کوئی تعلق نہیں تھا۔	real
856	سابق وزیر اعظم نواز شریف اور سابق وزیر اعلی پنجاب میاں شہباز شریف کی بہن کوثر اپنی والدہ بیگم شمیم اختر کی میت کو لے کر اگلے دو سے تین روز میں لندن سے پاکستان روانہ ہوں گی۔	real
857	فرانس کی طرف سے شدید احتجاج سامنے آنے کے بعد پاکستان کی وفاقی وزیر برائے انسانی حقوق شیریں مزاری کو فرانس کے صدر ایمانویل میکخواں کے بارے میں ٹوئٹر پر جاری کیا گیا ایک بیان حذف کرنا پڑا ہے۔	real
858	سوچئیے اگر کورونا کی وبا کے دوران عمران خان کے بجائے نواز شریف یا یوسف رضا گیلانی وزیرِ اعظم ہوتے اور کورونا سے عوام کو بچانے کے لیے تین سو افراد سے زیادہ کے اجتماع اور جلسوں پر پابندی لگا دیتے تو کیا حزبِ اختلاف پی ٹی آئی کے رہنما عمران خان عوامی مفادِ عامہ میں حکومت کے خلاف اپنی عوامی رابطہ مہم وبا کے ٹلنے تک ترک کر دیتے ؟	real
859	سابق وزیر اعظم نواز شریف اور سابق وزیر اعلی پنجاب میاں شہباز شریف کی والدہ بیگم شمیم اختر جو اتوار کے روز لندن میں انتقال کر گئی تھیں ان کی میت کو اپنے شوہر کے پہلو میں دفن کرنے کے لیے پاکستان لے جایا جائے گا۔	real
860	لطافتوں سے بھرا موسم سرما دروازے پہ دستک دے رہا ہے لیکن ساتھ ہی ساتھ کورونا کی دوسری لہر بھی سر اٹھا چکی ہے۔ کتنی ہی تقریبات، جن میں لاہور کا مشہور ’فیض فیسٹیول‘ بھی شامل ہے اس بار منعقد نہیں ہوئیں۔ پڑھیے آمنہ مفتی کا کالم۔	real
861	اس فیصلے کے تحت کراچی کے ضلع جنوبی، غربی، شرقی، وسطی اور کورنگی کے ڈپٹی کمشنرز نے مختلف علاقوں میں سمارٹ لاک ڈاؤن اور مائیکرو سمارٹ لاک ڈاؤن نافذ کرنے کا نوٹیفکیشن جاری کیا جس کا اطلاق سنیچر کی رات 12 بجے سے پانچ دسمبر تک ہو گا۔	real
862	جسٹس وقار احمد سیٹھ، جو حال ہی میں کورونا وائرس کے سبب وفات پا گئے ایک بے باک جج تھے اور ججوں کی اس قبیل سے تعلق رکھتے تھے جو پاکستان میں کمیاب ہے۔	real
863	خادم رضوی کی وفات کے بعد ان کی جماعت کی اٹھارہ رکنی شوری نے ان کے بیٹے سعد رضوی کو تحریک لبیک کا نیا سربراہ مقرر کیا جس کا اعلان جماعت کے مرکزی نائب امیر سید ظہیر الحسن شاہ نے جنازے کے موقع پر کیا۔	real
864	مذہبی و سیاسی جماعت تحریک لبیک پاکستان کے سربراہ خادم حسین رضوی کی نمازِ جنازہ سنیچر کو لاہور میں مینارِ پاکستان کے گراؤنڈ میں ادا کر دی گئی ہے۔ نمازِ جنازہ سے قبل اعلان کیا گیا کہ جماعت کی مجلس شوریٰ نے خادم رضوی کے بڑے صاحبزادے سعد حسین رضوی کو ان کا جانشین مقرر کیا ہے۔	real
865	پبلک پرائیوٹ پارٹنرشپ ماڈل ہوتا کیا ہے اور اس ماڈل کے تحت منصوبے کیسے مکمل کیے جاتے ہیں اور پھر ان کا نظم و نسق کیسے چلایا جاتا ہے اس حوالے سے بی بی سی نے اس شعبے کے ماہرین سے تفصیل سے بات کی ہے۔	real
866	ضلع ننکانہ میں مڑھ بلوچاں کے علاقے میں واقع اس گھر میں ہلاک ہونے والے 31 برس کے طاہر احمد پیشے کے لحاظ سے ڈاکٹر تھے۔ اس حملے میں ہلاک ہونے والے ڈاکٹر کے والد طارق احمد بھی زخمی ہوئے ہیں جن کی حالت تشویشناک بتائی جاتی ہے۔	real
867	ضلع کیچ کے سرکاری سکولوں کے اساتذہ کی تادم مرگ بھوک ہڑتال کے باعث حالت تشویشناک ہوئی تو محکمہ تعلیم کو اس حکم نامے کو واپس لینا پڑا جس کے تحت ان کو برطرف کیا گیا تھا۔	real
868	پاکستان میں انٹرنیٹ پر شائع ہونے والے مواد کے لیے نئے قواعد کے بارے میں ڈیجیٹل حقوق کے کارکنان نے تحفظات کا اظہار کیا ہے۔ ان کے مطابق ’ان قواعد کے تحت حکومت پر کسی بھی قسم کی تنقید چاہے وہ حقائق پر مبنی ہی کیوں نہ ہو اسے ہٹایا جا سکے گا۔ پی ٹی اے نے کہا کہ تنقید قبل از وقت ہے کیونکہ ان قواعد کا تو ابھی استعمال ہی نہیں ہوا۔	real
869	ناموس رسالت سے متعلق خادم حسین رضوی کے سخت گیر موقف اور احتجاجی دھرنے نے انھیں پاکستان اور دنیا میں تو شہرت دی لیکن جو چیز انھیں سوشل میڈیا گروپس، واٹس ایپ چیٹ اور حتی کے میمز اور ری ایکشن سٹیکرز میں ڈھال کر گھر گھر اور ہر فون تک لے گئی وہ تھی ان کے مخالفین اور ناقدین کے لیے نازیبا الفاظ اور گالیاں تھیں۔	real
870	کریش انویسٹیگیشن رپورٹ میں تین تکنیکی وجوہات کو حادثے کی وجہ قرار دیا ہے تاہم فضائی حادثوں کے ایک تفتیش کار کا کہنا ہے کہ جب بھی طیارے میں کوئی تکنیکی مسئلہ پیش آتا ہے تو اس کے پیچھے بھی انسانی غلطی ہو سکتی ہے اور اسے خارج از امکان قرار نہیں دیا جا سکتا۔	real
871	امریکی خفیہ ایجنسی سی آئی اے نے القاعدہ کے رہنما اسامہ بن لادن کے کمپیوٹر سے ملنے والی ساڑھے چار لاکھ سے زائد دستاویزات، تصاویر اور ویڈیوز جاری کر دی ہیں۔	real
872	پشاور ہائی کورٹ نے محفوظ فیصلہ سناتے ہوئے 25 ملزمان، جن کو ضمانت پر رہا کیا گیا تھا، کی ضمانت مسترد کر کے انھیں کمرۂ عدالت سے گرفتار کرنے کا حکم دیا۔	real
873	پاکستان کے وزیراعظم کی جانب سے ہمسایہ ملک افغانستان کے دورے پر مبصرین کا کہنا ہے کہ دونوں ملکوں کے درمیان اعتماد کی بحالی اور اختلافات کے خاتمے میں وقت درکار ہوگا لیکن یہ باہمی تعلقات کی بہتری کے لیے اہم ہے۔	real
874	جماعت کے ترجمان قاری زبیر نے بی بی سی کو بتایا ہے کہ خادم رضوی کی وفات کی وجہ فی الحال معلوم نہیں ہے۔ ان کے مطابق گذشتہ چند روز سے ان کی طبیعت خراب تھی۔	real
875	مذہبی و سیاسی جماعت تحریک لبیک کے بانی خادم حسین رضوی کے بارے میں چند برس پہلے تک کچھ زیادہ معلوم نہیں تھا۔ پھر نومبر 2017 میں انھوں نے ایک ریلی کی قیادت کرتے ہوئے راولپنڈی اور اسلام آباد کے سنگم فیض آباد پر دھرنا دیا۔ تین برس بعد نومبر 2020 میں ایک مرتبہ پھر ان کی جماعت کے کارکنوں نے اسی مقام پر دھرنا دیا تھا جو حکومت کے ساتھ ایک معاہدے کے نتیجے میں ختم ہوا۔	real
876	حافظ محمد سعید پر الزامات تھے کہ انھوں نے کالعدم تنظیم کے لیے فنڈ اکھٹے کیے اور تنظیم کے لیے غیر قانونی قبضہ کیا۔ وہ پہلے ہی اس وقت جیل میں دہشت گردی سے متعلق ایک دوسرے مقدمے میں سزا کاٹ رہے ہیں۔	real
877	آپ کے اردگرد بہت سی ایسی خواتین ہوں گی جو وکالت کے شعبے سے منسلک ہیں۔ آپ کے حقوق کے تحفظ کے دوران اکثر اوقات انھیں خود ہراسانی کا سامنا کرنا پڑتا ہے۔ وہ صرف یہ چاہتی ہیں کہ انھیں عزت دی جائے۔	real
878	امریکہ میں دنیا میں سب سے زیادہ ہلاکتیں جبکہ پاکستان میں گزشتہ 24 گھنٹوں کے دوران کیے گئے ٹیسٹوں میں کورونا مثبت آنے کی شرح 6.9 فیصد رہی اور 24 گھنٹوں میں سامنے آنے والے کیسز کی تعداد 4 ماہ کے دوران ایک روز میں سب سے زیادہ ہے۔	real
879	ایک پاکستانی نژاد امریکی شہری جو واشنگٹن میں اپنے ریستوران سے روزانہ درجنوں ضرورت مند افراد کو مفت کھانا کھلاتے تھے مگر کورونا وائرس کی وبا کی وجہ سے حالات اتنے خراب ہو گئے کہ ان کو اس ریستوران کو چلانے کے لیے دوسروں سے مدد مانگنی پڑی۔	real
880	پاکستان میں بچوں کو فنی تعلیم کے بجائے ڈگری کے حصول پر زور دیا جاتا ہے۔ لیکن بہت سے نوجوان ہنر مندی یا ٹیکنیکل تعلیم حاصل کرتے ہیں۔ ایسے ہی کچھ نوجوانوں نے اپنے تجربات بی بی سی سے شیئر کیے۔	real
881	افغانستان پاکستان پر افغان طالبان کی حمایت کا الزام لگاتا ہیں جبکہ پاکستان، تحریک طالبان کے تمام حملوں کی ذمہ داری افغانستان پر ڈالتے ہیں اور کہتے ہیں کہ انڈیا پاکستانی طالبان اور بلوچ عسکریت پسندوں کے ذریعے پاکستان کے خلاف افغان سرزمین استعمال کر رہا ہے۔	real
882	پاکستانی عدالت نے بچوں کو جنسی زیادتی کا نشانہ بنا کر پورنو گرافی کے ذریعے پیسہ کمانے والے بین الاقوامی ڈارک ویب کے سرغنہ سہیل ایاز کو سزائے موت اور عمر قید کی سزا سنانے کے ساتھ جرمانہ ادا کرنے کا حکم دیا ہے۔	real
883	برفباری سے سوات کے محصور علاقوں سے اپنی مدد آپ کے تحت لوٹنے والے چند افراد کا کہنا تھا کہ دریائے سوات کے پانی میں چلتے ہوئے اگر کسی ساتھی کا پاؤں پھسلتا تو ہم سب کا سانس تھم جاتا تھا، ہر لمحے ڈر رہتا کہ اگر ایک پاؤں بھی غلط پڑ گیا تو کیا ہوگا۔	real
884	وفاقی وزیر برائے مذہبی امور اور حکومتی مذاکراتی ٹیم کے سربراہ نورالحق قادری کا کہنا ہے کہ دھرنا ختم کرنے کے لیے سب سے بڑا ڈیڈ لاک فرانس کے سفیر کو ملک بدر کرنے کے مطالبے کو پورا نہ کرنا تھا۔	real
885	انسانی حقوق کے کارکنوں کے مطابق ہراسانی کے واقعات میں ملوث افراد کی تقریریاں اس بات کی نشاندہی کرتی ہیں کہ حکومت اور باقی دیگر سیاسی جماعتیں انسانی حقوق، حقوق نسواں اور ان کے تحفظ کے لیے کتنے سنجیدہ ہیں۔	real
886	پاکستان کے زیر انتظام کشمیر میں بسنے والے شہری جو غلطی سے لائن آف کنٹرول عبور تو کر گئے مگر کبھی واپس نہیں آئے اور برسوں سے ان کے گھر والے ان کی واپسی کی آس لگائے بیٹھے ہیں۔	real
887	پولیس کے مطابق بلوچستان کے علاقے تربت میں فائرنگ کے ایک واقعے میں تین ایرانی شہری مارے گئے۔ جن میں ایران کو مطلوب ملا عمر ایرانی بھی شامل ہیں۔	real
888	پاکستانی حکام کے مطابق ایک مسافر کی طبیعت خراب ہونے پر ایک انڈین طیارے نے کراچی ایئر پورٹ پر ہنگامی لینڈنگ کی۔	real
889	ایف آئی آر کے مطابق نواب شاہ پولیس کو اطلاع ملی کہ گندم کے فصل میں ایک لڑکی کی لاش موجود ہے، جب پولیس وہاں پہنچی تو 14 سال کی عمر کی لڑکی کی برہنہ لاش موجود تھی جس کے بال اور بازو جھلس چکے تھے، لاپتہ لڑکی کے بھائی نے تصدیق کی کہ یہ ان کی گمشدہ بہن ہے۔	real
890	پاکستان سپر لیگ کے پانچویں ٹورنامنٹ کے فائنل میں کراچی کنگز نے لاہور قلندرز کو شکست دے کر پہلی مرتبہ ٹی ٹوئنٹی میچوں کا یہ ٹورنامنٹ اپنے نام کر لیا ہے۔	real
891	جب پاکستان کے دفترِ خارجہ کے ترجمان زاہد حفیظ چوہدری سے فرانس کے سفیر کی بے دخلی کے بارے میں پوچھا گیا تو انھوں نے بتایا کہ ’تاحال پاکستان نے کوئی فیصلہ نہیں لیا ہے۔ جب وقت آئے گا تو میڈیا کو بتادیا جائے گا۔‘	real
892	پاکستان کے وزیر اعظم عمران خان نے حکومت کی جانب سے ملک میں انتخابی عمل میں کچھ اہم اصلاحات کا اعلان کیا ہے۔	real
893	پاکستان پیپلز پارٹی نے منگل کو ایک بیان جاری کیا ہے جس میں بختاور بھٹو زرداری اور ان کے ہونے والے منگیتر محمود چوہدری سے متعلق ’سوشل اور الیکٹرانک میڈیا پر شیئر کی جانے والی غلط خبروں کی وضاحت کی گئی ہے۔‘	real
894	پاکستان میں گلگت بلتستان کی تیسری قانون ساز اسمبلی کے انتخاب کے غیر حتمی نتائج لگ بھگ سامنے آ گئے ہیں اور اب حکومت سازی کے لیے حکمراں جماعت پاکستان تحریک انصاف متحرک نظر آتی ہے جبکہ حزب اختلاف کی جماعتیں بھرپور احتجاج کا اعلان کر رہی ہیں۔	real
895	پاکستانی کرکٹ ٹیم کے آگے بڑھتے ہوئے سفر کے دوران دو سینیئر کھلاڑی شعیب ملک اور محمد حفیظ ہمیشہ موضوع گفتگو رہے ہیں۔ یہ گفتگو اُن کے مستقبل کے بارے میں ہوتی رہتی ہے اور حالیہ دنوں میں اس میں کافی شدت رہی ہے۔	real
896	جہاں کچھ سوشل میڈیا صارفین اسے حکمراں جماعت تحریک انصاف کی کامیابی قرار دے رہے ہیں وہیں ناقدین کا کہنا ہے کہ ایک سیاسی و مذہبی گروہ حکومت کو خارجہ امور پر ’کیسے حکم دے سکتا ہے؟‘	real
897	قبائلی علاقے سے تعلق رکھنے والے عطااللہ کہتے ہیں کہ جب ٹیسٹ کے نتائج آئے اور ان میں ایزوسپرمیا کی تشخیص ہوئی تو قبائلی روایات کے برعکس انھوں نے صاف صاف اپنی اہلیہ کو اصل مسئلے سے آگاہ کر دیا اور اب وہ خود اپنا علاج کرا رہے ہیں۔	real
898	سجاد باجوہ نے وزیر اعظم عمران خان، وزیر اعظم کے پرنسپل سیکرٹری اعظم خان اور مشیر مرزا شہزاد اکبر پر براہ راست الزام عائد کرتے ہوئے کہا کہ یہ لوگ شوگر مافیا میں چند طاقتور عناصر کو بچانا اور مالی فائدہ دینا چاہتے تھے اور اُن کے خلاف ہونے والی ’جعلی کارروائی‘ کے پیچھے بھی ان ہی کا ہاتھ تھا۔	real
899	پاکستان کی وفاقی حکومت نے اسلام آباد میں فرانسیسی سفیر کی ملک بدری کے مطالبے کے ساتھ دھرنا دینے والی جماعت تحریک لبیک پاکستان کے سربراہ خادم حسین رضوی سے چار نکات پر مذاکرات کر لیے ہیں جس کے بعد یہ دھرنا ختم کر دیا گیا ہے۔	real
900	اداکار محمد احمد کہتے ہیں کہ ’اب تو یوں ہوتا ہے کہ جب بھی مجھے کوئی آفر آتی ہے تو میں یہ سوال کرتا ہوں مرنا کون سی قسط میں ہے۔‘	real
901	اس بار یہ سوال عام ہے کہ اب پھر کیوں؟ نہ سول ملٹری تناؤ، نہ پنڈی اسلام آباد میں کچھاؤ، منتوں مرادوں سے لائی گئی ایک صفحے کی حکومت، ایک بیانیہ اور ایک تحریر۔ پھر یہ حادثہ کیوں کر ہوا؟ آخر اس کی پرورش بھی تو سالوں ہوئی ہو گی۔ حادثے بہرحال اچانک نہیں ہوا کرتے: پڑھیے عاصمہ شیرازی کا کالم۔	real
902	مریم نواز شریف اور بلاول بھٹو زرداری نے گلگت بلتستان میں ہونے والے انتخابات میں حکمران جماعت پی ٹی آئی پر دھاندلی کے الزامات عائد کیے ہیں۔ مقامی و سرکاری ذرائع ابلاغ پر نشر کردہ غیر حتمی نتائج کے مطابق پاکستان تحریک انصاف کو ان انتخابات میں برتری حاصل ہے۔	real
903	ایف ایم سٹیشنوں سے زیادہ مؤثر اور ہومیوپیتھک میڈیا کسی حکومت کو نہیں مل سکتا لیکن خدا جانے حکومت کے کان کس نے بھرے ہیں کہ جن شرطوں پر 15 سال پہلے لائسنس ملے تھے اب اس سے دگنا پیسہ مانگ رہی ہے اور یہ بھی کہہ رہی ہے کہ ابھی دو ورنہ دھندہ بند کرو اور گھروں میں بیٹھو: محمد حنیف کا کالم	real
904	بعض مبصرین کا کہنا ہے کہ اگر سنہ 2017 میں کیے جانے والے فیض آباد دھرنے سے متعلق جسٹس قاضی فائز عیسی کے فیصلے پر عمل درآمد کیا جاتا تو شاید تحریک لیک دوبارہ دھرنا نہ دیتی۔	real
905	پاکستان میں آج قومی رابطہ کمیٹی (این سی سی) کے اجلاس میں ملک بھر کے تعلیمی اداروں میں وائرس کے پھیلاؤ کا مزید ایک ہفتے تک جائزہ لینے کا فیصلہ کیا گیا ہے۔ اس بار سردیوں کی طویل چھٹیاں متوقع ہیں۔ اجلاس میں فیکٹریاں اور کاروبار بند نہ کرنے کا فیصلہ بھی ہوا۔	real
906	پاکستان کے صوبہ خیبر پختونخواہ کے ضلع مانسہرہ کے سیاحتی مقامات کاغان اور ناران میں شدید برفباری کے نتیجے پھنسے ہوئے سیاحوں کو کو انتظامیہ نے کئی گھنٹوں کے محنت کے بعد نکال پر محفوظ مقامات تک پہنچا دیا ہے۔	real
907	پاکستان میں ایک قبائلی جرگے نے تقریباً ایک ماہ قبل خانہ بدوش قبیلے سے تعلق رکھنے والی نو بچوں کی ماں کو ’کاری‘ قرار دے کر قتل کرنے کا فیصلہ کیا تھا تاہم اب اس مقدمے میں تین ملزمان گرفتار کر لیے گئے ہیں۔	real
908	کراچی کے علاقے ناظم آباد سے افغانستان کے ضلع بکوا تک: پرویز مشرف اور فرانسیسی انجینیئرز پر حملوں میں ملوث القاعدہ برصغیر کے نائب سربراہ محمد حنیف کون ہیں؟	real
909	پاکستان میں ’بلیو کالر‘ نوکری اور ووکیشنل ٹریننگ کو وہ مقام حاصل کیوں نہیں ہے جو ’وائٹ کالر‘ نوکریوں اور یونیورسٹیز اور کالجوں کے ذریعے ڈگریاں حاصل کرنے والوں کو ہے؟	real
910	یہ پہلا موقع نہیں ہے کہ کسی بولر نے شاہد آفریدی کو آؤٹ کرنے کے بعد خوشی سے جشن منانے کے بجائے سینئر کے احترام کے طور پر خاموشی اختیار کرلی ہو۔	real
911	ہم بس یہ کر رہے ہیں کہ نظام کی خستہ چادر میں جہاں جہاں سوراخ نظر آتا ہے وہاں وہاں فوری طور پر ایڈہاک قانون سازی کا پیوند لگا دیتے ہیں۔ اب تو پیوند کی بھی گنجائش نہیں رہی، اب تو پیوند پر پیوند لگ رہے ہیں۔ پڑھیے وسعت اللہ خان کا کالم۔	real
912	اس عمر میں اتنے روز ماں سے دور رہنا اور ایک ایسے جرم کا شکار ہونا جس کو بیان کرنے کے لیے اس بچی کے پاس الفاظ بھی نہیں تھے۔ سچ پوچھیے تو شاید اس ویڈیو کو دیکھنے والا کوئی بھی شخص اب کبھی چین کی نیند نہیں سو سکتا۔ پڑھیے آمنہ مفتی کا کالم	real
913	پاکستان کے بانی محمد علی جناح کا اپنی بیٹی دینا کو ننھیال میں چھوڑنے کا فیصلہ اس حوالے سے تو بڑا اچھا ثابت ہوا کہ دینا کو ایک محبت سے بھرپور فضا میسر آگئی مگر اس حوالے سے بڑا نقصان دہ ثابت ہوا کہ وہ آہستہ آہستہ ایک سراسر غیر اسلامی ماحول میں ڈھل گئیں۔	real
914	پروین میر بلوچستان کی وہ پہلی خاتون ہیں جنھوں نے ایک علاقے کے عوام کی مشکلات اور تکالیف کو اجاگر کرنے اور ان کے مسائل کو حل کروانے کے لیے اتنا طویل پیدل مارچ کیا۔	real
915	پاکستانی اعلیٰ حکام کا کہنا ہے کہ ان کے پاس اس بات کے ’ناقابلِ تردید شواہد‘ ہیں کہ پاکستان میں ہونے والی دہشت گردی کی سرگرمیوں میں ’انڈیا اور اس کے انٹیلیجنس ادارے ملوث ہیں۔‘	real
916	کورونا وائرس کی وجہ سے پاکستان میں لاک ڈاؤن لگنے کی وجہ سے جب معیشت کا پہیہ رکا تو اس نے نجی شعبے میں کاروبار کو شدید متاثر کیا تاہم ملازمتوں سے فارغ ہونے والے بہت سے افراد نے مختلف نوع کے کاروبار شروع کر کے اپنی روزی کمانے کا سلسلہ شروع کر دیا۔	real
917	کشمیر میں وادی نیلم کے مختلف سیکٹرز میں جمعے کو گولہ باری اور شیلنگ کے واقعات کے بعد پاکستان اور انڈیا نے ایک دوسرے پر لائن آف کنٹرول پر سیز فائر کی خلاف ورزی کا الزام عائد کیا ہے۔	real
918	لاہور قلندر کے مالک فواد رانا نے کہا ہے کہ وہ پی ایس ایل کی واپسی کے ساتھ کراچی میں اپنی ٹیم کا میچ دیکھنے آ رہے ہیں۔	real
919	دنیا بھر میں کورونا وائرس کی دوسری لہر کے خدشات کے پیش نظر اقدامات کا سلسلہ جاری ہے جبکہ کئی ملکوں میں نئے متاثرین اور اموات میں مسلسل اضافہ دیکھا جا رہا ہے۔	real
920	ہندوستان میں تحریک خلافت چلانے والے دو اہم کرداروں محمد علی اور شوکت علی کی والدہ بی اماں، جنھوں نے بیٹوں کی گرفتاری کے بعد ناصرف عملی سیاست میں قدم رکھا بلکہ اس تحریک کو چلانے میں پیش پیش رہیں۔	real
921	وکلا کا کہنا ہے یہ عدالتیں بھی رہیں گی، قانون اور آئین بھی یہیں رہے گا لیکن ایسا جج جس کا دل شیر کی طرح ہو اور کسی دباؤ یا دھمکی سے مرعوب نہ ہوتا ہو ایسا جج مشکل سے آئے گا۔	real
922	جمعے کو انڈیا اور پاکستان کے زیر انتظام کشمیر کے مختلف سیکٹروں پر دونوں جانب سے گولہ باری اور شیلینگ کے واقعات کے بعد پاکستان اور انڈیا نے ایک دوسرے پر لائن آف کنٹرول پر جنگ بندی کی خلاف ورزی کا الزام عائد کیا ہے جبکہ اس کے باعث ایل او سی کے دونوں جانب متعدد افراد کے ہلاک اور زخمی ہونے کی اطلاعات ہیں۔	real
923	پاکستان کے صوبہ سندھ کے ضلع کشمور میں پولیس کا کہنا ہے کہ ایک ماں اور اس کی کمسِن بچی سے ریپ کا مرکزی ملزم فائرنگ کے واقعے میں ہلاک ہو گیا ہے۔	real
924	وفاقی وزیر اسد عمر نے بی بی سی کو انٹرویو دیتے ہوئے کہا ہے کہ ’لیفٹیننٹ جنرل ریٹائرڈ عاصم باجوہ کی اتھارٹی کی مدت ختم ہو گئی ہے لیکن وہ آج بھی میرے لیے بہت کار آمد ثابت ہو رہے ہیں۔ میں ان کا بے حد شکر گزار ہوں جس طرح وہ آج بھی ہماری مدد کررہے ہیں۔‘	real
925	بی بی سی کو دیے گئے ایک انٹرویو میں منال خان کا کہنا تھا کہ جب وہ ناظرین کی اتنی بڑی تعداد کو جلن اور نند جیسے ڈراموں کے بارے میں بات کرتا دیکھتی ہیں تو انھیں ان ڈراموں کی مقبولیت کا یقین نہیں آتا۔	real
926	تنویر احمد کے ایک دوست جو کہ برطانوی پارلیمان کے رکن بھی ہیں، کے خط کا جواب دیتے ہوئے برطانیہ کے وزیر اعظم بورس جانسن نے کہا ہے کہ انھوں نے (احمد تنویر کے خلاف) 'اس بُرے طرز عمل پر' اپنے تحفظات کا اظہار کیا ہے۔	real
927	لاہور کے میانی صاحب قبرستان میں قبرکشائی کی کارروائی کے دوران ایک بزرگ خاتون آگے بڑھتی ہیں۔ لاش کے بالوں کو ٹٹولتی ہیں، ماتھے کو گھورتی ہیں اور دانتوں پر ایک ماہر دندساز کی طرح غور کرنے کے بعد پیروں کی ساخت دیکھی ہیںپھر ان کی آماز بلند ہوتی ہے ’یہ میرے بیٹے کی لاش نہیں ہے۔‘	real
928	سوشل میڈیا پر وائرل ہونے والی ویڈیو میں دیکھا جا سکتا ہے کہ ایک ماں اپنی چار سالہ بیٹی سے پولیس کی موجودگی میں پوچھ رہی ہے کہ اس کے ساتھ کیا ہوا تھا اور بچی اس واقعے کو بیان کرنے کی کوشش کر رہی ہے۔	real
929	ایف آئی اے کی طرف سے جاری ہونے والی لسٹ میں ایم کیو ایم کے بانی الطاف حسین کا نام بھی شامل ہیں جبکہ اس کے علاوہ ان کے قریبی ساتھی محمد انور کا نام بھی شامل ہے۔ ان افراد کو ڈاکٹر عمران فاروق قتل کے مقدمے میں اشتہاری قرار دیا گیا ہے اس کے علاوہ ان پر ریاست کے خلاف تقاریر کرنے کے مقدمات بھی درج ہیں۔	real
930	سندھ کے صحرائی علاقے تھر میں ایک بیل کا پھولوں کی مالا پہنا کر استقبال کیا گیا، یہ بیل مٹھی شہر سے چوری ہو گیا تھا ایک ہفتے کی تگ و دو کے بعد اس کو واپس لایا گیا۔ یہ کوئی عام بیل نہیں بلکہ ’سوجیو بیل‘ ہے۔	real
931	پاکستان مسلم لیگ نواز کی نائب صدر مریم نواز نے دعویٰ کیا ہے کہ اسٹیبلشمنٹ کی جانب سے ان کے قریبی ساتھیوں سے بات چیت کے لیے رابطے کیے گئے ہیں اور پی ڈی ایم کے پلیٹ فارم سے مذاکرات کے آغاز پر غور کیا جا سکتا ہے لیکن پہلے موجودہ حکومت کو جانا ہو گا۔	real
932	لاہور کی رہائشی سارہ کورونا وائرس کی دوسری لہر سے خاصی خوف زدہ ہیں جبکہ ان کا بیٹا لاہور کے ایک نجی سکول کی دوسری جماعت میں زیر تعلیم ہے۔ وہ اپنے بچے کی صحت پر کوئی بھی سمجھوتا کرنے کے لیے ہرگز تیار نہیں ہیں۔	real
933	پیپلز پارٹی کے ٹکٹ پر گلگت بلتستان کے ضلع تانگیر سے پہلی بار کوئی خاتون الیکشن لڑ رہی ہیں اور یہ وہ علاقہ ہے جہاں خواتین کا ووٹ ڈالنا تو دور کی بات انھیں گھر سے نکلنے اور نامحرم سے بات تک کرنے کی اجازت نہیں۔	real
934	پاکستان مسلم لیگ (ن) کی نائب صدر مریم نواز کی جانب سے جیل میں ان کے قید خانے میں کیمرے نصب کرنے کے الزامات کے بعد پاکستان میں جیلوں میں خواتین سے روا رکھے جانے والے سلوک اور انھیں دستیاب سہولتوں کے بارے میں ایک بار پھر بحث چھڑ گئی ہے۔	real
935	گذشتہ ڈھائی ماہ کے دوران پاکستانی روپیہ ایشیا میں تیسرے نمبر پر ڈالر کے مقابلے میں اپنی قدر میں اضافہ کرنے والی کرنسی بن چکا ہے۔ اس عرصے کے دوران صرف انڈونیشیا اور جنوبی کوریا کی کرنسیوں کی قدر میں پاکستانی کرنسی سے زیادہ اضافہ دیکھنے کو ملا۔	real
936	منگل کو منظر عام پر آنے والی ایک ویڈیو میں ایک خاتون بس کے عملے کے ساتھ الجھ رہی ہیں اور ان پر ہراس کا الزام عائد کرنے کی دھمکی دیتی ہیں۔ اس ویڈیو نے سوشل میڈیا پر پہلے سے جاری بحث کو ایک نیا رخ دے دیا ہے۔	real
937	جب جنرل باجوہ کی ایکسٹینشن والے معاملے پر پٹیشن ہوئی کہ اس کا قانون ہی موجود نہیں ہے تو وہ بالکل جذباتی نہیں ہوئے انھوں نے ٹھنڈے ٹھار لہجے میں کہا تو قانون بنا دو اور سب سلیکٹیڈ، ریجیکٹیڈ، ریاست کے اندر ریاست اور ریاست کے اوپر ریاست کا شور مچانے والوں نے بغیر جذباتی ہوئے سترہ منٹ میں قانون پاس کر دیا: محمد حنیف کا کالم	real
938	یاد رہے کہ بحیثیت چیف سلیکٹر یہ مصباح الحق کی آخری سلیکشن ہے۔ وہ اس عہدے سے مستعفی ہو چکے ہیں اور اب پاکستان کرکٹ بورڈ نئے چیف سلیکٹر کا تقرر کرے گا۔	real
939	پاکستان کے صوبہ سندھ ایک ڈاکٹر نے کشمور میں ریپ کا شکار ہونے والی بچی کے حوالے سے بتایا ہے کہ بچی انتہائی وحشیانہ رویے کا سامنا کرنا پڑا ہے جسم پر تشدد کے نشان موجود تھے، پیٹ کی آنت بھی نکل آئی ہے اس کے لیے لیپروٹامی سرجری کی گئی۔	real
940	پاکستان میں انسانی حقوق کی وزیر شیریں مزاری سمیت بہت سے شہری اسلام آباد میں قائم امریکی سفارتخانے سے معافی کا مطالبہ کر رہے ہیں۔ لیکن ایسا کیوں؟	real
941	پاکستان میں کورونا وائرس کی دوسری لہر کے پیش نظر نیشنل کمانڈ اینڈ آپریشن سینٹر، این سی او سی نے ملک بھر میں بڑے اجتماعات پر پابندی عائد کرنے اور سینیما گھر، تھیٹر اور مزاروں کو مکمل طور پر بند کرنے کی تجویز دی ہے۔	real
942	پنجاب پولیس نے حال ہی میں 'ویمن سیفٹی' کے نام سے ایک موبائل ایپلیکیشن متعارف کروائی ہے۔ خواتین کے لیے یہ سہولت ہے کہ وہ کسی بھی قسم کے خطرے میں اس ایپ کے ذریعے پولیس سے فوری رابطہ کر سکتی ہیں لیکن کچھ خواتین اس کے استعمال کے حواے سے تذبذب کا شکار ہیں۔	real
943	11 نومبر کو لاہور میں نواب محمد احمد خان قصوری کے قتل کی روداد جس کے الزام میں سابق وزیر اعظم ذوالفقار علی بھٹو کو پھانسی کی سزا دی گئی۔	real
944	یہ نصف صدی پہلے کا قصہ ہے جب کراچی میں شادی کی ایک ایسی تقریب منعقد ہوئی جس کی خوشی میں کراچی کے در و دیوار جگمگا اٹھے، یہ تقریب ٹیلی ویژن پر نشر ہوئی اور نکاح نامے پر دو ممالک کے سربراہان نے بطور گواہ دستخط کیے۔	real
945	پاکستان کرکٹ بورڈ نے اظہر علی کو ٹیسٹ ٹیم کی قیادت سے ہٹا کر ان کی جگہ بابر اعظم کو نیا کپتان مقرر کیا ہے۔ اس طرح بابر اعظم اب تینوں فارمیٹ کے کپتان بن گئے ہیں۔	real
946	آج کل پاکستان میں جہاں ملکی تاریخ کی سب سے مہنگی شادیوں میں سے ایک کا چرچا ہے، وہیں سوشل میڈیا پر اس جوڑے کی بات کرنے والے بھی کم نہیں جس نے اپنی شادی پر چند ہزار روپے ہی خرچ کیے۔	real
947	اس نئے منصوبے کے تحت آپ کو صرف خوبصورت علاقے ہی نہیں بلکہ مقامی لوگوں کے ساتھ رہنے کا موقع بھی ملے گا۔ آپ ان کے بارے میں جان سکیں گے اور امید کی جا رہی ہے کہ اس طرح ایک دوسرے کے کلچر اور رہن سہن سے آگہی بھی ہو سکے گی۔	real
948	نواز شریف نے ٹوئٹر پر اپنے ایک پیغام میں کہا کہ کراچی واقعے کی انکوائری رپورٹ حقائق کو چھپانے کی کوشش ہے جس کا مقصد جونیئرز کو قربانی کا بکرا بنانا اور اصل مجرموں کو بچانا ہے۔	real
949	پاکستانی فوج کا کہنا ہے کہ پاکستان مسلم لیگ کے رہنما کیپٹن (ر) صفدر کی کراچی میں حراست اور اس سے قبل آئی جی سندھ کے ساتھ پیش آنے والے واقعات کی تحقیقات مکمل ہونے پر پاکستان رینجرز اور آئی ایس آئی کے متعلقہ افسران کو تفویض کی گئی ذمہ داریوں سے سبکدوش کر دیا گیا ہے۔	real
950	برطانوی حکومت کے مطابق ملک کا ادارہ صحت کورونا وائرس کے علاج کے لیے جلد از جلد ویکسین فراہم کرنے کے لیے تیار ہے۔ یہ بیان ایک ایسے وقت میں سامنے آیا ہے جب ادویات ساز بین الاقوامی کمپنی فائزر اور بائوٹیک نے بھی اعلان کیا ہے کہ ان کی جانب سے بنائی گئی ویکسین 90 فیصد افراد کو کووڈ 19 سے بچا سکتی ہے۔	real
951	سونیا حسین کہتی ہیں کہ ڈپریشن، اینگزائیٹی، سٹریس جیسی بیماریاں ہمارے معاشرے کا حصہ ہیں لیکن جن کو یہ لاحق ہوتی ہیں ہمارے ہاں انھیں ’پاگل‘ یا ’ایب نارمل‘ قرار دے کر لوگ بری الذمہ ہو جاتے ہیں۔	real
952	وزیر داخلہ اعجاز شاہ نے اپنے اس بیان پر وضاحت دی ہے جس میں انھوں نے کہا تھا کہ خیبر پختونخوا کی سیاسی اے این پی کی قیادت پر قاتلانہ حملے ان کے دہشت گردی کے خلاف بیانات پر طالبان کے ردعمل میں ہوئے تھے۔	real
953	گلگت بلتستان میں انتخابی مہم پورے جوش و خروش سے جاری ہے اور مختلف سیاسی پارٹیوں کے سربراہان نے اس خطے میں ڈیرے جما رکھے ہیں۔ بی بی سی کی فرحت جاوید نے حال ہی میں اس خطے کا دورہ کیا اور ووٹرز سے جاننے کی کوشش کی کہ وہ ان انتخابات کو کیسے دیکھ رہے اور اس مرتبہ کس جماعت کا ساتھ دیں گے۔	real
954	پی ڈی ایم جلسوں کے بعد اپوزیشن کا بیانیہ ’نامی گرامی‘ شخصیات کو تو شاید اتنا ظاہری نقصان نہیں پہنچا سکا جتنا حکومت کی ساکھ کو پہنچایا ہے۔ یہی وجہ ہے کہ کپتان کو پُرانے ساتھی کی یاد ستائی اور جہانگیر ترین چینی سے زیادہ میٹھے رشتے کا پاس رکھتے ہوئے ایک خوشگوار صبح وطن واپس تشریف لے آئے۔ ناں کوئی روک نا ٹوک۔	real
955	پاکستان میں ایک نجی بینک کے مینیجر کی جانب سے اپنی خاتون ساتھی کو غیر مناسب طریقے سے چھونے کی ویڈیو سامنے آنے پر سوشل میڈیا پر یہ بحث ہونے لگی جس میں بیشر افراد ویڈیو میں نظر آنے والی خاتون کے سکتے میں آجانے اور اسی وقت کوئی ردِعمل نہ ظاہر کرنے پر انھیں ہی موردِ الزام ٹھہراتے نظر آ رہے ہیں۔	real
956	کورونا کی ’دوسری لہر‘ کے پیش نظر حکومت نے شادیوں سے متعلق نئی ایس او پیز جاری کی ہیں جن کے مطابق اب صرف آؤٹ ڈور شادیوں کی اجازت ہوگی۔	real
957	سنہ 2016 میں بابر اعظم کے ٹی ٹوئنٹی انٹرنیشنل ڈیبیو کے بعد سے اب تک پاکستان نے اٹھارہ کھلاڑیوں کو ٹی ٹوئنٹی انٹرنیشنل میں کھیلنے کا موقع فراہم کیا ہے جن میں سے چھ کھلاڑی خود بابراعظم کی قیادت میں اس مختصر دورانیے کے فارمیٹ میں متعارف کرائے گئے ہیں لیکن ان اٹھارہ میں متعدد کھلاڑی اب منظرعام پر موجود نہیں ہیں۔	real
958	پاکستان کے صوبہ سندھ کے ضلع سانگھڑ کی تحصیل کھپرو میں سنیچر کے روز غیرت کے نام پر قتل کی گئی خاتون گلشانہ شر کے قتل کا مقدمہ ان کے بھائی سمیت سات افراد کے خلاف درج کر لیا گیا ہے۔	real
959	ملک کے شمالی خطے میں جاری انتخابی مہم میں حصہ لینے والے مسلم لیگ نواز کے رہنما اور نواز شریف کی صاحبزادی مریم نواز کے شوہر کیپٹن محمد صفدر اعوان میں بھی کورونا وائرس کی تشخیص ہوئی ہے۔ اس سے قبل پاکستان پیپلز پارٹی کے رہنما قمر زمان کائرہ میں بھی کورونا وائرس کی تشخیص ہوئی۔	real
960	اگرچہ پارٹی چھوڑنے والے دونوں رہنماؤں نے دعویٰ کیا کہ ان کے ساتھ نواز لیگ بلوچستان کے 20 اضلاع کے عہدیداروں نے پارٹی سے علیحیدگی اختیار کی ہے تاہم ان کے ساتھ ایسے رہنماﺅں کی اتنی بڑی تعداد نظر نہیں آئی۔	real
961	سندھ ہائی کورٹ کی جانب سے گذشتہ ہفتے مسیحی لڑکی کی عمر کے تعین کے لیے تشکیل کیے گئے میڈیکل بورڈ نے لڑکی کو نوعمر قرار دے دیا ہے جبکہ پولیس نے مبینہ ملزم کے خلاف چائلڈ میرج ایکٹ کی خلاف ورزی کا مقدمہ بھی درج کر لیا ہے۔	real
962	شوگر کمیشن کی رپورٹ میں بتایا گیا تھا کہ جہانگیر ترین سمیت حکومتی اور حزبِ اختلاف سے تعلق رکھنے والے کئی سیاستدانوں کی ملکیت شوگر ملز سالہا سال سے دھوکہ دہی اور فراڈ کے ذریعے چینی کی قیمت میں مصنوعی اضافہ کر کے منافع کمانے کے عمل میں شامل رہے ہیں۔	real
963	وان جونز کی طرح میرے وطن جیسے بیسیوں ممالک کے کروڑوں لوگ بھی اس دن کے انتظار میں ہیں جب ہمارے ہاں بھی سچائی چار برس چھوڑ چار دن کے لیے ہی جھوٹ پر فتح پا لے۔ پڑھیے وسعت اللہ خان کا کالم	real
964	اس میں کوئی شبہ نہیں کہ جون ایلیا کی شاعری خصوصاً محبوبہ کو مخاطب کر کے کی جانے والی شاعری نوجوانوں کو متوجہ کرتی ہے۔ مگر یہ فیس بک کا کمال ہے کہ جون ایلیا اس وقت اردو کے مقبول ترین شاعر بن چکے ہیں۔	real
965	پاکستان کے صوبہ خیبر پختونخوا کے شہر پشاور کے مضافات میں تھانہ بڈھ بیر کے علاقے شیخ محمدی میں نامعلوم افراد نے جماعتِ احمدیہ سے تعلق رکھنے والے تقریباً 75 سالہ شخص محبوب احمد کو فائرنگ کرکے قتل کر دیا ہے۔	real
966	کسان کا خام مال کوڑیوں کے مول خریدنے کی یہ ظالمانہ روایت اب ختم کرنی ہو گی۔ کسان شاید مزید احتجاج بھی نہ کریں، آپ ان کی گندم سستی خرید کے مہنگی روٹی بیچ کے کمائیں گے کیا؟ چند ٹکے؟ پڑھیے آمنہ مفتی کا کالم۔	real
967	اسلام آباد کے ڈپٹی کمشنر کے مطابق شہر کے ایک نجی بینک کی انتظامیہ نے اپنے اس افسر کو نوکری سے برخاست کر دیا ہے جس کی بینک کی ایک خاتون ملازم کو جنسی طور پر ہراساں کرنے کی ویڈیو سامنے آئی تھی جبکہ ملزم کو حراست میں لے لیا گیا ہے۔	real
968	پولیس حکام کے مطابق غیر ملکی لڑکیاں صبح ہائیکنگ کے لیے اسلام آباد کے مضافات میں پہاڑی علاقے کی جانب گئیں تو وہاں انھیں بعض لڑکوں نے ہراساں کیا جس کے بعد ان کے درمیان ہاتھا پائی بھی ہوئی۔	real
969	دیکھنا یہ ہو گا کہ بابر اعظم کیسے اس بھولی بھٹکی ٹیم کو اپنی قائدانہ صلاحیتوں سے راہ سُجھاتے ہیں۔ بابر کی ذمہ داری اب صرف اپنی ٹیم کی رینکنگ کو بہتر بنانا ہی نہیں بلکہ اس جیت کی بھولی بسری عادت کو پھر سے اپنے ڈریسنگ روم کے خمیر میں ڈالنا ہے جہاں ہار پاکستان کے لیے اتنی مہنگی ہو چکی تھی کہ سرفراز کی ٹیم 33 میں سے 29 میچز میں یہ 'افورڈ' ہی نہیں کر پائی تھی اور جیت پر ہی اکتفا کرتی رہی۔	real
970	اسلام آباد کے ہسپتالوں میں وینٹیلیٹر کی عدم دستیابی کا معاملہ سوشل میڈیا پر بھی اٹھایا گیا اور کئی لوگوں نے اس معاملہ پر ڈپٹی کمشنر اسلام آباد حمزہ شفقات کو سماجی رابطے کی ویب سائٹ ٹوئئٹر پر ٹیگ بھی کیا اور وینٹیلیٹرز کے حوالے سے سوالات اٹھائے۔	real
971	چینی کا بحران ایوب خان حکومت کے خاتمے کی اہم وجوہات میں سے تھا لیکن متعدد دیگر واقعات ایسے بھی تھے جنھوں نے ان کے عہد کے خاتمے کی راہ ہموار کی۔	real
972	محسن شیرازی پر الزام ہے کہ اُنھوں نے سی ڈی اے کے صفائی کے عملے کے مسیحی ارکان کے خلاف پیغمبر اسلام کی توہین کا مقدمہ درج کروانے کی دھمکی دی۔	real
973	پاکستان کے صوبے پنجاب کے دارالحکومت لاہور میں پاکستان کسان اتحاد اور کسان رابطہ کمیٹی نے گذشتہ روز احتجاجی مظاہرے کے دوران ہلاک ہونے والے کسان اشفاق لنگڑیال کی موت کا ذمہ دار ایس پی صدر اور سی سی پی او لاہور کو قرار دیتے ہوئے ان کی برطرفی کا مطالبہ کر دیا ہے۔	real
974	پاکستان کے وزیراعظم عمران خان نے مسلم لیگ ن کے سربراہ میاں نواز شریف کی جانب سے اپنی تقاریر میں آرمی چیف اور خفیہ ایجنسی کے سربراہ کا نام لیے جانے کو شدید تنقید کا نشانہ بنایا ہے اور ان پر الزام عائد کیا ہے کہ وہ فوج سے کہہ رہے ہیں کہ وہ بغاوت کرے۔	real
975	سندھ ہائی کورٹ نے 10 گرام چرس پینے اور رکھنے کی اجازت دینے کی درخواست مسترد کردی ہے اور درخواست گذار وکیل پر برہمگی کا اظہار کیا اور کہا کہ آپ چاہتے ہیں کہ سب لوگ چرس پینا شروع کردیں۔	real
976	پنجاب یونیورسٹی کے ایک لیکچرر سے لے کر کر ارب پتی کاروباری تک اور ’جہیز‘ میں ملنے والی سیاست سے لے کر پی ٹی آئی کی عہدیداری تک جہانگیر ترین نے کامیابیوں کی ایسی داستانیں رقم کی ہیں جن کی مثال پاکستان میں شاید کہیں اور نہ ملیں۔	real
977	پاکستان پیپلز پارٹی کے چیئرمین بلاول بھٹو زرداری کا کہنا ہے کہ اپوزیشن کی کُل جماعتی کانفرنس میں یہ اتفاق ہوا تھا کہ کسی ایک ادارے کا نام نہیں لیا جائے گا بلکہ صرف ’اسٹیبلیشمنٹ‘ کہا جائے گا۔	real
978	6 نومبر 2000 کو نوائے وقت کے دفتر پر ہونے والے اس حملے کو بعض کے نزدیک مکمل طور پر خودکُش یا پہلا خودکُش حملہ قرار دینا ’متنازع‘ ہوگا تاہم عمومی اتفاق ہے کہ پاکستان میں اس سے پہلے ’خودکش حملے‘ کا کوئی تصور نہیں تھا۔	real
979	بلوچستان کے دارالحکومت کوئٹہ کی ایک احتساب عدالت نے ضلع چاغی میں تانبے اور سونے کے سب سے بڑے منصوبے ریکوڈک میں ’بڑے پیمانے‘ پر بدعنوانی کے ریفرینسز پر 25 ملزمان کو نوٹسز جاری کیے ہیں جن میں غیر ملکی کمپنیوں کے اہلکار بھی شامل ہیں۔	real
980	کورونا وائرس کے پیشِ نظر اس مرتبہ تبلیغی جماعت کے اجتماع کے شرکا کی تعداد کو کم کرکے 50 ہزار تک رکھنے کی ہدایت کی گئی گئی ہے اور بیرون ملک سے آنے والے افراد پر پابندی عائد کی گئی ہے۔ بھارت سے صرف پانچ علما خصوصی اجازت کے تحت اجتماع میں شرکت کر سکیں گے۔	real
981	سندھ ہائی کورٹ میں مبینہ طور پر اغوا کر کے جبری طور پر مذہب تبدیل کیے جانے والی نو عمر مسیحی لڑکی نے بیان دیتے ہوئے کہا ہے کہ انھیں ’کسی نے اغوا نہیں کیا، مرضی سے مذہب تبدیل کیا‘ جبکہ عدالت نے لڑکی کی عمر کے تعین کے لیے میڈیکل بورڈ تشکیل دینے کا حکم جاری کیا ہے۔	real
982	نوجوانوں کے سیاست میں کردار سے متعلق بی بی سی نے ماضی کے طالبعلم رہنماؤں سے بات کی ہے اور ان سے یہ جاننے کی کوشش کی ہے کہ تب اور آج کے نوجوان میں کیا فرق ہے اور ان کا ملکی سیاست میں کردار کتنا اہمیت کا حامل ہے۔	real
983	وہ مہارانی تو نہ تھیں لیکن 19ویں صدی میں پنجاب کے مہاراجہ رنجیت سنگھ نے اُن کے نام کے سکے جاری کیے اور اُن کے نام سے ناپ تول کے پیمانے منسوب ہوئے۔ وہ کبھی لاہور کے شاہی قلعے میں قیام پذیر نہیں ہوئیں کیونکہ مہاراجہ خود اُن کی حویلی پر آیا کرتے تھے۔	real
984	جسٹس منصور علی شاہ نے اپنے اختلافی نوٹ میں صدارتی ریفرنس کو بدنیتی پر مبنی قرار دیا ہے جبکہ جسٹس مقبول باقر کے مطابق مرکزی دھارے کی کچھ سیاسی جماعتیں اور خفیہ ادارے جسٹس قاضی فائز عیسیٰ کو راستے سے ہٹانا چاہتے تھے۔	real
985	پاکستان کی سپریم کورٹ کے جج، جسٹس فیصل عرب وہ پہلے جج تھے جن کی سربراہی میں اس وقت کے پاکستان کے چیف جسٹس افتخار محمد چوہدری نے ایک تین رکنی بینچ تشکیل دیا تھا جس نے پرویز مشرف کے خلاف آئین شکنی کے مقدمے کی پہلی سماعت کی تھی۔	real
986	تجزیہ کاروں کا کہنا ہے کہ کابینہ کے دیگر ارکان کو فیاض الحسن چوہان کے کام کرنے کے طریقہ کار سے اختلافات تھے جبکہ ان کے بارے میں خیال تھا کہ وہ اپنی تشہیر زیادہ کرتے ہیں۔	real
987	ایسا نہیں تھا کہ تین نومبر سنہ 2007 کا دن آیا اور اس وقت کے فوجی صدر پرویز مشرف کو اچانک خیال آیا کہ کوئی ماورائے آئین کام کیا جائے اور اُنھوں نے اپنے اس خواب کی تعبیر کرتے ہوئے ملک میں ایمرجنسی کے نفاذ کا اعلان کر دیا ہو۔	real
988	پاکستان کے سب سے بڑے شہر کراچی میں مقامی ہندو آبادی اور ایک مندر پر مشتعل افراد کی جانب سے کیے جانے والے حملے کے بعد خواتین اور بچوں کو محفوظ مقام پر منتقل کر دیا گیا ہے جبکہ پولیس نے ہنگامہ آرائی کرنے والے نامعلوم افراد کے خلاف سرکار کی مدعیت میں توہین مذہب کا مقدمہ درج کر لیا ہے۔	real
989	پاکستان نے اس میچ کو سپر اوور تک زندہ رکھا، قابلِ تعریف بات ہے۔ لیکن سپر اوور میں جو کچھ ہوا، قابلِ غور بھی ہے اور باعثِ ندامت بھی: سمیع چوہدری کا کالم	real
990	کئی صارفین یہ بھی پوچھتے نظر آتے ہیں کہ کیا لڑکیاں دنیا میں صرف بیوی بننے اور بچے پیدا کرنے کے لیے آئی ہیں؟ ان کی زندگی کا اور کوئی مقصد نہیں؟	real
991	مری سے ایوبیہ جانے والے سیاحوں کو اب یہ تاریخی مقام بھی دیکھنے کا موقع ملے گا جو برطانوی فوج نے اپنی سہولت کے لیے 130 سال پہلے بنایا تھا۔	real
992	انڈیا اور امریکہ کے درمیان ہونے والے تازہ دفاعی معاہدے پر چین اور پاکستان دونوں کو تحفظات ہیں اور ماہرین کا کہنا ہے کہ تازہ معاہدہ خطے میں مزید تناؤ کا باعث بنے گا۔	real
993	غالب نے سر سید کو نصیحت کی کہ وہ ماضی پرستی ترک کر کے مستقبل کا سوچیں۔ انھوں نے سر سید کو سمجھایا کہ انھیں انگریزوں سے یہ سبق سیکھنا چاہیے کہ وہ کس طرح فطرت کی طاقتوں کو مسخر کر کے اپنے اجداد سے کہیں آگے نکل گئے ہیں۔	real
994	جمہوریت کا صحیح مطلب اور ماخذ ہمارے ہاں صرف ’وہ‘ سمجھتے ہیں۔ جہاں جسے جب چاہا لگا دیا جب چاہا ہٹا دیا۔۔۔ جب چاہا تحریر و تقریر کی آزادی دی جب چاہا چھین لی۔ جب چاہا انقلاب کے نعرے لگوائے، جب چاہا احتساب کو ہتھیار بنایا، کم و بیش بہتر سال سے جمہوریت کی بس یہی کہانی ہے۔	real
995	پنجاب کے وزیرِ اطلاعات فیاض الحسن چوہان کو اُن کے عہدے سے ہٹا کر ان کی جگہ فردوس عاشق اعوان کو وزیرِ اعلیٰ پنجاب کی مشیر برائے اطلاعات تعینات کر دیا گیا ہے جس پر سوشل میڈیا صارفین کی جانب سے طرح طرح کے تبصرے کیے جا رہے ہیں۔	real
996	پاکستان کے مقتدر ترین اخبار ڈان کے سابق مدیر اور انسانی حقوق کے سرگرم کارکن سلیم عاصمی کی زندگی اور ان کی آزادی صحافت کے لیے پاکستان میں ضیا الحق کے بدترین دور میں جدوجہد پر ان کے صحافی دوستوں اور ساتھیوں کی کچھ یادیں کچھ باتیں۔	real
997	کراچی میں امریکی صحافی ڈینیئل پرل کے اغوا کے بعد جب پورے ملک کی پولیس اور خفیہ ادارے عمر شیخ کو تلاش کر رہے تھے تو اعجاز شاہ نے اسے اپنے ہی گھر سے برآمد کر لیا تھا: محمد حنیف کا کالم	real
998	گھڑی کی سوئیوں نے اِدھر دس بجنے کا اعلان کیا اُدھر رات کے اندھیرے میں ایوب خان کا سُرخ وسپید چہرہ چمکا، انھوں نے صدر مملکت اسکندر مرزا کو سیلیوٹ کیا اور کہا ’سب ٹھیک ہے سر، آپریشن مکمل ہو چکا ہے۔‘	real
999	جانز ہاپکنز یونیورسٹی کے اعداد و شمار کے مطابق اب تک دنیا بھر میں 46,312,467 افراد میں کورونا کی تشخیص ہوئی ہے جبکہ اموات کی تعداد 1,198,000 ہے۔ بعض یورپی ممالک میں لاک ڈاؤن جبکہ کچھ ممالک میں حفاظتی ہدایات پر عملدرآمد پر دوبارہ زور دیا جا رہا ہے۔	real
1000	دنیا بھر کی طرح پاکستان میں بھی سرمایہ کاری کی جعلی سکیمز وقتاً فوقتاً سامنے آتی رہی ہیں، جن میں کم پیسوں کے بدلے قرضے، رہائشی پلاٹ، انشورنس، بڑے انعام، نوکری یا کثیر منافع کی پیشکش کی جاتی ہے۔ لیکن کیا ان فراڈ سکیموں سے بچ کر محفوظ سرمایہ کاری ہو سکتی ہے؟	real
1001	1980 کی دہائی کی طرح اب وہ حالات نہیں رہے جب پاکستان کی قدامت پسند سیاسی جماعتیں کھل کر رپبلکن صدارتی امیدواروں کی حمایت کیا کرتی تھیں، آج کے دور میں سیاسی و سرکاری حلقے اپنی پسند چھپانے کو ترجیح دیتے ہیں۔	real
1002	انڈین میڈیا پر غصہ ایسے ہی ہے جیسے چرچل جرمنی سے شکوہ کرے کہ نازی میڈیا اس کی تقاریر کو مسخ کر کے پیش کر رہا ہے یا بلی سے شکایت کی جائے کہ اس نے پرات میں پڑا دودھ بلا اجازت کیسے پی لیا: پڑھیے وسعت اللہ خان کا کالم۔	real
1003	اگرچہ ان جزائر پر اب کوئی مستقل آبادی موجود نہیں ہے مگر بھنڈار پر موجود جھونپڑیاں بتا رہی تھیں کہ ماہی گیر اس جزیرے کو استعمال ضرور کرتے ہیں۔ جزیرے کے درمیان ایک مزار موجود ہے، یہ قبر ایک بزرگ ’یوسف شاہ‘ کی بتائی جاتی ہے جس پر لگی رنگین جھنڈیاں اور پیروں کے نشانات بتا رہے تھے کہ ماہی گیروں کا یہاں آنا جانا لگا رہتا ہے۔	real
1004	سماجی رابطے کی ویب سائٹ ٹوئٹر پر گذشتہ روز سے یہ افواہیں گردش کر رہی ہیں کہ وزیر اعظم عمران خان کی تنقید کے بعد فرانسیسی حکام نے پاکستانی شہریوں کو فراہم کردہ 183 وزٹ ویزے مسترد کر دیے ہیں اور مناسب دستاویزات رکھنے والے 118 شہری کو بھی زبردستی جلاوطن کر دیا گیا ہے تاہم پاکستان کے دفتر خارجہ نے ان کی تردید کی ہے۔	real
1005	وزیر داخلہ بریگڈیئر (ر) اعجاز شاہ نے ایک عوامی تقریب میں تقریر کے دوران مسلم لیگ ن کے سیاسی بیانیے کو تنقید کا نشانہ بناتے ہوئے جو بیانات دیے انہیں سوشل میڈیا پر کھلی دھمکی قرار دیا جا رہا ہے۔	real
1006	سندھ وائلڈ لائف کے ڈائریکٹر کا کہنا تھا کہ ستر اور ساٹھ کی دہائی میں انڈس ڈولفن کی آماجگاہیں اٹک پر دریائے سندھ کے مقام سے شروع ہو جاتی تھیں۔ تاریخی طور پر انڈس ڈولفن دریائے ستلج، جہلم، راوی اور چناب میں بھی پائی جاتی تھیں۔	real
1007	حزب اختلاف کی جماعتوں کا سیاسی اتحاد پاکستان ڈیموکریٹک موومنٹ میں شامل جنرل (ریٹائرڈ) عبد القادر بلوچ کیا مسلم لیگ ن کے قائد میاں نواز شریف کی جانب سے فوج کی اعلیٰ قیادت کو تنقید کا نشانہ بنانے پر ناراض ہیں یا اس کی وجہ کچھ اور ہی ہے؟	real
1008	امریکی صدر ڈونلڈ ٹرمپ نے اپنے دور صدارت میں نو ایسی ٹویٹس پوسٹ کی ہیں جن میں پاکستان کا ذکر ہے، اور ان میں سے ایک ایسی ہے جو پوسٹ کرنے کے بعد ڈیلیٹ کردی گئی تھی۔ اس کے علاوہ انھوں نے پچاس بار مختلف موقعوں پر پاکستان کا ذکر کیا ہے۔	real
1009	آج سے ٹھیک 91 برس قبل پنجاب کے شہر میانوالی کی جیل میں ہندو ناشر راج پال کو مبینہ توہین رسالت کے باعث قتل کرنے کے الزام کے تحت علم الدین کو سزائے موت دے دی گئی تھی۔ لیکن کیا عام خیال کے برعکس انھوں نے عدالت کے روبرو صحتِ جرم سے انکار کیا تھا؟	real
1010	افغانستان کے بعض اہم رہنما حالیہ ہفتوں میں انڈیا آئے تھے۔ دوحہ میں طالبان اور افغان حکومت کے مابین بین افغان مذاکرات کے پس منظر میں ان دوروں کے مقاصد کیا ہیں؟	real
1011	پاکستان کی ہندو اور مسیحی اقلیتی برادریاں اپنی لڑکیوں کے مذہب کی جبری تبدیلی کی شکایت ایک طویل عرصے سے کرتی آ رہی ہیں مگر اب تک اس کی روک تھام کے لیے طریقہ کار پر اتفاق نہیں ہو سکا ہے۔	real
1012	عالمی سطح پر امریکہ، روس، یورپ اور چین کے پاس اپنے جیو انٹیلیجنس سیٹلائٹ کے نظام ہیں جن کی مدد سے وہ دنیا پر نظر رکھ سکتے ہیں۔ یہ چاروں ایک دوسرے سے سائنسی اور تکنیکی معلومات بانٹتے ہیں لیکن کوئی خاص معاہدہ نہ ہونے کی صورت میں فوجی راز نہیں شیئر کیے جاتے۔	real
1013	پاکستان میں ‘لو’ بسکٹ بنانے والی کمپنی کانٹینینٹل بسکٹ لیمیٹیڈ کے ایم ڈی حسن علی خان کا بی بی سی سے گفتگو کرتے ہوئے کہنا تھا کہ لو بسکٹ کا فرانس سے کوئی تعلق نہیں اور یہ بسکٹس پاکستان میں تیار کیے جاتے ہیں اور انھیں کسی اور ملک سے درآمد نہیں کیا جاتا۔	real
1014	انڈین میڈیا نے اس واقعے کو اس کے اصل سیاق و سباق سے مکمل طور پر ہٹ کر پیش کیا۔ انڈیا میں پاکستان میں ہونے والے بہت سے اور واقعات کو بھی غلط طور پر پیش کیا جاتا ہے۔	real
1015	سوشل میڈیا پر شیئر کی جانے والی ویڈیوز میں ان اہلکاروں سے کیے جانے سوالات اور مجمعے کی جانب سے نعرے بازی کے باعث اکثر افراد کا خیال تھا کہ یہ مبینہ طور پر پاکستان کے کسی خفیہ ادارے کے اہلکار ہیں جو کسی شہری کو جبری طور پر حراست میں لینے آئے ہیں۔	real
1016	اسلام آباد انتظامیہ کے مطابق ریلی میں دو سے ڈھائی سو لوگ شامل تھے جنھوں نے پولیس سے فرانس کے سفارتخانے کے سامنے احتجاج کرنے کی اجازت مانگ رکھی تھی، جو پولیس نے مسترد کردی تھی، جب ریلی نے مزید آگے بڑھنے کی کوشش کی تو پولیس نے انھیں منتشر کرنے کے لیے شیلنگ شروع کر دی۔	real
1017	اسلام آباد میں جمعے کو منعقد ہونے والی میلاد کانفرنس کے دوران پاکستان کے وزیراعظم عمران نے کہا کہ مغرب میں لوگ پیغمبرِ اسلام سے متعلق مسلمانوں کے جذبات سمجھ نہیں پاتے اور اسلاموفوبیا کا سب سے بڑا نقصان وہاں ہے جہاں مسلمان اقلیت میں ہیں۔	real
1018	پاکستان میں قومی بچت کی سکیموں میں واضح کمی آئی ہے جس کی وجہ ماہرین کے مطابق شرح منافع میں کمی کے علاوہ ایف اے ٹی ایف کی شرائط کو پورا کرنے کے لیے کیے جانے والے اقدامات بھی ہیں۔	real
1019	پاکستان کی حکومت کا کہنا ہے کہ امریکی جیل میں قید پاکستانی شہری عافیہ صدیقی نے رحم کی اپیل پر دستخط کر دیے ہیں اور ان کی اپیل امریکی جیل حکام کے ذریعے امریکی صدر کو بھجوا دی گئی ہے۔	real
1020	پاکستان میں حکام کی جانب سے حالیہ دنوں میں ملک میں کورونا وائرس کی دوسری لہر آنے کے خدشے کا بارہا اظہار کیا گیا ہے اور اب اعداد و شمار بھی بظاہر ان خدشات کی تصدیق کرتے دکھائی دے رہے ہیں۔	real
1021	غیر سرکاری تنظیم سحر کے مینیجر برائے چائلڈ پروٹیکشن بہرام لہڑی نے بتایا کہ انہوں نے حکومت کی جانب سے قائم کردہ چائلڈ پروٹیکشن یونٹ سے چند روز قبل بچوں کے ساتھ زیادتی کے جو اعداد و شمار حاصل کیے ان کے مطابق رواں سال رپورٹ کیے گئے کیسز کی تعداد 25 ہے۔	real
1022	پاکستان مسلم لیگ ن کے رہنما ایاز صادق کے بھارتی پائلٹ ابھینندن کی رہائی کے بارے میں قومی اسمبلی کے ایوان میں دیئے گئے بیان پر شروع ہونے والا تنازع شدت اختیار کرتا جا رہا ہے۔ پاکستانی فوج کے ترجمان میجر جنرل بابر افتخار نے کہا ہے کہ ’ایک ایسا بیان دیا گیا جس کے ذریعے قومی سلامتی سے منسلک ملکی تاریخ کو مسخ کرنے کی کوشش کی گئی۔‘	real
1023	وفاقی وزیر فواد چوہدری کا قومی اسمبلی میں پلوامہ حملے پر بیان انڈین میڈیا پر بار بار نشر کیا جا رہا ہے جس میں وہ کہہ رہے ہیں کہ ’ہم نے ہندوستان کو گھس کر مارا ہے، پلوامہ میں جو ہماری کامیابی ہے وہ عمران خان کی قیادت میں اس قوم کی کامیابی ہے‘ تاہم پاکستانی تجزیہ کاروں کے مطابق انڈین میڈیا اس بیان کی غلط تشریح کر رہا ہے۔	real
1024	یورپی پارلیمان کی رکن ڈومینیک بِلڈے نے الزام عائد کیا ہے کہ پاکستان ایک ایسا ملک ہے جو ناصرف یورپی یونین کے پاسپورٹس کی فروخت میں ملوث ہے بلکہ مجرمانہ سرگرمیوں میں شامل افراد کو ویزے بھی جاری کرتا ہے۔	real
1025	پاکستان فیڈرل بورڈ آف ریونیو (ایف بی آر) نے پاکستان کی سب سے بڑی ٹیلی کام کمپنی جاز (سابقہ موبی لنک) پر 25 ارب روپے کے ٹیکس نادہندہ ہونے کا الزام عائد کرتے ہوئے وفاقی دارالحکومت میں ان کے دفتر کو سیل کر دیا ہے۔	real
1026	سفارتی حلقوں میں کئی مہینوں سے یہ بازگشت جاری ہے کہ پاکستان کے خارجہ تعلقات میں ایک ’پالیسی شفٹ‘ آئی ہے اور اب اسلام آباد سعودی عرب کے مقابلے میں ترکی کو فوقیت دے رہا ہے۔	real
1027	وفاقی دارالحکومت اسلام آباد کی انسدادِ دہشت گردی کی ایک عدالت نے وزیر اعظم عمران خان کو سنہ 2014 میں سرکاری ٹیلی ویژن (پی ٹی وی) اور پارلیمان پر حملے کے مقدمے میں بری کر دیا ہے۔	real
1028	آج دنیا بھر میں انٹرنیشنل انٹرنیٹ ڈے منایا جا رہا ہے اور اس موقعے پر آزادیِ اظہارِ رائے پر کام کرنے والے ادارے فریڈم نیٹ ورک کی شائع ہونے والی رپورٹ پاکستان کا ایک تاریک منظر پیش کر رہی ہے۔	real
1029	پاکستان میں نوجوانوں کو اکثر اس سوال کا سامنا رہتا ہے کہ وہ اگر اپنی بچت کردہ رقم میں اضافہ چاہتے ہیں تو سرمایہ کاری کہاں کریں۔	real
1030	عمران خان نے کہا کہ پاکستان کے طبی عملے نے نہایت قابلِ فخر انداز میں کورونا کی پہلی لہر کا مقابلہ کیا لیکن اب دوسری لہر کے اشارے مل رہے ہیں۔	real
1031	پاکستانی حکام نے اسلام آباد ہائی کورٹ کو بتایا ہے کہ ان پانچ انڈین قیدیوں کو رہا کر کے واپس انڈیا بھیج دیا گیا ہے جنھوں نے فوجی عدالت سے ملنے والی سزا پوری کر لی تھی۔	real
1032	لاہور کے دو مختلف علاقوں میں فائن لیونگ کے نام سے موجود دکان میں روز مرہ کی ضرورت کی تمام اشیا باآسانی دستیاب ہوتی ہیں جہاں دکان مالکن شبانہ حمید ضرورت مند خاندانوں کو قسطوں پر راشن فراہم کرتی ہیں۔	real
1033	25 سیکنڈ کی اس ویڈیو میں دیکھا جا سکتا ہے کہ ملزم کو ہتھکڑی لگی ہے جبکہ اس سے صرف دو قدم کے فاصلے پر ایک پولیس اہلکار بھی کھڑا ہے لیکن ملزم کیمرے کی جانب دیکھ کر بار بار اپنی مونچھوں کو تاؤ دے رہا ہے اور آگے کھڑا پولیس اہلکار اس سے بالکل بے خبر ہے۔	real
1034	پاکستان تحریک انصاف کی حکومت نے وزیر اعظم پاکستان اور صدر مملکت سمیت دیگر وزرا کو بیرون ممالک دوروں کے دوران ملنے والے تحائف کی نیلامی کا فیصلہ کیا ہے۔	real
1035	ماہ اکتوبر کے آخری دنوں کے آتے آتے پاکستان میں بھی بہت کچھ تبدیل ہوا، مارشل لا لگا اور ایوب خان اس کے ناظم اعلیٰ بنائے گئے اور وزرات عظمیٰ کا منصب بھی اُن ہی کی بھاری بھر کم شخصیت میں سما گیا۔	real
1036	پاکستان میں صوبہ پنجاب کے دارالحکومت لاہور کی ایک احتساب عدالت نے منی لانڈرنگ کیس میں پاکستان مسلم لیگ نواز کے سربراہ شہباز شریف ان کے بیٹے حمزہ شہباز اور دیگر کے جوڈیشل ریمانڈ میں دو نومبر تک توسیع کر دی ہے۔	real
1037	سی سی پی او پشاور کے مطابق دھماکہ صبح ساڑھے آٹھ بجے ہوا جب بچے قرآن کی تلاوت کر رہے تھے۔ ان کے مطابق ابتدائی تحقیقات سے لگتا ہے کہ پانچ سے چھ کلو دھماکہ خیز مواد استعمال کیا گیا جسے ایک بیگ میں رکھا گیا تھا۔	real
1038	پاکستان مسلم لیگ ن کے سینیئر رہنما اور سابق وزیراعظم نواز شریف کے قریبی ساتھی اسحاق ڈار نے بی بی سی کو بتایا ہے کہ وزیراعظم عمران خان اور پاکستانی حکومت کی تمام تر کوششوں کے باوجود، میاں نواز شریف کو برطانیہ سے پاکستان نہیں لے جایا سکتا۔	real
1039	میدانِ سیاست میں زیرک سیاست دان اپنی ٹائمنگ کے اعتبار سے میچ خود مقرر کر رہے ہیں۔۔ کب، کہاں، کتنا سکور کرنا ہے یہ بھی خود طے کر رہے ہیں۔ اصل امتحان اب اہل اختیار کا ہے کہ کھیل کھل کر کھیلنے دیں گے یا پچ ہی اُکھاڑیں گے۔	real
1040	انڈینز اور پاکستانی اکثر اپنے ممالک کے مابین کشیدہ تعلقات کی وجہ سے ایک دوسرے کے مخالف ہوتے ہیں۔ لیکن امریکہ میں دونوں ممالک کے لوگ ایک ہی خطے جنوبی ایشیا کے باشندے ہیں اور اکثر سیاسی مہموں کے دوران مل کر کام کرتے ہیں۔	real
1041	کوئٹہ میں اتوار کے روز پی ڈی ایم کے جلسے میں مریم نواز نے لاپتہ افراد کے معاملے پر بات کی ہے جس کے بارے میں لواحقین کا کہنا ہے کہ انھیں اس سے نئی امید ملی ہے۔	real
1042	سپریم کورٹ میں جمع کرائی گئی جی آئی ٹی رپورٹ کے مطابق موجودہ فوٹیج ’غیر معیاری‘ ہے جس میں گاڑیوں کے نمبرز بھی معلوم نہیں ہو سکے۔	real
1043	پاکستانی ٹیم کی لکھنؤ ٹیسٹ میں جیت کے دو مرکزی کردار تھے، اوپنر نذر محمد اور میڈیم فاسٹ بولر فضل محمود ۔ یہ دونوں یک جاں دو قالب تھے۔	real
1044	پاکستان میں کوئی بھی شخص جب اپنا کاروبار شروع کرنے کا ارادہ کرتا ہے تو سب سے پہلے اس کے ذہن میں یہ سوال آتا ہے کہ وہ اس کے لیے پیسہ یا سرمایہ کہاں سے لائے۔ ایک طریقہ وینچر کیپٹیل ازم ہے، جس کے بارے میں فی الحال بہت سے پاکستانی لاعمل ہیں لیکن ترقی یافتہ ممالک میں یہ طریقہ خاصا مقبول اور عام ہے۔	real
1045	کیا پاکستان میں سربراہ ریاست یعنی صدرِ پاکستان کا دفتر محض ایک ڈاکخانہ ہے؟ عدالت عالیہ کی جانب سے سپریم کورٹ کے جج جسٹس قاضی فائز عیسیٰ کیس میں تفصیلی فیصلہ آنے کے بعد یہ سوال انتہائی اہمیت اختیار کر گیا ہے اور زبانِ زد و خاص و عام ہے۔	real
1046	فرانس نے مشرقِ وسطیٰ کے ممالک سے فرانسیسی مصنوعات کا بائیکاٹ ختم کرنے کی اپیل کی ہے۔ فرانسیسی مصنوعات کے بائیکاٹ سے متعلق مہم دراصل صدر ایمانویل میکخواں کے پیغمبرِ اسلام کے خاکے شائع کرنے کے دفاع کے باعث ہے۔	real
1047	کوئٹہ میں گذشتہ 30 سال سے جلسوں کی کوریج کرنے والے اے ایف پی سے وابستہ سینئر فوٹو جرنلسٹ بنارس خان کا کہنا ہے کہ لوگوں کی شرکت کے حوالے سے یہ کوئٹہ کی تاریخ کےبڑے جلسوں میں سے تھا۔	real
1048	عمران خان نے فیس بک کے سربراہ مارک زکربرگ کے نام خط میں کہا ہے کہ وہ ان کی توجہ فیس بک پر موجود ایسے اسلام مخالف مواد کی طرف دلانا چاہتے ہیں جو عالمی سطح پر نفرت، شدت پسندی اور پُرتشدد واقعات میں اضافے کا باعث بن رہا ہے۔	real
1049	افغانستان کے حکام کے مطابق سنیچر کو دشت برچی کے علاقے میں واقع تعلیمی مرکز کی عمارت میں پیش آنے والے خودکش حملے میں کم از کم 24 افراد ہلاک اور درجنوں زخمی ہوئے ہیں۔	real
1050	متحدہ اپوزیشن کے کوئٹہ جلسے سے خطاب کرتے ہوئے سابق وزیر اعظم نواز شریف نے کہا کہ ’فوج آپ کی ہے، اسے عزت دی جائے مگر جہاں معاملہ آئین کی پاسداری کا آجائے تو پھر کوئی سمجھوتہ نہ کریں۔‘	real
1051	ففتھ جنریشن وار کے لیے روبوٹکس کا ایک کارخانہ بن گیا۔ روبوٹک حزبِ اقتدار و حزبِ اختلاف پر مشتمل ہر روبوٹ جانتا ہے کہ کتنے قدم چلنا ہے، کیا کرنا یا کیا نہیں کرنا اور کس کی ہدایت پر کتنا عمل کرنا ہے۔ وسعت اللہ خان کا کالم	real
1052	پشتون تحفظ موومنٹ کے رہنما اور رکن قومی اسمبلی محسن داوڑ نے ایک ٹویٹ کے ذریعے بتایا ہے کہ وہ بذریعہ روڈ اسلام آباد پہنچ گئے ہیں۔	real
1053	دنیا کی بہترین فضائی کمپنیوں میں شمار ہونے والی ایئرلائن ایمریٹس نے دنیا میں ہوائی سفر اور آسائش کے تصور کو یکسر بدل دیا اور اس کام میں اس کی مدد کرنے والوں میں پاکستان کی قومی فضائی کمپنی پی آئی اے اور اس کے پائلٹس سرِفہرست تھے۔	real
1054	منی لانڈرنگ اور دہشت گردوں کی مالی امداد کی روک تھام کے عالمی ادارے فناشنل ایکشن ٹاسک فورس (ایف اے ٹی ایف) نے جہاں یہ تسلیم کیا ہے کہ پاکستان کی جانب سے اب تک سفارشات کی تکمیل کے لیے پیشرفت کی گئی ہے وہیں یہ اب وہ دوسرے مرحلے میں اس بات کو بھی دیکھے گا کہ پاکستان ان اقدامات کو نافذ کر رہا ہے یا نہیں۔	real
1055	پاکستان جیسے ملک میں جہاں قلفی کی ریڑھی سے لے کر ٹرک تک ہماری حس لطیف کے گواہ ہیں وہاں یہ فلم، تھیٹر، ریڈیو اور اب لگتا ہے کہ کیبل ٹی وی بھی رخصت ہونے والے ہیں۔ایسا کیوں ہوا؟ پڑھیے آمنہ مفتی کا کالم۔	real
1056	وزیر اعظم عمران خان کا ایک حالیہ انٹرویو ان کے جوابات سے زیادہ صحافیوں کی جانب سے پوچھے گئے سوالات اور ان کی ذاتی رائے کی بنا پر سوشل میڈیا پر لوگوں کی توجہ حاصل کر رہا ہے۔	real
1057	گذشتہ شام کراچی کے علاقے سچل سے لاپتہ ہونے والے نجی نیوز چینل 'جیو' سے منسلک صحافی علی عمران سنیچر کی شام اپنی والدہ کے گھر بخیریت پہنچ گئے ہیں جس کی تصدیق ان کے بھائی نے کی ہے۔	real
1058	شبلی فراز اور شیریں مزاری دونوں کو ہی اپنی ٹویٹس پر آڑھے ہاتھوں لیا گیا اور کئی لوگ یہ سوال کرتے ہوئے دکھائی دیے کہ وفاقی حکومت میں ہوتے ہوئے وزرا اس معاملے پر اتنی بے بس ٹویٹس کیوں کر رہے ہیں؟	real
1059	جسٹس قاضی فائز عیسیٰ کے خلاف صدارتی ریفرنس خارج کیے جانے کا تفصیلی فیصلہ آنے کے بعد پاکستان کے سوشل میڈیا پر جسٹس فائز عیسیٰ کا نام ٹرینڈ کر رہا ہے اور کئی صارفین صدر پاکستان اور وزیر قانون سے استعفے کا مطالبہ کر رہے ہیں۔	real
1060	پاکستان کے ایک نجی ٹی وی چینل اے آر وائی نیوز کو انٹرویو دیتے ہوئے وزیراعظم عمران خان کا کہنا تھا کہ 'اس وقت ہم برطانوی حکومت سے نواز شریف کی وطن واپسی کے متعلق بات کر رہے ہیں کیونکہ وہ جھوٹ بول کر ملک سے گئے ہیں۔'انھوں نے کہا کہ 'ہماری پوری کوشش ہے کہ اس کو ڈی پورٹ کروایا جائے۔‘	real
1061	جسٹس قاضی فائز عیسیٰ کے خلاف صدارتی ریفرنس خارج کیے جانے کا دو سو چوبیس صفحات پر مشتمل تفصیلی فیصلہ جسٹس عمر عطا بندیال نے تحریر کیا ہے جو کہ جمعے کی شام جاری کیا گیا۔ عدالت نے کہا ہے کہ سنی سنائی باتوں پر ریفرنس دائر نہیں کیا جاسکتا بلکہ اس کے لیے ٹھوس شواہد چاہیں جو کہ اس ریفرنس میں موجود نہیں تھے۔	real
1062	فنانشل ایکشن ٹاسک فورس نے پاکستان کو فروری 2021 تک بدستور زیرِ نگرانی ممالک کی گرے لسٹ میں رکھنے کا فیصلہ کیا ہے۔ ادارے کے سربراہ کے مطابق پاکستان سفارشات پر عمل کر رہا ہے مگر اسے مزید کام کرنے کی ضرورت ہے۔	real
1063	اٹارنی جنرل آف پاکستان نے سندھ ہائی کورٹ کو یقین دہانی کرائی ہے کہ بنڈال اور ڈنگی جزائر سندھ کی ملکیت ہیں اور عدالت میں دائر درخواست پر فیصلے تک ان پر کسی نوعیت کی سرگرمی عمل میں نہیں لائی جائے گی۔	real
1064	پاکستان مسلم لیگ ن کی نائب صدر مریم نواز کے شوہر کیپٹن صفدر کی گرفتاری سے متعلق گذشتہ روز ایک نئی سی سی ٹی وی فوٹیج سامنے آنے کے بعد سے سوشل میڈیا پر ایک نئی بحث چھڑ گئی ہے۔	real
1065	سپریم کورٹ نے قومی احتساب بیورو کے ملزمان کی طویل حراست کا نوٹس لیتے ہوئے کہا ہے کہ نیب مقدمات میں ملزمان کو طویل عرصہ حراست میں رکھنا نا انصافی ہو گی۔	real
1066	پیدائش کے وقت کچھ بچوں کے مخصوص اعضا میں نقص ہوتا ہے۔ عابد اور مراد بھی ایسے ہی ایک مسئلے کا شکار تھے جنھیں اسلام آباد کے ایک سرکاری ہسپتال میں کامیاب آپریشن کے بعد ٹھیک کر دیا گیا ہے۔	real
1067	سنہ 1971 میں امریکی وزیر خارجہ ہنری کسنجر نے چین کا ایک خفیہ لیکن تاریخ ساز دورہ کیا تھا۔ اُس وقت پاکستان گھمبیر سیاسی بحران میں گھرا ہوا تھا اور امریکہ سرد جنگ کے اُس زمانے میں چین اور سویت یونین کے درمیان پیدا ہونے والی نظریاتی اور تزویراتی خلیج کا فائدہ اٹھانا چاہتا تھا۔	real
1068	نثار احمد نے انڈیا کے زیر انتظام کشمیر واپس لوٹنے سے قبل ایک پاکستانی خاتون سے شادی کر لی تھی۔ وہ سنہ 1990 کی دہائی میں اسلحے کی تربیت حاصل کرنے پاکستان چلے گئے تھے۔	real
1069	پاکستان کے صوبہ سندھ کے محکمہ داخلہ نے مسلم لیگ ن کے سربراہ میاں نواز شریف کے داماد اور مریم نواز کے شوہر کیپٹن (ر) صفدر کے خلاف مقدمے اور پولیس کی اعلیٰ قیادت سے بدسلوکی اور توہین کی تحقیقات کے لیے وزارتی کمیٹی کا نوٹیفیکیشن جاری کر دیا ہے۔	real
1070	ڈاکٹر عاطِف میاں کو کراچی کے ایک بڑے تعلیمی ادارے انسٹی ٹیوٹ آف بزنس ایڈمنسٹریشن (آئی بی اے) کی انتظامیہ نے پانچ نومبر کو ہونے والے زوم سیمینار میں مذہبی حلقوں کی جانب دھمکیوں کے بعد شرکت سے منع کر دیا ہے۔	real
1071	بدھ کو این سی او سی کے ہونے والے اجلاس میں ملک کے ٹرانسپورٹ سیکٹر، بازار، شادی ہالز، ریستوران اور عوامی اجتماعات کو ’ہائی رسک' قرار دیا گیا اور وفاق نے صوبائی حکام کو تاکید کی کہ وہ وائرس کے پھیلاؤ کو روکنے کے لیے مؤثر اقدامات اٹھائیں۔	real
1072	پاکستان میں مختلف مقدمات میں مطلوب سابق وزیر اعظم میاں نواز شریف کو برطانیہ سے تحویل میں لینے کے لیے حکومت پاکستان نے برطانوی حکومت سے رابطے تیز کر دیے ہیں اور تین خطوں کے علاوہ سفارتی سطح پر رابطے اور متعدد ٹیلی فون کالز بھی ہو چکی ہیں۔	real
1073	پاکستان کے دفتر خارجہ نے ایسی خبروں کی تردید کرتے ہوئے انھیں ’بے بنیاد‘ اور ’فیک‘ قرار دیا ہے۔ دفتر خارجہ کا کہنا ہے کہ پاکستان اور سعودی عرب میں گہرے باہمی تعلقات ہیں اور اہم معاملات پر ہمیشہ دونوں ممالک نے ایک دوسرے کو سپورٹ کیا ہے۔	real
1074	جب اس خبر کی تردید سے بھی کچھ فرق نہ پڑا تو ٹوئٹر پر پاکستانی صارفین نے اپنی حکمت عملی تبدیل کی اور اس ہیش ٹیگ کو ’ہائی جیک‘ کر لیا، یعنی اسے اتنا استعمال کیا کہ غیر مصدقہ معلومات دب گئیں اور ہر طرف مزاحیہ مواد نظر آنے لگا۔	real
1075	معاشی تجزیہ کار اسے کسی حد تک تو حکومت کی کامیابی قرار دیتے ہیں تاہم اسے ملک کی مجموعی اقتصادی صورتحال کا پیمانہ نہیں مانتے۔دوسری جانب پاکستان مسلم لیگ نواز نے وزیر اعظم کےدعوے کو ان کی معیشت کی ساخت سے ’ناواقفیت‘ کہا ہے اور اسے دراصل معیشت کے لیے ’خطرناک‘ قرار دیا ہے۔	real
1076	پاکستان میں گیس کے باقی ذخائر کے بارے میں وزیراعظم کے خصوصی مشیر برائے پیٹرولیم ندیم بابر نے کہا کہ اگر ملک میں کوئی نئے بڑے ذخائر دریافت نہیں ہوتے تو آئندہ بارہ سے چودہ سال میں گیس ختم ہو جائے گی۔	real
1077	پاکستان میں نوجوانوں اور خواتین کے لیے بینک سے قرض حاصل کرنا کتنا مشکل ہے اور ایسا کرتے ہوئے کن باتوں کا دھیان رکھنا چاہیے، یہ جاننے کے لیے بی بی سی نے اس رپورٹ میں بینکنگ کے شعبے سے وابستہ چند ماہرین سے بات کی ہے۔	real
1078	وزیر اعلیٰ سندھ سید مراد علی شاہ نے سندھ اسمبلی کے اجلاس سے خطاب کرتے ہوئے دعویٰ کیا ہے کہ پاکستان مسلم لیگ (ن) کے رہنما کیپٹن (ر) صفدر کی گرفتاری اور اس سے متعلق معاملات میں ان کو حکومت کے خاتمے کی دھمکی دی گئی تھی۔	real
1079	پاکستان کے سب سے بڑے شہر کراچی میں ایک عمارت میں دھماکے کے نتیجے میں کم از کم پانچ افراد ہلاک اور 25 سے زائد زخمی ہوگئے ہیں دھماکے کی نوعیت اور ساخت کا اندازہ نہیں لگایا جاسکا ہے۔	real
1080	تاریخی طور پر غدار ہونے کے لیے یہ شرط تھی کہ آپ پنجابی نہ ہوں۔ کبھی کبھی کوئی پپو غدار پیدا ہو جاتا تھا تو اس کے ساتھ سلوک بھی پپوؤں والا کیا جاتا تھا۔ لندن سے جدہ، جدہ سے لندن وغیرہ۔ اگر وہی بات کوئی بزرگ بلوچ بھی کرے تو اس غار میں گھس کر مارا جاتا تھا: پڑھیے محمد حنیف کا کالم	real
1081	اسلام آباد ہائی کورٹ کے چیف جسٹس اطہر من اللہ نے بدھ کے روز چار انڈین قیدیوں کی رہائی کے بارے میں پاکستان میں انڈین ہائی کمیشن کی جانب سے دائر کی گئی درخواست کی سماعت کی جہاں انھوں نے وفاق سے سوال کیا کہ اگر ان قیدیوں نے اپنی سزائیں پوری کر لی ہیں انہیں رہا کیوں نہیں کیا جا رہا؟	real
1082	ماضی میں بھی شاید پولیس کے بارے میں ہیش ٹیگز ٹرینڈ کرتے رہے ہوں گے لیکن تب پولیس کی اچھی یا بری کارکردگی یا کوئی تنازع زیر بحث آتا تھا لیکن اس مرتبہ معاملہ پولیس اور اسٹیبلشمنٹ کے درمیان واضح اختلافات کا ہے۔	real
1083	ایف اے ٹی ایف کے 21 سے 23 اکتوبر تک ہونے والے اجلاس میں پاکستان کی منی لانڈرنگ اور ٹیرر فنانسنگ پر ہونے والی اب تک کی پیشرفت کو دیکھتے ہوئے آگے کا لائحہ عمل طے کیا جائے گا کہ کیا پاکستان کو مزید کچھ عرصے کے لیے گرے لسٹ میں رکھا جائے یا نہیں؟	real
1084	پاکستان کے صوبہ سندھ کے انسپکٹر جنرل آف پولیس مشتاق مہر نے اپنے ساتھ پیش آنے والے مبینہ واقعے کے بعد احتجاجاً چھٹی پر جانے کا اپنا اقدام مؤخر کرتے ہوئے سندھ پولیس کے افسران سے بھی کہا ہے کہ وہ بھی انکوائری مکمل ہونے تک اپنی چھٹی کی درخواستیں دس دن کے لیے ملتوی کر دیں۔	real
1085	پنجاب پولیس نے 16 اکتوبر کو اپوزیشن کے گوجرانوالہ جلسے کے منتظمین کے خلاف اپنی مدعیت میں تعزیراتِ پاکستان کی دفعہ 440، 147، اور 149، پنجاب کے آرڈیننس برائے انسدادِ متعدی امراض 2020 اور پنجاب ساؤنڈ سسٹمز ریگولیشنز ایکٹ 2015 کے تحت مقدمہ درج کیا ہے۔	real
1086	پاکستان پیپلز پارٹی کے چیئرمین بلاول بھٹو زرداری نے آرمی چیف جنرل قمر جاوید باجوہ سے مطالبہ کیا ہے کہ وہ مسلم لیگ نواز کے رہنما کیپٹن ریٹائرڈ صفدر کے خلاف ایف آئی آر کے اندارج اور ان کی گرفتاری سے پہلے آئی جی سندھ سے متعلق مبینہ واقعے کا نوٹس لیں اور اس معاملے کی انکوائری کروائیں۔	real
1087	پاکستان میڈیکل کمیشن کے قانون کے مطابق رواں برس پہلی بار پورے ملک میں طلبہ ایک ہی انٹری ٹیسٹ دیں گے تاہم امتحانات سے محض ایک ماہ پہلے نیا نصاب جاری کرنے پر طلبہ کی جانب سے سخت رد عمل سامنے آیا ہے۔	real
1088	لگ بھگ دو سو برس پہلے مائی جیواں پر لگنے والی پابندی کے بعد کسی خاتون نے شاہ عبدالطیف بھٹائی کی درگاہ پر اُن کا کلام نہیں گایا مگر سنہ 2017 میں چشم فلک نے یہ نظارہ دیکھا کہ شاہ سائیں کا کلام اُن کی راگی لڑکیاں اُن کی درگاہ میں گا رہی ہیں۔	real
1089	سپریم کورٹ نے نجی ہاؤسنگ سوسائٹی بحریہ ٹاؤن سے ان کے کراچی میں تعمیر کیے جانے والے منصوبے کے حوالے سے حاصل ہونے والے اربوں روپے استعمال کرنے سے متعلق وفاق اور سندھ حکومت کی درخواستوں کو مسترد کر دیا ہے اور اس رقم کو صوبہ سندھ میں ترقیاتی منصوبوں پر خرچ کرنے کے لیے ایک گیارہ رکنی کمیشن تشکیل دیا ہے۔	real
1090	بعض سیاسی مبصرین کا کہنا ہے کہ اس پابندی کا مقصد یہ تاثر ابھارنا ہے کہ گلگت بلتستان کے انتخابات میں فوج غیرجانبدار ہے۔	real
1091	بھٹو صاحب اور میاں نواز شریف میں یہ قدر مشترک ہے کہ دونوں نے ’سیاسی پختگی‘ کے بعد اپنے راستے اسٹیبلشمنٹ سے جُدا کیے۔ بات بھٹو صاحب کو ذرا جلدی سمجھ میں آئی جبکہ میاں صاحب کو چند سال لگ گئے: پڑھیے عاصمہ شیرازی کا کالم۔	real
1092	مسلم لیگ ن کی رہنما مریم نواز نے ملک کے وزیراعظم عمران خان کی جانب سے خود کو نانی کہنے پر جواب میں کہا تھا کہ عمران خان نے ’مقدس رشتے کی تذلیل کی ہے‘۔ اس حوالے سے خواتین سیاسی رہنماؤں کی رائے۔	real
1093	قیام پاکستان سے اب تک جمہوریت کی علم بردار عالمی طاقت امریکہ کے پانچ صدور نے دورۂ پاکستان کے لیے ہمیشہ ایسے وقت کا انتخاب کیا جب اقتدار پر فوج قابض تھی۔	real
1094	کراچی کی ایک عدالت نے سابق وزیر اعظم نواز شریف کے داماد کیپٹن (ر) صفدر کی ضمانت منظور کر کے انھیں رہا کرنے کا حکم جاری کیا ہے۔ ان کے خلاف بانی پاکستان محمد علی جناح کے مزار پر نعرے بازی کرنے اور دھمکیاں دینے کے الزام میں مقدمہ درج کیا گیا ہے۔	real
1095	پاکستانی حکام نے مختصر دورانیے کی ویڈیوز ایپ ٹک ٹاک عائد پابندی کو ختم کرتے ہوئے اس ایپ کو ملک میں مشروط طور پر بحال کرنے کا اعلان کیا ہے۔	real
1096	پاکستان محمد علی جناح کے مزار کو قومی ورثہ قرار دیا گیا ہے اور اِس کو نقصان پہنچانے اور یہاں کسی قسم کی سیاسی سرگرمی منعقد کرنا قانوناً جرم ہے جس کی سزا تین سال قید تک ہو سکتی ہے۔	real
1097	یہ کیسا بازار ہے جہاں لالچ اور جلد بازی کے فیصلوں کے نتیجے میں آخر نقصان ہی ہوتا ہے لیکن سٹے بازی اور انسائڈر ٹریڈنگ کی گونج بھی سنائی دیتی ہے۔ جہاں صبر کی اہمیت سب سے زیادہ بتائی جاتی ہے لیکن متوسط طبقے کے افراد کے لیے جگہ بنانا بھی انتہائی مشکل ہے۔	real
1098	جناح باغ حالیہ سالوں میں سیاست کے نئے اکھاڑے کے طور پر ابھرا ہے۔ یہاں تحریک انصاف نے جلسے کیے، جمعیت علما اسلام نے 2012 میں ایک بڑا اجتماع کیا، مصطفیٰ کمال نے ایم کیو ایم سے راہیں الگ کرنے کے بعد یہاں جلسہ منعقد کر کے اپنی عوامی مقبولیت کا اظہار کیا، پاکستان پیپلز پارٹی نے بھی بلاول بھٹو کے لیے اسی مقام کا انتخابات کیا تھا۔ ماضی میں نشتر پارک اور ککری گراونڈ جلسہ گاہ کے لیے موزوں سمجھے جاتے تھے۔	real
1099	گلگت بلتستان انتظامیہ کے مطابق سکردو روڈ پر مسافر وین پر پہاڑی تودہ گرنے سے 14 افراد ہلاک ہو گئے ہیں۔ ہلاک شدگان میں فرنٹیئر ورکس آرگنائزیشن کے چھ اہلکاروں کے علاوہ ماں بیٹا اور دو سگے بھائی بھی شامل ہیں۔	real
1100	گیارہ جماعتی حکومت مخالف اتحاد، پی ڈی ایم گوجرانوالہ میں اپنے پہلے مشترکہ جلسے کے بعد کراچی کے جناح باغ میں جلسے کا انعقاد کر رہی ہے۔ جلسے کی میزبان پیپلز پارٹی کا کہنا ہے کہ سابق وزیراعظم میاں نواز شریف کے آن لائن خطاب کے لیے تیاریاں مکمل کر لی گئی ہیں۔	real
1101	حزبِ اختلاف کی موجودہ تحریک عمران حکومت کو کمزور تو کر سکتی ہے ختم نہیں کر سکتی۔ جیسے 2014 کے عمرانی دھرنے نے نواز شریف کو کمزور ضرور کیا مگر ختم نہیں کر سکا۔	real
1102	رنگت کی بنیاد پر تعصب کے خلاف متحرک ماڈل آمنہ الیاس سابق ماڈل آمنہ حق کو ماضی میں ایک شو کے دوران موٹا کہنے پر معذرت خواہ نہ ہونے پر سوشل میڈیا صارفین کی تنقید کی زد میں ہیں۔	real
1103	پرویز قریشی مہدی سنہ 1971 کی جنگ کے پہلے جنگی قیدی تھے اور انھیں فور سکھ رجمنٹ کے کیپٹن ایچ ایس پناگ نے جنگی قیدی بنایا تھا۔	real
1104	میاں صاحب نے صاف صاف نام لے کر بتا دیا کہ پچھلے تہتر برس سے سیاست کے ’اس رسوڑے میں کون تھا؟ جو ککر میں سے چنے نکال کے خالی ککر گیس پہ چڑھا دیا کرتا تھا۔‘ آمنہ مفتی کا کالم	real
1105	پاکستان میں سیمنٹ کی پیداوار اور فروخت کے کاروبار سے منسلک لکی سیمنٹ کی پیداوار اور فروخت میں حالیہ عرصے میں اضافہ دیکھنے میں آیا ہے۔	real
1106	پاکستان کسٹمز کے کلیکٹر محمد ساقف کا کہنا ہے کہ یہ پرندے ناپید ہونے والے جانور کی دہرست میں شامل ہیں اور انھیں افغانستان سے ’عرب ممالک‘ میں لے جایا جا رہا تھا۔	real
1107	سنہ 2007 میں جب سابق وزیر اعظم بینظیر بھٹو نو سالہ خودساختہ جلاوطنی ختم کر کے پاکستان آئیں تو کراچی میں ایک استقبالیہ ریلی میں ان پر حملہ کیا گیا۔ اس واقعے کی کوریج کرنے والے صحافیوں نے اس روز کیا دیکھا؟	real
1108	پاکستان کے وزیر اعظم عمران خان نے گذشتہ روز گوجرانوالہ میں ہونے والے حکومت مخالف اپوزیشن اتحاد کے جلسے کو 'سرکس' قرار دیتے ہوئے حزب اختلاف کے رہنماؤں پر شدید تنقید کی اور کہا کہ اب اپوزیشن کو ایک مختلف قسم کا عمران خان دیکھنے کو ملے گا اور چوروں اور ڈاکوؤں کو کوئی پروڈکشن آرڈر نہیں دیا جائے گا۔	real
1109	’ہمدرد فاؤنڈیشن پاکستان‘ کے بانی سربراہ، ممتاز سماجی شخصیت، سیاستدان اور پاکستان کے نامور طبیب حکیم محمد سعید 17 اکتوبر 1998 کو ایک حملے میں ہلاکت کے بعد مدینہ الحکمت میں دفن کر دیے گئے مگر اُن کے قتل سے متعلق شکوک و شبہات کبھی دفن نہیں ہو سکے۔	real
1110	گوجرانوالہ میں حزبِ اختلاف کے اتحاد پی ڈی ایم کے جلسے سے بذریعہ ویڈیو لنک خطاب کے دوران نواز شریف نے ملکی حالات پر بات کرتے ہوئے گذشتہ عام انتخابات میں مبینہ دھاندلی کے لیے پاکستانی فوج کے سربراہ کو ذمہ دار ٹھہرایا اور سوال کیا کہ سویلین حکومتوں کو ان کی مدت مکمل کرنے کیوں نہیں دی جاتی۔	real
1111	فوجی آمر ضیاالحق کے دور میں آئین میں آٹھویں ترمیم کر کے ملک میں رائج پارلیمانی نظام حکومت کو صدارتی نظام کی جانب لے جانے کی کوشش کی گئی اور بعدازاں اس آئینی ترمیم کا شکار ملک کے متعدد منتخب وزرائے اعظم بنے۔ یہ ترمیم کیسے اور کس کے کہنے پر منظور ہوئی پڑھیے اس تفصیلی رپورٹ میں۔	real
1112	متحدہ اپوزیشن کے گوجرانوالہ جلسے میں نواز شریف نے اپنی تقریر میں پاکستانی فوج کے سربراہ کا نام لے کر ان پر الزامات عائد کیے۔ اس پر سوشل میڈیا پر بحث جاری ہے لیکن سب متفق ہیں کہ یہ کوئی معمولی بیانات نہیں۔	real
1113	'پہلوانوں کے شہر' گوجرانوالہ میں جمعہ کے روز حزبِ اختلاف کی جماعتوں کے اتحاد پاکستان ڈیموکریٹک موومنٹ یعنی پی ڈی ایم کا پہلا جلسہ میلے کا سا سماں پیش کر رہا تھا۔	real
1114	ساٹھ کی دہائی میں صدر ایوب خان کا امریکہ میں زبردست استقبال دراصل امریکہ کی اس خطے میں سرد جنگ کی پالیسی کا حصہ تھا جس میں چاہے کوئی فوجی آمر ہو یا مطلق العنان بادشاہ، اگر وہ کمیونزم کے خلاف ہے تو وہ امریکی اتحادی ہوگا۔	real
1115	گوجرانوالہ کے ایک کالج کے باہر متعدد مشہور شخصیات کے ساتھ موجود ڈاکٹر عبدالسلام کی تصویر پر چند نوجوانوں کی جانب سے کالک ملنے کی ویڈیو سامنے آئی ہے جس پر سوشل میڈیا پر ردِ عمل دیکھنے میں آ رہا ہے۔	real
1116	پاکستان کے صوبہ خیبر پختونخوا میں ضم ہونے والے قبائلی علاقے ضلع خیبر میں فرنٹیئر روڈ پر افغانستان میں تعینات غیر ملکی افواج کے لیے سامان لے جانے والے ٹرالروں پر حملہ ہوا ہے جس سے ٹرالر اور ان پر لدی ہوئی گاڑیوں میں آگ بھڑک اٹھی تھی۔ ضلعی انتظامیہ اور پولیس کی جانب سے اس واقعے کے بارے میں کوئی بیان جاری نہیں کیا گیا۔	real
1117	پروفیسر منظور احمد گذشتہ روز لاہور میں 94 برس کی عمر میں انتقال کر گئے۔ انھوں نے لاہور کے شاہ حسین کالج کی بنیاد رکھی جس نے اگلی کئی دہائیوں کے لیے پاکستانی معاشرے اور سول سوسائٹی کو ایک لبرل بیانیہ دیا۔	real
1118	انڈیا میں حزب اختلاف کی جماعت کانگریس کے رہنما راہل گاندھی نے بی جے پی حکومت پر تنقید کرتے ہوئے کہا ہے کہ ’پاکستان اور افغانستان نے بھی کووڈ 19 کی روک تھام کے لیے ہم سے بہتر اقدامات کیے ہیں۔‘	real
1119	آج سے 69 برس قبل پاکستان کے پہلے وزیر اعظم لیاقت علی خان کو راولپنڈی میں ایک جلسہ عام کے دوران گولی مار کر ہلاک کر دیا گیا تھا تاہم لگ بھگ سات دہائیاں گزرنے کے باوجود یہ قتل اب بھی ایک معمہ ہے۔	real
1120	جب 1940 کی دہائی میں تین دوستوں نے جوتوں کا کاروبار شروع کیا تو ان کے پاس وسائل تھے نہ ہی ہنر مگر ایک قدر مشترک تھی کہ تینوں دوست ہی سرکاری نوکری کرنے کے خواہشمند نہیں تھے۔	real
1121	صوبہ بلوچستان اور خیبرپختونخوا میں سکیورٹی فورسز پر ہونے والے شدت پسندوں کے حملوں میں 14 سکیورٹی اہلکاروں سمیت 21 افراد ہلاک ہو گئے ہیں۔	real
1122	کراچی میں وفاقی تحقیقاتی ادارے ایف آئی اے نے ایک خاتون کو اپنے سابقہ بوائے فرینڈ کی نازیبا ویڈیو اور تصاویر شیئر کرنے کے الزام میں گرفتار کیا ہے۔	real
1123	جمعرات کو پی آئی اے نے ہدایت نامہ جاری کر دیا ہے، جس کے مطابق متحدہ عرب امارات پہنچنے والے مسافر کے پاس کم از کم دو ہزار درہم، واپسی کا کنفرم ٹکٹ اور کنفرم ہوٹل بکنگ بھی لازمی ہو گی۔	real
1124	انڈین حکام نے اسلام آباد ہائی کورٹ میں ایسے چار انڈین شہریوں کی رہائی کے لیے درخواست دائر کی ہے جنھیں پاکستان میں آرمی ایکٹ اور آفیشل سیکرٹ ایکٹ کے تحت سزائیں دی گئی تھیں اور وہ یہ سزا پوری کر چکے ہیں۔	real
1125	کراچی کے ایک سکول میں چوتھی جماعت کے طلبہ کو نہ صرف خلا سے متعلق سوالات کے جوابات مل گئے ہیں بلکہ یہ جوابات خلابازوں اور جرمن خلائی مرکز کی جانب سے دیے گئے ہیں۔ تاہم اس حوالے سے ان کا ردِ عمل سب سے دلچسپ ہے۔	real
1126	ان ملازمین کے مہنگائی ختم اور جبری برطرفیاں بند کرنے جیسے مطالبات کا جائزہ لینے سے قبل یہ جاننے کی کوشش کرتے ہیں کہ مختلف محکموں سے تعلق کے باوجود یہ ملازمین اپنے مطالبات لیے ایک ہی وقت میں کیسے ڈی چوک تک پہنچے۔	real
1127	پشاور ہائی کورٹ نے پاکستانی فوج کی حراست میں قید سماجی رہنما ادریس خٹک کے خلاف فوجی عدالت میں آفیشل سیکرٹ ایکٹ کے تحت جاری مقدمے کی کارروائی معطل کرنے کا حکم دیا ہے۔	real
1128	ملزم کے والد کی طرف سے مقامی ذرائع ابلاغ پر نشر کی جانے والے ایک ویڈیو بیان نے اس حوالے سے تضاد پیدا کر دیا ہے۔ ویڈیو میں انھوں نے دعویٰ کیا ہے کہ ملزم عابد ملہی کو پولیس نے گرفتار نہیں کیا بلکہ وہ خود گرفتاری کے لیے پیش ہوا۔	real
1129	مختلف سرکاری محکموں میں کام کرنے والے ہزاروں ملازمین نے منگل کو پارلیمنٹ ہاؤس کے سامنے جناح ایونیو پر دھرنا دے دیا اور ان میں سے زیادہ تعداد لیڈی ہیلتھ ورکرز کی ہے۔	real
1130	اقوامِ متحدہ کی انسانی حقوق کونسل میں پاکستان کے دوبارہ منتخب ہونے کو بعض ماہرین ایک بڑی سفارتی کامیابی قرار دے رہے ہیں تو بعض کے مطابق اس کی کوئی خاص اہمیت نہیں ہے۔ جبکہ پاکستان کی حکومت کا کہنا ہے کہ اس سے پاکستان کو مسئلہِ کشمیر کو اجاگر کرنے کا موقع ملے گا۔	real
1131	جب انڈین صحافی کرن تھاپر کا پاکستان کے قومی سلامتی کےمشیر معید یوسف کا انٹرویو انڈیا پاکستان کی ’ہار جیت‘ بن گیا۔	real
1132	بھاری جسامت دیکھ کر کوئی بھی انھیں کرکٹر ماننے کو تیار نہیں ہوتا مگر ان کی دبنگ بیٹنگ دیکھ کر سب دنگ رہ جاتے ہیں۔	real
1133	حکومت بار بار اعلان کرتی ہے کہ ہم کسی کو بھی مقررہ سے زیادہ قیمت پر کوئی چیز فروخت کرنے کی اجازت نہیں دیں گے۔ تو پھر سوال یہ ہے کہ آخر اس مہنگائی کا اصل ذمہ دار ہے کون؟	real
1134	ایبٹ آباد میں پشاور ہائی کورٹ نے گذشتہ سال شمالی وزیرستان میں خڑ قمر چیک پوسٹ پر ہونے والے واقعے کی ایف آئی آر کو شواہد نہ ہونے کی بنا پر خارج کر دیا ہے جس میں ممبران قومی اسمبلی علی وزیر اور محسن داوڑ کو نامزد کیا گیا تھا۔	real
1135	ماہرین کے مطابق پاکستان میں سرمایہ کاری کے لیے ترغیب دینے والی سکیموں کی ناکامی کی سب سے بڑی وجہ ملک میں ضروری سازگار ماحول کی کمی ہے، ایسا ماحول جو سرمایہ کاروں کو اعتماد دلا سکے کہ ان کا سرمایہ محفوظ رہے گا۔	real
1136	وزیراعظم عمران خان کے معاون خصوصی برائے قومی سلامتی ڈاکٹر معید یوسف نے انڈین صحافی کرن تھاپر کو منگل کو تفصیلی انٹرویو دیتے ہوئے انکشاف کیا ہے کہ انڈیا نے کشمیر پر پاکستان کو مذاکرات کا پیغام بھیجا ہے۔ کرن تھاپر نے کہا کہ انڈیا کی جانب سے گذشتہ اپنے زیر انتظام کشمیر کی خصوصی حیثیت ختم کیے جانے کے بعد کسی بھی پاکستانی سینئر عہدیدار کا یہ کسی بھی انڈین میڈیا کے ساتھ یہ پہلا انٹرویو ہے۔	real
1137	ملزم عابد کے پاس نہ موبائل تھا اور نہ پیسے جس کی وجہ سے اس کی تلاش ایک مشکل ٹاسک ثابت ہوا۔ یہ معاملہ جب میڈیا پر ٹھنڈا ہوا تو ’کنگلا‘ ملزم پکڑا گیا۔	real
1138	برطانوی ہائی کمشنر نے امید ظاہر کی ہے کہ برٹش ایئرویز کی لاہور سے پروازیں کاروباری اور انسانی روابط بڑھانے کے علاوہ سیاحت کے فروغ میں مددگار ثابت ہوں گی۔	real
1139	دوران زچگی خواتین کو خوراک، کھانے پینے کے اوقات، کام کاج کرنے، اٹھنے بیٹھنے سمیت متعدد ٹوٹکے اور مشوروں کے ساتھ ساتھ حمل سے وابستہ چند مفروضوں کا بھی سامنا کرنا پڑتا ہے لیکن اس تمام مفروضوں کی طبی حیثیت کیا ہے؟	real
1140	اسلام آباد ہائی کورٹ نے قومی رجسٹریشن اتھارٹی (نادرا) کی جانب سے حزبِ مخالف کی جماعت جمعیت علمائے اسلام (ف) کے سابق سینیٹر حافظ حمد اللہ کی شہریت منسوخ کرنے کے معاملے پر سماعت کرتے ہوئے سوال کیا ہے کہ ’کیا حافظ حمد اللہ کا بیٹا ابھی ملٹری اکیڈمی سے پاس آؤٹ نہیں ہوا، اس صورتحال میں کیا اُن کی شہریت پر شک کیا جا سکتا ہے؟‘	real
1141	مقابلہ اُس اپوزیشن کے ساتھ ہوا جس کے پاس تجربہ بھی تھا اور وقت پر کھیلنے کا طریقہ بھی۔ برس ہا برس سے اقتدار کی راہداریوں سے واقف جانتے ہیں کہ ترپ کا پتہ کب چلنا ہے اور میز کے اس طرف کس طرح آنا ہے: پڑھیے عاصمہ شیرازی کا کالم	real
1142	پاکستان میں گذشتہ ایک سال کے دوران آٹے کی قیمت میں 60 فیصد تک اضافہ ہوا ہے جبکہ چینی کی قیمت میں 30 فیصد، دالوں کی قیمتوں میں 40 فیصد جبکہ کوکنگ آئل کی قیمت میں 10 فیصد تک اضافہ ریکارڈ ہوا ہے۔	real
1143	پاکستان مسلم لیگ (ن) کی نائب صدر مریم نواز نے کہا ہے کہ آل پارٹیز کانفرنس نے [حکومت کے خاتمے کی] حتمی تاریخ جنوری کی دی ہوئی ہے تاہم انھیں لگتا ہے کہ جنوری سے بہت پہلے 'کام ختم ہوجائے گا۔'	real
1144	نو ستمبر کو منگل اور بدھ کی درمیانی شب پیش آنے والے ایک واقعے کے دوران دو افراد نے مبینہ طور پر مدد کے انتظار میں سڑک کنارے کھڑی گاڑی میں سوار خاتون کو پکڑ کر قریبی کھیتوں میں اُن کے بچوں کے سامنے ریپ کیا تھا۔	real
1145	بی بی سی نے12 اکتوبر 1999 کو نواز شریف حکومت میں شامل ایک وزیر سے بات کی جنھوں نے دعویٰ کیا کہ اکتوبر 1999 سے ایک ماہ پہلے چند ایسے واقعات ہوئے جن سے سابق وزیرِ اعظم نواز شریف کی کابینہ کے ارکان اور خود نواز شریف کو بھی یہ عندیہ مل گیا تھا کہ فوج انھیں برطرف کرنے والی ہے۔	real
1146	سماجی رابطے کی ویب سائٹ ٹوئٹر پر اپنے ایک پیغام میں عاصم باجوہ کا کہنا تھا کہ’میں نے وزیر اعظم پاکستان سے معاون خصوصی برائے اطلاعات کے اضافی عہدے سے دستبرداری کی درخواست کی تھی، جو انھوں نے منظور کر لی ہے۔‘	real
1147	جسٹس قاضی فائز عیسیٰ نے ریمارکس دیے کہ بادی النظر میں وزیر اعظم نے اس تقریب میں ذاتی حثیت میں شرکت کی اور وزیراعظم کی کسی خاص گروپ کے ساتھ الائن نہیں ہوسکتے وہ پورے ملک کے وزیر اعظم ہیں۔	real
1148	اگر ہم آپ سے یہ کہیں کہ آج آپ ایک ایسے شخص سے ملنے والے ہیں جن کے پاس فراری، لیمبر گینی، بی ایم ڈبلیو اور مرسیڈیز جیسی تین ہزار لگژری گاڑیوں کی کلیکشن ہے تو آپ یقیناً اپنے کانوں پر اعتبار نہیں کریں گے۔	real
1149	کسی سنسنی خیز فلم کی طرح دیکھنے والے کے اعصاب کو مسلسل تناؤ میں رکھنے والے اُن واقعات کا آغاز شام پانچ بجے ٹیلی ویژن کے ایک خصوصی نیوز بلیٹن سے ہوا اور یہ فلم اس وقت نقطہ عروج پر پہنچی جب جنرل پرویز مشرف کیمرے کے سامنے آئے۔	real
1150	پنجگور پولیس کے اہلکار کے مطابق مسلح افراد نے دونوں خواتین اور گاڑی کے ڈرائیور کو چھوڑ دیا جبکہ باقی چھ افراد کو نامعلوم مقام کی جانب لے گئے۔	real
1151	’خدانخواستہ فوج کمزور ہوئی تو پاکستان بھی شام، لیبیا، عراق، صومالیہ بن سکتا ہے۔ یہ فوج ہی ہے جس نے اس ملک کو متحد رکھا ہوا ہے۔‘ گرامر کے اعتبار سے یہ جملہ بالکل درست ہے مگر کیا حقائق کے اعتبار سے بھی مستند ہے؟ پڑھیے وسعت اللہ خان کا کالم بات سے بات۔	real
1152	صوبہ خیبر پختونخوا میں سوات یونیورسٹی کے وویمن کیمپس کی خاتون پروفیسر نے پولیس کو اپنے ساتھ ہونے والی ہراسانی اور دھمکیوں کے خلاف درخواست جمع کروائی ہے تاہم یونیورسٹی ترجمان نے ان الزامات کو مسترد کیا ہے۔	real
1153	کراچی میں دیوبند مسلک کے نامور عالم اور جامعہ فاروقیہ کے مہتمم مولانا عادل اپنے ڈرائیور سمیت موٹر سائیکل سواروں کی جانب سے کی جانے والی فائرنگ کے نتیجے میں ہلاک ہوگئے ہیں۔ ان کی نمازِ جنازہ اتوار کو ادا کی گئی۔	real
1154	کتابوں، انسانوں اور شہروں کے درمیان عجیب نہ سمجھ میں آنے والا تعلق ہوتا ہے۔ ہر شہر کے اپنے ہی باسی ہوتے ہیں۔ جن کو وہ نہ بسانا چاہے، وہ چاہتے ہوئے بھی اس شہر میں نہیں بس سکتے۔ کتابیں بھی شہر ہوتی ہیں جنھیں وہی آباد کرتے ہیں جنھیں وہ چاہیں۔ پڑھیے آمنہ مفتی کا کالم۔	real
1155	پاکستان کی سول بیوروکریسی کو حاصل مراعات کے متعلق جاننے کے لیے بی بی سی نے متعدد حاضر سروس اور ریٹائرڈ افسران سے بات کی ہے۔ چند افسران نے بیوروکریسی کو دی جانے والی مراعات کی کمی کا ذکر کیا ہے تو کچھ نے اسے غریب عوام پہ اضافی بوجھ سے بھی تشبیہ دی ہے۔	real
1156	پرائمری سکول کے استاد منو لنجار نے بی بی سی کو بتایا کہ یہ مندر چندے سے بنایا گیا ہے جس کے لیے انھوں نے فیس بک پر پوسٹ لگائی تھی جس کے بعد لوگوں نے ان کی مالی مدد کی اور تقریبا ڈیڑہ سال قبل اس کی تعمیر مکمل ہوئی تھی۔	real
1157	سرفراز احمد کی ٹیم سے ڈراپ کیے جانے کے بعد واپسی ہوئی لیکن اب وہ پہلے جیسی پوزیشن میں نہیں رہے ہیں۔ محمد رضوان نمبر ایک وکٹ کیپر کے طور پر ٹیم میں جگہ بنا چکے ہیں اور سرفراز احمد کو نمبر دو وکٹ کیپر کی حیثیت حاصل ہو چکی ہے۔	real
1158	بلوچ ہیومن رائٹس آرگنائزیشن کی چیئرپرسن بی بی گل بلوچ کا دعویٰ ہے کہ مقتول کی بیٹی طیبہ بلوچ کی جانب سے لاپتہ افراد کی بازیابی کی مہم میں شرکت پر حنیف چمروک کو ’تنبیہہ‘ کی گئی تھی۔	real
1159	پاکستان کی برّی فوج کے سربراہ نے پاکستان ملٹری اکیڈیمی سے پاس آوٹ ہونے والے کیڈٹس سے خطاب کرتے ہوئے کہا ہے کہ دشمنوں نے اپنے عزائم میں ناکام ہونے کے بعد پاکستان کے خلاف ہائبرڈ جنگ چھیڑ رکھی ہے۔	real
1160	30 جون 2020 کو ختم ہونے والے مالی سال میں زیر گردش نوٹوں میں گزشتہ آٹھ برسوں میں سب سے زیادہ اضافہ دیکھنے میں آیا اور صرف ایک مالی سال میں گردشی نوٹوں کی تعداد میں 1.1 ٹریلین کا اضافہ دیکھا گیا۔	real
1161	سینیٹر انوار الحق کاکڑ نے کہا کہ یہ بھی قابل غور ہے کہ صرف لڑکیوں کا مذہب تبدیل ہو رہا ہے لڑکے مذہب تبدیل نہیں کر رہے۔	real
1162	اس مقدمے میں اب تین افراد گرفتار ہیں جن میں سے ایک ملزم فیصل خالد ہیں جنھیں پشاور ہائی کورٹ نے کم عمر قرار دیا ہے۔ فیصل خالد نے توہینِ مذہب کے ملزم طاہر نسیم کو عدالت کے احاطے میں فائرنگ کرکے ہلاک کر دیا تھا	real
1163	لاہور میں انصاف لائرز فورم کے کنونشن سے خطاب کرتے ہوئے عمران خان نے اپوزیشن جماعتوں کے اتحاد اور سابق وزیر اعظم نواز شریف پر سخت تنقید کرتے ہوئے کہا کہ آئی ایس آئی کو ان کی ’چوری‘ کا پتا ہے۔	real
1164	پولیس نے جامعہ کراچی میں مبینہ ہراس کا مقدمہ درج کر کے چھ مشتبہ نو عمر لڑکوں کو گرفتار کر لیا ہے۔ یہ مقدمہ طالب علم شہیر علی کی مدعیت میں ٹاؤن تھانے میں درج کیا گیا ہے جس میں جنسی ہراسانی، جان بوجھ کر کسی کی بے عزتی کرنا اور اشتعال انگیزی کی دفعات لگائی گئی ہیں۔	real
1165	پشاور ہائی کورٹ نے افغانستان سے لائے گئے دس بچوں کو افغان قونصل خانے کے توسط سے واپس اپنے وطن میں والدین کے حوالے کرنے کا حکم دیا ہے اور درخواست گزار سمیت مدارس کے نمائندوں کو گرفتار کر کے تحقیقات کا حکم دیا ہے۔	real
1166	پرانے زمانے کے قصے کہانیوں میں یہ اکثر ہوتا تھا کہ بادشاہ یا اس کی بیٹی شدید بیمار ہوتی۔ سرکاری طبیب، حکیم، اتائی، ٹونے ٹوٹکے سب ناکام ہو جاتے اور ایسے میں کوئی مسافر یا درویش دور دیس کی کسی جڑی بوٹی یا تریاق سے فوری شفایاب کرتا اور انعام میں کوئی وزارت یا صوبہ پاتا۔	real
1167	کامران علی ایک پاکستانی سائیکلسٹ ہیں جنھوں نے لیہ سے اپنے سائیکل کا سفر کیا شروع کیا کہ اب وہ آرام سے بیٹھنے سے تھک جاتے ہیں۔	real
1168	یہ کہانی ایک ایسے پاکستانی اونٹ گاڑی بان کی ہے جس نے نہ صرف امریکی میڈیا کا دل اپنی سادہ اور مخلص باتوں سے جیتا بلکہ وہ ایک امریکی صدر کو فخر کے ساتپ اپنا دوست بھی کہہ سکتے تھے۔	real
1169	سابق وزیرِ اعظم نواز شریف نے اپنی دوسری حکومت کے خاتمے کے 21 سال مکمل ہونے پر جاری کیے گئے اپنے پیغام میں کہا ہے کہ بانی پاکستان کی ہدایات پر عمل نہ کرنے کی وجہ سے منتخب وزیرِ اعظم کو گرفتار کیا گیا۔	real
1170	منگل کو گم ہونے والی بچی کی مسخ شدہ لاش گھر سے کچھ ہی دور واقع کھیتوں سے ملی ہے اور پولیس کے مطابق شبہ ہے کہ انھیں ریپ کا نشانہ بنایا گیا ہے۔	real
1171	سہیل عباس کہتے ہیں کہ ’مجھے اچھی طرح یاد ہے کہ میری ’ڈریگ فلک‘ سے گیند اتنی تیزی سے گول کے بائیں جانب گئی تھی کہ گول کیپر کو بھی نظر نہیں آئی تھی اور نیٹ بھی پھٹ گیا تھا۔ امپائر کو بھی گیند نظر نہیں آئی‘۔	real
1172	لاہور ہائی کورٹ نے توہینِ مذہب کے الزام میں سزائے موت پانے والے ایک مسیح شخص کی سزا کو ختم کرتے ہوئے انھیں مقدمے سے بری کر دیا ہے لیکن سوال یہ ہے کہ اگر اعلی عدالتیں ناکافی شواہد کی بنا پر ایسے مقدمات میں ملزمان کو بری کر دیتی ہیں تو ماتحت عدالتیں انھی شواہد پر سزائیں کیسے سُنا دیتی ہیں؟	real
1173	جوگندر ناتھ منڈل نے 70 برس قبل اُس وقت کے وزیر اعظم کو لکھے گئے اپنے استعفے میں مذہبی جنونیت کے فروغ کا ذمہ دار پاکستانی اسٹیبلیشمنٹ کی مذہب کو ایک آلہِ کار کے طور پر استعمال کرنے اور پھر اس کے سامنے جھکنے کی روش کو قرار دیا تھا۔	real
1174	ماہرین کے مطابق ایک مکمل طور پر مسلح جنگی جہاز کا وزن تیس سے پچاس ہزار پاؤنڈ تک ہو سکتا ہے اور طیاروں کو لینڈنگ اور ٹیک آف کے لیے کم و بیش تین کلو میٹر لمبی جبکہ 150 فٹ چوڑی سطح درکار ہوتی ہے۔	real
1175	اسلام آباد ہائی کورٹ نے اپنے حکم میں کہا ہے کہ اگر اشتہار شائع ہونے کے 30 روز کے اندر نواز شریف نے عدالت کے سامنے سرنڈر نہ کیا تو انھیں اشتہاری قرار دے دیا جائے گا۔	real
1176	سپریم کورٹ نے امریکی اخبار وال سٹریٹ جنرل کے صحافی ڈینیئل پرل کے قتل کے مقدمے میں سزا یافتہ ملزمان کی بریت سے متعلق سندھ ہائی کورٹ کے فیصلے کے خلاف صوبائی حکومت کی اپیل پر عدالت عالیہ کا فیصلہ معطل کرنے میں توسیع دینے سے انکار کر دیا ہے۔	real
1177	بہاولپور کی ایک خود مختار ریاست کے طور پر دو سو برس کی تاریخ ہے لیکن اب اس کی قسمت تبدیل ہو چکی ہے اور یہاں کے لوگوں میں احساسِ محرومی پایا جاتا ہے۔	real
1178	ہم مرد بھی ایک لمحے ریپ کرنے والوں کو اپنے ہاتھوں سے پھانسی دینا چاہتے ہیں یا ان کا سر قلم کرنا چاہتے ہیں اور اگر کوئی عورت یہ کہہ دے کہ مجھے انصاف چاہیے تماشا نہیں تو آپ اسے ریپ کی دھمکیاں دینے لگتے ہیں کیونکہ ہم سے بے عزتی برداشت نہیں ہوتی۔	real
1179	اسلام آباد ہائی کورٹ نے یہ سوال بھی اٹھایا کہ کیا پاکستان کی طرف سے کلبھوشن جادھو کو وکیل کی سہولت فراہم کرنے سے عالمی عدالت انصاف کی جانب سے اس حوالے سے کیے جانے والے فیصلے پر موثر عملدرآمد ممکن ہو پائے گا؟	real
1180	پاکستانی معاشرے میں جب شادی یا طلاق کے بارے میں بات کی جاتی ہے تو عورتوں کی بے چارگی یا اُن کے دُکھ پر ہی توجہ مرکوز کی جاتی ہے۔	real
1181	آخر کسی نے تو غداری کے مقدمے کا آئیڈیا دیا ہو گا جس سے ملک کے وزیراعظم نے بھی خود کو فاصلے پر کر لیا ہے۔ جس ملک کا چیف ایگزیکٹو معاملات سے لاتعلق ہو جائے وہاں مسائل کون حل کرے گا؟: پڑھیے عاصمہ شیرازی کا کالم	real
1182	ماہرین کا خیال ہے کہ 2016 میں سامنے آنے والی ایک خبر جسے ’ڈان لیکس‘ کا نام دیا گیا، اس وقت کی حکومت اور اسٹیبلشمنٹ کے درمیان پائے جانے والے اختلافات کو افشا کرنے کا سبب بنی۔	real
1183	پشاور پولیس کے مطابق سوموار کو دن کے وقت کوہاٹ روڈ پر قتل کی ایک واردات میں پروفیسر ڈاکٹر نعیم الدین خٹک ہلاک ہوگئے ہیں۔	real
1184	نواز شریف کے خلاف درج ہونے والی ایف ائی آر میں غداری، ریاست کے خلاف بغاوت پر اُکسانے اور سائبر کرائم ایکٹ پیکا کی دفعات سمیت مجموعی طور پر 12 مختلف دفعات شامل کی گئی ہیں۔	real
1185	کورونا پر پاکستان کے نیشنل کمانڈ اینڈ آپریشن سنٹر کے اعداد وشمار کے مطابق پاکستان کے زیر انتظام کشمیر میں گذشتہ 24 گھنٹوں میں 46 افراد میں کورونا وائرس کی تصدیق کی گئی جو گذشتہ ماہ آٹھ ستمبر کے بعد سے یومیہ متاثرین کی سب سے زیادہ تعداد ہے۔	real
1186	میڈیا پر وفاق اور صوبہ سندھ کے درمیان جزائر پر قبضے کی جنگ کو مون سون کی بارشوں نے وقتی طور پر ٹھنڈا کردیا تھا مگر وفاق کی جانب سے جاری کردہ حالیہ آرڈ یننس سے یہ تنازع ایک بار پھر سے گرم ہوچکا ہے اور فریقین کے تیور بتا رہے ہیں کہ آنے والے دنوں میں یہ اور بڑھے گا۔	real
1187	پشتو زبان کا پہلا نغمہ سنہ 1902 میں برطانیہ جا کر ریکارڈ کیا گیا اور اس نغمے کو گانے والی گلوکارہ کا نام گوہر جان تھا جو کہ ایک افغان رقاصہ تھیں۔	real
1188	ایف بی آر کے مطابق یہ نیا قانون صرف پرانی گاڑیوں کو ری کنڈیشن حالت میں فروخت کرنے والے کاروبار کے لیے ہے۔ ان کی حوصلہ افزائی کے لیے سیلز ٹیکس کی رعایتی شرح متعین کی گئی ہے۔	real
1189	وہ جو کہتے ہیں کہ گھوڑا گھاس سے یاری لگائے گا تو کھائے گا کیا؟ اسٹیبلشمنٹ کے نہ تو مستقل حریف اور نہ ہی مستقل حلیف ہوتے ہیں۔ دوستی یا دشمنی کا معیار بس یہ ہے کہ جب آپ کو ایک طے شدہ نظریہ پاکستان دے دیا گیا ہے تو پھر اپنا نظریہِ پاکستان الگ سے گھڑنے کی کیا ضرورت ہے۔ پڑھیے وسعت اللہ خان کا کالم۔	real
1190	آغا خان یونیورسٹی کی ایک تحقیق کے مطابق کراچی میں 10 میں سے نو متاثرین میں علامات ظاہر نہیں ہو رہیں۔ شہر کی غریب اور امیر آبادیوں سے لیے گئے نمونوں کے مطابق جن 95 فیصد لوگوں میں کورونا ٹیسٹ مثبت آئے ان میں کوویڈ 19 کی علامات ہیں نہیں تھیں۔	real
1191	موسیٰ خان بلوچ جمعیت علمائے اسلام (ف) کے تحصیل پہاڑپور کے امیر ہیں اور ان دنوں نیب کی حراست میں ہیں۔ بعض تجزیہ کار اور ماہرین قانون کا کہنا ہے کہ بظاہر ’موسیٰ خان کو مولانا فضل الرحمان کے قریبی ساتھی ہونے پر گرفتار کیا گیا ہے اور اس گرفتاری کا مقصد مولانا کو ہراسان کرنا ہے‘۔	real
1192	پاکستان میڈیا ریگولیٹری اتھارٹی (پیمرا) نے تمام لائسنس یافتہ ٹی وی چینلوں کو ہدایت کی ہے کہ وہ اشتہاری ملزمان کی تقاریر نشر نہ کریں جس کے بعد ملک میں نواز شریف کی تقاریر نشر کرنے کے تناظر میں ایک نئی سیاسی اور قانونی بحث چھڑ گئی ہے۔	real
1193	رواں ہفتے ایف آئی اے سائبر کرائمز لاہور نے گلوکار علی ظفر کی جانب سے مبینہ طور پر باقاعدہ منصوبہ بندی کے تحت انھیں بدنام کرنے کی کوشش کے الزام میں پاکستانی گلوکارہ میشا شفیع سمیت دیگر آٹھ افراد کے خلاف ایف آئی آر درج کی ہے۔	real
1194	پاکستان ڈیموکریٹک موومنٹ کے حوالے سے یہ سوال گردش کر رہا ہے کہ کیا حزبِ اختلاف کی ان سیاسی جماعتوں میں با معنی اتحاد بن پائے گا یا پھر ان کے درمیان موجود دراڑیں وقت گزرنے کے ساتھ گہری ہو سکتی ہیں؟	real
1195	نیلسن منڈیلا نے غیر جانبدار ممالک کی تنظیم کے چیئرمین کی حیثیت سے کشمیر کو انڈیا اور پاکستان کے درمیان ایک متنازع خطہ کہا تو انڈیا میں غم و غصے کا اظہار کیا گیا۔	real
1196	پاکستان کے وزیراعظم عمران خان نے کہا ہے کہ پاکستان نے ماضی سے سیکھا ہے کہ فوج کا کام ملک چلانا نہیں ہوتا اور یہ کہ اگر جمہوری نظام ٹھیک نہ چل رہا ہو تو اس کا مطلب یہ نہیں کہ اس کی جگہ مارشل لا آ جائے۔	real
1197	کھانوں کی تراکیب شیئر کرنے والی جنوبی افریقہ کی ویب سائٹ فوڈ 24 نے بریانی کی غیر روایتی ترکیب لگا کر سوشل میڈیا صارفین کو نالاں کر دیا جس کے بعد انھیں نہ صرف معافی مانگنی پڑی بلکہ ویڈیو بھی ہٹانا پڑی۔	real
1198	اسلام آباد ہائی کورٹ کے چیف جسٹس اطہر من اللہ نے دو سال قبل لاپتہ ہونے والے شہری ساجد محمود کی بازیابی سے متعلق درخواست کی سماعت کے دوران ریمارکس دیے ہیں کہ جبری گمشدگی سے مراد یہ ہے کہ ریاست کے کچھ لوگ ہی لوگوں کو زبردستی غائب کرتے ہیں۔	real
1199	پاکستان کے سابق وزیراعظم نواز شریف نے بدھ کو لندن میں صحافیوں سے بات کرتے ہوئے دعویٰ کیا کہ پاکستان نے کروز میزائل کی ٹیکنالوجی بلوچستان سے ملنے والے امریکی ٹوماہاک میزائل کی ریورس انجینئرنگ کر کے حاصل کی جبکہ پاکستان سرکاری سطح پر اسے سائنسدانوں کی محنت قرار دیتا ہے۔	real
1200	پاکستان کے صوبہ سندھ کے صحرائی علاقے تھر میں پولیس کے مطابق گذشتہ برس مبینہ طور پر ریپ کا نشانہ بننے والی ایک ہندو لڑکی نے خودکشی کر لی ہے اور لڑکی کے والد کا دعویٰ ہے کہ ان کی بیٹی نے بلیک میل کیے جانے پر یہ قدم اٹھایا۔	real
1201	تلاوت کروانے کا فیصلہ ہو گیا لیکن اس میں ایک عملی رکاوٹ حائل تھی کہ جنرل اسمبلی کے پروٹوکول کے مطابق سربراہان ریاست کے خطاب کے دوران کوئی دوسرا شخص روسٹرم پر آسکتا ہے اور نہ ایجنڈے سے ہٹ کر کوئی دوسری بات کہی جا سکتی ہے۔ اس مشکل کا حل کیسے نکالا گیا؟	real
1202	ماں بننے کے لیے کتنی ہی تیاری کر لی جائے، نانی دادای کے مشورے لیے جائیں، کتابیں پڑھ لی جائیں اور آج کل انٹرنیٹ پر رنگ رنگ کی معلومات جمع کر لی جائے یا ایپس ڈاؤن لوڈ کر لی جائیں، نومولود بچوں کے کچھ عمومی مسائل پھر بھی ماؤں کو بوکھلا دیتے ہیں۔	real
1203	ضلع بہاولپور کے علاقے احمد پور میں گنجیانوالا کھو چار چک سے داپھیا بائی کے ماں باپ نے جہیز دے کر جب ان کے شوہر ہیملہ رام کے ساتھ خیرپور ٹامیوالی کے لیے انھیں رخصت کیا تھا تو انھیں نہیں معلوم تھا کہ وہ آخری مرتبہ انھیں دیکھ رہے تھے۔	real
1204	بی بی سی اردو نے پچاس سال پہلے ایک مضمون نویسی کا ایک مقابلہ کروایا تھا جس میں پوچھا گیا تھا کہ ان کے خیال میں پچاس سال بعد دنیا کیسی ہو گی۔ ذار دیکھیئے ہمارے سامعین نے کیا جواب دیے۔	real
1205	سنہ 1987 میں عمانوئیل متات 25 برس کے تھے جب ان کے خاندان نے کراچی سے ہجرت کی اور وہ اسرائیل میں آباد ہوئے۔ اتنا عرصہ گزر جانے کے باوجود وہ پاکستانی کرکٹرز کے دیوانے ہیں اور کرکٹ کی یادیں ان کے لیے سرمایہ حیات ہیں۔	real
1206	لاہور موٹروے ریپ کیس کے بعد سے پاکستانی خواتین میں سٹن گن جیسے دفاعی آلات کی خریداری کا رجحان بڑھ رہا ہے اس حقیقت سے قطع نظر کہ اس نوعیت کے آلات کو رکھنا قانوناً جرم ہے۔	real
1207	انڈیا کی حکومت نے پاکستان کی جانب سے گلگت بلتستان میں انتخابات کرانے اور اسے صوبے کی حیثیت دینے کی کوششوں کی مذمت کرتے ہوئے کہا ہے کہ پاکستان اس علاقے پر غیر قانونی قبضہ کر رہا ہے۔	real
1208	مبصرین کا کہنا ہے کہ نیب کے ایک مبینہ نوٹس کی بازگشت کے بعد جمعیت علماء اسلام ف کے سربراہ مولانا فضل الرحمان جس طرح کھل کر میدان میں آئے ہیں اس طرح کا رویہ پہلے کم ہی دیکھنے کو ملا ہے۔	real
1209	وزارت دفاع کے مطابق اب کوئی بھی 'سیاستدان، بیوروکریٹ اور سرکاری ملازم' مسلح افواج کے سربراہان یا اہلکاروں سے سرکاری معاملات کے سلسلے میں براہِ راست نہیں مل سکے گا۔ بلکہ اب یہ ملاقاتیں وزارت دفاع کے ذریعے طے کی جائیں گی۔	real
1210	لاہور کے سی سی پی او عمر شیخ سمیت متعدد بیوروکریٹس کی اگلے گریڈ میں پروموشن کا معاملہ بھی کھٹائی میں پڑ گیا ہے اور اس کے ساتھ ہی ان کا ایک اور بیان بھی سوشل میڈیا پر زیرِبحث ہے۔	real
1211	افغانستان کی اعلیٰ قومی مصالحتی کونسل کے چیئرمین عبداللہ عبداللہ نے کہا ہے افغانستان میں امن پاکستان میں موجود استحکام کو مزید تقویت فراہم کرے گا لیکن اگر افغانستان میں تشدد کم نہ ہوا تو افغان امن عمل میں پیشرفت کو یقینی بنانا مشکل ہو گا۔	real
1212	پہلی بار یہ بھی ہو رہا ہے کہ دفاع کے لیے لائی جانے والی حکومت مدافعت کے لیے دفاعی ادارے کو استعمال کر رہی ہے اور ادارہ اپنے دفاع میں مدافعانہ پالیسی اختیار کیے ہوئے ہے: پڑھیے عاصمہ شیرازی کا کالم	real
1213	احتساب عدالت نے مسلم لیگ ن کے صدر شہباز شریف کا 14 روزہ جسمانی ریمانڈ منظور کر دیا ہے اور اب انھیں 13 اکتوبر کو دوبارہ پیش کیا جائے گا۔	real
1214	پاکستان میں گاڑیوں کے لیے الیکٹرک وہیکل پالیسی تاخیر کا شکار ہے مگر بعض لوگوں نے الیکٹرک گاڑیاں خرید کر چلانا شروع کردی ہیں۔ وہ اپنے اب تک کے تجربے سے مطمئن ہیں لیکن انھیں کئی ’مہنگی‘ مشکلات کا سامنا ہے۔	real
1215	پاکستان میں ستمبر کے مہینے کے وسط سے حزب مخالف کی جماعتوں کے متحرک ہونے سے سیاسی ماحول خاصا گرم ہو گیا تھا تاہم آج شہباز شریف کی گرفتاری اور مریم نواز کی جانب سے شدید ردِعمل سامنے آنے پر گہما گہمی میں مزید اضافہ ہو گیا ہے۔	real
1216	سپریم کورٹ کے جج جسٹس قاضی فائز عیسیٰ نے کہا ہے کہ اگر پاکستان میں حلف کی پاسداری کی جاتی تو آج ملک بلکل مختلف حالت میں ہوتا۔	real
1217	پی آئی اے کے ترجمان عبداللہ حفیظ نے دعویٰ کیا کہ زیادہ کرایہ لینے والے بعض ایجنٹوں کے خلاف کارروائی کی جا رہی ہے اور اگر مسافروں سے کوئی اضافی کرایہ لے رہا ہے تو اس کی شکایت کی جائے جس پر ہر صورت کارروائی ہوگی اور جرمانہ عائد کیا جائے گا۔	real
1218	اسلام آباد کی احتساب عدالت نے سابق صدر آصف علی زرداری اور ان کی بہن فریال تالپور پر منی لانڈرنگ کے مقدمے میں فرد جرم عائد کر دی ہے۔ تاہم ملزمان نے فرد جرم سے انکار کیا ہے۔	real
1219	کیا آپ جانتے ہیں کہ آپ کو یہ جاننے کا حق ہے کہ آپ کے علاقے کے رکن اسمبلی کو ترقیاتی کاموں کے لیے کتنی رقم ملی اور وہ کہاں خرچ ہوئی۔	real
1220	پاکستان میں غیر واضح جنس کے ساتھ پیدا ہونے والے نوزائیدہ بچوں کے بارے میں ایک عام خیال یہ کیا جاتا ہے کہ وہ خواجہ سرا ہیں۔ اس رپورٹ میں یہ جاننے کی کوشش کی گئی ہے کہ بچوں میں غیر واضح جنس کی موجودگی کی وجوہات کیا ہیں، اس کا علاج کیا ہے اور حاملہ مائیں کن احتیاطی تدابیر کو اختیار کر کے اس صورتحال سے بچ سکتی ہیں۔	real
1221	یورپی یونین ممالک کو باسمتی چاول کی برآمد پاکستان کے ساتھ انڈیا سے بھی کی جاتی ہے تاہم حال ہی میں انڈیا نے یورپی یونین میں چاول کی باسمتی کوالٹی کے حقوق اپنے نام محفوظ کرنے اور اسے ایک انڈین پراڈکٹ قرار دینے کی درخواست جمع کرائی ہے۔	real
1222	پی ایف یو جے نے اپنی فیڈرل ایگزیکٹیو کونسل کی میٹنگ کے اختتام پر جاری کیے گئے اعلامیے میں پاکستانی وزیرِ اعظم عمران خان کی حکومت کو ملکی میڈیا انڈسٹری میں جاری حالیہ بحران کا 'براہِ راست ذمہ دار' ٹھہرایا ہے۔	real
1223	پاکستان کے وزیرِ اعظم عمران خان کا امریکی اخبار واشنگٹن پوسٹ میں شائع ہونے والے کالم میں کہنا ہے کہ افغانستان میں امن کا قیام نزدیک ہے تاہم ملک سے غیر ملکی فوجوں کے انخلا میں جلد بازی دانائی نہیں ہو گی۔	real
1224	پاکستان کے صوبہ بلوچستان کے افغانستان سے متصل سرحدی شہر چمن میں فائرنگ کے ایک واقعے میں پولیو ٹیم کی سکیورٹی پر مامور لیویز فورس کے ایک اہلکار زخمی ہو گئے ہیں۔	real
1225	آسمان نے دیکھا کہ جاری سیاسی تھیٹر کے سٹیج پر اوور ایکٹنگ کرنے والی شلوار سوٹ حکومت اچانک مہمان اداکار میں تبدیل ہو گئی اور کہانی نے انہونا موڑ لے لیا۔	real
1226	میاں صاحب کی تقریر اچھی ہو گی، شاید کسی کو اس پر یقین بھی ہو لیکن معاش کی چکی میں پستے ہوئےعوام کو یہ چمکیلے نعرے، سماجی انصاف، غیر مرئی قوتوں سے جنگ کے نادیدہ خواب اور کوہ ندا کی کہانیاں سمجھ نہیں آتیں۔ آمنہ مفتی کا کالم۔	real
1227	پاکستان کے صوبہ سندھ کے شہر کراچی میں سپر ہائی وے پر حیدرآباد سے کراچی جانے والی مسافر وین کو پیش آنے والے حادثے میں کم از کم 12 افراد ہلاک ہو گئے ہیں۔	real
1228	کاون کو منتقلی سے پہلے اس طویل سفر کے لیے تیار کرنے میں اہم کردار ادا کر رہے ہیں مصر کے ماہرِ حیوانات ڈاکٹر عامر خلیل۔ فرینک سیناٹرا کے گانوں سے جھوم اٹھنے والے کاون کی پلے لسٹ میں اب اریب اظہر کی آواز کا بھی اضافہ ہو گیا ہے۔	real
1229	حالیہ چند دنوں میں پاکستانی سوشل میڈیا پر نمرا نامی لڑکی کا خاصا چرچا رہا۔۔ اپنی سادگی اور پُر لطف باتوں سے ہر جانب مسکراہٹیں بکھیرنے والی نمرہ دیکھتے ہی دیکھتے وائرل ہو گئیں لیکن مسکراہٹیں بکھیرنے کے چکر میں وہ کچھ ایسا کہہ گئیں جس کا خدشہ کئی صارفین نے چند دن پہلے ہی کر دیا تھا۔	real
1230	انڈیا نے وزیر اعظم پاکستان عمران خان کے اقوام متحدہ کی جنرل اسمبلی میں گذشتہ روز کیے گئے خطاب کو ’ایک نیا سفارتی زوال‘ قرار دیتے ہوئے اسے ’جھوٹ، ذاتی حملوں، جنگ کے جذبات کو بھڑکانے اور پاکستان میں اقلیتوں پر ہونے والے مظالم اورسرحد پار دہشت گردی پر پردہ ڈالنے‘ کی ایک کوشش قرار دیا ہے۔	real
1231	اسلام آباد ہائی کورٹ نے سکیورٹیز اینڈ ایکسچینج کمیشن آف پاکستان کے ایڈیشنل ڈائریکٹر ارسلان ظفر کی جانب سے دائر درخواست کو قابل سماعت قرار دیتے ہوئے ان کے خلاف ایس ای سی پی کو کارروائی سے آئندہ سماعت تک روک دیا ہے۔	real
1232	وفاقی حکومت اور وزارتِ ہوا بازی کی جانب سے پاکستان میں ’جعلی اور مشتبہ لائسنس کے حامل پائلٹس‘ کے معاملے پر چوتھا مؤقف سامنے آیا ہے جس میں یہ دعویٰ کیا گیا ہے کہ ایئر لائنز نے اپنے پائلٹس کے حوالے سے پاکستان سول ایوی ایشن اتھارٹی کو 'غلط تفصیلات' فراہم کیں جن کی بنیاد پر متعدد پائلٹس کو غلطی سے ’مشتبہ لائسنس یافتہ‘ قرار دیا گیا۔	real
1233	مشرقی پاکستان کے ڈپٹی سپیکر شاہد علی، جو سپیکر کا منصب سنبھالنے کے لیے بے چین تھے، دو روز تک بے ہوش رہنے کے بعد 26 ستمبر 1958 کو انتقال کر گئے۔ یوں اقتدار پر قابض رہنے کی یہ بے رحمانہ لڑائی جس میں سیاسی، جمہوری اور پارلیمانی، تمام روایات کو پامال کر دیا گیا تھا اپنے افسوسناک انجام کو پہنچی۔	real
1234	پاکستان میں فوج اور سیاستدانوں کے بیانات کے بعد جاری کشمکش کے پاکستان کے وزیر اعظم نے ملک کے نجی نیوز چینلز کے اہلکاروں سے ملاقات میں کہا ہے انہیں اپوزیشن کا کوئی خوف نہیں اور فوج وہی کرتی ہیں جو وہ انہیں کرنے کو کہتے ہیں۔	real
1235	وزیراعظم پاکستان عمران خان نے اقوام متحدہ کی جنرل اسمبلی کے 75ویں اجلاس سے خطاب میں انڈیا پر تنقید کرتے ہوئے کہا کہ انڈیا میں ریاست اسلاموفوبیا کو فروغ دے رہی ہے اور یہ کہ دنیا میں اسلاموفوبیا کے خاتمے کے لیے ایک عالمی دن مقرر کیا جانا چاہیے۔	real
1236	پاکستان کے پانچ ہسپتالوں میں 10 ہزار رضاکاروں کو یہ ویکسین لگائی جائے گی اور امید کی جا رہی ہے کہ کامیابی کی صورت میں یہ ویکسین ایک بڑی مقدار میں پاکستان کو دستیاب ہوگی۔	real
1237	جمیعت علمائے اسلام (ف) کے رہنما عبدالغفور حیدری کی جانب سے جنرل قمر باجوہ پر آزادی مارچ نہ کرنے اور نواز شریف کے خلاف ہونے والے اقدامات میں مداخلت نہ کرنے پر اصرار کے الزامات نے پاکستانی سیاست میں فوج کے کردار پر جاری بحث کو مزید ایندھن فراہم کر دیا ہے۔	real
1238	میاں نواز شریف کی تقریر اور پھر فوجی بریفنگ کے حوالے سے کچھ مفروضے، سازشی کہانیاں زیر گردش ہیں جنھیں سن کر میاں نواز شریف کی تقریر، فوجی بریفنگ اور گورنر محمد زبیر کی ملاقاتوں کی کہانی کچھ کچھ سمجھ آتی ہے: پڑھیے سہیل وڑائچ کا کالم	real
1239	2014 میں آرمی پبلک سکول پشاور پر ہونے والے حملے کے بارے میں حقائق معلوم کرنے کے لیے تشکیل پانے والے عدالتی کمیشن نے اپنی رپورٹ میں اس واقعے کو سکیورٹی کی ناکامی قرار دیا ہے اور کہا ہے کہ اس واقعے نے ہمارے سکیورٹی نظام پر سوالیہ نشان لگا دیا ہے۔	real
1240	ٹائم ماگزین نے اپنے ستمبر 1958 کے شمارے میں انکشاف کیا تھا کہ پاکستان گوادر کے مقام پر ایک بڑا ایئرپورٹ اور بحری اڈہ تعمیر کرنے کا ارادہ رکھتا ہے۔ یہ پیشگوئی کم و بیش نصف صدی بعد پوری ہونے کی نوبت آ رہی ہے۔	real
1241	نواز شریف کی جانب سے عسکری نمائندوں سے ملاقاتیں نہ کرنے سے متعلق اعلان کے باوجود سوشل میڈیا پر یہ بحث ہو رہی ہے کہ ایسی ملاقاتیں پھر بھی جاری رہیں گی جبکہ بہت سے صارفین نواز شریف سے لیگی رہنماؤں کی ایسی سابقہ ملاقاتوں کے بارے میں بھی جواب مانگ رہے ہیں۔	real
1242	سابق وزیر اعظم اور پاکستان مسلم لیگ ن کے قائد نواز شریف کا کہنا ہے ان کی جماعت کا کوئی رکن آئندہ انفرادی، جماعتی یا ذاتی حیثیت میں عسکری اور متعلقہ ایجنسیوں کے نمائندوں سے ملاقات نہیں کرے گا۔	real
1243	انٹرنیشنل سول ایوی ایشن آرگنائزیشن نے اپنے خط میں ایسے لائسنسز کو معطل کرنے کی تجویز دی ہے جن کے بارے میں اس بات کا کوئی ثبوت نہیں کہ پائلٹ کی مطلوبہ قابلیت کو پاکستان سول ایوی ایشن کے ضوابط، طریقہ کار اور پالیسیوں کے مطابق جانچا گیا تھا۔	real
1244	سپریم کورٹ نے اسلام آباد ہائی کورٹ کے سابق جج جسٹس شوکت عزیز صدیقی کو سپریم جوڈیشل کونسل کی طرف سے عہدے سے ہٹانے سے متعلق درخواست کی سماعت کے دوران کہا ہے کہ پاکستان کے آئین میں سپریم جوڈیشل کونسل کے فیصلے کے خلاف اپیل کا حق نہیں۔	real
1245	ملک میں کاغذوں کی حد تک تو صحت کا مضبوط بنیادی ڈھانچہ نظر آتا ہے لیکن سرکاری اعداد و شمار کے مطابق اس وقت پاکستان بھر میں میں 1500 مریضوں کے لیے ایک ڈاکٹر ہے، جبکہ حاملہ خواتین اور نومولود بچوں کے لیے مک بھر میں صرف 756 بنیادی صحت کے مراکز ہیں۔	real
1246	پولیس کے مطابق بچے کی ایک عزیزہ نے بھی بیان دیا ہے کہ انھوں نے بچے کو گولی چلاتے ہوئے دیکھا مگر کیا خاتون کی اس گواہی کو بغیر شک و شبہ مانا جا سکتا ہے؟	real
1247	سوشل میڈیا پر لوگوں کا خیال ہے کہ پاکستان میں حزب مخالف کی جماعتوں کی جانب سے آل پارٹیز کانفرنس بلائے جانے کے بعد جو سخت موقف جماعتوں بالخصوص نواز شریف کی جانب سے اختیار کیا گیا یہ انہی صلح کی کوششوں میں ناکامی کا ردعمل ہے۔	real
1248	بلاول بھٹو نے کہا کہ قومی سلامتی سے متعلق اجلاس یا کوئی بھی ان کیمرہ اجلاس ہو تو اس کی تفصیلات سامنے نہیں لائی جاتیں لیکن کچھ غیر ذمہ دار لوگ جن کا تعلق نہ قومی سلامتی سے، نہ گلگت بلتستان سے نہ آزاد کشمیر سے نہ ہی خارجہ پالیسی سے تھا، انھوں نے مجبور کیا ہے کہ میں اس حوالے سے بات کروں۔ انھوں نے کہا کہ قومی سلامتی پر میٹنگ میں شیخ رشید ہوئے تو میں نہیں جاؤں گا۔	real
1249	پاکستان کی قومی اسمبلی کی قائمہ کمیٹی برائے قوائد و ضوابط اور استحقاق کے اجلاس میں کمیٹی ارکان کی جانب سے لاہور کے سی سی پی او ڈی آئی جی عمر شیخ سے پوچھے گئے سوالوں کا تسلی بخش جواب نہ دینے پر ارکان نے سخت اظہار برہمی کا اظہار کیا ہے۔	real
1250	سیاسی ماہرین کے مطابق گلگت بلتستان کو پاکستان میں ضم کرنے کا فیصلہ ملک کی سلامتی مفادات کے پیش نظر کیا جا رہا ہے کیونکہ پاکستان چاہتا ہے کہ سی پیک کے راستے کو محفوظ کیا جائے، مگر دوسری جانب انڈیا اس خطے کو متنازع علاقہ قرار دیتا ہے۔	real
1251	اسلام آباد ہائی کورٹ کے میں جسٹس فاروق اور جسٹس محسن اختر کیانی پر مبنی دو رکنی بینچ نے مریم نواز اور ان کے خاوند کیپٹن صفدر کی ایون فیلڈ ریفرنس کیس میں سزا پر اپیلوں کی سماعت کرتے ہوئے کہا کہ مریم نواز کے والد، سابق وزیر اعظم نواز شریف کی بھی اسی کیس کے حوالے سے حاضری یقینی بنانے کا عمل شروع کیا ہوا ہے اور اُس کی تکمیل کے بعد ہی مریم نواز اور کیپٹن صفدر کی اپیلیں سنی جائیں گی	real
1252	ترکی کے صدر رجب طیب اردوغان نے اقوم متحدہ کی 75 ویں سالگرہ پر خطاب کرتے ہوئے ایک بار پھر کشیمر کا مسئلہ اٹھایا تو انڈیا نے ایک بار پھر اسے تنقید کا نشانہ بنایا۔	real
1253	دلچسپ بات یہ ہے کہ وزارت خارجہ کی طرف سے اقوام متحدہ کو ارسال کی گئی درخواستوں میں ان رہنماؤں کی طرف سے اپنے ماہانہ اخراجات کا بھی ذکر کیا گیا ہے، جو کم سے کم ایک لاکھ اور زیادہ سے زیادہ تین لاکھ روپے تک ہیں۔	real
1254	ڈبلیو ڈبلیو ایف سے وابستہ محمد معظم خان کے مطابق سنہ 2019 میں کیے گئے ایک سروے کے مطابق منچھر جھیل میں پانی کی آلودگی کی شرح سات ہزار ٹی ڈی ایس تھی جبکہ آج کل بارشوں کے بعد یہ شرح صرف تین سے چار سو ڈی ڈی ایس رہ گئی ہے جو ڈبلیو ایچ او کے مقرر کردہ معیار سے بھی کم ہے۔	real
1255	قومی احتساب بیورو نے جمیعت علماء اسلام (ف) کے سربراہ مولانا فضل الرحمان کو آمدن سے زیادہ اثاثے رکھنے کے الزام میں یکم اکتوبر کو طلب کر لیا ہے۔	real
1256	پاکستان میں شمالی وزیرستان کی تحصیل میر علی میں ایک احتجاج کیا جا رہا ہے۔ جس میں یہاں سے کوسوں دور موجود بہت سے لوگ بھی سوشل میڈیا اکاؤنٹس کے ذریعے شامل میں۔ ٹوئٹر پر صارفین کی جانب سے جسٹس فار ناہید کے نام سے ٹرینڈ چلایا جا رہا ہے۔	real
1257	وزیر اعظم عمران خان کے معاون خصوصی برائے صحت اور کووڈ 19 کے فوکل پرسن ڈاکٹر فیصل سلطان نے کہا ہے کہ پاکستان ان گنے چنے ممالک میں شامل ہو گیا ہے جہاں کورونا وائرس کے علاج کے لیے ویکسین کے ٹرائل کا آغاز ہو چکا ہے۔ جبکہ محکمہ تعلیم کی جانب سے اعلان کیا گیا ہے کہ 23 ستمبر سے مزید بچے سکول جا سکیں گے۔	real
1258	العزیزیہ سٹیل ملز کے مقدمے میں احتساب عدالت کی طرف سے ملنے والی سزا کے خلاف سابق وزیر اعظم میاں نواز شریف کی اپیل کی سماعت کے دوران اسلام آباد ہائی کورٹ کی جانب سے کہا گیا کہ اپیل کنندہ کو بیرون ملک علاج کی غرض سے وفاقی حکومت نے بھجوایا اور اب مجرم کو عدالت میں پیش کرنا بھی وفاقی حکومت کا کام ہے۔	real
1259	کراچی کی ایک انسدادِ دہشت گردی کی عدالت نے آٹھ برس بعد بلدیہ فیکڑی آتشزدگی کیس میں مرکزی ملزمان زبیر چریا اور عبدالرحمان عرف بھولا کو سزائے موت جبکہ چار دیگر سہولت کاروں کو عمر قید کی سزا سنائی ہے۔ اس کیس میں نامزد سابق صوبائی وزیر رؤف صدیقی سمیت چار دیگر ملزمان کو بری کر دیا ہے۔	real
1260	سوشل میڈیا پر آئے روز کئی لوگ وزیراعظم عمران خان کو مخاطب کر کے کوئی نہ کوئی سوال کرتے نظر آتے ہیں۔ لیکن گذشتہ روز صحافی انصار عباسی نے ایک ویڈیو شیئر کرتے ہوئے وزیراعظم کو کچھ ایسا کہا جس پر ٹوئٹر صارفین ان پر خاصے برہم دکھائی دیے۔	real
1261	نواز شریف کی تقریر کے دو جملوں نے جیسے سکتہ طاری کر دیا ہے، ’ریاست سے اوپر ریاست اور مد مقابل عمران خان نہیں اُن کے لانے والے‘ نواز شریف نے یہ کیوں کہا؟ کیا نواز شریف اب بھی کسی ڈیل کے چکر میں ہیں اسی لیے اسٹیبلشمنٹ کو دباؤ میں لا کر فیصلہ کروانا چاہتے ہیں: عاصمہ شیرازی کا کالم۔	real
1262	پاکستانی فضائیہ کے پائلٹ قیس حسین کے مطابق ان کے فائرنگ کرنے سے قبل انڈین جہاز نے بار بار ایسے اشاروں سے بتانے کی کوشش کی کہ وہ ایک سویلین ہوائی جہاز ہے۔	real
1263	سیالکوٹ موٹروے ریپ کیس کی تفتیش کے دوران پولیس مرکزی ملزم کی تلاش میں متعدد چھاپے مار چکی ہے لیکن ہر بار وہ بچ نکلتا ہے۔ آخر یہ ملزم پولیس سے دس قدم آگے کیوں ہے؟ کیا محکمے کے اندر سے کچھ لوگ اس کی مدد کر رہے ہیں یا اسے نہ پکڑ پانا پولیس کی نااہلی ظاہر کرتا ہے؟	real
1264	حکومت کے مطابق پاکستان میں بجلی پیدا کرنے کی صلاحیت 35000 میگاواٹ سے زائد ہے مگر پاکستان میں بجلی کی کھپت دس ہزار سے چوبیس ہزار میگاواٹ کے درمیان رہتی ہے اور حکومت کو اضافی بجلی کے عوض ادائیگیاں کرنی پڑتی ہیں، چاہے یہ استعمال ہو یا نہ ہو۔	real
1265	کراچی میں امیر یزید کے نعرے لگے تو اگلے دن پھر بین الاقوامی سازش کہہ کر تسلی دی گئی۔ یہ تکلف نہیں کیا گیا کہ بتایا جائے کہ یہ نعرہ کہاں بیٹھ کر کس نے ایجاد کیا۔ دو دن بعد اسلام آباد میں یہ مطالبہ بلند ہوا کہ شیعوں کے ساتھ وہی کیا جائے جو احمدیوں کے ساتھ کیا گیا تھا۔ پڑھیے محمد حنیف کا تازہ کالم۔	real
1266	آل پارٹیز کانفرنس میں پاکستان تحریک انصاف کو برسرِ اقتدار لانے میں اسٹیبلشمنٹ کے مبینہ کردار کے بارے میں تقاریر کے اگلے روز مقامی ذرائع ابلاغ پر آرمی چیف جنرل قمر جاوید باجوہ اور ڈی جی آئی ایس آئی کی پارلیمانی لیڈروں سے ملاقات کی خبریں نشر ہوئیں۔‘ تجزیہ کاروں کا کہنا ہے کہ ان خبروں کا مقصد یہ تاثر دینا ہے کہ تمام سیاسی جماعتیں اور عسکری قیادت ایک پیچ پر ہے۔	real
1267	پنجاب حکومت کے ترجمان فیاض الحسن چوہان نے اپوزیشن جماعتوں کو ’منھ توڑ جواب‘ دینا چاہا لیکن لوگوں کا دھیان ان کی باتوں سے زیادہ ویڈیو میں موجود اسلحے پر گیا۔	real
1268	سنہ 2001 سے لے کر 2016 تک ان کے خلاف 36 مقدمات درج کیے گئے تھے۔ ان میں سے دو کے سوا باقی تمام مقدمات میں ان کی ضمانت منظور کی جا چکی ہے۔	real
1269	دورانِ زچگی بچے کی پیدائش میں تاخیر کے دوران پیشاب اور پاخانے کی نالیوں پر دباؤ آتا ہے جس سے دونوں یا ایک میں سوراخ ہوجاتا ہے جس کو فسٹیولا کہا جاتا ہے اور نو عمری کی شادیوں اور زچگی کے دوران غیر تربیت یافتہ عملے کو فسٹیولا کی ایک بڑی وجہ سمجھا جاتا ہے۔	real
1270	پاکستان کے وفاقی دارالحکومت اسلام آباد میں ملک کی حزب اختلاف کی سیاسی جماعتوں کی حکومت مخالف آل پارٹیز کانفرنس (اے پی سی) کے بعد تیار کردہ ایکشن پلان میں جنوری میں لانگ مارچ کا اعلان کرنے کے ساتھ اسٹیبلشمنٹ سے سیاست میں مداخلت بند کرنے کا مطالبہ کیا ہے۔	real
1271	صحافی لابیز میں سیاستدانوں کو روکتے کہ کوئی اپنی رائے کا اظہار کر لے یا کانفرنس کے ایجنڈے سے متعلق بات کر لے مگر سوالات کی بوچھاڑ میں ان کا جواب صرف ایک مسکراہٹ میں ہی ہوتا۔	real
1272	میاں نواز شریف سمیت ہر رہنما کی تقریر سن کر آنکھیں بھر آئیں۔ غضب خدا کا ایسے مخلص و محب لوگوں کا بھی کوئی دشمن ہو سکتا ہے۔ مگر جب اپنے ہی کہے پر عمل کا موقع آتا ہے تو اجتماعیت تاش کے پتوں کی طرح بکھر جاتی ہے۔ ارکانِ پارلیمان پارٹی قیادت کے احکامات کے برعکس ووٹ دیتے ہیں یا پھر نہیں دیتے۔	real
1273	سابق وزیر اعظم نواز شریف نے اتوار کو حزب مخالف کی جماعتوں کی آل پارٹیز کانفرنس سے اپنی تقریر میں حکمراں جماعت تحریک انصاف اور ’انھیں لانے والوں‘ کو کڑی تنقید کا نشانہ بنایا۔	real
1274	ایوب خان کے اس دورے کو مکمل طور پر خفیہ رکھا گیا اور پاکستان میں بہت کم لوگوں کو اس بات کا علم ہوسکا۔ ایوان صدر میں روزمرہ کے معمول کو سختی سے برقرار رکھا گیا۔ ایوب خان کے لیے صبح کی چائے لے جانے والا اسی طرح برتن سجا کر ان کے کمرے تک لے گیا اور خالی ٹرے واپس لایا۔	real
1275	پاکستان کے سابق وزیراعظم میاں نواز شریف نے سنیچر کی شام سماجی رابطوں کی ویب سائٹ ٹوئٹر پر اپنا اکاؤنٹ بنایا اور ایک ٹویٹ کی۔ جواب میں انھیں جہاں بہت سے لوگوں نے خوش آمدید کہا وہیں ان پر تنقید بھی کی جا رہی ہے۔	real
1276	والد کی پھانسی بعد مرتضیٰ بھٹّو اور ان کے بھائی شاہنواز نے ذوالفقار علی بھٹو کی موت کا بدلہ لینے کی ٹھانی اور مبینہ طور پر ’الذوالفقار‘ نامی تنظیم قائم کی۔ البتہ مرتضیٰ بھٹو کا خاندان اس حوالے سے ان کا دفاع کرتے ہوئے آج تک اس بات کی تردید کرتا ہے کہ ان کا اس نظیم سے کوئی تعلق تھا بھی یا نہیں۔	real
1277	ریپ کے شکار لوگ معاشرے کے نام نہاد اصولوں کے تحت خود ہی چور بن کے رہ جاتا ہے۔ یہی ’ریپ کلچر‘ ہے کیونکہ پورا معاشرہ مل کر اس جرم کی راہ ہموار کرتا ہے۔ پڑھیے آمنہ مفتی کا کالم اڑیں گے پرزے۔	real
1278	پاکستان کے صوبہ بلوچستان میں پولیس حکام کے مطابق ضلع لسبیلہ میں ایک بچے کے ساتھ مبینہ زیادتی کا واقعہ پیش آیا ہے اور اسے کیمیکل مواد سے زخمی بھی کیا گیا ہے۔	real
1279	پاکستانی اداکارہ اور میزبان عفت عمر چند روز سے مسلسل خبروں اور تنقید کی زد میں ہیں اور آئے روز کئی نہ کسی حوالے سے ٹوئٹر پر ان کا نام ٹرینڈ کرتا نظر آتا ہے۔	real
1280	فیڈرل بورڈ آف ریونیو نے سپریم کورٹ کے جج جسٹس قاضی فائزعیسیٰ کی اہلیہ کے ٹیکس سے متعلق جمع کروائے گئے جواب کو مسترد کرتے ہوئے اُنھیں ساڑھے تین کروڑ روپے واجب الادا ٹیکس کی مد میں جمع کروانے کا نوٹس جاری کیا ہے۔	real
1281	پاکستان میں فیڈرل بورڈ آف ریونیو یعنی ایف بی آر کی جانب سے سال 2018 میں ایوان بالا اور ایوان زیریں میں شامل اراکین کے ٹیکس ریٹرن کی ڈائریکٹری بھی جاری کر دی ہے۔ جانیے کس نے سب سے زیادہ ٹیکس دیا اور کس نے خانہ خالی چھوڑ دیا۔	real
1282	پاکستان میں فرقہ وارانہ کشیدگی کوئی نئی بات نہیں ہے لیکن حالیہ چند دنوں میں نہ صرف ملک کے مختلف شہروں میں شیعہ مخالف مظاہروں میں واضح اضافہ دیکھنے میں آیا ہے بلکہ اس کے علاوہ شیعہ علما پر توہین صحابہ کے الزامات عائد کیے گئے اور شیعہ مسلک سے تعلق رکھنے والے افراد کا قتل بھی ہوا۔	real
1283	کراچی کے دو مختلف اداروں کے لیے کی جانے والی تحقیق میں سے ایک تحقیق یہ دعویٰ کرتی ہے کہ کراچی میں کووِڈ کے 95 فیصد متاثرین میں کورونا کی علامات ظاہر نہیں ہوتیں جس کے نتیجے میں ہسپتالوں میں متاثرین کی تعداد میں کمی واقع ہوئی ہے۔	real
1284	پاکستان کے صوبہ پنجاب میں مزید 34 بچوں میں کورونا وائرس کی تشخیص ہوئی ہے جبکہ سندھ میں حکومت نے 21 ستمبر سے چھٹی سے آٹھویں جماعت کے طلبا کے لیے سکول کھولنے کا فیصلہ مزید ایک ہفتے کے لیے موخر کر دیا ہے۔ ملک میں جمعرات کو کورونا کے نئے مریضوں کی تعداد پانچ ہفتے میں سب سے زیادہ رہی ہے۔	real
1285	اٹارنی جنرل آف پاکستان خالد جاوید کے مطابق اس اقدام سے جرمانے کی ادائیگی کے سلسلے میں ملک کو مئی 2021 تک کا ریلیف حاصل ہو گیا ہے اور اب پاکستان ایک نئی قانونی حکمت عملی کے تحت آگے بڑھے گا۔	real
1286	برصغیر میں تجدیدی آرٹ کے بانیوں میں شامل انور جلال شمزا کی وفات کے بعد سنہ 1985 میں ان کے فن پاروں کی سرکاری سطح پر پاکستان میں نمائش کا انعقاد کیا گیا تھا۔ جس کے لیے شمزا کے دس فن پارے برطانیہ سے پاکستان تو آئے مگر واپس نہیں گئے۔	real
1287	پاکستان کے وفاقی تحقیقاتی ادارے یعنی ایف آئی اے نے حکمراں جماعت پاکستان تحریک انصاف کے اہم رہنما جہانگیر ترین کو چینی سکینڈل میں تحقیقات کے لیے 18 ستمبر یعنی جمعے کے روز پیش ہونے کا نوٹس جاری کیا ہے۔	real
1288	اسلام آباد ہائی کورٹ نے سکیورٹی اینڈ سٹاک ایکسچینج پاکستان (ایس ای سی پی) کے جوائنٹ ڈائریکٹر ساجد گوندل کے مبینہ اغوا اور بازیابی کے حوالے سے جوابات کے لیے وزیر اعظم کے مشیر برائے داخلہ امور شہزاد اکبر کو 21 ستمبر کو ذاتی حثیت میں طلب کر لیا ہے۔	real
1289	مارننگ شو ’گڈ مارننگ پاکستان‘ کی میزبان ندا یاسر ابھی پروگرام کی تمہید ہی باندھ رہی تھیں کہ مہمانوں میں موجود ایک برقع پوش خاتون کی سسکیاں سنائی دینے لگیں۔ یہ خاتون اس پانچ سالہ بچی کی والدہ تھیں جسے کراچی میں رواں ماہ مبینہ طور پر اغوا اور ریپ کے بعد قتل کر دیا گیا۔	real
1290	گذشتہ روز پارلیمان کے مشترکہ اجلاس میں ہونے والی قانون سازی کے بعد حزبِ اختلاف کی جماعتوں کا کہنا ہے کہ ایف اے ٹی ایف کی آڑ میں ایسی قانون سازی کی گئی جو انسانی حقوق کی خلاف ورزی کے زمرے میں آتی ہے۔	real
1291	پاکستان کی 60 فیصد آبادی گھروں میں بچوں کی پیدائش کو ترجیح دیتی ہے جبکہ عالمی ادارے یونیسیف کے مطابق دورانِ زچگی صرف 39 فیصد خواتین کے پاس تربیت یافتہ دائی موجود ہوتی ہے۔	real
1292	پاکستان پینل کوڈ 1860 اور کوڈ آف کرمنل پروسیجر 1898 میں ترمیم کرنے کے لیے کرمنل لا (ترمیمی) ایکٹ بل 2020 بھی قومی اسمبلی میں پیش کیا گیا ہے جس کے مطابق مسلح افواج کا تمسخر اڑانا جرم ہو گا۔	real
1293	انڈیا نے پاکستان سے کہا ہے کہ وہ پاکستانی جیل میں قید مبینہ انڈین جاسوس کلبھوشن جادھو کے مقدمے کی پیروی کے لیے کوئنز کاؤنسل ہریش سالوے کو مقرر کرنا چاہتا ہے۔	real
1294	قانونی ماہرین کا کہنا ہے کہ کسی بھی معاشرے میں جرائم کی روک تھام کے لیے سزاؤں کا اذیت ناک اور سنگین ہونا ضروری نہیں بلکہ یہ یقینی بنانا اہم ہے کہ سزا ہوگی۔	real
1295	وزیراعظم عمران خان نے کہا کہ انھوں نے مصباح الحق، اظہر علی اور محمد حفیظ کو بڑی مشکل سے سمجھایا ہے کہ جب بھی آپ ریفارمز کرتے ہیں تو مشکل ضرور آتی ہے۔	real
1296	انسانی حقوق سے متعلق سینیٹ کی قائمہ کمیٹی نے لاہور سیالکوٹ موٹروے ریپ کے مقدمے میں طلب کیے جانے کے باوجود کپیٹل سٹی پولیس افسر لاہور عمر شیخ کے پیش نہ ہونے پر سخت برہمی کا اظہار کیا ہے۔	real
1297	گذشتہ روز اسلام آباد ہائی کورٹ کی جانب سے سابق وزیر اعظم نواز شریف کے ناقابل ضمانت وارنٹ گرفتاری جاری ہونے پر ان کی صاحبزادی مریم نواز کا کہنا ہے کہ انھیں بخوبی اندازہ ہے کہ سیاستدانوں کی طرح معزز جج صاحبان بھی دباؤ کا شکار ہیں۔	real
1298	پاکستان کے سب سے بڑے شہر کراچی کی ایک رہائشی شیریں فیروزپور والا کو بالاخر موٹربائیک کا لائسنس مل گیا ہے۔ گزشتہ روز انہوں نے سماجی رابطوں کی ویب سائیٹ پر شکوہ کیا تھا کہ لائسنس برانچ کے ایک اہلکار نے یہ کہہ کر لائسنس دینے سے انکار کیا تھا کہ ’ہم خواتین کو بائیک کا لائسنس نہیں دیتے۔‘	real
1299	پاکستان کے صوبے پنجاب میں گذشتہ ہفتے ہونے والے ریپ کے واقعے کے بعد سے ملک بھر میں شدید غم و غصے کی لہر دوڑ گئی تھی جس کے بعد عوام کی جانب سے مختلف مظاہرے کیے گئے تھے۔ اسی نوعیت کا ایک اور احتجاج 14 ستمبر کو پیر کے روز کراچی میں پریس کلب کے سامنے منعقد ہوا لیکن اس بار سوشل میڈیا پر تنقید کی توپوں کے گولوں کا رخ معاشرتی برائیوں کے بجائے اس مظاہرے میں شرکت کرنے والوں پر تھا۔	real
1300	روشن ڈیجیٹل اکاؤنٹس کے ذریعے اب نان ریذیڈنٹ پاکستانی بینک برانچ، سفارتخانہ یا قونصلیٹ جائے بغیر ڈیجیٹل اور آن لائن طریقے سے اکاؤنٹ کھول سکیں گے۔ یہ مرحلہ صرف 48 گھنٹوں میں مکمل ہو سکے گا۔	real
1301	پاکستان میں کورونا کے پھیلاؤ کے خدشات کے پیشِ نظر ملک بھر میں 13 مارچ سے تمام شادی ہالز بند کر دیے گئے تھے، تاہم اب حالات بہتر ہونے پر حکومت کی جانب سے یہ فیصلہ کیا گیا کہ انھیں دوبارہ کھول دیا جائے۔	real
1302	بی بی سی کے ساتھ خصوصی گفتگو میں پنجاب فرانزک سائنس ایجنسی کے ڈائریکٹر جنرل ڈاکٹر محمد اشرف طاہر نے ان تمام واقعات کا احاطہ کیا ہے جن کی مدد سے پولیس اور قانون نافذ کرنے والے ادار ے ملزمان تک جلد پہنچنے میں کامیاب ہوئے۔	real
1303	جمرود میں کم از کم 80 دن سے دھرنا دے رہے مظاہرین کا تعلق کوکی خیل قبیلے سے ہے اور یہ باب خیبر سے 80 کلومیٹر دور وادی تیراہ میں واقع اپنے علاقے راجگل واپس جانا چاہتے ہیں۔	real
1304	صوبہ پنجاب کے دارالحکومت لاہور کی انسداد دہشت گردی عدالت نے سیالکوٹ موٹر وے پر دوران ڈکیتی خاتون سے زیادتی کے ملزم کا 14 روزہ جوڈیشل ریمانڈ دیتے ہوئے انھیں جیل منتقل کرنے کا حکم دیا ہے۔	real
1305	قومی اسمبلی کی کارروائی کے دوران شہباز شریف کو یہ کہتے سنا جا سکتا ہے کہ ’چونکہ یہ اندوہناک واقعہ سیالکوٹ موٹروے پر پیش آیا، تو میں سمجھتا ہوں کہ یہاں پر یہ کہنا غیر مناسب نہیں ہو گا کہ یہ موٹروے میاں نواز شریف کی سربراہی میں مسلم لیگ (ن) نے بنائی۔‘	real
1306	پاکستان کے معروف صحافی اور سیاسی تجزیہ کار سہیل وڑائچ کی تحریر کردہ ایک کتاب گذشتہ شام مارکیٹ میں متعارف کروائی گئی تھی تاہم اطلاعات کے مطابق اسے پہلے روز ہی پاکستان کے کچھ ریاستی اداروں کی جانب سے اعتراض کے بعد دکانوں سے ہٹا دیا گیا ہے۔	real
1307	ہر گزرتے دن کے ساتھ خوف کے سائے گہرے ہو رہے ہیں۔ خوف کا سبب جرائم کی شرح نہیں وہ انکار ہے جس کا شکار ریاست ہو چکی ہے، وہ افراد ہیں جو مظلوم کو قصوروار ٹھرا دیتے ہیں۔ پڑھیے عاصمہ شیرازی کا کالم	real
1308	پنجاب میں ہر ماہ ریپ کے 292 یعنی ہر روز لگ بھگ ریپ کے دس مقدمات درج ہوتے ہیں جبکہ دوسری جانب قانونی ماہرین کا دعویٰ ہے کہ صوبے میں ریپ کے واقعات کی اصل تعداد باقاعدہ رپورٹ ہونے والے کیسز سے کہیں زیادہ ہے۔	real
1309	پاکستان کے وزیر اعظم عمران خان نے کہا ہے کہ قانون میں قتل کی طرح جنسی جرائم کی بھی درجہ بندی ہونی چاہیے اور ریپ کے مجرموں کو جنسی طور پر ناکارہ بنا دیا جانا چاہیے۔	real
1310	پاکستان کے شہر راولپنڈی کی پولیس نے سوشل میڈیا پر پاکستانی اداروں بالخصوص فوج کے خلاف ہرزہ سرائی کرنے، پوسٹس اور تبصرہ کرنے کے الزام میں صحافی اسد طور کے خلاف مقدمہ درج کر لیا ہے۔ یہ پاکستان میں کسی صحافی پر درج کیا جانے والا ایسا تیسرا مقدمہ ہے۔	real
1311	طبّی ماہرین کا کہنا ہے کہ دورانِ حمل بہت سی حاملہ خواتین بلڈ پریشر کے معاملے کو تو مسئلہ سمجھتی ہیں لیکن ذیابیطس کو کنٹرول کرنے پر توجہ نہیں دی جاتی، جس کی وجہ سے زچہ و بچہ دونوں ہی کے لیے مسائل پیدا ہوتے ہیں۔	real
1312	اسلام آباد ہائی کورٹ کی طرف سے مبینہ طور پر جبری گمشدگی کے ایک واقعہ کا نوٹس لینے کے بعد، آٹھ ماہ قبل وفاقی دارالحکومت سے لاپتہ ہونے والا شخص اپنے گھر پہنچ گیا ہے۔	real
1313	جہاں افغانستان میں گذشتہ کئی دہائیوں سے جاری جنگ کے بعد بین الافغان مذاکرات شروع ہونے پر پوری دنیا سے مثبت رد عمل سامنے آ رہا ہے وہیں اسی حوالے سے پاکستان مسلم لیگ (ن) کے رہنما خواجہ آصف اپنی ایک ٹویٹ کی وجہ سے شدید تنقید کی زد میں ہیں۔	real
1314	افغانستان طالبان امن مذاکرات میں انڈیا بھی گہری دلچسپی رکھتا ہے اور چاہتا ہے کہ دونوں کے مابین ہونے والے مذاکرات کامیاب ہوں لیکن انڈیا کو خدشات بھی لاحق ہیں۔	real
1315	حکومت کے جاری کردہ ایس او پیز پر سکول اور دیگر تعلیمی ادارے عملدرآمد کروانے کے لیے کتنے تیار ہیں؟ یہ جاننے کے لیے بی بی سی نے لاہور کے چند سرکاری اور نجی سکولوں کا دورہ کیا۔	real
1316	ایف اے ٹی ایف کے 14 سے 21 ستمبر کو ہونے والے اجلاس میں اس بات کا جائزہ لیا جائے گا کہ اُن 13 معاملات پر پاکستان نے کتنی پیش رفت کی ہے جن پر تحفظات تھے۔ اس کے بعد اکتوبر کے اجلاس میں پاکستان کے بارے میں فیصلہ کیا جائے گا۔	real
1317	آج منظر یہ ہے کہ لاہور سیالکوٹ موٹر وے ریپ کیس پر بڑے شہروں میں صرف خواتین کے جلوس نکل رہے ہیں جیسے یہ صرف انھی کا مسئلہ ہو۔ ہر قومیت، فرقے، مسلک اور زبان بولنے والے کو اپنے اپنوں کے سوا اردگرد کے دیگر مسائل زدہ پاکستانی طبقات نظر آنے بند ہوتے چلے گئے ہیں۔	real
1318	پاکستان میں توجہ حاصل کرنے کے لیے کوئی چینل بازی لے جاتا ہے تو کوئی سب سے بڑی خبر اور بریکنگ نیوز کے دعوے سے سکرین کا رنگ لال پیلا کر دیتا ہے۔ چینل کی ریٹنگ بڑھانے کے لیے رپورٹرز پر بھی دباؤ رہتا ہے اور وہ خود سے بھی نئے نئے طریقے ایجاد کرتے نظر آتے ہیں۔ کیا اصل میں میڈیا کے ضابطہ اخلاق میں درج کیا ہے۔	real
1319	وزیراعظم عمران خان کے معاونِ خصوصی برائے سیاسی روابط ڈاکٹر شہباز گل سے تو آپ واقف ہی ہوں گے۔۔۔ شہباز صاحب سوشل میڈیا پر ایک خاصی مشہور شخصیت ہیں اور اپنی ٹویٹس کے باعث اکثر خبروں میں بھی رہتے ہیں۔	real
1320	پاکستان کے صوبہ پنجاب میں لاہور کے قریب ایک خاتون کے ریپ کے واقعے کے بعد پولیس کی جانب سے نامزد ہونے والے دو ملزمان میں سے ایک نے گرفتاری دے دی ہے تاہم وہ اس جرم سے انکاری ہے جبکہ پولیس کا کہنا ہے کہ واقعے کی تفتیش کی جا رہی ہے اور ملزم کا ڈی این اے ٹیسٹ لے لیا گیا ہے۔	real
1321	عورت اکیلی ہو، جوان ہو، بوڑھی ہو، کمسن ہو، خوب صورت ہو یا بد صورت، وقت دیکھ کے گھر سے نکلی ہو یا بے وقت، بلکہ گھر سے بھی نہ نکلی ہو تب بھی ہر طرح کے جسمانی اور ذہنی تشدد کی تلوار اس کے سر پر منڈلاتی رہتی ہے۔ پڑھیے آمنہ مفتی کا کالم	real
1322	جنرل سیکرٹری انجمن مزارعین پنجاب مہر عبدالستار کو لاہور ہائی کورٹ کے دو رکنی ڈویژنل بینچ نے آٹھ ستمبر کو ان پر لگائے مختلف مقدمات میں سے آخری مقدمے میں بھی بری کر دیا جس کے بعد 12 ستمبر یعنی ہفتے کے روز انھیں بالآخر چار سال کے بعد رہائی مل گئی۔	real
1323	لیکن دنیا کے لیے حیران ُکن یہ امر بھی ہے کہ لوگوں کی لاپرواہی اور حکومت کی نرمی کے باوجود پاکستان میں کورونا کا پھیلاو کافی محدود رہا۔	real
1324	موٹروے پر خاتون کے ساتھ مبینہ ریپ اور ڈکیتی کے واقعے کے بعد لوگوں میں یہ تشویش بھی بڑھ رہی ہے کہ ایسے میں سوشل میڈیا پر متاثرہ افراد کی ذاتی معلومات جاری کر دی جاتی ہے جو کہ اخلاقی اور قانونی اعتبار سے درست نہیں۔	real
1325	حفیظ اللہ محمد حسنی کی جبری گمشدگی کے بعد سکیورٹی فورسز کے ایک میجر نے ان کے خاندان سے 68 لاکھ روپے کے عوض انھیں چھوڑنے کی یقین دہانی کروائی تھی تاہم اب ان کی لاش برآمد ہوئی ہے۔	real
1326	بانی پاکستان محمد علی جناح کی وفات صرف 72 سال پرانا واقعہ ہے مگر اب بھی ان سے وابستہ کچھ واقعات ایسے ہیں جن کی تفصیلات واضح نہیں۔ وہ چاہے ان کی تنخواہ کا معاملہ ہو یا نمازِ جنازہ کا کسی سوانح عمری میں کوئی واقعہ ملتا ہے اور کسی سوانح عمری میں کچھ اور۔	real
1327	مہمند ایجنسی میں پیر کو سنگ مرمر کی کان پر پہاڑی تودے گرنے سے اب تک کم از کم 24 افراد کے ہلاک اور 9 افراد کے زخمی ہونے کی تصدیق ہوئی ہے۔ مقامی لوگوں کے مطابق لگ بھگ 8 سے 10 افراد اب بھی لاپتہ ہیں۔	real
1328	قانون نافذ کرنے والوں کی طرف سے یہ کہا جانا کہ رات گئے، اکیلے سفر کرتے ہوئے موٹروے پر مبینہ طور پر ریپ کا شکار ہونے والی خاتون کو دوسرے راستے سے جانا چاہیے تھا یا پھر پیٹرول نہ ہونا ان کی کوتاہی کا نتیجہ تھا، اس سے کیا پیغام ملتا ہے؟	real
1329	نیب لاہور کے ترجمان ذیشان انور نے بتایا کہ ملزم کے گھر سے چھاپے کے دوران 33 کروڑ روپے کیش اور پرائز بانڈ کی صورت میں برآمد کیے گئے ہیں۔	real
1330	اسلام آباد ہائی کورٹ نے العزیزیہ ریفرنس میں سابق وزیر اعظم نواز شریف کے عدالت کے سامنے سرینڈر کیے بغیر کارروائی آگے بڑھانے کی درخواست پر دلائل طلب کرتے ہوئے کہا ہے کہ نواز شریف نے سرینڈر نہیں کیا عدالت انھیں کوئی استثنی نہیں دے گی۔	real
1331	پاکستان میں صوبہ سندھ میں ضلع خیر پور کے قریب دیہات سیلاب کے پانی کی زد میں ہیں اور پیر جو گوٹھ کے مقام پر کشتی الٹنے کے ایک واقعے میں دو بچیاں ہلاک بھی ہوئی ہیں۔	real
1332	پاکستان میں گذشتہ چند دنوں کے دوران ریپ اور ہراسانی کے متعدد واقعات پیش آنے کے بعد لوگ یہ سوال کر رہے ہیں کہ آیا پاکستان خواتین اور بچوں کے لیے ایک محفوظ ملک ہے۔	real
1333	کچھ عرصہ پہلے تک صوبہ بلوچستان کے ضلع کیچ کے ایک چھوٹے سے گاؤں بلیدہ میں منشیات باآسانی اور ارزاں نرخوں پر دستیاب تھی مگر پھر وہاں کی خواتین آگے بڑھیں اور منشیات کے انسداد کی مہم شروع کی جسے دیکھتے ہی دیکھتے عوامی پزیرائی حاصل ہوئی۔	real
1334	30 برس کی خیرالنسا کی لاش پیر کی صبح گلگت بلتستان کے سرحدی علاقے تھونگموس سے ملی۔ تھونگموس سب ڈویژن چھوربٹ میں گلگت بلتستان کو انڈیا کے زیرانتظام لداخ سے ملانے والے آخری گاؤں فرانو کے قریب واقع ہے۔	real
1335	سابق وزیر اعظم میاں نواز شریف کے وکلا نے اسلام آباد ہائی کورٹ سے استدعا کی ہے کہ عدالت العزیزیہ سٹیل ملز ریفرنس میں اُن کے موکل کی اپیل پر اُن کی عدم موجودگی میں سماعت جاری رکھے کیونکہ نواز شریف کی صحت اس بات کی اجازت نہیں دیتی کہ وہ بیرون ملک سے اپنا علاج چھوڑ کر پاکستان میں عدالت کے روبرو پیش ہوں۔	real
1336	پنجاب کے صوبائی دارالحکومت لاہور کی ایک عدالت نے توہین رسالت کے الزام میں ایک مسیحی شہری کو موت کی سزا سنائی ہے۔ ملزم آصف مسیح پر ان کے ساتھ کام کرنے والے ایک شخص نے توہین آمیز پیغامات بھیجنے کا الزام لگایا تھا۔	real
1337	پاکستان کے ایوان زیریں یعنی قومی اسمبلی کی انسانی حقوق سے متعلق قائمہ کمیٹی نے بچوں کے ساتھ ہونے والے غیر انسانی سلوک کے واقعات کی تفتیش کی نگرانی کسی مرد کی بجائے خاتون پولیس افسر سے کروانے کی منظوری دے دی ہے۔	real
1338	وزیر اعظم عمران خان کے ساجد گوندل کی بازیابی کے لیے تین رکنی کمیٹی تشکیل دیے جانے کے چند گھنٹوں کے اندر ہی ساجد گوندل بازیاب ہو گئے۔ ان کی بازیابی کی خبر پاکستانی میڈیا پر ذرائع سے چلی، جس کے کچھ ہی دیر بعد ساجد گوندل کا ایک ٹویٹ بھی سامنے آیا جس میں انھوں نے اپنی بازیابی کی تصدیق کی۔	real
1339	بین الاقوامی قوانین کے مطابق پاکستان کی سمندری حدود کہاں تک ہیں اورسمندری حدود کا تعین کیسے کیا جاتا ہے؟	real
1340	صرف فرقہ واریت ہی نہیں صوبائیت اور علاقائیت نے بھی اپنے پنجے گاڑنے شروع کر دیے ہیں۔ ذرا ذرا سی بات پر وفاق کے صوبوں کو طعنے اور عوام میں گہرے بیج بوتے تعصبات ایک خوفناک منظر پیش کر رہے ہیں: پڑھیے عاصمہ شیرازی کا کالم	real
1341	پیر کو وفاقی وزیر تعلیم شفقت محمود کی زیر صدارت بین الصوبائی وزراء تعلیم کانفرنس میں فیصلہ کیا گیا کہ 15 ستمبر سے پاکستان بھر میں سرکاری و نجی تعلیمی ادارے کھول دیے جائیں گے۔ تاہم فوری طور پر ہر جماعت کے طالب علموں کو 15 ستمبر سے سکول نہیں بلایا جائے گا۔	real
1342	اسلام آباد ہائی کورٹ نے امریکی شہری اور بلاگر سنتھیا رچی کو فوری ملک بدر کرنے سے متعلق وزارت داخلہ کے فیصلے پر عمل درآمد کو روک دیا ہے۔	real
1343	جنوبی سندھ کے اضلاع سانگھڑ، میرپورخاص، عمرکوٹ اور بدین کے متاثرین کی نہ صرف فصلیں تباہ ہوئی ہیں بلکہ ان بے گھر ہونے والے شہریوں کو پینے کے پانی اور خیموں کی فراہمی بھی ایک بڑا مسئلہ ہے۔	real
1344	پاکستان کے بانی محمد علی جناح نے تیرہ اپریل 1948 کو رائل پاکستان ایئرفورس رسالپور کا دورہ کیا تو اس موقع پر کہا تھا کہ پاکستان کو دنیا کی بہترین ایئرفورس قائم کرنی چاہیے۔	real
1345	بیسویں صدی کے نصف اول میں جب برصغیر کا گوشہ گوشہ آزادی کے نعروں سے گونج رہا تھا، ایپی فقیر اُس زمانے میں کچھ ایسے غیر معروف بھی نہیں تھے۔	real
1346	پاکستان میں ستر فیصد خواتین اینیمیا کا شکار ہوتی ہیں اور ان میں پڑھی لکھی کھاتے پیتے گھرانوں کی خواتین بھی شامل ہوتی ہیں۔ آخر ایسا کیوں ہے اور اس سے کیسے بچا جا سکتا ہے؟	real
1347	بلوچستان کے ضلع کیچ سے تعلق رکھنے والی معروف خاتون سماجی کارکن، مصورہ اور صحافی شاہینہ بلوچ کے قتل کے مقدمے ان کے شوہر کو نامزد کیا گیا ہے جو گذشتہ روز انھیں زخمی حالت میں ہسپتال لے کر آئے اور پھر روپوش ہو گئے۔	real
1348	اسلام آباد ہائی کورٹ نے قرار دیا ہے کہ اسلام آباد کے چودہ سو سکوائر میل کے علاقے میں اغوا کے بڑھتے ہوئے واقعات انتہائی تشویشناک ہیں اور ان واقعات سے گورننس اور شہریوں کے بنیادوں حقوق پر کئی سوالات اٹھتے ہیں، قانون کی موثر اطلاق اور شہریوں کے تحفظ کی ذمہ دار وفاقی حکومت ہے۔	real
1349	پاکستان میں سکولی نصاب کے مطابق بھارت نے چھ ستمبر کو رات کی تاریکی میں چھپ کر پاکستان پر حملہ کیا۔ مگر کیوں کیا؟ بھارت پر اچانک کوئی دماغی دورہ پڑا یا حملے کی کوئی خاص وجہ تھی ؟ بچوں کو اس بابت کچھ نہیں بتایا جاتا۔ اور نہ ہی یہ بتایا جاتا ہے کہ اسے کامیاب جنگ کیوں کہا جاتا ہے؟ پڑھیے وسعت اللہ خان کا کالم بات سے بات۔	real
1350	کامیڈین یاسر حسین کے ایک بیان پر انھیں ارطغرل کے فینز کی جانب سے تنقید کا سامنا ہے۔ انھوں نے کہا تھا کہ ’گھر کی مرغی دال برابر اور باہر کا کچرا بھی مال برابر۔' لیکن بعد میں انھوں نے واضح کیا تھا کہ ان کا اشارہ ارطغرل کی کاسٹ کی طرف نہیں تھا۔	real
1351	پاکستانی حکومت آج کل کاون کو کمبوڈیا بھیجنے کی تیاریوں میں مصروف ہے جبکہ ماہرین یہ سوال اٹھا رہے ہیں کہ آیا کاون کی 35 برس بعد کسی دوسرے ملک منتقلی کاون کے فائدہ مند ہے بھی یا نہیں۔	real
1352	مردوں کی مالی بے ضابطگیوں پر گھر کی خواتین کی تصاویر اور ان کے نام اچھلتے دیکھ کر اتنا ہی دکھ ہوتا ہے جتنا ملازمت پیشہ، کاروبار کرنے والی یا کسی نہ کسی طرح سماج میں اپنی موجودگی کا ثبوت دینے والی خواتین کے لیے 'دو نمبر عورت' کا خطاب دیکھ کر ہوتا ہے۔	real
1353	وزیر اعظم عمران خان نے ملک کے سب سے بڑے شہر کراچی کے لیے '110 ارب روپے کی مالیت کے ایک تاریخی پیکج' کا اعلان کیا ہے جس میں وفاقی اور صوبائی حکومت دونوں کا تعاون شامل ہوگا۔ تاہم بعض ماہرین اس پیکج کے حقیقت پسندانہ ہونے سے متعلق سوال کر رہے ہیں۔	real
1354	پشتون تحفظ موومنٹ کے رہنما اور رکن قومی اسمبلی محسن داوڑ کو حکام نے بلوچستان بدر کر کے واپس اسلام آباد بھیج دیا ہے۔ محسن داوڑ نے اپنے ساتھ پیش آنے والے اس واقعے کو افسوسناک، غیر جمہوری اور غیر انسانی قرار دیا ہے۔	real
1355	صوبہ بلوچستان کی عدالت نے بلوچستان اسمبلی کے سابق رکن اور پشتونخوا میپ کے رہنما مجید خان اچکزئی کو ٹریفک سارجنٹ کی ہلاکت کے مقدمے میں بری کردیا ہے جس پر سوشل میڈیا پر شدید ردِ عمل سامنے آ رہا ہے۔	real
1356	عمران خان نے اپنے بیان میں کہا ہے کہ معمولی نوعیت کے جرائم میں ملوث خواتین قیدیوں کی رہائی کی ہدایات وزارت انسانی حقوق اور اٹارنی جنرل سے مشاورت کے بعد جاری کی گئی ہیں۔	real
1357	پاکستان کے سابق لیفٹ آرم سپنر اقبال قاسم نے پاکستان کرکٹ بورڈ کی کرکٹ کمیٹی کے چیرمین کے عہدے سے استعفی دے دیا ہے اور پاکستانی کرکٹ بورڈ نے ان کا استعفیٰ منظور کرلیا ہے۔	real
1358	ایس ایچ او مہمند سردار حسین کے مطابق زیبا بی بی نے بتایا کہ وہ جمعے کو دوپہر کے وقت اپنے گھر کے باہر اپنے مویشیوں کو پانی پلا رہی تھی کہ دو نامعلوم نقاب پوش افراد ان کے پاس آئے اور ایک نے ان پر فائرنگ کر دی۔	real
1359	وزیرِاعظم پاکستان کے معاونِ خصوصی برائے اطلاعات لیفٹیننٹ جنرل (ریٹائرڈ) عاصم سلیم باجوہ نے جب اپنا استعفیٰ وزیر اعظم عمران خان کے سامنے پیش کیا تو انھوں نے کہا کہ وہ ان کی وضاحت سے مطمئن ہیں اور کام جاری رکھنے کی ہدایت کی۔ اس پر مسلم لیگ (ن) کی رہنما مریم نواز شریف نے لکھا کہ: 'احتساب کا بیانیہ اپنی موت آپ مر گیا۔ استعفیٰ منظور کر لیتے تو خود بھی مستعفی ہونا پڑ جاتا۔	real
1360	پاکستان میں چین کے سفیر یاؤ جنگ کا کہنا ہے کہ چین کے صدر شی جن پنگ کا دورہ پاکستان کورونا کی وبا کی وجہ سے ملتوی کیا گیا ہے۔ سفیر کے مطابق دونوں ممالک پاک چین راہداری کے منصوبے سی پیک کو درپیش چیلنجز سے بخوبی آگاہ ہیں اور دونوں مل کر ہی ان کا مقابلہ کریں گے۔	real
1361	وزیرِ اعظم پاکستان کے دفتر کے مطابق عمران خان نے جمعرات کو مستعفی ہونے والے معاونِ خصوصی برائے اطلاعات لیفٹیننٹ جنرل (ر) عاصم سلیم باجوہ کا استعفیٰ قبول کرنے سے انکار کرتے ہوئے انھیں کام جاری رکھنے کو کہا ہے۔	real
1362	پاکستان کے وزیر خارجہ شاہ محمود قریشی نہ تو اپنے خاندان کے پہلے ’شاہ محمود‘ ہیں اور نہ ہی اپنے خاندان میں اعلیٰ عہدے پر متمکن ہونے والے پہلے فرد ہیں۔	real
1363	عام طور پر پاکستانی معاشرے میں خواتین سے امید کی جاتی ہے کہ وہ ’عمر بڑھنے‘ سے پہلے شادی کرلیں جبکہ ان کی پڑھائی یا کیریئر کو ثانوی حیثیت دی جاتی ہے۔	real
1364	اقوامِ متحدہ کی سکیورٹی کونسل نے پاکستان کی جانب سے دو انڈین شہریوں کو دہشتگرد قرار دینے کی درخواست کو مسترد کر دیا ہے۔ پاکستان کے دفترِ خارجہ نے سکیورٹی کونسل کے فیصلے پر افسوس کا اظہار کرتے ہوئے کہا کہ 'کچھ ارکان نے دو انڈین شہریوں کو پابندیوں کی فہرست میں شامل کرنے کی کوشش کو روک دیا۔'	real
1365	اٹارنی جنرل خالد جاوید خان نے عدالت کو بتایا کہ چھ اگست 2020 کو مبینہ انڈین جاسوس کلبھوشن جادھو اور انڈین حکومت کو اس بارے میں آگاہ کر دیا گیا تھا تاہم ابھی تک حکومت کو انڈین وزارت خارجہ کی طرف سے جواب موصول نہیں ہوا۔	real
1366	پاکستانی وزیر اعظم نے قطری خبر رساں ادارے الجزیرہ کو انٹرویو دیتے ہوئے کہا ہے کہ ملک میں کسی حکومت کے فوج کے ساتھ اس طرح کے تعلقات نہیں رہے جیسے ان کے ہیں اور یہ کہ فوج تمام پالیسیوں پر حکومت کے ساتھ کھڑی ہے۔	real
1367	ماہرین معیشت کے نزدیک سٹاک مارکیٹ ایک بہت محدود پیمانے پر ملکی اقتصادی صورت حال کی تصویر پیش کرتی ہے۔ کی سٹاک مارکیٹ میں چھوٹے سرمایہ کاروں سے لے کر بڑی کمپنیوں کی لسٹنگ کی شرح دنیا کے مقابلے میں بہت کم ہے۔	real
1368	انڈیا اور چین کے درمیان سرحدی کشیدگی کے دوران انڈیا میں حالیہ پابندی سے متاثر ہونے والی چینی ایپس میں موبائل ویڈیو گیم ’پب جی‘ اور میسجنگ ایپ ’وی چیٹ ورک‘ شامل ہیں۔	real
1369	1965 کی جنگ کی وہ داستان جب لاہور پر حملہ کرنے والی انڈین فوج کی ناکامی کے بعد ایک کمانڈر جان بچانے کے لیے کھیتوں میں چپ گئے تھے اور اہم دستاویزات بھی گاڑی میں چھوڑ کر بھاگ گئے تھے۔	real
1370	سوات میں پیر جان کا گھر گذشتہ ہفتے سیلاب ریلے میں بہہ گیا۔ اس وقت ان کے گھر میں خاندان کے 11 افراد موجود تھے۔ ان کا بڑا بیٹا وطن لوٹنے پر اسی صدمے میں ہے۔	real
1371	پاکستان میں بہت سے لوگوں میں فیملی پلاننگ کے طریقوں کے حوالے سے بہت سی غلط فہمیاں پائی جاتی ہیں۔	real
1372	پاکستان کے سب سے بڑے شہر کراچی کے علاقے ڈیفینس ہاؤسنگ اتھارٹی اور کلفٹن سے بارش کے پانی کی عدم نکاسی اور بجلی کی عدم فراہمی کے خلاف احتجاج کرنے والے بعض افراد کے خلاف ہنگامہ آرائی کے الزام میں ’دہشت گردی‘ کا مقدمہ درج کیا گیا ہے تاہم کوئی گرفتاری عمل میں نہیں آئی ہے۔	real
1373	بحرین کے افسر خان کی وہ ویڈیو سوشل میڈیا پر وائرل ہو رہی ہے جس میں وہ منگل کو اونچے درجے کے سیلاب اور تیز رفتار لہروں کے دوران پانی سے تباہ ہونے والے ملبے کے پاس کھڑے ہیں اور اردگرد موجود لوگ شور مچا رہے ہیں۔	real
1374	کراچی میں میٹروپولیٹن کارپوریشن کے حکام نے بدھ کی صبح گجر نالے پر قائم غیر قانونی تجاوزات ہٹانے کا آغاز کیا، جس میں ہتھوڑوں سے دیواریں گرائی گئیں جبکہ کے الیکٹرک اور سوئی سدرن گیس کمپنی نے رہائشیوں کے کنیکشن منقطع کر دیے ہیں۔	real
1375	وفاقی وزارتِ داخلہ نے امریکی شہری سنتھیا ڈی رچی کے ویزے میں توسیع کی درخواست کو مسترد کرتے ہوئے انھیں 15 روز میں پاکستان چھوڑنے کا حکم دیا ہے۔	real
1376	وفاقی وزیر سائنس و ٹیکنالوجی فواد چوپدری نے کہا ہے کہ بھنگ کینسر سمیت ان دیگر بیماریوں کی ادویات بنانے کے لیے استعمال ہوگی جن میں مریض شدید درد کے شکار ہوجاتے ہیں۔	real
1377	پاکستان کرکٹ کے سابق کپتان اور وکٹ کیپر سرفراز احمد پر کافی عرصے سے سوشل میڈیا صارفین سے لے کر کرکٹ کے تجزیہ کار تک تقریباً سبھی تنقید کرتے آ رہے ہیں اور اس مسلسل تنقید پر بالآخر سابق کپتان نے خاموشی توڑ ہی دی۔	real
1378	مسلم لیگ ن کے صدر اور قومی اسمبلی میں قائدِ حزبِ اختلاف شہباز شریف نے وزیراعظم عمران خان سے مشیرِ اطلاعات اور سی پیک اتھارٹی کے سربراہ عاصم سلیم باجوہ کے خاندان کے اثاثوں سے متعلق رپورٹ کا نوٹس لینے اور قوم کو اس بارے میں جواب دینے کا مطالبہ کیا ہے۔	real
1379	گذشتہ روز پی ٹی اے کی جانب سے سوشل میڈیا پر جاری ایک پریس ریلیز میں اس اعلان کے بعد سے کچھ صارفین برہمی کا اظہار کر رہے ہیں جبکہ جو افراد اس فیصلے کی حمایت کر رہے ہیں ان میں سے ایسے بھی ہیں جن کا ٹنڈر پر تجربہ اچھا نہیں رہا۔	real
1380	حالیہ بارشوں کی وجہ سے کپاس کی فصل کو سب سے زیادہ نقصان عمر کوٹ، میرپور خاص، سانگھڑ، بدین، مٹھی اور نواب شاہ کے اضلاع میں پہنچا۔ صوبے میں کپاس کی پیداوار میں 40 فیصد تک کمی جبکہ ٹیکسٹائل برآمدات میں واضح کمی کا خدشہ ہے۔	real
1381	خیبر پختونخوا کے حکام کے مطابق صوبے کے بالائی اضلاع میں شدید بارشوں کی وجہ سے دریاؤں اور ندی نالوں میں پانی کی سطح بلند ہے جبکہ دریائے سوات اور دریائے پانچکوڑہ میں اونچے درجے کا سیلاب ہے۔ کالام، بحرین اورمدین میں سیاحوں کو محفوظ طریقے سے علاقہ چھوڑنے کی ہدایت کی گئی ہے۔	real
1382	پاکستان ٹیلی کمیونیکیشن اتھارٹی کے مطابق کمپنیوں کی انتظامیہ کی جانب سے ’مناسب لائحہ عمل کے تحت غیر اخلاقی اور غیر مہذب مواد کو مقامی قوانین پر عمل کرتے ہوئے ماڈریٹ کرنے کی یقین دہانی کرائے جانے پر‘ فیصلے پر نظرثانی کی جا سکتی ہے۔	real
1383	کورونا وائرس کے دنوں میں فضائی سفر مشکل سے مشکل تر ہوتا جا رہا ہے اور بہت سے لوگ بذریعہ سڑک بین الاقوامی سفر کرنے کا بھی سوچ رہے ہیں۔ کئی پاکستانی تو انگلینڈ سے بذریعہ کار کے پاکستان کا سفر کر آئے ہیں لیکن یہ سب پہلی بار نہیں ہو رہا۔۔۔	real
1384	اسلام آباد ہائی کورٹ نے سابق وزیر اعظم نواز شریف کو 10 ستمبر کو عدالت طلب کر لیا ہے جہاں ایون فیلڈ اور العزیزیہ ریفرنس میں ان کی اپیلوں کی سماعت ہو گی۔ دوسری جانب مریم نواز اور داماد کیپٹن صفدر کی اپیلوں کا معاملہ علیحدہ کر دیا گیا ہے اور ان کی سماعت اب 23 ستمبر کو ہو گی۔	real
1385	وزیرِ اعظم کی راہ تکتے کراچی کے عوام کے لیے خوشخبری یہ ہے کہ عمران خان بلآخر جمعرات کے روز کراچی پہنچ رہے ہیں لیکن اس سے قبل مسلم لیگ (ن) کے صدر میاں شہباز شریف بھی بدھ کے روز کراچی تشریف لائیں گے۔	real
1386	قرضوں اور مہنگائی کی بلند ترین شرح، بیروزگاری اور دن بہ دن کمزرور ہوتی مملکت کا حل شاید پارلیمانی نظام کے خاتمے اور صدارتی نظام کے نفاذ میں ہی چھپا ہو لیکن عوام کو یہ تو بتایا جائے کہ اس وقت پاکستان میں کون سا نظام رائج ہے؟ پڑھیے عاصمہ شیرازی کا کالم	real
1387	قادو مکرانی انگریز سرکار کے لیے ’سرکش ڈاکو‘ جبکہ مقامی لوگوں کے لیے وطن کا رکھوالا اور امیروں سے دولت لوٹ کر غریبوں میں تقسیم کرنے والا تھا، یہ ہی وجہ ہے کہ کاٹھیا واڑ کے لوک گیتوں میں آج بھی قادو مکرانی کا نام زندہ ہے۔	real
1388	کراچی میں شدید بارشوں کے تنیجے میں کاروبار کو بہت زیادہ نقصان پہنچا ہے۔ کراچی کی شاہراہ فیصل پر واقع فرنیچر مارکیٹ بھی سب سے زیادہ متاثرہ علاقوں میں شامل ہے، جہاں دکاندار اس وقت دکانوں سے صفائی اور متاثرہ فرنیچر کو کباڑ کی صورت میں باہر پھینک رہے ہیں۔	real
1389	پاکستان میں نیشنل ڈیزاسٹر مینجمنٹ اتھارٹی (این ڈی ایم اے) کے مطابق یکم اگست سے تیس اگست تک ملک بھر میں مون سون بارشوں سے ہلاک ہونے والوں کی تعداد کم از کم 116 ہوچکی ہے۔	real
1390	پاکستان میڈیا ریگولیٹری اتھارٹی (پیمرا) نے دس محرم الحرام کی خصوصی ٹرانسمیشن کے دوران مبینہ طور پر نفرت انگیز مواد نشر کرنے پر ایک نجی ٹی وی چینل کا لائسنس معطل کر دیا ہے۔	real
1391	پاکستان کے سب سے بڑے شہر کراچی کے پوش علاقے ڈیفینس اور کلفٹن سے بارش کے پانی کی نکاسی اور بجلی کی عدم فراہمی کے خلاف ان علاقوں کے رہائشیوں کی جانب سے کنٹونمٹ بورڈ کے باہر احتجاج جاری ہے۔	real
1392	کورونا وائرس نے جہاں دنیا بھر میں معاشی اور معاشرتی سرگرمیوں کو متاثر کیا ہے وہیں اس کے باعث بچوں کے حفاظتی ٹیکوں کے پروگرام میں بھی خلل پڑا ہے جبکہ پاکستان میں ان پروگرامز کو بحال کیا جا چکا ہے۔	real
1393	انگلینڈ نے پاکستان کو دوسرے ٹی 20 میچ باآسانی پانچوں وکٹوں سے ہرا دیا ہے۔ انگلینڈ کی فتح میں کپتان ایئن مورگن اور ڈیوڈ ملان کی عمدہ شراکت نے اہم کردار کیا ہے۔	real
1394	سرخ رنگ ہر دور میں ایک نئے انداز میں تازہ ولولے کے ساتھ ابھرتا ہے اور رفتہ رفتہ جب اس پر مصلحتی سیاہ رنگ غالب آنے لگتا ہے تو کہیں اور سے ایک اور سرخ فوارہ ابل پڑتا ہے۔ پڑھیے وسعت اللہ کا ہفتہ وار کالم بات سے بات۔	real
1395	پاکستان میں شاہراہِ قراقرم کے متعدد مقامات پر لینڈ سلائیڈنگ اور پتھر گرنے سے سیاح پھنس گئے ہیں۔ چلاس سے گلگت تک لینڈ سلائیڈنگ سے سڑکیں بند ہیں جبکہ حکام کی جانب سے امدادی کارروائیاں جاری ہیں۔	real
1396	عمران خان کو ان کے پرانے وعدے یاد کرانا ایک قومی مشغلہ بن چکا ہے لیکن وہ بھی اُس ریاست کے سخت مخالف تھے جہاں انسانوں کو اغوا کر کے گمشدہ کر دیا جاتا ہے۔ آپ کے گھر کے دروازے پر ڈاکٹر دین محمد کی دو بیٹیاں بیٹھی ہیں جو ہر آنے جانے والے سے پوچھتی ہیں کہ ہمارے باپ نے کوئی جرم کیا ہے تو عدالت میں پیش کرو۔ محمد حنیف کا کالم۔	real
1397	جو بھی ہے اتنا معلوم ہے کہ اب مطالعہ پاکستان میں جغرافیہ اور شہریت کے باب بڑھانے اور تاریخ کے ابواب کم کرنے کا وقت آ گیا ہے۔ پڑھیے آمنہ مفتی کا کالم۔	real
1398	پاکستان کے صوبہ سندھ کی حکومت نے اعلان کیا ہے کہ رواں مون سون کے دوران شدید بارشوں کے نتیجے میں جانی و مالی نقصان کے باعث 20 اضلاع کو آفت زدہ قرار دے دیا گیا ہے۔ کراچی سمیت سندھ کے کچھ حصوں میں طوفانی بارشوں کے بعد گذشتہ دو روز سے بجلی اور موبائل سروس بند ہے جبکہ صوبے میں مزید بارشوں کی پیشگوئی کی گئی ہے۔	real
1399	دنیا بھر میں 30 اگست کو گمشدہ افراد کے لیے عالمی دن منایا جاتا ہے۔ اس حوالے سے پاکستان میں چند ایسے افراد کی کہانیاں جنھیں ریاستی اداروں کی جانب سے حراست میں لے لیا گیا اور تشدد کا نشانہ بنایا گیا۔ تاہم کچھ عرصہ صعوبت میں رکھنے کے بعد ان افراد کو رہا بھی کر دیا گیا۔	real
1400	ہر مہینے دو مہینے بعد فون آتا ہے۔ کِسی دوست کے دوست کا۔ کِسی جاننے والے کے جاننے والے کا۔ فلاں فلاں کو اُٹھا لیا ہے۔ آپ تو جانتے ہیں اُس نے کبھی کوئی ایسا ویسا کام نہیں کیا، آپ کچھ مدد کر سکتے ہیں کِسی سے بات کر سکتے ہیں، کچھ مشورہ ہی دے دیں۔	real
1401	کراچی میں طوفانی بارشوں سے ہونے والے نقصان کے بعد امدادی سرگرمیاں جاری ہیں جن میں سول انتظامیہ کے ساتھ فوج بھی شریک ہے۔ شہر کے سب سے زیادہ متاثرہ علاقوں میں سرجانی، یوسف گوٹھ، اورنگی ٹاون اور قائد آباد شاہ لطیف ٹاون شامل ہیں۔	real
1402	تعلیمی اداروں میں کورونا وائرس سے بچاؤ یا اس کو پھیلنے سے روکنا مشکل ہو سکتا ہے جب بڑی تعداد میں سکولوں میں پانی ہی دستیاب نہ ہو اور متعدد ایسے سکول بھی ہوں جہاں بیت الخلا ہی نہ ہو۔	real
1403	پاکستان کے وزیرِ اعظم عمران خان نے سیاحت کے حوالے سے حکومتی ترجیحات کو عملی جامہ پہنانے کے لیے ایک اعلیٰ سطحی نیشنل کوارڈینیشن کمیٹی برائے سیاحت تشکیل دی ہے۔ اس کمیٹی کی تشکیل کی ضرورت کیوں پیش آئی، یہ کیا عملی اقدامات کرے گی، اور پاکستان میں سیاحت کی صنعت سے وابستہ افراد کی اس کمیٹی کے بارے میں کیا رائے ہے، پڑھیے اس رپورٹ میں۔	real
1404	بی بی سی کو دیے گئے ایک خصوصی انٹرویو میں علی نواز چوہان نے این سی ایچ آر کے مبینہ غیر فعال ہونے سے لے کر مبینہ جبری گمشدگیوں اور اوکاڑہ کے مزارعین کی جانب سے ریاستی اداروں پر لگائے جانے والے الزامات پر بات کی ہے۔	real
1405	انڈیا میں میڈیا نے اسرائیل سے مزید دو ’آواکس‘ خریدنے کی منظوری دیے جانے سے متعلق خبر دیتے ہوئے کہا کہ یہ فیصلہ چین کی ساتھ سرحد پر کشیدگی کے پیشِ نظر بھی کیا جا رہا ہے۔	real
1406	بابراعظم سے بڑی اننگز نہ کھیلی جائے، یہ بہت کم ہی دیکھنے میں آتا ہے اور جب وہ بڑی اننگز نہ کھیل پائیں تو خود ان سے زیادہ افسوس اور کسے ہوتا ہوگا۔	real
1407	پاکستان کے سب سے بڑے شہر کراچی میں طوفانی بارش کا سلسلہ جاری ہے اور اس کے نتیجے میں صرف جمعرات کو دیواریں اور چھتیں گرنے، پانی میں ڈوبنے اور کرنٹ لگنے کے مختلف واقعات میں کم از کم 23 افراد کی ہلاکت کی تصدیق کی گئی ہے۔	real
1408	بارش میں پھنسے کراچی کے شہریوں کی مدد کرتے ہوئے سوشل میڈیا صارفین میں سے کوئی شہر میں ایمرجنسی سروس کے نمبرز فراہم کر رہے ہیں تو کوئی شہر کی سڑکوں پر پانی میں پھنسے شہریوں کو عارضی راحت کے لیے اپنے گھر آنے کی دعوت دے رہے ہیں۔	real
1409	کراچی اور ملک کے دوسرے حصوں میں ہنگامی صورتحال میں کسی نقصان سے بچنے کے لیے شہری اپنا اور اپنے عزیزوں کا تحفظ کس طرح کرسکتے ہیں۔	real
1410	لندن کی میٹروپولیٹن پولیس تین بھائیوں کے اغوا کے بعد ان کے والد عمران صافی کو تلاش کر رہی ہے اور محکمۂ پولیس نے عوام سے بھی ان بچوں کے بارے میں اطلاع فراہم کرنے کی اپیل کی ہے۔	real
1411	وفاقی دارالحکومت اسلام آباد کے چڑیا گھر میں جانوروں کی ہلاکت سے متعلق از خود نوٹس کی سماعت کے دوران اسلام آباد ہائی کورٹ کے چیف جسٹس اطہر من اللہ نے ریمارکس دیے ہیں کہ جس طرح چڑیا گھر میں غفلت ہوئی ہے اس سے لگتا ہے کہ پوری ریاست ایسے ہی چلائی جا رہی ہے۔	real
1412	بلوچستان میں معدومی کے خطرے سے دوچار مارخور کے تحفظ کی کئی کامیاب کہانیاں سامنے آئی ہیں جن میں سے ایک کوہ چلتن میں چلتن مارخور کے تحفظ کی ہے۔ یہاں اب مارخور کی آبادی 2014 سے دگنی ہو چکی ہے۔	real
1413	اب تک دستیاب معلومات کے مطابق لوئر چترال میں سیلابی ریلے کا سبب گولن گول، مروئے گول اور برنس گول کے تین بڑے نالے اور کچھ چھوٹے نالے تھے جہاں پر رات آٹھ بجے شروع ہونے والے موسلا دھار بارش کے بعد پانی نے سیلابی ریلوں کی شکل اختیار کرلی تھی۔	real
1414	پاکستان کی سپریم کورٹ نے حق مہر سے متعلق ایک درخواست پر فیصلہ سناتے ہوئے کہا ہے کہ دوسری شادی سے قبل پہلی بیوی یا ثالثی کونسل کی اجازت لینا ضروری ہے تاکہ معاشرے میں توازن قائم رکھا جا سکے۔	real
1415	کراچی میں ہونے والی بارش نے نا صرف شہر میں تباہی مچائی ہے بلکہ سوشل میڈیا پر بھی شہر کی حالت زار سے متعلق بحث چھیڑ دی ہے۔ لوگوں نے اپنے اپنے علاقے کی تصاویر اور ویڈیوز شیئر کرتے ہوئے غم و غصہ کا اظہار کیا۔	real
1416	اپنوں اور غیروں کی جانب سے بچھائے گئے جال میں پھنس کر گرفتار ہونے والے چاکر نوتک کلمتی پر انگریز فوج کے ایک کپتان کے قتل اور ان کی اہلیہ کے اغوا کا الزام تھا۔ چاکر کی آخری خواہش یہ تھی کہ انھیں کسی پہاڑی کی چوٹی پر پھانسی لگایا جائے تاکہ مرتے وقت اُن کی دھرتی کے مناظر اُن کے سامنے ہوں۔	real
1417	شرح سود اور اور ڈالر کی قیمت میں اضافے کے ساتھ کورونا وائرس اور پورے ملک میں لاک ڈاؤن کی وجہ سے ملکی معیشت کو پہنچنے والے نقصان، ٹیکسوں کی وصولی میں کمی اور حکومت کی جانب سے مختلف شعبوں کے لیے دیے گئے امدادی اور مراعاتی پیکیج کو بھی خسارے کی وجہ قرار دیا جس نے قرضوں میں اضافہ کیا۔	real
1418	وفاقی کابینہ نے سابق وزیراعظم نواز شریف کو وطن واپس لانے کے لیے تمام اقدامات کرنے کی منظوری دیتے ہوئے کہا ہے کہ مسلم لیگ (ن) کے قائد رعایت کے ناجائز استعمال کے مرتکب ہوئے ہیں۔	real
1419	پاکستان کے سب سے بڑے شہر کراچی میں منگل کو ہونے والی طوفانی بارش کے بعد شہر کے متعدد علاقوں میں کئی کئی فٹ پانی کھڑا ہے جبکہ وزیر اعلیٰ سندھ سید مراد علی شاہ نے صوبے میں شدید بارشوں کے بعد ’رین ایمرجنسی‘ نافذ کردی ہے۔	real
1420	24 اگست 1930 کو برطانوی اہلکاروں کی جانب سے بنوں میں مظاہرین پر فائرنگ کی گئی اور مقامی رہنما قاضی فضل قادر کو زخمی حالت میں گرفتار کیا تھا تاہم ان کی موت کے بعد ان کی لاش ورثا کے حوالے نہیں کی گئی۔	real
1421	گذشتہ روز پاکستان تحریکِ انصاف سے تعلق رکھنے والے وفاقی وزیر برائے ہوابازی غلام سرور خان کے ایک نفرت انگیز بیان کے باعث ان ہی پر تنقید کی جا رہی ہے اور پاکستانی سیاست میں بڑھتے انتہاپسند بیانیے پر بحث ہو رہی ہے۔	real
1422	حال ہی میں گوئبلز کے نظریات اور ’فرمودات‘ پڑھنے کا اتفاق ہوا۔ اس قدر دلچسپ فرمودات کہ یوں سمجھیے جیسے ٹیلی وژن سکرین پر روشن کئی چہروں سے تعارف ہو رہا ہو۔ ایسے کہ گوئبل کہیں جرمنی میں نہیں یہیں بہت ہی قریب لاہور، فیصل آباد یا اسلام آباد میں ہی بات کر رہا ہو: پڑھیے عاصمہ شیرازی کا کالم۔	real
1423	پاکستان پر پہلے دن سے طالبان کی حمایت کا الزام لگتا رہا ہے، تو سوال یہ پیدا ہوتا ہے کہ طالبان نے کورونا وبا کے بعد اپنے دوروں کا آغاز آخر پاکستان سے ہی کیوں کیا۔	real
1424	پاکستان کے صوبہ پنجاب میں حکومت نے سمارٹ لاک ڈاؤن کی حکمتِ عملی کے تحت اب جس گھر میں کورونا کا مریض سامنے آئے گا صرف اسی کو 14 روز کے لیے بند کیا جائے گا۔	real
1425	دیکھنا یہ ہوتا ہے کہ کیا معیشت میں نمو ہو رہی ہے یعنی اقتصادی ترقی میں اضافہ ہو رہا ہے؟ اگر ملک میں اقتصادی ترقی نہیں ہو گی تو درآمدات کم ہوجائیں گی اور کرنٹ اکاؤنٹ بیلنس سرپلس ہو جائے گا۔ یہ مثبت اشارہ نہیں ہو گا اور اس وقت اس بات پر اتفاق رائے ہے کہ پاکستان میں قومی اقتصادی ترقی کی شرح نمو دو فیصد سے کم ہے۔	real
1426	مسلم لیگ ن کے رہنماؤں نے وائٹ پیپر میں تحریک انصاف کی خارجہ پالیسی کو آڑے ہاتھوں لیا ہے۔ سابق وزیر خارجہ خواجہ محمد آصف کے مطابق حکومت کی سب سے بڑی ناکامی کشمیر ہے۔ شہباز شریف نے اعلان کیا ہے کہ وہ مولانا فضل الرحمان اور بلاول بھٹو سے بھی رابطہ کریں گے اور مشاورت کے ساتھ اب آل پارٹیز کانفرنس کی تاریخ کا تعین کریں گے۔	real
1427	احتساب اور داخلہ امور سے متعلق وزیر اعظم کے مشیر شہزاد اکبر کو کام سے روکنے اور ان کی تعیناتی کو کالعدم قرار دینے کے لیے ایک درخواست اسلام آباد ہائی کورٹ میں دائر کی گئی ہے۔	real
1428	پیر کے روز پاکستان میں سرکاری ذرائع ابلاغ پی ٹی وی اور ریڈیو پاکستان ہوں یا حکمران جماعت کے رہنماؤں کے سوشل میڈیا اکاؤنٹ۔۔۔ جہاں نظر دوڑائیں ’دی مسلم 500‘ کے 11ویں شمارے میں وزیرِ اعظم عمران خان کو بہترین شخصیت کا خطاب دیے جانے پر جشن کا سماں ہے۔	real
1429	پاکستان کے وزیر خارجہ شاہ محمود قریشی کے مطابق چین نے کہا کہ وہ مسئلہ کشمیر کا حل اقوامِ متحدہ کی قراردادوں اور دوطرفہ معاہدوں کی روشنی میں چاہتا ہے، جو کہ ان کے مطابق نہایت اہمیت کا حامل بیان ہے جبکہ ان کے مطابق سعودی عرب کا مؤقف او آئی سی سے مختلف نہیں۔	real
1430	پاکستان میں عموماً خواتین کے تولیدی صحت کے مسائل پر کُھل کر بات نہیں کی جاتی اور جسمانی طور پر معذور خواتین کو اس حوالے سے درپیش مسائل تو بالکل ہی زیر بحث نہیں آتے۔	real
1431	صوبائی دارالحکومت پشاور کے کچھ علاقوں میں مائیکرو سمارٹ لاک ڈاؤن کے بعد اب کاغان ڈیویلپمنٹ اتھارٹی نے ڈپٹی کمشنر مانسہرہ سے ان تفریحی مقامات پر سمارٹ لاک ڈاؤن کے نفاذ کی سفارش کی ہے جہاں کورونا وائرس کے نئے متاثرین کی تصدیق ہوئی ہے۔	real
1432	گذشتہ روز وزیر اعظم کے مشیر برائے احتساب شہزاد اکبر کی طرف سے ایک دلچسپ بیان سامنے آیا جب ایک صحافی نے ان سے پوچھا کہ ’نواز شریف کو این آر او‘ کس نے دیا؟‘ جواب میں انھوں نے محکمہ زراعت کا ذکر کیا لیکن بعد میں معافی مانگ لی۔	real
1433	اس برس کے بھیگنے،ڈوبنے اور ابھرنے کے بس چند ہی دن رہ گئے ہیں پھر جم کے سوکھا پڑے گا اور سب پہلے جیسا ہو جائے گا۔ کسی کو یاد بھی نہ رہے گا کہ کتنا برسا تھا اور کہاں کہاں برسا تھا؟ پڑھیے آمنہ مفتی کا ہفتہ وار کالم اڑیں گے پرزے۔	real
1434	وزیر اعظم کے مشیر برائے داخلہ امور شہزاد اکبر نے پریس کانفرنس میں بتایا کہ نواز شریف کی ضمانت میں توسیع کی درخواست مسترد ہونے کے بعد حکومت نے نیب کے ذریعے ان کی برطانیہ سے پاکستان کو حوالگی سے متعلق لازمی قانونی کارروائی کا آغاز کر دیا ہے۔	real
1435	پاکستان کے زیر انتظام کشمیر کے ضلع میرپور کی پولیس کے مطابق ڈھوڈیال میں پاکستانی پرچم اتارنے پر دو افراد کو گرفتار کرلیا گیا ہے۔	real
1436	بی بی شاری کا کہنا تھا کہ جب سکیورٹی فورسز کے افسر کو سزا ہوئی تو انھیں یہ یقین ہو گیا تھا کہ اب ان کا بیٹا گھر آ جائے گا اور وہ عمر کا بقیہ حصہ بیٹے کی گمشدگی کے غم کے بغیر گزاریں گی مگر ایسا نہ ہو سکا۔	real
1437	توہین رسالت کے ملزم طاہر احمد نسیم پر عدالت میں فائرنگ کر کے ہلاک کرنے والے ملزم کی عمر کے بارے میں کہا جا رہا ہے کہ وہ کم عمر ہیں یعنی ان کی عمر 18 سال سے کم ہے۔	real
1438	کیا الطاف حسین اور ایم کیو ایم کو عروج بھی اُسی اسٹیبلشمنٹ نے عطا کیا تھا جس پر لعن طعن نے انھیں اس حالیہ زوال سے دوچار کر رکھا ہے، یا پھر اس عروج و زوال میں کوئی حصہ شخصیت پرستی، ذاتی انا اور آمرانہ طرزِ سیاست کا بھی ہے جس کے سحر سے ایم کیو ایم اور الطاف حسین دونوں ہی کبھی آزاد دکھائی نہیں دیے؟	real
1439	پاکستان اور چین نے سی پیک منصوبوں کی تعیمرات کو آگے بڑھانے پر اتفاق کرتے ہوئے کہا ہے کہ زیر تعمیر منصوبوں کی جلد تکمیل کو یقینی بنایا جائے گا۔ ان منصوبوں کا مقصد معاشی اور سماجی ترقی ہو گا۔ ان کے ذریعے نئی ملازمتوں کے مواقع اور عام آدمی کی زندگی میں بہتری لانے کی کوشش کی جائے گی۔	real
1440	راولپنڈی کی ایک مقامی عدالت کے جج کے مطابق ملزمہ کے خلاف شراب برآمدگی کے حوالے سے کوئی شواہد نہیں ملے اس لیے عدم ثبوت کی بنا پر اُنھیں اس مقدمے سے بری کیا جاتا ہے۔	real
1441	23 کروڑ میں سے تقریباً 6000 افراد کی ہلاکت کے بعد یہ کہا جا سکتا ہے کہ بظاہر پاکستان اس سلسلے میں کئی مغربی ممالک سے بہتر رہا ہے۔ مثال کے طور پر برطانیہ میں 6 کروڑ 70 لاکھ افراد میں 41000 سے زیادہ ہلاکتیں ہوئی ہیں۔	real
1442	ایم ایل ون کی پٹڑیاں جن سو سالہ پرانی بنیادوں پر بچھی ہیں وہ اس سے زیادہ رفتار اور وزن دونوں برداشت نہیں کر سکتیں۔ یہی وجہ ہے کہ ریلوے مسلسل نقصان کا سامنا کر رہا ہے تاہم اگر ایم ایل ون کی صلاحیت کو بڑھا دیا جائے تو یہ نا صرف ریلوے بلکہ پاکستان کی تقدیر کو آنے والے وقت میں یکسر بدل کر رکھ سکتی ہے۔	real
1443	پاکستان کے سب سے بڑے شہر کراچی میں ایک نیا ضلع بنانے کی منظوری دی گئی ہے۔ کیماڑی ضلعے کے قیام سے کراچی شہر میں اضلاع کی تعداد سات ہو جائے گی۔	real
1444	طبعاً ملنگ تھے اور فائیو سٹار ہوٹل سے لے کر فٹ پاتھ تک بیٹھنے میں کبھی کوئی عار نہ تھا۔ یہی وجہ ہے کہ انھوں نے زندگی بھر صرف ایک اثاثہ بنایا یعنی ان کے دوست نظریاتی حدود سے ماورا ہر طبقے سے تھے: وسعت اللہ خان کی تحریر۔	real
1445	پاکستان کے صوبہ بلوچستان کے سینیئر سیاست دان اور نیشنل پارٹی کے مرکزی رہنما سینیٹر میر حاصل خان بزنجو انتقال کر گئے ہیں۔ وہ کینسر کے مرض میں مبتلا تھے۔	real
1446	وزیرِ اعظم پاکستان عمران خان نے جمعرات کو صوبہ خیبرپختونخواہ کے ہر خاندان کو صحت انصاف کارڈ کی فراہمی کے 18 ارب روپے کے پروگرام کا اجراء کر دیا ہے جس کے تحت ہر خاندان کو دس لاکھ روپے تک علاج کی مفت سہولت فراہم کی جائے گی۔	real
1447	سوال یہ ہے کہ سابق وزیر اعظم کی ضمانت میں توسیع کے بارے میں نہ تو اسلام آباد ہائی کورٹ میں درخواست آئی اور نہ ہی عدالت کی طرف سے کوئی نوٹس جاری کیا گیا تو ایسے میں حکومت اور خصوصاً نیب حکام کیا اقدامات کر رہے ہیں۔	real
1448	پنوعاقل میں ایک ہی خاندان کے 11 افراد کے قتل کی ایف آئی آر کے مطابق ملزمان نے چاقو سے گلے کاٹ کر علاقے میں خوف و ہراس پھیلایا۔ پولیس کے مطابق مقتولین کے ہاتھ اور پاؤں پکڑ کر ان کے گلے کاٹے گئے۔	real
1449	موجودہ مالی سال کے پہلے مہینے جولائی میں بیرون ملک مقیم پاکستانیوں کی جانب سے ملک میں بھجوائی جانے والی رقوم کسی ایک ماہ میں بلند ترین سطح پر پہنچ گئیں۔	real
1450	پاکستان کے صوبہ بلوچستان میں پولیس کا کہنا ہے کہ تربت میں نوجوان طالبعلم حیات بلوچ کو قتل کرنے والے نیم فوجی دستے فرنٹیئر کور کے اہلکار نے مجسٹریٹ کے سامنے اپنے جرم کا اعتراف کر لیا ہے۔	real
1451	عامر خان ترکی گئے اور اس سے انڈیا میں بہت سے لوگ ناراض ہیں۔ صدر اردوغان کے دور میں بھی انڈیا اور ترکی کے تعلقات بہتر بنانے کی کوششیں کی گئیں لیکن ترکی اور انڈیا کے درمیان تعلقات سمجھنے کے لیے ماضی کے واقعات کا ذکر ضروری ہے۔	real
1452	سابق چیف سیکریٹری خیبر پختونخوا اور وزیرِ اعظم کے موجودہ پرنسپل سیکریٹری اعظم خان کے بارے میں عام تاثر یہی ہے کہ وہ اپنے کام میں مداخلت پسند نہیں کرتے۔	real
1453	پاکستان اور سعودی عرب کے درمیان تناؤ کی بظاہر سب سے بڑی وجہ کشمیر پر ریاض کی جانب سے اسلام آباد کے مؤقف کی کھل کر حمایت نہ کرنا ہے تاہم کئی تجزیہ نگار سمجھتے ہیں کہ یہ معاملہ صرف کشمیر تک محدود نہیں۔	real
1454	تربت میں فرنٹیئر کور کے اہلکاروں کی فائرنگ سے ہلاک ہونے والے طالب علم حیات بلوچ کے والد نے شناخت پریڈ میں ایف سی اہلکار کو شناخت کر لیا ہے۔	real
1455	پاکستان کے وزیراعظم عمران خان نے نجی ٹی وی چینل کو انٹرویو دیتے ہوئے واضح کیا ہے کہ سعودی عرب کے ساتھ خراب تعلقات کی خبریں غلط ہیں اور یہ کہ پاکستان کی ترقی اور مستقبل چین کے ساتھ منسلک ہے۔	real
1456	صوبہ پنجاب سے تعلق رکھنے والی 27 سالہ مہک کو اپنے چہرے پر پہلی مرتبہ سفید نشان 12 سال کی عمر میں نظر آیا اور جلد ہی انھیں معلوم ہو گیا کہ وہ برص کا شکار ہیں، تاہم اسے اپنی کمزوری سمجھنے کے بجائے انھوں نے اپنی اور اپنے جیسے دیگر افراد کی نمائندگی کا فیصلہ کیا۔ ان کی کہانی ان ہی کی زبانی سنیے۔	real
1457	یقیناً چند صحافیوں نے کوڑے کھائے لیکن کتنے صحافیوں نے تلوے چاٹے؟ سیاستدان پھانسی پر جھومے، شاہی قلعے کے عقوبت خانوں میں رہے لیکن ان سے کتنے زیادہ تھے جو سیاسی کارکنوں کی لاشوں کو روندتے ہوئے اقتدار کے ایوانوں تک پہنچے: پڑھیے محمد حنیف کا کالم۔	real
1458	پاکستان میں صوبہ خیبر پختونخوا اور صوبہ بلوچستان کے علاقے ایسے ہیں جہاں سرد موسم کے باعث تعلیمی اداروں میں چھٹیاں دسمبر سے فروری تک ہوتی ہیں اور تعلیمی سال عام طور پر مارچ میں شروع ہو جاتا ہے اور دسمبر میں ان علاقوں میں سالانہ امتحان ہو جاتے ہیں۔	real
1459	سنہ 2018 میں پاکستان تحریک انصاف کی انتخابات میں کامیابی کے عمران خان نے وزیراعظم کے عہدے کا حلف اٹھایا تھا اور منگل کو ٹوئٹر پر صارفین دو سالہ کارکردگی پر اپنے خیالات کا اظہار کرتے نظر آئے۔	real
1460	امریکی کی معروف اور سائنس اور ٹیکنالوجی کی دنیا میں سب سے بڑی تعلیمی درسگاہ کہلائی جانے والی ایم آئی ٹی کے شعبہ سائنس کی نئی ڈین پاکستانی نژاد سائنسدان نرگس ماولوالا کو بنایا گیا ہے۔	real
1461	پاکستان تحریکِ انصاف کی حکومت گذشتہ دو برسوں میں کن شعبوں میں کس حد تک کامیاب یا ناکام ہوئی یہ جاننے کے لیے بی بی سی نے حکومتی امور پر نظر رکھنے والے چند ماہرین سے بات کی ہے۔	real
1462	سعودی عرب اب بھی پاکستان سے اچھے تعلقات برقرار رکھنا چاہے گا لیکن وہ پاکستان کی طرح انڈیا کو اپنا دشمن ملک نہیں سمجھتا ہے اور سعودی عرب انڈیا سے اپنی دوستی کو پاکستان کی پالیسی کا یرغمال نہیں رکھنا چاہے گا۔	real
1463	سارنگ جویو کو جب رات کو ساتھ چلنے کو کہا گیا تو ان کا خیال تھا کہ انھیں گولی مارکر لاش پھینک دی جائے گی لیکن اس خدشے کے برعکس انھیں زندہ رہا کر دیا گیا۔	real
1464	حکومت پاکستان کی جانب سے دو چینی کمپنیوں کی جانب سے تیار کی جانے والی کورونا وائرس کی ویکسین کی انسانوں پر آزمائش کی منظوری دے دی گئی ہے۔ نیشنل انسٹیٹوٹ آف ہیلتھ کے مطابق یہ کسی بھی ویکیسن کا پاکستان میں پہلا کلینیکل ٹرائل ہوگا اوراس میں چینی کمپنیاں کین سینو بائولوجکس اور بیجنگ انسٹیٹیوٹ آف بائیو ٹیکنالوجی شامل ہوں گی۔	real
1465	انڈیا اور امریکہ کی بڑھتی قربت کے بیچ چین اور انڈیا کا سرحدی تنازعہ، عرب امارات اور اسرائیل کے مابین جگری یاری، سعودی عرب اور پاکستان کے مابین ہلکی پھلکی موسیقی انہی تبدیلیوں کا شاخسانہ ہے: پڑھیے عاصمہ شیرازی کا کالم	real
1466	ایسے بیانات کے لیے صرف وزیرِ ماحولیات ہی مشہور نہیں بلکہ پاکستان تحریکِ انصاف کے دیگر اراکین بھی وقتاً فوقتاً ایسے اقوال فرماتے رہتے ہیں جنھیں سن کر ایک عام انسان سر پکڑ کر بیٹھ جاتا ہے۔	real
1467	ادارے کی جانب سے جاری کردہ پریس ریلیز کے مطابق جون 2020 سیریز کے نتائج طلبا کے سکولوں کی جانب سے بھیجے گئے نتائج سے کم نہیں ہوں گے۔	real
1468	میڈیا رپورٹس کے مطابق پاکستان کے آرمی چیف قمر جاوید باجوہ سعودی عرب اور پاکستان کے درمیان ’کشیدگی‘ کم کرنے کے لیے ریاض پہنچ گئے ہیں۔ حال ہی میں پاکستانی وزیر خارجہ شاہ محمود قریشی کے ایک بیان کے بعد پاکستان اور سعودی عرب کے تعلقات میں کیشدگی کے بارے میں خبریں شائع ہوئی تھیں۔	real
1469	کالعدم تنظیم تحریک طالبان پاکستان اندرونی اختلافات کی وجہ سے دھڑے بندی کا شکار ہو گئی تھی لیکن اب ایک مرتبہ پھر یہ تنظیم یکجا ہونے جا رہی ہے اور پیر کو باقاعدہ طور پر جماعت الاحرار اور حزب الاحرار نے تحریک میں ضم ہونے کا اعلان کر دیا ہے۔	real
1470	11 اگست کو کراچی کے علاقے اختر کالونی میں اپنے گھر سے لاپتہ ہونے والے سارنگ جویو گذشتہ رات واپس اپنے گھر پہنچ گئے ہیں۔ ان کے والد ان کا معاملہ سینیٹ میں انسانی حقوق کی کمیٹی کے اجلاس میں اٹھائیں گے۔	real
1471	سوشل میڈیا پر گردش کرتی ویڈیو میں دیکھا جاسکتا ہے کہ بارش میں اسلام آباد انٹرنیشنل ایئر پورٹ کی چھت اور دیواریں ٹوٹ پھوٹ کا شکار ہو رہی ہیں۔ سی اے اے نے واقعے کا نوٹس لے لیا ہے۔	real
1472	کراچی کے وسط میں ایک 43 ایکڑ کا سرسبز جزیرہ واقع ہے، جسے لوگ چڑیا گھر یا گاندھی گارڈن کے نام سے جانتے ہیں لیکن دراصل یہ جگہ ایک نباتاتی باغ ہے اور یہاں کے دو ہزار سے زائد قد آور درخت کراچی کے لیے کسی آکسیجن کے کارخانے سے کم نہیں ہیں۔	real
1473	ہم صحافی، سیاستداں، شاعر، منصف اور دانشور تو آج بھی اپنا قلم و دہن انسانیت کے لیے دان کرنے کو تیار ہیں مگر مرنے والے یا غائب ہونے والے بھی تو ہمارا کچھ خیال کریں۔ پڑھیے وسعت اللہ خان کا تازہ کالم۔	real
1474	ہمارے وفاقی اور صوبائی وزرائے تعلیم بیانات کی حد تک تو مذمت کر رہے ہیں لیکن دو لاکھ سے زائد طلبہ کے مستقبل اور والدین کی جیب پر اس بھار کا سچ مچ بھی کچھ مداوا کیا جائے گا یا کیمبرج کے ان طلبہ کے ساتھ ہمیشہ کی طرح سوتیلے بچے کا سا برتاو کیا جائے گا؟ آمنہ مفتی کا کالم۔	real
1475	تاج جویو کو صدارتی تمغہ برائے حسنِ کارکردگی سے نوازے جانے کا اعلان کیا گیا تھا تاہم انھوں نے بعض اعتراضات کی بنا پر یہ ایوارڈ لینے سے انکار کر دیا ہے۔	real
1476	کشمیریوں کو 70 سال میں پہلی مرتبہ ایسا محسوس ہو رہا ہے کہ پاکستان اپنے مسائل میں اس قدر اُلجھا ہوا ہے کہ وہ انڈیا کو نہ کشمیریوں کو رعایت دینے پر مجبور کر سکتا ہے اور نہ ہی مذاکراتی میز پر لا سکتا ہے۔	real
1477	صوبہ بلوچستان کے ضلع تربت میں پولیس نے طالب علم حیات بلوچ کو مبینہ طور پر ہلاک کرنے کے الزام میں فرنٹیئر کور کے اہلکار کو گرفتار کر کے تفتیش کے لیے سات روزہ ریمانڈ حاصل کر لیا ہے۔	real
1478	لاہور کی تاریخی مسجد وزیر خان میں ایک گانے کی شوٹنگ کرنے پر اداکارہ صبا قمر اور گلوکار بلال سعید کے خلاف مقدمہ درج کر لیا گیا ہے۔	real
1479	بلوچستان کے مختلف علاقوں میں گذشتہ چار پانچ روز کے دوران بم حملوں کے واقعات پیش آئے ہیں۔ ان حملوں میں پاکستان کے یومِ آزادی کی مناسبت سے پرچم وغیرہ فروخت کرنے والے سٹالز اور دکانوں کو نشانہ بنایا گیا۔	real
1480	اسرائیل اور متحدہ عرب امارات کے درمیان امن معاہدے کی خبر آنے کے بعد سے دنیا بھر میں ہر طرف اس بارے میں بات ہو رہی ہے۔ کہیں لوگ اسے امن کی طرف ایک مثبت قدم کہہ رہے ہیں تو کہیں لوگ متحدہ عرب امارات سے نالاں ہیں کہ انہوں نے اپنا ’ضمیر بیچ ڈالا‘ ہے۔	real
1481	پاکستان کے صوبہ سندھ میں دو تاریخی مذہبی عمارتوں کی بحالی کے دوران محکمہ آثار قدیمہ کی جانب سے ’وائٹ واش‘ کیا گیا ہے، جس کو ماہرین ان کا تشخص مٹانے کے مترادف قرار دے رہے ہیں۔	real
1482	سارے متفقہ طورپر چاہتے تھے کہ عمران فاروق قتل کیس کی ایف آئی آر میں الطاف حسین کو براہ راست نامزد کیا جائے تاکہ وہ ایسی گرفت میں آئیں کہ نکل نہ سکیں مگر ایک پولیس افسر نے الطاف حسین کا نام ایف آئی آر میں براہ راست لکھنے کی بجائے بالواسطہ لکھنے کا کہہ کر نیا مسئلہ کھڑا کر دیا تھا۔	real
1483	پاکستان اپنی یوم آزادی کی تقریبات ہر سال 14 اگست کو اور ساتھ ہی آزاد ہونے والا ہمسایہ ملک انڈیا اپنی یہی تقریبات 15 اگست کو مناتا ہے اور ہر سال یہ سوال اٹھتا ہے کہ دو ملک جو ایک ساتھ آزاد ہوئے ہوں، ان کے یوم آزادی میں ایک دن کا فرق کیسے آ گیا؟	real
1484	جماعت احمدیہ پاکستان کے ترجمان سلیم الدین کے مطابق معراج احمد گزشتہ کچھ عرصے سے مشکلات کا شکار تھے اور سوشل میڈیا پر ان کے خلاف مہم چلائی جا رہی تھی۔	real
1485	شیروں کے مالک زوہیب کو مشروط اجازت دی گئی ہے کہ وہ ڈیڑھ ماہ کے اندر ان شیروں اور چیتوں کو فروخت کر سکتے ہیں اور پاکستان کا کوئی بھی سرکاری یا نجی چڑیا گھر، ٹرسٹ، یا غیر سرکاری تنظیم انھیں خرید سکتے ہیں	real
1486	پشاور بی آر ٹی کی افتتاحی تقریب سے خطاب کرتے ہوئے وزیر اعظم عمران خان کا کہنا تھا کہ ابتدا میں انھیں اس منصوبے پر تحفظات تھے مگر سابق وزیر اعلی پرویز خٹک ہمیشہ اس کی اہمیت پر زور دیتے تھے۔	real
1487	عالمی تنظیم میٹیوریٹیکل سوسائٹی کی جانب سے جاری کیے جانے والے ڈیٹابیس کے مطابق 18 ویں صدی سے 2020 تک کُل 17 شہابِ ثاقب پاکستان کے مختلف علاقوں خصوصاً صوبۂ پنجاب اور سندھ میں گرے ہیں۔	real
1488	پاکستانی وزیر خارجہ شاہ محمود قریشی کی سعودی عرب پر تنقید کے بعد تجزیہ کاروں کا ماننا ہے کہ درحقیقت پاکستان اور سعودی عرب کے تعلقات میں حالیہ کشیدگی کی بڑی وجہ ایشیائی ممالک میں دنیا کی بڑی طاقتوں کا بدلتا توازن ہے۔	real
1489	گلگت بلتستان انتظامیہ کے مطابق سفر کا ارداہ رکھنے والے تمام سیاحوں کو خطے میں داخل ہونے کے لیے کورونا وائرس ٹیسٹ کی رپورٹ ہمراہ رکھنا لازمی ہے بصورتِ دیگر سیاحوں کو واپس بھج دیا جائے گا۔	real
1490	کیمبرج اسسمنٹ انٹرنیشنل ایجوکیشن نے دو روز قبل اے اور او لیول کے نتائج جاری کیے ہیں۔ ان نتائج میں امتحانات کے بغیر براہ راست گریڈنگ کی گئی ہے۔ مگر دیگر کئی ممالک کی طرح پاکستان میں بھی طلبہ نتائج پر سراپا احتجاج ہیں۔	real
1491	پاکستان کی بعض معروف خواتین صحافیوں نے سوشل میڈیا پر ٹرولنگ اور ہراسانی کے بارے میں ایک مشترکہ بیان میں کہا ہے کہ یہ معاملہ انتہائی سنگین شکل اختیار کر چکا ہے۔	real
1492	منگل کے روز لاہور میں مسلم لیگ ن کے کارکنوں اور پولیس کے درمیان تصادم اور اس کے بعد سیاسی سطح پر شروع ہونے والی الزام تراشیوں نے کورونا کی صورتحال کے باعث ملک کی سیاست پر طاری جمود کو توڑ کر اچانک ایک سیاسی ہنگامہ کھڑا کر دیا ہے۔	real
1493	پاکستان کی عدالت عظمی نے ملک کے سب سے بڑے شہر کراچی کے تمام نالوں کی صفائی نیشنل ڈیزاسٹر مینجمنٹ اتھارٹی کے حوالے کرنے کا حکم جاری کیا ہے اور حکومت سندھ کو ہدایت کی ہے کہ وہ اس کام کی نگرانی کرے۔	real
1494	سپریم کورٹ آف پاکستان کے چیف جسٹس پاکستان گلزار احمد نے کراچی میں لوڈشیڈنگ، کرنٹ لگنے سے لوگوں کی ہلاکتوں پر کے الیکٹرک پر سخت برہمی کا اظہار کرتے ہوئے ریمارکس دیے ہیں کہ شہر میں کرنٹ لگنے سے جتنی بھی ہلاکتیں ہوئی ہیں، سب کے مقدمے میں چیف ایگزیکٹیو آفیسر کے الیکٹرک کا نام شامل کیا جائے اور ان کا نام ای سی ایل میں بھی ڈالا جائے جبکہ کے الیکٹرک کو شہر میں صفر لوڈ شیڈنگ کرنے کا حکم دیا ہے۔	real
1495	پاکستان کے شہر لاہور میں واقع قومی احتساب بیورو (نیب) کے دفتر کے باہر منگل کو ہونے والی ہنگامہ آرائی کے بعد مسلم لیگ نواز کی رہنما مریم نواز شریف نے الزام لگایا ہے کہ ان کی گاڑی پر پتھراؤ کرنے والے پولیس کی وردی میں تھے جبکہ حکومت کا مؤقف ہے کہ لیگی کارکنوں کی جانب سے جعلی نمبر پلیٹ والی گاڑیوں میں پتھر لائے گئے۔	real
1496	زلفی بخاری نے دعویٰ کیا کہ ورلڈ ٹورازم فورم سے پانچ دنوں میں پاکستان میں 10 ارب ڈالر کی سرمایہ کاری آئے گی اور اس کے علاوہ اس فورم سے اشتہارات اور پروموشن کی مد میں بڑے نشریاتی ادراوں میں 400 ملین ڈالر مالیت کے ٹی وی رائٹس بھی ملیں گے۔	real
1497	جب ڈپٹی اٹارنی جنرل نے عدالت کو بتایا کہ سیکرٹری موسمیاتی تبدیلی خود اس معاملے کی انکوائری کر رہی ہیں تو چیف جسٹس اطہر من اللہ نے کہا 'وزارت موسمیاتی تبدیلی خود ذمہ دار ہے، سیکرٹری صاحبہ اپنے خلاف تحقیقات کیسے کریں گی؟‘	real
1498	وفاق ہو یا صوبے، خیبر پختونخواہ ہو یا پنجاب، ُبزدار صاحب اطاعت کی ایسی اعلیٰ مثال بن گئے ہیں جن کا ذکر آپ کو گورنر جنرل غلام محمد کی طرح صرف تاریخ کی کتابوں میں ہی ملے گا: پڑھیے عاصمہ شیرازی کا کالم	real
1499	بی بی سی کی ٹیم نے پاکستان میں سیاحتی مقام دوبارہ کھلنے کے بعد مری اور نتھیا گلی کے تفریحی مقامات پر تقریباً دس گھنٹے گزارے، لیکن اس دوران بمشکل درجن بھر افراد ایسے دکھائی دیے جنھوں نے ماسک پہن رکھے تھے یا سماجی دوری برقرار رکھنے کی کوشش کر رہے تھے۔	real
1500	کورونا وائرس کی وجہ سے لگاتار تین مہینے تک خسارے کا شکار رہنے کے بعد پاکستان کی برآمدات جولائی کے مہینے میں مجموعی طور پر 5.8 فیصد اضافے سے بڑھی ہیں جبکہ اسی دورانیے میں انڈیا اور بنگلہ دیش کی برآمدات میں کمی ہوئی ہے۔	real
1501	وزیر اعظم عمران خان نے اقتدار میں آنے سے قبل ہی پورے ملک میں یکساں نصاب تعلیم رائج کرنے کا وعدہ کیا تھا۔ یکساں نصاب تعلیم کیا ہے، اس کی ضرورت کیوں پیش آئی، نصاب کی تیاری کیسے کی گئی اور اس کا نفاذ کیسے ہو گا؟ پڑھیے اس تفصیلی رپورٹ میں۔	real
1502	وزیر اعلی پنجاب کی پریس کانفرنس سوشل میڈیا پر وائرل ہثئی اور اس پر ایک بحث جاری ہے۔ اُس پریش کانفرنس کا متنازع حصہ ٹوئٹر پر شیئر کیا جا رہا ہے جس میں وزیر اعلی پنجاب عثمان بزدار سے نیب کے بارے میں سوال کیا جاتا ہے اور اس سوال پر اُن کے ساتھ کھڑے وزیر اطلاعات فیاض الحسن چوہان آنکھ کھجاتے ہوئے اپنا منہ موڑتے ہوئے وزیر اعلی کے کان میں کہتے ہیں کہ نیب کے خلاف نہیں بولنا۔	real
1503	سپریم کورٹ کراچی رجسٹری میں چیف جسٹس گلزار احمد کی سربراہی میں تین رکنی بینچ نے کمشنر کراچی کو سائن بورڈ ہٹانے کا مکمل اختیار دے دیا اور ہدایت جاری کی کہ تمام سرکاری مقامات سے بل بورڈ اور سائن بورڈ ہٹائے جائیں اور نجی املاک پر نصب خطرناک سائن بورڈ بھی فوری ہٹائیں۔	real
1504	پاکستان کے صوبے بلوچستان سرحدی شہر چمن میں پیر کو ہونے والے ایک بم دھماکے کے نتیجے میں کم از کم پانچ افراد ہلاک اور 26 زخمی ہوئے ہیں۔	real
1505	قومی احتساب بیورو میں سیاستدانوں پر قائم کردہ درجنوں ایسے مقدمات اب بھی زیر التوا ہیں جن کا آغاز برسوں قبل کیا گیا تھا۔ دہائیوں قبل شروع ہونے والے بیشتر کیسز میں نا تو اب تک ریفرنس فائل ہو سکا اور اگر ہوا ہے تو فرد جرم عائد ہونا باقی ہے۔ ایسے ہی چند مقدمات کی کہانی جانیے۔	real
1506	پاکستان میں حکومتی نمائندوں کے منھ سے تو یہ بات آپ نے کئی بار سنی ہو گی کہ ’پاکستان میں کورونا وائرس کی وبا پر قابو پا لیا گیا ہے، لیکن اگر اس چیز کا اعتراف مائیکرو سافٹ کمپنی کے شریک بانی بل گیٹس کریں تو یہ یقیناً ایک بڑی کامیابی ہوگی۔	real
1507	وزیر اعظم عمران خان نے دس بلین درخت لگانے کی شجر کاری مہم کا آغاز کر دیا ہے۔ ان کے مطابق اتوار کو ملک بھر میں 35 لاکھ درخت لگائے گئے ہیں۔ سوشل میڈیا پر پودے اکھاڑنے والے ان افراد کی ویڈیو وائرل ہوئی تو جیسے ہر کوئی غصے میں آ گیا۔ معاملہ اتنا بڑھا کہ ذمہ داران کے خلاف ایف آر آئی بھی درج کی گئی۔	real
1508	یہ تو وہ قصہ ہے جو کھل گیا۔اب تک نہ جانے پارلیمنٹ اور اسمبلیاں ایسے کتنے قوانین منظور کر چکی ہیں جنھیں صرف مرتب کرنے یا کروانے والوں نے ہی پڑھا ہو گا۔ پڑھیے وسعت اللہ خان کا کالم بات سے بات۔	real
1509	اسلام آباد کی احتساب عدالت نے جعلی بینک اکاؤنٹس کے مقدمے میں نجی ہاؤسنگ سوسائٹی بحریہ ٹاؤن کے سربراہ ملک ریاض کے بیٹے زین ملک سے متعلق کہا ہے کہ ملزم کی عدم موجودگی میں کی گئی پلی بارگین کیسے تسلیم کر لی گئی اور عدالت کیسے یقین کرلے کہ پلی بارگین ملزم کی طرف سے ہی کی گئی ہے۔	real
1510	دو ’لڑکیوں کی مبینہ شادی سے متعلق کیس کی سماعت کے دوران جج نے ریمارکس دیتے ہوئے کہا کہ ’دینِ اسلام ہم جنسی پرستی کی اجازت نہیں دیتا۔۔۔ عدالت اسلامی اقدار کے باہر نہیں جا سکتی۔‘	real
1511	برصغیر کی جدوجہد آزادی کی تاریخ میں کاکوری ٹرین ڈکیتی کا واقعہ ایک اہم سنگ میل کی حیثیت رکھتا ہے۔ یہ تاریخی واقعہ 9 اگست 1925 کو پیش آیا تھا۔ جب کاکوری کے قریب سہارن پور سے لکھنو جانے والی ٹرین کو روک کر اس میں موجود سرکاری خزانہ لوٹ لیا گیا تھا۔	real
1512	مسٹر جناح کا دلی میں گھر جسے سیٹھ رام کرشن ڈالمیا نے تین لاکھ روپے میں خریدا ہے اب گائے کو ذبح کرنے کی مخالفت کرنے والی ایک تنظیم کا صدر دفتر ہو گا اور عمارت پر گائے کا پرچم لہرائے گا۔	real
1513	نیا نقشہ جو کہ دراصل پرانا ہی نقشہ ہے، سوائے سوشل میڈیا پہ ہنسی ٹھٹھول اور ’میم بازی‘ کے کسی کام نہ آیا۔ اخلاقی یا بین الاقوامی سطح پہ اگر نقشوں، دعووں اور بیانات کی کچھ اہمیت سمجھی جاتی تو آج دنیا اس حال میں نہ ہوتی۔	real
1514	فلمی سکرین پر امیتابھ بچن، سلمان خان یا انیل کپور کو ڈبل رول میں دیکھتے ہوئے یہ ذہن میں ہوتا ہے کہ یہ سب کیمرے کا کمال ہے لیکن کرکٹ کے میدان میں جڑواں بھائیوں کی پرفارمنس کسی کیمرہ تیکنیک کی مرہون منت نہیں بلکہ سو فیصد حقیقت پر مبنی ہوتی ہے۔	real
1515	پاکستان میں کورونا وائرس کے کیسز کم ہونے کے بعد بہت سے صنعتوں کو محدود پیمانے پر کھولنے کی اجازت دی جا رہی ہے جن میں سے ایک سیاحت کی صنعت ہے۔ محدود پیمانے پر سیاحت کی اجازت کیا ہے اور سیاحوں کو کن ضوابط پر عمل پیرا ہونا ہو گا پڑھیے اس رپورٹ میں۔	real
1516	وزیر اعظم عمران خان نے چار اگست کو پاکستان کے نئے سیاسی نقشے کی رونمائی کی ہے جس میں دیگر متنازع علاقوں کے علاوہ انڈیا کی ریاست جونا گڑھ کو پاکستان کا حصہ ظاہر کیا گیا ہے۔ ایسا کرنے سے پاکستان کو کیا حاصل ہو گا اور اس اقدام کی قانونی اور بین الاقوامی حیثیت کیا ہے؟	real
1517	وزیر خارجہ شاہ محمود قریشی کے مسئلہ کشمیر کے تناظر میں سعودی عرب سے متعلق دیے گئے ایک بیان کے بعد یہ بحث چھڑ گئی ہے کہ کیا پاکستان سعودی عرب کے ساتھ اپنے دیرینہ تعلقات پر نظر ثانی کر رہا ہے۔	real
1518	چین اور انڈیا کے درمیان سرحدی کشیدگی کے بیچ کچھ نظریں پاکستان پر بھی مرکوز ہیں۔ بی بی سی نے اس حوالے سے چند ماہرین سے بات کر کے یہ جاننے کی کوشش کی ہے کہ اس صورتحال میں پاکستان کا کردار کیا ہے۔	real
1519	میں جو بات اپنے دوست سے کہہ نہ سکا وہ یہ تھی کہ ہم 70 سال سے ’کشمیر بنے گا پاکستان‘ کا نعرہ لگا رہے تھے ہم پاکستان تو نہ بنا سکے کشمیر کو فلسطین ضرور بنا دیا گیا اور فلسطین کو فلسطین کیسے بنایا تھا وہاں تک ہماری اب یاداشت بھی نہیں جاتی: پڑھیے محمد حنیف کا کالم۔	real
1520	جب بابراعظم، اسد شفیق اور محمد رضوان ایک ایک کر کے آؤٹ ہوتے گئے تو اوپنر شان مسعود کو ایک قابل اعتماد ساتھی کی تلاش تھی۔ اس وقت شاداب خان ان کے ساتھ 105 رنز کی اہم شراکت قائم کرنے میں کامیاب ہوگئے۔ لیکن جب کچھ لوگوں نے سابق کپتان سرفراز کو گراؤنڈ میں پانے لاتے دیکھا تو انھیں لگا کہ یہ کام کسی جونیئر کھلاڑی سے کروانا چاہیے تھا۔	real
1521	پاکستان میں کورونا وائرس کے پھیلاؤ میں مسلسل کمی کے پیش نظر پاکستان میں مختلف نوعیت کی عائد پابندیوں کو ہٹانے کا فیصلہ کیا گیا ہے جبکہ دوسری جانب پڑوسی ملک انڈیا مریضوں کی کُل تعداد کے حوالے سے دنیا کا تیسرا سب سے متاثرہ ملک بن گیا ہے۔	real
1522	پاکستان کے چیف جسٹس گلزار احمد نے صحافی مطیع اللہ جان کے مبینہ اغوا کے متعلق درج مقدمے میں اسلام آباد پولیس کی جانب سے اب تک کی جانے والی تفتیش پر عدم اطمینان کا اظہار کرتے ہوئے کہا ہے کہ پولیس اس مقدمے میں خط و کتابت سے آگے نہیں بڑھی ہے۔	real
1523	پاکستان کے سب سے بڑے شہر کراچی میں ’کشمیر ڈے‘ پر جماعت اسلامی کی ریلی پر کریکر حملہ کیا گیا ہے، جس میں ایک شخص ہلاک اور کم از کم 38 افراد زخمی ہو گئے ہیں۔	real
1524	گلگت بلتستان کا محکمۂ جنگلی حیات آج کل برفانی تیندوے کے ان دو بچوں کی تلاش میں ہے جن کی ماں کو ہلاک کر کے اس کی کھال فروخت کرنے کی کوشش کرنے والے دو افراد کو حال ہی میں جرمانے اور قید کی سزا سنائی گئی ہے۔	real
1525	اپوزیشن کی گذشتہ دو سال کی کارکردگی دیکھتے ہوئے باآسانی یہ کہا جا سکتا ہے کہ اگلے چھ ماہ میں کوئی احتجاجی تحریک یا کسی بڑی مزاحمتی تحریک کا امکان نظر نہیں آ رہا۔	real
1526	حکومتِ سندھ نے ایک احسن فیصلے میں ہندوستان کی حکومت کو یقین دہانی کروائی ہے کہ وہ پاکستان کی حکومت کے قیام کے بعد بھی وعدے کے مطابق گندم، چاول اور بھوسے کی فراہمی جاری رکھے گی۔	real
1527	سپریم کورٹ نے چیئرمین نیب کے افسران بھرتی کرنے کے اختیار کا نوٹس لیتے ہوئے کہا ہے کہ اس ادارے کا سربراہ جو خود سپریم کورٹ کے جج رہے ہیں، آئین اور قانون کو بائی پاس کر کے کیسے بھرتیاں کر سکتے ہیں۔	real
1528	جب آصف مگسی ٹھٹہ میں اپنے ماموں کے فش فارم پر دوستوں کے سامنے تقریباً ایک درجن موٹر سائیکلوں کو پھلانگنے کی تیاری کر رہے تھے تو ان کا دل تیزی سے دھڑک رہا تھا اور ذہن میں بار بار یہی خیال آ رہا تھا: کہیں ایسا نہ ہو کہ وہ ناکام ہو جائیں اور انھیں دوستوں کے سامنے شرمندگی کا سامنا کرنا پڑے۔	real
1529	لاہور ہائی کورٹ کے راولپنڈی بینچ نے دو لڑکیوں کی مبینہ شادی سے متعلق درخواست میں عاصمہ بی بی عرف علی آکاش (دولہا) کے ناقابل ضمانت وارنٹ گرفتاری جاری کر دیے ہیں اور حکام کو حکم دیا گیا ہے کہ وہ ملزم کو گرفتار کر کے اگلے دو روز میں عدالت میں پیش کریں۔	real
1530	پانچ اگست اس پاکستانی بینکار کا یومِ وفات ہے جس نے متحدہ عرب امارات کے سربراہ شیخ زید بن سلطان النہیان کی مالی اعانت سے بینک آف کریڈٹ اینڈ کامرس انٹرنیشنل کے نام سے ایک عالمی بینک کے قیام کا ڈول ڈالا اور جس کا خواب تھا کہ وہ ورلڈ بینک کی طرز پر ایک عالمی اسلامی بینک قائم کریں۔	real
1531	انڈیا کے زیرِ انتظام کشمیر میں آرٹیکل 370 کے خاتمے کے لیے پانچ ہزار سے زیادہ کشمیری گرفتار ہوئے اور اب بھی سینکڑوں افراد بیرونِ کشمیر محبوس ہیں۔	real
1532	انگلینڈ کی وکٹوں پہ اب تک کافی دھوپ پڑ چکی ہے اور وہ قدرے خشک ہو رہی ہیں۔ گویا اب ان وکٹوں پہ سیم کا تناسب کم ہوتا جائے گا اور سپن کے امکانات بڑھتے جائیں گے۔ یہی سوچ ہے کہ جس کی بنیاد پہ آج مصباح الحق دو سپنرز کے ساتھ میدان میں اترنے کا فیصلہ کریں گے: پڑھیے سمیع چوہدری کا کالم۔	real
1533	جوناگڑھ کے مقامی بزرگوں اور خطے کے مورخین کا کہنا ہے کہ نواب محمد مہابت خان نے ریاست کو پاکستان میں ضم کرنے کا فیصلہ اپنے دیوان شاہنواز بھٹو کے دباؤ میں آ کر کیا تھا۔	real
1534	جہاں کئی صارفین اس سیلفی اور پولیس کے کردار پر تنقید کرتے اور یہ کہتے نظر آئے کہ ایک قاتل کی حوصلہ افزائی کرنا بند کیجیے، وہیں کئی صارفین ملزم خالد کے ساتھ پولیس کی تصویر دیکھ کر خاصے خوش ہیں اور انھیں دنیا کا واحد قیدی قرار دے رہے ہیں جن کے ساتھ پولیس بھی سیلفی لینے پر فخر محسوس کرتی ہے۔	real
1535	تحریک انصاف کی حکومت خاموشی کے منٹ بڑھا دے، کشمیر کمیٹی پر کسی کو بھی لگا دے، ساری ہائی ویز کے نام سرینگر رکھ لے تب بھی کیا کشمیر اور کشمیریوں کے دل فتح کرنے میں کامیابی ہو گی؟ کشمیر کا مقدمہ لڑنا ہے تو سرینگر ہائی وے پر چڑھنے کے لیے پاکستان کو زور دار ہارن بھی دینا ہو گا اور اپنا راستہ بھی لینا ہو گا۔	real
1536	رفال میں ایسی کیا خاص بات ہے جو کسی اور طیارے میں نہیں؟ بی بی سی نے اس حوالے سے کچھ حقائق جاننے کی کوشش کی ہے اور انڈیا اور پاکستان کی فضائیہ کے حکام کا نکتہ نظر بھی اس موازنے میں شامل کیا گیا ہے۔	real
1537	حاجی محمد نعیم کو شاید اتنے لوگ نہیں جانتے۔ لیکن ان کا پلاؤ کباب کا کاروبار پاکستان کے جڑواں شہروں میں مقبول ہے۔ سنہ 1988 میں یہ کاروبار ایک چھوٹی سی دکان میں 18 کرسیوں کے ساتھ 'سیور' کے نام سے شروع کیا گیا تھا۔	real
1538	انڈین پنجاب کے شہر امرتسر کے قریب واقع جاتی عمرہ ایک معمولی سا گاؤں ہے جو تقسیم کے 70 سال بعد بھی اپنے ایک خاندان کے غیر معمولی سفر پر ناز کرتا ہے۔	real
1539	مانچسٹر گارڈین کے حوالے سے خبر شائع ہوئی کہ اگر سکھ پاکستان میں شامل ہونا چاہتے ہیں تو یہ ہندوستان کے لیے اچھا ہوگا۔	real
1540	پاکستان میں آن لائن قربانی کا تجربہ کچھ لوگوں کے لیے مثبت نہ رہا۔ ’کسی کو گوشت کم ملا، کسی کو خراب تو کسی کو کوئی گوشت ملا ہی نہیں۔‘	real
1541	آج سے ستر برس پہلے صحرائی علاقوں میں بارش نہ ہونے کی وجہ سے سندھ میں تقریباً دو لاکھ افراد کو قحط کا سامنا تھا۔	real
1542	گزشتہ روز جب پاکستان فوج کے شعبہ تعلقات عامہ آئی ایس پی آر نے کشمیریوں کو خراج تحسین پیش کرنے کے لیے ایک گانا ’جا چھوڑ دے میری وادی’ ریلیز کیا تو سوشل میڈیا پر ٹرینڈ کرنے لگا۔	real
1543	اپنی محبت حاصل کرنے کے لیے مذہب تبدیل کرنے اور ملک چھوڑنے کی جدوجہد کے بعد بھی حکومتوں سے برسرپیکار محبت کرنے والوں کی کہانی۔	real
1544	پاکستان اور انگلینڈ کے درمیان تین ٹیسٹ میچوں کی سیریز کا پہلا ٹیسٹ بدھ کے روز سے مانچسٹر کے اولڈ ٹریفرڈ گراؤنڈ میں شروع ہونے جا رہا ہے اور یہ سوال دلچسپی سے خالی نہیں کہ کیا پاکستانی کرکٹ ٹیم دو سپنرز کے ساتھ میدان میں اترے گی یا نہیں؟	real
1545	بات ماں کی گالی کی نہ ہوتی تو شاید اس دن بھی تحریم اپنے ساتھی کارکنوں کے جملوں کو نظرانداز کرتے ہوئے سٹوڈیو میں جاتیں اور پروگرام ریکارڈ کرواتیں لیکن اس دن انھوں نے فیصلہ کر لیا کہ بس اب وہ خاموش نہیں بیٹھیں گی۔	real
1546	اسلام آباد ہائی کورٹ نے مبینہ انڈین جاسوس کلبھوشن جادھو کو تیسری قونصلر رسائی دینے کے لیے حکومتِ پاکستان کو انڈیا کی حکومت سے رابطہ کرنے کی ہدایت کی ہے۔	real
1547	انڈیا کے زیرِ انتظام کشمیر میں طویل قدغنوں اور کورونا وائرس سے پیدا ہونے والے حالات کے باعث زمینی صورتحال انتہائی غیر یقینی ہے، اور یہ کوئی نہیں جانتا کہ سیاست کا اُونٹ کس کروٹ بیٹھے گا۔	real
1548	پاکستان سے جانوروں کے گوشت کی بیرون ملک برآمد اور غیر ملک سے اندرون ملک گوشت کی درآمد عرصہ دراز سے جاری ہے۔	real
1549	آج تک جس طرح نیب حسبِ ضرورت محمود و ایاز کو ایک صف میں یا ایک صفحے پر لانے میں حسبِ ضرورت کامیاب ہوا۔ ماضی کا کوئی ادارہ یا ایجنسی اتنے موثر ثابت نہیں ہو سکے۔ پڑھیے وسعت اللہ خان کا کالم۔	real
1550	صوبہ پنجاب کے شہر لاہور میں ایک ایسا منصوبہ سامنے آیا ہے جس کے ذریعے شہر میں سیلاب آنے سے بچا جاسکے گا اور زیر زمین پانی کا ایک مصنوعی ذخیرہ بھی تیار ہوسکے گا۔	real
1551	عید کے پہلے روز لاپتہ افراد کے رشتہ داروں نے کوئٹہ شہر میں اپنے پیاروں کی بازیابی کے لیے مظاہرہ کیا تو جہانزیب قمبرانی کی والدہ نے بھی بیٹے کے لیے عید کے کپڑوں اور جوتوں کے ساتھ اس میں شرکت کی کہ ’کہیں ایسا نہ ہو کہ وہ اچانک گھر آئیں اور انھیں نئے کپڑوں اور جوتوں کے بغیر یہ تہوار منانا پڑے۔‘	real
1552	جس وقت آدھی دنیا کو دہشت گرد اور باقیوں کو ان کے اعمال کا ذمہ دار قرار دے کے ایک بے مقصد جنگ لڑی جا رہی تھی، چین اپنی جڑیں مضبوط کرتا گیا، حتی کہ آج سب نے دیکھا کہ آخر کار چین نے انجے پنجے نکال لیے ہیں اور اپنے ہونے کا احساس دلانے کے لیے انڈیا کی طرف اپنا رویہ بدل لیا ہے۔	real
1553	کیا آپ جانتے ہیں کہ برطانیہ کے لارڈز میوزیم میں ایک خاص گیند اور چڑیا موجود ہے جس کی تاریخ پاکستانی بولر جہانگیر خان سے جڑی ہے۔ یہ وہی جہانگیر خان ہیں جو سابق کرکٹر بازید خان کے دادا تھے۔	real
1554	نئی آنے والی سریز ’چڑیلز‘ کی اداکاراؤں کے مطابق اس خطے میں ایسی خواتین کے لیے ’بُری عورت‘ اور ’چڑیل‘ جیسے الفاظ استعمال کیے جاتے ہیں جو بہادری دکھا کر اپنے حقوق کے لیے آواز اٹھاتی ہیں۔	real
1555	شاہداد ممتاز اپنے نظریے کی وجہ سے مارے گئے۔ لیکن کیا ان کی طرح ثنا بلوچ، جو فی الحال لاپتہ ہیں، بھی پاکستانی ریاست کے خلاف اعلان جنگ کرسکتے ہیں؟	real
1556	کورونا وائرس کے بعد عائد کردہ سفری پابندیوں میں نرمی کے بعد پاکستان بالخصوص بلوچستان کے علاقوں سے غیر قانونی طور پر یورپ جانے کی کوششوں میں بہت زیادہ ہوا ہے۔	real
1557	پاکستان میں تیل کی کمپنیاں وفاقی حکومت کے حکم کے مطابق آئندہ چند ماہ میں ایسا پٹرول اور ڈیزل درآمد کرنے سے ہچکچا کیوں رہی ہیں جو یورو 5 کے معیار پر پورا اترتا ہو۔	real
1558	بلوچستان کے افغانستان سے متصل سرحدی شہر چمن کی کشیدہ صورتحال کے حوالے سے حکومت بلوچستان اور دھرنا کمیٹی کے درمیان مذاکرات کامیاب ہوگئے ہیں اور مقامی تاجروں اورمحنت کشوں نے گذشتہ 62 روز سے وہاں جاری دھرنے کو ختم کردیا ہے۔	real
1559	کیا یہ تاثر درست ہے کہ ’پنجاب میں نواز لیگ نے لاہور کو نوازا‘ اور ’پیپلز پارٹی نے کراچی میں اپنا سیاسی مفاد نہ دیکھتے ہوئے اسے نظر انداز کیا۔‘ جانیے کہ یہ تاثر کیوں ہے اور صوبائی سے ضلعی سطح تک پیسے کی فراہمی میں کیا مشکلات درپیش ہیں؟	real
1560	گلگت بلتستان کے علاقے چلاس میں سی ٹی ڈی کی ایک کارروائی اور فائرنگ کے دوران ہلاک ہونے والے طالبعلم اظہار اللہ کی والدہ کے مطابق ان کے بیٹے کو پڑھنے کا شوق تھا اور اسے امید تھی کہ اس کے افسر بننے کے بعد جلد ’اچھے دن‘ آئیں گے۔	real
1561	آئیے لاہور کی فلم نگری لالی وڈ چلے چلتے ہیں جہاں آج بھی ایسی فلمیں تیار ہو رہی ہیں جنھیں حقیقت سے دور کہانیوں، کمزور کردار نگاری اور غیر معیاری پروڈکشن کی وجہ سے دل بھر کر بُرا بھلا کہا جاتا ہے۔	real
1562	اس بات سے قطع نظر کہ کیا تانیہ آئدروس اپنا کام درست انداز میں کر رہی تھیں یا نہیں، بہت سے لوگوں کے ذہن میں یہ سوال ہے کہ انھیں بلایا کس کام کے لیے تھا اور یہ کہ کسی ملک کو ڈیجیٹل کیسے بنایا جاتا ہے؟	real
1563	انڈیا نے مشکل اوقات میں شیخ حسینہ اور بنگلہ دیش کے ساتھ بہتر تعلقات کی بنیاد رکھی تھی لیکن کیا اب حالات بدل رہے ہیں؟ کیا بنگلہ دیش حسینہ واجد کی سربراہی میں پاکستان اور چین کے قریب جا رہا ہے؟	real
1564	وزیراعظم عمران خان کی جانب سے قدرتی آفات سے نمٹنے کے ادارے کو کراچی میں بارش کے بعد بحالی کے عمل کو سنبھالنے اور اس سلسلے میں فوج کی مدد لینے کے بیان پر صوبائی وزیر سعید غنی کا کہنا ہے کہ این ڈی ایم اے ضرور آئے لیکن پانی کی نکاسی تو دو دن قبل کر دی گئی تھی۔	real
1565	ہم نے اسلام کو درپیش خطرات سے اپنی قوم کو اتنا خبردار کر دیا ہے کہ اب لوگ جنت کے ٹکٹ کے لیے چوہدری پرویز الہی کے کسی نئے قانون کا انتظار نہیں کرتے بلکہ کسی کا خون کر کے جنت کا ٹکٹ خود ہی خرید لیتے ہیں: محمد حنیف کا کالم	real
1566	پاکستان میں ایف اے ٹی ایف کے اہداف کی روشنی میں انسداد دہشتگردی ایکٹ اور تعزیرات پاکستان میں ترامیم متعارف کرائی گئی ہیں جن کے مطابق مشتبہ دہشتگردوں کی فہرست میں شامل افراد کے اسلحہ لائسنس بھی منسوخ کردیے جائیں گے۔	real
1567	پاکستان میں سوشل میڈیا پر لائیو سٹریمنگ ایپ 'بیگو لائیو' خواتین کے لیے تفریح کے بدلے آسان آمدن کا ذریعہ تو بن رہی ہے لیکن کئی معاملوں میں بات جنسی استحصال اور بلیک میلنگ پر منتج ہوئی۔	real
1568	کوورنا وائرس نے جہاں کئی دوسرے معمولات زندگی کو جھنجھوڑا ہے وہیں عید الاضحیٰ کی رونقیں بھی ماند کر دی ہے۔ پاکستان میں کچھ وائرس کے پھیلاؤ کا خوف اور کچھ منڈیاں لگنے میں تاخیر نے اجتماعی قربانی کے رحجان میں اضافہ کر دیا ہے۔	real
1569	حکومت اور حزب مخالف کی جماعتیں احتساب بل کے حوالے سے ایک مرتبہ پھر آمنے سامنے آ گئی ہیں اور ایک دوسرے پر کرپشن کے الزامات لگا رہی ہیں۔	real
1570	اس کارروائی کی قیادت کرنے والے سی ٹی ڈی کے انسپکٹر نبی خان نے ایف آئی آر میں دعویٰ کیا ہے کہ اس کارروائی میں سی ٹی ڈی اہلکار اور گھر میں موجود شخص اظہار اللہ مفرور ہونے والے ملزمان کی فائرنگ سے ہلاک ہوئے ہیں۔	real
1571	پشاور پولیس کے مطابق ملزم طاہر احمد نسیم کو بدھ کو عدالت میں مقدمے کی سماعت کے لیے لے جایا گیا جہاں ایک شخص عدالت میں داخل ہوا اور ان پر فائرنگ کر دی جس سے وہ ہلاک ہو گئے۔	real
1572	پاکستان کے وزیرِ اعظم عمران خان کے معاون خصوصی برائے صحت ڈاکٹر ظفر مرزا اور معاون خصوصی برائے ڈیجیٹل پاکستان تانیہ آئدروس نے اپنے اپنے عہدوں سے مستعفی ہونے کا اعلان کیا ہے۔	real
1573	بارکھان میں عام لوگوں کے مسائل کو اجاگر کرنے کے لیے مقبول صحافی انور جان کھیتران کے قتل کے خلاف سب سے بڑا احتجاجی مظاہرہ بارکھان میں کیا گیا، جہاں انھیں 23 جولائی کو فائرنگ کر کے ہلاک کیا گیا تھا۔	real
1574	کورونا وائرس کے پھیلاؤ کو روکنے کے لیے اس برس سعودی حکومت نے حج کے شرکا کی تعداد محدود رکھنے کا فیصلہ کیا لیکن اس سے مکہ اور مدینہ کے مخلتلف کاروبار بری طرح سے متاثر ہوئے ہیں۔	real
1575	صوبہ پنجاب میں نصابی کتب کے منتظم ادارے نے حال ہی میں نجی سکولوں میں پڑھائی جانے والی ایسی سو نصابی کتابوں پر پابندی عائد کی ہے جن میں حکام کے مطابق ’حقائق کے منافی، غلط، غیر اسلامی، پاکستان مخالف اور گمراہ کُن معلومات‘ شائع کی گئی ہیں۔	real
1576	اوکاڑہ سے تعلق رکھنے والے سید ضیا عباس شاہ کو تقریباً دس سال جیل میں قید کے بعد رہائی ملی اور وہ اس بنیاد پر کہ ان کے خلاف اغوا برائے تاوان کا الزام غلط تھا۔ کیا پاکستان میں غلط مقدمات میں سزا پانے والوں کے نقصان کا ازالہ کیا جاتا ہے؟	real
1577	انڈیا نے لاہور کے نو لکھا بازار میں سکھ مذہب کے مقدس مقام گرودوارہ شہیدی استھان بھائی تارو جی کے حوالے سے پاکستان کے ہائی کمیشن سے سخت احتجاج کیا ہے۔ یہ احتجاج ایک مقامی شخص کی متنازعہ ویڈیو وائرل ہونے کے بعد کیا گیا جس میں پاکستان میں بسنے والی سکھ برادری کے خلاف توہین آمیز زبان استعمال کی گئی ہے۔	real
1578	سندھ کے صوبائی دارالحکومت کراچی میں گذشتہ دو روز کے دوران ہونے والی بارشوں سے جہاں کئی علاقے ندی نالے کا منظر پیش کرتے رہے وہیں اس مسئلے کو سیاسی جماعتوں نے اپنے حریفوں کو زیر کرنے کا ذریعہ بنا رکھا ہے۔	real
1579	حزب اختلاف کے پلڑے میں نون لیگ کا وزن حکومت پر دباؤ بڑھا سکتا ہے۔ مڈ ٹرم انتخابات اور اس سے قبل انتخابی اصلاحات کے لیے جز وقتی تبدیلی کے فارمولے کی راہ میں رکاوٹ خود نون لیگ کا ایک صفحے پر نہ ہونا ہے۔ عاصمہ شیرازی کا کالم۔	real
1580	پاکستانی سیاست کی اس سنسنی خیز اور ڈرامائی کہانی کا انکشاف خان آف قلات نے اپنی کتاب میں کیا جو 1975 میں شائع ہوئی۔ یہ تمام واقعات چونکہ صرف تین شخصیات کے درمیان تھے، اس لیے ان واقعات پر خاموشی کا پردہ پڑا رہا۔	real
1581	پاکستان کے صوبے پنجاب میں شیعہ علما کونسل نے سپیکر پنجاب اسمبلی پرویز الٰہی کو تحفظِ بنیادِ اسلام ایکٹ پر اپنے تحفظات سے آگاہ کیا ہے جس کے بعد کونسل کے سیکریٹری جنرل کے مطابق انھیں یقین دہانی کرائی گئی ہے کہ اس بل کو اس وقت تک آگے نہیں بھیجا جائے گا جب تک کہ تمام مکاتب فکر اور علما کے ساتھ مشاورت نہیں کر لی جاتی۔	real
1582	پاکستان کے سب سے بڑے شہر کراچی کے پریس کلب کی انتظامیہ کے مطابق رینجرز کے اہلکار کلب میں داخل ہوئے اور کچھ دیر تلاشی کے بعد واپس چلے گئے۔ پریس کلب کی انتظامیہ کی طرف سے اس کارروائی کی شدید مذمت۔	real
1583	پاکستان میں میٹرس بنانے والی کمپنی ڈائمنڈ فوم نے اپنی ویب سائٹ پر نئے میٹرس 'ساہا' کو یہ کہہ کر متعارف کروایا کہ یہ پاکستان کا ’پہلا اسلامی میٹرس‘ ہے۔	real
1584	حکومت پنجاب اور وفاقی دارالحکومت اسلام آباد کی انتظامیہ نے عید الاضحی کی تعطیلات کے دوران کورونا کے پھیلاؤ کے خدشات کے پیش نظر پہلے سے عائد پابندیوں کو مزید سخت کرنے کا اعلان کیا ہے۔	real
1585	حزب اختلاف کی جماعتوں کی جانب سے کڑی تنقید کے بعد وفاقی حکومت نے پیر کو جمعیت علمائے اسلام (ف) کے سربراہ کے بھائی ضیا الرحمن کی خدمات صوبہ سندھ سے واپس لے کر صوبہ خیبر پختونخوا کے حوالے کر دی ہیں۔	real
1586	جوہی تھانے میں ان مرغوں کو لاک اپ یا مال خانے میں نہیں رکھا گیا بلکہ انھیں کھلی جگہ میں ایک ٹانگ میں رسہ باندھ دیا گیا ہے۔ یہ روزانہ ایک سو روپے تک کا باجرہ کھا جاتے ہیں جو پولیس کو اپنے جیب سے خریدنا پڑتا ہے۔	real
1587	سنہ 1992 میں کراچی میں شروع ہونے والے ’آپریشن بلیو فوکس‘ نے 90 کی دہائی کو اس شہر کے لیے ایک ایسی پرتشدد دہائی میں تبدیل کیا جس کے سائے آج بھی اس شہر کی گلیوں میں منڈلاتے ہیں۔	real
1588	بلوچستان کے سب سے بڑے تعلیمی ادارے یونیورسٹی آف بلوچستان میں خفیہ ویڈیوز بنانے اور طالبات کو ہراساں کرنے کے الزام میں یونیورسٹی سنڈیکیٹ نے سابق وائس چانسلر جاوید اقبال سمیت پانچ ملازمین کو مختلف نوعیت کی سزائیں دی ہیں۔	real
1589	نیب قانون میں ترامیم متعارف کرانے کے لیے حکومت اور حزب اختلاف نے ایک دوسرے کے ساتھ مجوزہ مسودوں کا تبادلہ کیا ہے۔ پیر کی شام وزیر خارجہ شاہ محمود قریشی کی سربراہی میں پارلیمانی کمیٹی کے اجلاس میں ان مسودوں پر غور کیا جائے گا۔	real
1590	اگر پنجاب تحفظِ بنیادِ اسلام ایکٹ پر ہو بہو عمل ہوتا ہے تو پھر علما بورڈ کی منظور شدہ مذہبی کتابوں کے علاوہ کوئی بھی کتاب شائع یا درآمد کرنا ممکن نہیں ہو گا۔ سائنس، تاریخ، فلسفے، جغرافیے، حالاتِ حاضرہ، ادبیات وغیرہ کو بھول جائیں۔ کیونکہ غالب و اقبال کی شاعری سمیت ہر کتاب میں کچھ نہ کچھ ایسا ضرور نکل آئے گا جو قومی سلامتی، ثقافتی و مذہبی اقدار و فرقہ وارانہ ہم آہنگی کے منافی ہو۔ پڑھیے وسعت اللہ کا…	real
1591	صادق نے مغربی ریاست مہاراشٹر کے کراڑ کے رام راؤ مولک کے شاگرد راگھو بنپوری کو دھول چٹائی لیکن جب انھوں نے پہلوان ماروتی وڈار کو شکست دے دی اس کے بعد سے اس علاقے میں ان کا دبدبہ قائم ہو گيا۔	real
1592	جس طرح ’مبینہ پولیس مقابلے‘ کوئی ڈھکی چھپی بات نہیں اور سب جانتے ہیں کہ یہ ماورائے عدالت قتل ہے مگر سب اسے جرم و سزا کا ایک ضروری باب سمجھ کر خاموش ہیں، اسی طرح یہ اغوا بھی کوئی راز نہیں۔ پڑھیے آمنہ مفتی کا کالم۔	real
1593	چینی انکوائری کمیشن کی تحقیقات کے دوران مختلف الزامات کے تحت معطل ہونے والے فیڈرل انویسٹیگیشن ایجنسی (ایف آئی اے) کے ایڈیشنل ڈائریکٹر سجاد مصطفیٰ باجوہ کو محکمانہ انکوائری میں قصور وار قرار دیتے ہوئے نوکری سے برخاست کرنے کی سفارش کی گئی ہے۔	real
1594	فوارہ چوک کراچی کے وسطی علاقے کی ایک بڑی پہچان ہے، لیکن کیا یہ فوارہ چوک اپنی حقیقی شکل و صورت میں موجود ہے؟	real
1595	دہشت گردی کے خلاف جنگ کے دوران شدت پسندوں کے حملوں سے متاثرہ سیاسی قوم پرست جماعت عوامی نیشنل پارٹی نے گزشتہ ادوار میں اتار چڑھاؤ دیکھے اور جماعت کو قائدین کی پالیسیوں اور دیگر عوامل کی وجہ سے نقصانات بھی اٹھانا پڑے تھے۔	real
1596	پاکستان کے صوبے پنجاب کی اسمبلی نے حال ہی میں ایک قانون منظور کیا ہے جس میں ایسی کتابوں کی نشر و اشاعت پر سزائیں تجویز کی گئی ہیں جن میں اسلام اور پاکستان کے بارے میں ’قابلِ اعتراض‘ تصور کیا جانے والا مواد ہو تاہم مختلف حلقوں کی جانب سے اس قانون کو دقیانوسی قرار دیا گیا ہے۔	real
1597	’ایک انجیکشن فروری کے مہینے میں آنکھوں میں لگوایا تھا۔ اب یہ دوسرا انجیکشن تھا۔ یہ انجیکشن لگوانے کے بعد واپس پہنچا تو بہت زیادہ جھنجلاہٹ اور بے چینی ہو رہی تھی۔ میں سپورٹس مین ہوں، حوصلہ کر کے کسی نہ کسی طرح سو گیا۔ صبح سو کر اٹھا تو کچھ نظر نہیں آ رہا تھا۔	real
1598	انڈین انٹیلی جنس ادارے را کے بانی رمیشور ناتھ کاو کے بارے میں کہا جاتا ہے کہ انھوں نے پاکستان اور انڈیا کے مابین 1971 کی جنگ میں کلیدی کردار ادا کیا تھا۔	real
1599	پاکستان میں جبری گمشدگیوں کے معاملے میں غیر معمولی اعتراف کرتے ہوئے پاکستان کی فوج نے تصدیق کی کہ 56 سالہ ادریس خٹک ان کی سکیورٹی ایجنسی کی تحویل میں ہیں اور ان پر سیکریٹ ایکٹ کے تحت کارروائی کی جا رہی ہے۔ ادریس خٹک تقریباً سات ماہ سے لاپتہ تھے۔	real
1600	نیشنل تھریٹ انیشیٹو کی 2020 کی اس رپورٹ میں پاکستان کی طرف سے کیے گئے اقدامات کو سراہتے ہوئے کہا گیا ہے کہ ملک میں جوہری مواد کے تحفظ کو یقینی بنانے کے لیے خاصی محنت کی گئی ہے اور اس بارے میں اقدامات پر عمل در آمد کرنے میں بھی ’بہتری آئی ہے۔‘	real
1601	اسلام آباد ہائی کورٹ نے پی ٹی اے کی جانب سے رواں ماہ آن لائن گیم پب جی پر لگائی گئی پابندی کا فیصلہ کالعدم قرار دیتے ہوئے اسے فوری طور پر بحال کرنے کا حکم دے دیا ہے۔	real
1602	بیگو پر ’پی کے‘ گیم میں صارفین پیسوں کے بدلے خریدے جانے والے ’بیگو ڈائمنڈز‘ سے اپنے پسندیدہ پلیئرز کو تحائف بھیجتے ہیں جو ان کے مہینہ وار ٹارگٹ کی تکمیل کا واحد ذریعہ ہے۔ اگر وہ کامیاب ہو جائیں تو انھیں بیگو کی طرف سے ماہانہ تنخواہ اور کمیشن بھی وصول ہوتا ہے۔	real
1603	پاکستان میں کورونا وائرس کے باعث گذشتہ چند ماہ سے سیاحت پر مکمل پابندی عائد ہے اور حکام کے مطابق یہ پابندی عیدالاضحی کے موقعے پر بھی لاگو رہے گی، تاہم چند سیاح ایسے ہیں جو مختلف حربے استعمال کرتے ہوئے مشہور سیاحتی مقامات تک پہنچنے میں کامیاب ہو رہے ہیں۔ اس حوالے سے پڑھیے یہ تفصیلی رپورٹ۔	real
1604	یہ دونوں کشتیاں دریا کے دونوں کناروں کے درمیان رابطے کا واحد ذریعہ تھیں اور ان پر سفر کرنے والوں کی اپنی اپنی ضروریات ہوتی تھیں۔ ان کشتیوں کی اپنی تاریخ اور اپنی کہانیاں ہیں اور ان سے جڑی متعدد یادیں اکثر مقامی لوگ بیان کرتے ہیں۔	real
1605	منگل کو اسلام آباد سے اغوا ہونے والے صحافی مطیع اللہ جان نے اس واقعے سے متعلق جمعرات کو اسلام آباد پولیس کو اپنا بیان ریکارڈ کرانے کے بعد یوٹیوب پر ایک ویڈیو اپ لوڈ کر کے اپنے ساتھ پیش آنے والے واقعے سے متعلق مختلف دعوے کیے ہیں۔	real
1606	پاکستان میں جمعرات کو دوپہر کے وقت ایک ایسا ٹرینڈ شروع ہوا جو تھا تو قابل تعریف مگر ساتھ ساتھ حیرت انگیز بھی۔ یہ ٹرینڈ سندھ کے ایک چھوٹے سے شہر مورو میں لائبریری کے مطالبے کا تھا۔	real
1607	چند ہفتے قبل بنگلہ دیش کے وزیرِ خارجہ اے کے عبدالمومن اور ڈھاکہ میں پاکستانی ہائی کمشنر عمران احمد صدیقی کے درمیان ہونے والی ملاقات کا مقصد اس وقت سمجھ آیا جب بدھ کی دوپہر پاکستان کے وزیرِ اعظم عمران خان کے دفتر نے ٹویٹ کر کے یہ اعلان کیا کہ انھوں نے بنگلہ دیشی وزیرِ اعظم شیخ حسینہ واجد سے طویل گفتگو کی ہے۔	real
1608	پاکستانی ٹیم کے چار روزہ پریکٹس میچ میں محمد رضوان نے عمدہ بیٹنگ کرتے ہوئے پہلی اننگز میں ناقابل شکست نصف سنچری اور دوسری اننگز میں ناقابل شکست سنچری سکور کی ہے اور وہ ہی نمبر ایک وکٹ کیپر کے طور پر ٹیسٹ سیریز کا آغاز کریں گے۔	real
1609	بدھ کو رویت ہلال کمیٹی کی جانب سے ذوالحج کے چاند کے اعلان کے بعد پاکستان کے وفاقی وزیر برائے سائنس و ٹیکنالوجی چوہدری فواد حسین نے اپنے ٹوئٹر اکاؤنٹ پر چاند کی ایک تصویر شیئر کی اور ساتھ لکھا کیا یہ پہلی کا چاند ہے؟ اس ٹویٹ کے بعد عید کی تاریخ پر بحث شروع ہوگئی۔	real
1610	پاکستان کی عدالتِ عظمیٰ نے اینکر پرسن مرید عباس قتل کیس میں مرکزی ملزم عاطف زمان کے چھوٹے بھائی عادل زمان کی ضمانت کی منسوخی کے لیے دائر درخواست پر فریقین کو نوٹس جاری کر دیے ہیں۔	real
1611	پاکستان کے الیکٹرانک میڈیا پر نشر ہونے والے ٹاک شوز میں یوں تو آئے روز سیاست دانوں کی آپسی نوک جھوک جاری رہتی ہے تاہم گذشتہ روز ایک ٹاک شو پر معاملات تب بگڑے جب موضوعِ بحث 'اجرک' بنی۔	real
1612	; "پوسٹ مارٹم رپورٹ کے مطابق عظمی کو سر پے کسی بھاری چیز سے مارا گیا تھا جس کی وجہ سے اس کی موت ہوئی، عظمی کے لواحقین کا کہنا تھا کہ ان کے ساتھ ناانصافی کی جارہی ہے، ملزمہ ماہ رخ نے ہی ان کی بچی کا قتل کیا ہے۔ عظمی کے والدین کا کہنا تھا کہ ان کا مطالبہ ہے کہ ملزمان کو جلد گرفتار کیا جائے۔"; "سولہ سالہ عظمی کے ملزمان تاحال گرفتار نہ ہو سکے، لواحقین کا کہنا تھا کہ عظمی اقبال ٹاون میں ماہ رخ نامی عو…	real
1613	; مناواں میں گھریلو جھگڑے پر بہنوئی نے اپنی سالی اور چار بچوں کی ماں بتیس سالہ شکیلہ کو قتل کر دیا۔ حادثے کی اطلاع ملنے پر پولیس جائے حادثہ پر پہنچ گئی اور شکیلہ بی بی کی لاش کو تحویل میں لے کر پوسٹمارٹم کیلئے مردہ خانے منتقل کر دیا اور جائے وقوعہ سے شواہد بھی اکٹھے کر لیے۔; پولیس کا کہنا ہے کہ مقتولہ کو گلا دبا کر قتل کیا گیا۔ ملزم ارشد کا اپنی سالی سے جھگڑا ہوا اور وہ اسے قتل کر کے موقع سے فرار…	real
1614	; "بادامی باغ میں منگنی توڑنے پر شہباز نامی لڑکے نے طیش میں آکر سابق منگیتر سونیا اور اسکی ماں رضیہ کو گولیاں ماردیں، گولیاں لگنے سے دونوں خواتین موقع پر ہی جاں بحق ہوگئیں جبکہ ملز م موقع واردات سے فرار ہوگیا۔"; "حادثے کی اطلاع ملنے پر پولیس موقع پر پہنچ گئی اور نعشیں قبضہ میں لے کر پوسٹمارٹم کیلئے ہسپتال منتقل کردیں، پولیس نے جائے وقوع سے شواہد اکٹھے کر کےتفتیش شروع کردی ہے۔"	real
1615	; ; سٹی42 کے مطابق شیرا کورٹ کی فریدہ اپنے منگیترے خلاف عدالت پہنچ گئی۔ ایڈیشنل سیشن جج سیف اللہ نے کیس کی سماعت کی۔ متاثرہ لڑکی کا کہنا تھا کہ دبئی میں کام کرتی ہوں۔ سیف اللہ سے2013میں منگنی ہوئی۔ منگیترمجھ سےرقم منگواتا رہا۔ لاکھوں روپے ہتھیالیے۔; فریدہ کا مزید کہنا تھا کہ اب پتہ چلا ہے کہ وہ کسی اورسےشادی کر رہا ہے۔ میں نےرقم کا مطالبہ کیا تو مجھے زدوکوب کیا۔ سیف اللہ اب مجھے جان سے مارناچاہتا…	real
1616	; "ایس پی صدراحسن سیف پولیس کی بھاری نفری سمیت موقع پرپہنچ گئے،انکا کہنا تھا کہ تینوں ملزمان کو گرفتار کرکےتھانےمنتقل کردیا گیا ہے،ایس پی صدرکا مزیدکہنا تھا کہ ملزمان کی گاڑی قبضےمیں لیکرمزید کارروائی کی جا رہی ہے۔"; "پولیس کےمطابق گرین ٹاؤن کےعلاقےفیروزپارک میں میاں بیوی کے درمیان جھگڑا ہوا،جنہیں پیرظفر شاہ کے پاس صلح کےلیےلایا گیا،اسی دوران خاتون کےرشتہ داروں نے حملہ کر دیا اور چھریوں کےوارسےپ…	real
1617	; ملزمان کے قبضے سے 10لاکھ روپے نقدی اور دیگر اشیاء برآمد کر کے مزید تفتیش کی جا رہی ہے; \; تفصیلات کے مطابق ہومی سائیڈ یونٹ کاہنہ نے کارروائی کرتے ہوئے میجر (ر) منیر احمدکوقتل کرنے والے دل مراد عرف زاہد اور ارشاد بی بی عرف جٹی کو گرفتار کر لیا۔ ملزمان کےقبضہ سے واردات میں استعمال ہونیوالا آلہ قتل ٹوکہ بھی برآمد کر لیا۔ دوران تفتیش ملزم نے انکشاف کیا کہ وہ ریٹائرڈ میجر منیر احمد کے پاس بطور ڈرائی…	real
[truncated: 2,479 more rows]
